# Supplementary material for: GmWRKY33a is a hub gene responsive to brassinosteroid signaling that suppresses nodulation in soybean (Glycine max)
Source: Front Plant Sci. 2025 Jan 16;15:1507307. doi: 10.3389/fpls.2024.1507307 (PMC11779726; doi:10.3389/fpls.2024.1507307)
Supplement: Supplementary file 9 [file Table2.xlsx]

## Sheet: Sheet1
Supplementary table 2 DEGs by BRHH24_vs_BRmo24
Gene_id	Gene_description	BRHH24_vs_BRmo24
Glyma.04G051000.Wm82.a4.v1	(1 of 12) PTHR12374//PTHR12374:SF19 - TRANSCRIPTIONAL ADAPTOR 2 ADA2 -RELATED // SUBFAMILY NOT NAMED	yes|up
Glyma.11G196200.Wm82.a4.v1	(1 of 20) PF04784//PF14389 - Protein of unknown function, DUF547 (DUF547) // Leucine-zipper of ternary complex factor MIP1 (Lzipper-MIP1)	yes|down
Glyma.13G338300.Wm82.a4.v1	(1 of 5) PTHR11040//PTHR11040:SF23 - ZINC/IRON TRANSPORTER // SUBFAMILY NOT NAMED	yes|up
Glyma.18G297500.Wm82.a4.v1	(1 of 4) PTHR12161:SF23 - REGULATOR OF VPS4 ACTIVITY IN THE MVB PATHWAY PROTEIN	yes|up
Glyma.06G275900.Wm82.a4.v1	(1 of 154) K00430 - peroxidase (E1.11.1.7)	yes|down
Glyma.12G197400.Wm82.a4.v1	(1 of 3) 3.1.7.11 - Geranyl diphosphate diphosphatase / Geranyl pyrophosphate pyrophosphatase	yes|up
Glyma.12G157500.Wm82.a4.v1	(1 of 2) PTHR31104//PTHR31104:SF1 - FAMILY NOT NAMED // GENOMIC DNA, CHROMOSOME 3, TAC CLONE:K15M2	yes|down
Glyma.05G133000.Wm82.a4.v1	(1 of 74) PF05678 - VQ motif (VQ)	yes|up
Glyma.01G037000.Wm82.a4.v1	(1 of 19) PTHR10201//PTHR10201:SF140 - MATRIX METALLOPROTEINASE // F20P5.11 PROTEIN	yes|down
Glyma.03G166500.Wm82.a4.v1	(1 of 2) PTHR31284:SF15 - HAD SUPERFAMILY, SUBFAMILY IIIB ACID PHOSPHATASE	yes|down
Glyma.13G362800.Wm82.a4.v1	(1 of 14) PF04862 - Protein of unknown function (DUF642) (DUF642)	yes|down
Glyma.15G055900.Wm82.a4.v1		yes|down
Glyma.20G085500.Wm82.a4.v1	(1 of 56) 3.1.3.2 - Acid phosphatase / Phosphomonoesterase	yes|down
Glyma.15G025300.Wm82.a4.v1	(1 of 6) PTHR31250:SF13 - CALMODULIN-BINDING PROTEIN	yes|down
Glyma.18G285300.Wm82.a4.v1		yes|down
Glyma.11G182600.Wm82.a4.v1	(1 of 2) PTHR23177//PTHR23177:SF20 - MKIAA1688 PROTEIN // RHO GTPASE-ACTIVATING PROTEIN 1-RELATED	yes|down
Glyma.12G178500.Wm82.a4.v1	(1 of 4) PTHR31945//PTHR31945:SF17 - FAMILY NOT NAMED // TRANSCRIPTION FACTOR FER-LIKE IRON DEFICIENCY-INDUCED TRANSCRIPTION FACTOR	yes|up
Glyma.11G019100.Wm82.a4.v1	(1 of 9) PF00560//PF07714//PF08263 - Leucine Rich Repeat (LRR_1) // Protein tyrosine kinase (Pkinase_Tyr) // Leucine rich repeat N-terminal domain (LRRNT_2)	yes|down
Glyma.05G156300.Wm82.a4.v1	(1 of 2) PTHR21266:SF25 - PROTOCHLOROPHYLLIDE-DEPENDENT TRANSLOCON COMPONENT 52, CHLOROPLASTIC	yes|down
Glyma.04G090100.Wm82.a4.v1	(1 of 4) PTHR31945:SF6 - TRANSCRIPTION FACTOR BHLH61-RELATED	yes|down
Glyma.02G027400.Wm82.a4.v1	(1 of 8) PTHR26402:SF526 - TWO-COMPONENT RESPONSE REGULATOR ARR15-RELATED	yes|down
Glyma.04G040600.Wm82.a4.v1	(1 of 4) PTHR14255//PTHR14255:SF11 - ATP-DEPENDENT PROTEASE CEREBLON // SUBFAMILY NOT NAMED	yes|down
Glyma.11G224400.Wm82.a4.v1	(1 of 5) PF00854//PF07690 - POT family (PTR2) // Major Facilitator Superfamily (MFS_1)	yes|down
Glyma.01G112600.Wm82.a4.v1	(1 of 9) PTHR11709:SF103 - LACCASE-16	yes|down
Glyma.18G037533.Wm82.a4.v1		yes|down
Glyma.05G163900.Wm82.a4.v1	(1 of 5) PTHR31062//PTHR31062:SF34 - FAMILY NOT NAMED // XYLOGLUCAN ENDOTRANSGLUCOSYLASE/HYDROLASE PROTEIN 15-RELATED	yes|down
Glyma.13G337900.Wm82.a4.v1	(1 of 3) K07025 - putative hydrolase of the HAD superfamily (K07025)	yes|down
Glyma.10G119400.Wm82.a4.v1	(1 of 14) PTHR10795//PTHR10795:SF348 - PROPROTEIN CONVERTASE SUBTILISIN/KEXIN // SUBFAMILY NOT NAMED	yes|up
Glyma.12G054700.Wm82.a4.v1	(1 of 8) PTHR11771//PTHR11771:SF42 - LIPOXYGENASE // PROTEIN C13C4.7	yes|down
Glyma.09G134100.Wm82.a4.v1	(1 of 8) PTHR11206//PTHR11206:SF109 - MULTIDRUG RESISTANCE PROTEIN // MATE EFFLUX FAMILY PROTEIN	yes|down
Glyma.03G157432.Wm82.a4.v1	(1 of 4) PTHR10593//PTHR10593:SF20 - SERINE/THREONINE-PROTEIN KINASE RIO // INDETERMINATE-DOMAIN 12 PROTEIN	yes|down
Glyma.15G107900.Wm82.a4.v1	(1 of 3) K02115 - F-type H+-transporting ATPase subunit gamma (ATPF1G, atpG)	yes|down
Glyma.08G076800.Wm82.a4.v1	(1 of 131) PF00892 - EamA-like transporter family (EamA)	yes|down
Glyma.11G219400.Wm82.a4.v1	(1 of 8) PTHR31867//PTHR31867:SF9 - FAMILY NOT NAMED // EXPANSIN-A6	yes|down
Glyma.09G270900.Wm82.a4.v1	(1 of 3) PTHR10891:SF589 - CALCIUM-BINDING PROTEIN CML42-RELATED	yes|up
Glyma.04G073000.Wm82.a4.v1	(1 of 7) PTHR31970:SF3 - MOLYBDATE TRANSPORTER 1	yes|down
Glyma.08G033100.Wm82.a4.v1	(1 of 4) PTHR32295//PTHR32295:SF22 - FAMILY NOT NAMED // PROTEIN IQ-DOMAIN 25	yes|down
Glyma.10G139700.Wm82.a4.v1	(1 of 8) PTHR31238//PTHR31238:SF39 - FAMILY NOT NAMED // GERMIN-LIKE PROTEIN SUBFAMILY 2 MEMBER 1-RELATED	yes|down
Glyma.09G284400.Wm82.a4.v1	(1 of 154) K00430 - peroxidase (E1.11.1.7)	yes|up
Glyma.04G020500.Wm82.a4.v1	(1 of 4) PTHR23504:SF36 - MAJOR FACILITATOR PROTEIN	yes|up
Glyma.17G034800.Wm82.a4.v1	(1 of 2) PTHR31515//PTHR31515:SF0 - FAMILY NOT NAMED // TRANSMEMBRANE PROTEIN	yes|up
Glyma.04G014000.Wm82.a4.v1	(1 of 4) PTHR23500//PTHR23500:SF109 - FAMILY NOT NAMED // POLYOL TRANSPORTER 5	yes|up
Glyma.16G016100.Wm82.a4.v1	(1 of 5) K08908 - light-harvesting complex I chlorophyll a/b binding protein 2 (LHCA2)	yes|down
Glyma.03G112000.Wm82.a4.v1	(1 of 14) PTHR31190//PTHR31190:SF21 - FAMILY NOT NAMED // ETHYLENE-RESPONSIVE TRANSCRIPTION FACTOR 13	yes|down
Glyma.13G267300.Wm82.a4.v1		yes|up
Glyma.02G068900.Wm82.a4.v1	(1 of 6) PTHR31062//PTHR31062:SF15 - FAMILY NOT NAMED // XYLOGLUCAN ENDOTRANSGLUCOSYLASE/HYDROLASE PROTEIN 4-RELATED	yes|down
Glyma.20G098451.Wm82.a4.v1	(1 of 74) PF00582 - Universal stress protein family (Usp)	yes|up
Glyma.05G222600.Wm82.a4.v1	(1 of 12) PTHR12374//PTHR12374:SF19 - TRANSCRIPTIONAL ADAPTOR 2 ADA2 -RELATED // SUBFAMILY NOT NAMED	yes|down
Glyma.03G139900.Wm82.a4.v1		yes|down
Glyma.05G244200.Wm82.a4.v1	(1 of 4) PTHR34056//PTHR34056:SF1 - FAMILY NOT NAMED // GENOMIC DNA, CHROMOSOME 3, P1 CLONE: MRC8	yes|down
Glyma.10G022300.Wm82.a4.v1		yes|up
Glyma.17G092800.Wm82.a4.v1	(1 of 9) PTHR23201//PTHR23201:SF18 - EXTENSIN, PROLINE-RICH PROTEIN // SUBFAMILY NOT NAMED	yes|down
Glyma.07G160700.Wm82.a4.v1	(1 of 399) PF00067 - Cytochrome P450 (p450)	yes|down
Glyma.13G152202.Wm82.a4.v1	(1 of 129) KOG0157 - Cytochrome P450 CYP4/CYP19/CYP26 subfamilies	yes|up
Glyma.11G235000.Wm82.a4.v1	(1 of 4) KOG4431 - Uncharacterized protein, induced by hypoxia	yes|down
Glyma.01G233400.Wm82.a4.v1	(1 of 4) PTHR10641//PTHR10641:SF671 - MYB-LIKE DNA-BINDING PROTEIN MYB // SUBFAMILY NOT NAMED	yes|down
Glyma.10G126100.Wm82.a4.v1		yes|down
Glyma.05G095500.Wm82.a4.v1	(1 of 40) PF03763 - Remorin, C-terminal region (Remorin_C)	yes|down
Glyma.18G033900.Wm82.a4.v1	(1 of 11) PTHR11654//PTHR11654:SF128 - OLIGOPEPTIDE TRANSPORTER-RELATED // SUBFAMILY NOT NAMED	yes|down
Glyma.11G221000.Wm82.a4.v1	(1 of 7) KOG0651 - 26S proteasome regulatory complex, ATPase RPT4	yes|down
Glyma.06G020600.Wm82.a4.v1	(1 of 4) PTHR23504:SF36 - MAJOR FACILITATOR PROTEIN	yes|down
Glyma.07G103700.Wm82.a4.v1	(1 of 16) PTHR31415:SF4 - HARPIN-INDUCED PROTEIN-LIKE-RELATED	yes|up
Glyma.18G058800.Wm82.a4.v1	(1 of 5) PTHR23257//PTHR23257:SF391 - SERINE-THREONINE PROTEIN KINASE // MITOGEN-ACTIVATED PROTEIN KINASE KINASE KINASE MOM-4-RELATED	yes|down
Glyma.12G174700.Wm82.a4.v1	(1 of 2) PTHR11132//PTHR11132:SF115 - SOLUTE CARRIER FAMILY 35 // SUBFAMILY NOT NAMED	yes|down
Glyma.15G009600.Wm82.a4.v1	(1 of 65) PF05553 - Cotton fibre expressed protein (DUF761)	yes|down
Glyma.04G064500.Wm82.a4.v1		yes|down
Glyma.20G131100.Wm82.a4.v1	(1 of 2) PTHR23201//PTHR23201:SF15 - EXTENSIN, PROLINE-RICH PROTEIN // GIBBERELLIN-REGULATED PROTEIN 7	yes|down
Glyma.17G164200.Wm82.a4.v1	(1 of 2) PTHR33922:SF4 - EXPRESSED PROTEIN	yes|down
Glyma.02G098200.Wm82.a4.v1	(1 of 5) PTHR22950//PTHR22950:SF327 - AMINO ACID TRANSPORTER // LYSINE HISTIDINE TRANSPORTER-LIKE 6	yes|down
Glyma.01G010200.Wm82.a4.v1	(1 of 2) 2.7.1.19 - Phosphoribulokinase / Phosphopentokinase	yes|down
Glyma.13G113100.Wm82.a4.v1	(1 of 3) PTHR23023//PTHR23023:SF143 - DIMETHYLANILINE MONOOXYGENASE // FLAVIN-CONTAINING MONOOXYGENASE 1-RELATED	yes|up
Glyma.03G019800.Wm82.a4.v1	(1 of 6) K05282 - gibberellin 20-oxidase (E1.14.11.12)	yes|down
Glyma.09G188667.Wm82.a4.v1	(1 of 3) PTHR11814:SF54 - SULFATE TRANSPORTER 3.5-RELATED	yes|down
Glyma.01G195300.Wm82.a4.v1	(1 of 74) PF05678 - VQ motif (VQ)	yes|up
Glyma.06G262400.Wm82.a4.v1	(1 of 57) PF00954//PF01453//PF07714//PF08276 - S-locus glycoprotein domain (S_locus_glycop) // D-mannose binding lectin (B_lectin) // Protein tyrosine kinase (Pkinase_Tyr) // PAN-like domain (PAN_2)	yes|down
Glyma.07G211700.Wm82.a4.v1	(1 of 4) PTHR31722//PTHR31722:SF5 - FAMILY NOT NAMED // EMB|CAB62433.1|-RELATED	yes|up
Glyma.04G172900.Wm82.a4.v1	(1 of 5) PTHR19229//PTHR19229:SF127 - ATP-BINDING CASSETTE TRANSPORTER SUBFAMILY A ABCA // SUBFAMILY NOT NAMED	yes|down
Glyma.13G186000.Wm82.a4.v1	(1 of 3) PTHR31707//PTHR31707:SF21 - FAMILY NOT NAMED // PECTINESTERASE/PECTINESTERASE INHIBITOR 25-RELATED	yes|up
Glyma.10G199000.Wm82.a4.v1	(1 of 5) PTHR22924//PTHR22924:SF39 - LEGHEMOGLOBIN-RELATED // NON-SYMBIOTIC HEMOGLOBIN 2	yes|down
Glyma.07G080500.Wm82.a4.v1	(1 of 5) PTHR10795//PTHR10795:SF387 - PROPROTEIN CONVERTASE SUBTILISIN/KEXIN // SUBTILISIN-LIKE SERINE PROTEASE-RELATED	yes|down
Glyma.14G126500.Wm82.a4.v1	(1 of 6) PTHR10217:SF504 - POTASSIUM CHANNEL AKT1-RELATED	yes|down
Glyma.11G169891.Wm82.a4.v1	(1 of 7) 2.3.3.14 - Homocitrate synthase / Homocitrate synthetase	yes|down
Glyma.17G086700.Wm82.a4.v1		yes|down
Glyma.13G284700.Wm82.a4.v1		yes|down
Glyma.04G066300.Wm82.a4.v1	(1 of 55) K14484 - auxin-responsive protein IAA (IAA)	yes|up
Glyma.02G284300.Wm82.a4.v1	(1 of 4) PTHR31719//PTHR31719:SF5 - FAMILY NOT NAMED // NAC DOMAIN-CONTAINING PROTEIN 6-RELATED	yes|up
Glyma.13G310800.Wm82.a4.v1	(1 of 10) PTHR33264//PTHR33264:SF5 - FAMILY NOT NAMED // EXPRESSED PROTEIN-RELATED	yes|down
Glyma.20G220800.Wm82.a4.v1	(1 of 21) PTHR31238//PTHR31238:SF42 - FAMILY NOT NAMED // GERMIN-LIKE PROTEIN SUBFAMILY 1 MEMBER 10-RELATED	yes|down
Glyma.13G324200.Wm82.a4.v1	(1 of 4) PTHR11850//PTHR11850:SF125 - HOMEOBOX PROTEIN TRANSCRIPTION FACTORS // SUBFAMILY NOT NAMED	yes|down
Glyma.19G212600.Wm82.a4.v1	(1 of 3) PTHR31707:SF25 - PECTINESTERASE/PECTINESTERASE INHIBITOR 39-RELATED	yes|down
Glyma.11G080300.Wm82.a4.v1	(1 of 4) PTHR31235//PTHR31235:SF67 - FAMILY NOT NAMED // PEROXIDASE 64	yes|down
Glyma.19G135900.Wm82.a4.v1	(1 of 3) PTHR18952//PTHR18952:SF118 - CARBONIC ANHYDRASE // ALPHA CARBONIC ANHYDRASE 6	yes|down
Glyma.05G011300.Wm82.a4.v1	(1 of 4) PTHR22891//PTHR22891:SF25 - EUKARYOTIC TRANSLATION INITIATION FACTOR 2C // SUBFAMILY NOT NAMED	yes|down
Glyma.04G015900.Wm82.a4.v1	(1 of 4) 1.2.1.12//1.2.1.13 - Glyceraldehyde-3-phosphate dehydrogenase (phosphorylating) / Triosephosphate dehydrogenase // Glyceraldehyde-3-phosphate dehydrogenase (NADP(+)) (phosphorylating) / Triosephosphate dehydrogenase (NADP+)	yes|down
Glyma.20G246300.Wm82.a4.v1	(1 of 5) PTHR24064:SF113 - INOSITOL TRANSPORTER 1	yes|down
Glyma.10G134700.Wm82.a4.v1	(1 of 56) 3.1.3.2 - Acid phosphatase / Phosphomonoesterase	yes|down
Glyma.12G171700.Wm82.a4.v1	(1 of 3) PTHR10593//PTHR10593:SF45 - SERINE/THREONINE-PROTEIN KINASE RIO // SUBFAMILY NOT NAMED	yes|down
Glyma.03G249100.Wm82.a4.v1	(1 of 74) PF05678 - VQ motif (VQ)	yes|up
Glyma.06G111800.Wm82.a4.v1	(1 of 131) PF00892 - EamA-like transporter family (EamA)	yes|up
Glyma.15G241100.Wm82.a4.v1	(1 of 2) PTHR11746//PTHR11746:SF90 - O-METHYLTRANSFERASE // SUBFAMILY NOT NAMED	yes|down
Glyma.19G099500.Wm82.a4.v1	(1 of 2) PTHR11615//PTHR11615:SF157 - NITRATE, FROMATE, IRON DEHYDROGENASE // SUBFAMILY NOT NAMED	yes|down
Glyma.19G041800.Wm82.a4.v1	(1 of 112) PF13839//PF14416 - GDSL/SGNH-like Acyl-Esterase family found in Pmr5 and Cas1p (PC-Esterase) // PMR5 N terminal Domain (PMR5N)	yes|down
Glyma.03G011200.Wm82.a4.v1	(1 of 4) PTHR31500:SF10 - AT HOOK MOTIF DNA-BINDING FAMILY PROTEIN	yes|down
Glyma.08G091500.Wm82.a4.v1	(1 of 4) PTHR11999//PTHR11999:SF105 - GROUP II PYRIDOXAL-5-PHOSPHATE DECARBOXYLASE // SUBFAMILY NOT NAMED	yes|up
Glyma.10G191700.Wm82.a4.v1	(1 of 154) K00430 - peroxidase (E1.11.1.7)	yes|up
Glyma.09G154700.Wm82.a4.v1	(1 of 4) K08916 - light-harvesting complex II chlorophyll a/b binding protein 5 (LHCB5)	yes|down
Glyma.19G059700.Wm82.a4.v1	(1 of 21) PTHR31238//PTHR31238:SF42 - FAMILY NOT NAMED // GERMIN-LIKE PROTEIN SUBFAMILY 1 MEMBER 10-RELATED	yes|up
Glyma.15G160100.Wm82.a4.v1		yes|up
Glyma.15G026400.Wm82.a4.v1	(1 of 20) K15718 - linoleate 9S-lipoxygenase (LOX1_5)	yes|up
Glyma.14G052400.Wm82.a4.v1		yes|down
Glyma.17G019300.Wm82.a4.v1	(1 of 4) PTHR10638//PTHR10638:SF36 - COPPER AMINE OXIDASE // AMINE OXIDASE-RELATED	yes|down
Glyma.11G077900.Wm82.a4.v1	(1 of 8) PTHR12231:SF112 - RHODANESE-LIKE DOMAIN-CONTAINING PROTEIN 14, CHLOROPLASTIC	yes|down
Glyma.20G041333.Wm82.a4.v1	(1 of 39) PTHR23155//PTHR23155:SF592 - LEUCINE-RICH REPEAT-CONTAINING PROTEIN // SUBFAMILY NOT NAMED	yes|down
Glyma.02G013300.Wm82.a4.v1	(1 of 4) PTHR30620//PTHR30620:SF4 - PERIPLASMIC BETA-GLUCOSIDASE-RELATED // BETA-D-XYLOSIDASE 2-RELATED	yes|down
Glyma.05G053400.Wm82.a4.v1		yes|down
Glyma.04G035600.Wm82.a4.v1	(1 of 7) PTHR24298//PTHR24298:SF172 - FAMILY NOT NAMED // CYTOCHROME P450 82C2-RELATED	yes|up
Glyma.07G196300.Wm82.a4.v1	(1 of 1) PTHR11615//PTHR11615:SF129 - NITRATE, FROMATE, IRON DEHYDROGENASE // SUBFAMILY NOT NAMED	yes|down
Glyma.15G151600.Wm82.a4.v1		yes|up
Glyma.04G172500.Wm82.a4.v1	(1 of 6) PTHR12565//PTHR12565:SF148 - STEROL REGULATORY ELEMENT-BINDING PROTEIN // PROTEIN BANQUO 3	yes|down
Glyma.03G162400.Wm82.a4.v1	(1 of 349) PF00847 - AP2 domain (AP2)	yes|up
Glyma.07G128700.Wm82.a4.v1	(1 of 2) PTHR35133:SF1 - EFFECTOR OF TRANSCRIPTION2-RELATED	yes|down
Glyma.10G047800.Wm82.a4.v1	(1 of 1) PTHR22957//PTHR22957:SF328 - TBC1 DOMAIN FAMILY MEMBER GTPASE-ACTIVATING PROTEIN // RABGAP/TBC DOMAIN-CONTAINING PROTEIN	yes|down
Glyma.13G197600.Wm82.a4.v1	(1 of 4) PTHR26402//PTHR26402:SF574 - RESPONSE REGULATOR OF TWO-COMPONENT SYSTEM // SUBFAMILY NOT NAMED	yes|down
Glyma.20G159700.Wm82.a4.v1	(1 of 6) PTHR24282//PTHR24282:SF15 - CYTOCHROME P450 FAMILY MEMBER // CYTOCHROME P450, FAMILY 715, SUBFAMILY A, POLYPEPTIDE 1	yes|up
Glyma.17G152300.Wm82.a4.v1	(1 of 21) PF16913 - Purine nucleobase transmembrane transport (PUNUT)	yes|down
Glyma.10G135500.Wm82.a4.v1		yes|down
Glyma.03G246200.Wm82.a4.v1	(1 of 46) PF00612//PF13178 - IQ calmodulin-binding motif (IQ) // Protein of unknown function (DUF4005) (DUF4005)	yes|down
Glyma.13G132800.Wm82.a4.v1	(1 of 12) PTHR26374//PTHR26374:SF198 - FAMILY NOT NAMED // ZINC FINGER PROTEIN ZAT11	yes|up
Glyma.13G183000.Wm82.a4.v1	(1 of 3) 1.10.3.1//1.14.18.1 - Catechol oxidase / Tyrosinase // Tyrosinase / Tyrosine-dopa oxidase	yes|down
Glyma.13G330800.Wm82.a4.v1	(1 of 3) PTHR11177//PTHR11177:SF186 - CHITINASE // SUBFAMILY NOT NAMED	yes|up
Glyma.03G006200.Wm82.a4.v1	(1 of 2) PTHR22835//PTHR22835:SF117 - ZINC FINGER FYVE DOMAIN CONTAINING PROTEIN // ALPHA-L-FUCOSIDASE 3	yes|down
Glyma.12G080100.Wm82.a4.v1	(1 of 57) K08235 - xyloglucan:xyloglucosyl transferase (E2.4.1.207)	yes|up
Glyma.13G024700.Wm82.a4.v1	(1 of 4) 2.3.3.13//2.3.3.14 - 2-isopropylmalate synthase / Isopropylmalate synthetase // Homocitrate synthase / Homocitrate synthetase	yes|down
Glyma.15G220600.Wm82.a4.v1	(1 of 2) PTHR32133:SF127 - F-BOX ASSOCIATED UBIQUITINATION EFFECTOR FAMILY PROTEIN-RELATED	yes|down
Glyma.11G152000.Wm82.a4.v1		yes|up
Glyma.09G255000.Wm82.a4.v1	(1 of 4) PTHR11751:SF284 - 1-AMINOCYCLOPROPANE-1-CARBOXYLATE SYNTHASE-LIKE PROTEIN 1	yes|up
Glyma.01G175200.Wm82.a4.v1	(1 of 4) PTHR14255//PTHR14255:SF11 - ATP-DEPENDENT PROTEASE CEREBLON // SUBFAMILY NOT NAMED	yes|down
Glyma.15G253700.Wm82.a4.v1	(1 of 2) K03541 - photosystem II 10kDa protein (psbR)	yes|down
Glyma.19G174000.Wm82.a4.v1	(1 of 12) PTHR26374//PTHR26374:SF198 - FAMILY NOT NAMED // ZINC FINGER PROTEIN ZAT11	yes|up
Glyma.15G124700.Wm82.a4.v1	(1 of 9) 1.16.1.7 - Ferric-chelate reductase (NADH) / NADH:Fe(3+)-EDTA reductase	yes|down
Glyma.02G005600.Wm82.a4.v1	(1 of 4) PTHR10641//PTHR10641:SF650 - MYB-LIKE DNA-BINDING PROTEIN MYB // SUBFAMILY NOT NAMED	yes|up
Glyma.06G151900.Wm82.a4.v1	(1 of 6) PTHR11183:SF56 - UDP-GLUCURONATE:XYLAN ALPHA-GLUCURONOSYLTRANSFERASE 3-RELATED	yes|down
Glyma.06G085000.Wm82.a4.v1	(1 of 3) K11159 - carotenoid cleavage dioxygenase (K11159)	yes|up
Glyma.14G015300.Wm82.a4.v1	(1 of 108) 3.6.3.44 - Xenobiotic-transporting ATPase / Steroid-transporting ATPase	yes|down
Glyma.05G128400.Wm82.a4.v1		yes|down
Glyma.09G282700.Wm82.a4.v1	(1 of 3) K15402 - fatty acid omega-hydroxylase (CYP86B1)	yes|down
Glyma.04G112800.Wm82.a4.v1	(1 of 2) K08905 - photosystem I subunit V (psaG)	yes|down
Glyma.17G002800.Wm82.a4.v1	(1 of 171) PF02365 - No apical meristem (NAM) protein (NAM)	yes|down
Glyma.13G255800.Wm82.a4.v1	(1 of 8) 2.4.1.91 - Flavonol 3-O-glucosyltransferase / UDP-glucose flavonol 3-O-glucosyltransferase	yes|down
Glyma.13G312800.Wm82.a4.v1	(1 of 4) PTHR22849//PTHR22849:SF0 - WDSAM1 PROTEIN // WD REPEAT, SAM AND U-BOX DOMAIN-CONTAINING PROTEIN 1	yes|up
Glyma.07G253600.Wm82.a4.v1	(1 of 4) PTHR31621//PTHR31621:SF1 - FAMILY NOT NAMED // DUF679 DOMAIN MEMBRANE PROTEIN 1	yes|up
Glyma.07G073800.Wm82.a4.v1	(1 of 11) K15095 - (+)-neomenthol dehydrogenase (E1.1.1.208)	yes|down
Glyma.20G114200.Wm82.a4.v1	(1 of 3) K00487 - trans-cinnamate 4-monooxygenase (CYP73A)	yes|up
Glyma.06G242900.Wm82.a4.v1		yes|down
Glyma.10G293500.Wm82.a4.v1	(1 of 2) 2.2.1.1//2.2.1.2 - Transketolase / Glycoaldehyde transferase // Transaldolase / Glycerone transferase	yes|down
Glyma.11G224266.Wm82.a4.v1	(1 of 5) PF00854//PF07690 - POT family (PTR2) // Major Facilitator Superfamily (MFS_1)	yes|down
Glyma.04G188700.Wm82.a4.v1	(1 of 6) K02358 - elongation factor Tu (tuf, TUFM)	yes|down
Glyma.14G003400.Wm82.a4.v1	(1 of 2) K08909 - light-harvesting complex I chlorophyll a/b binding protein 3 (LHCA3)	yes|down
Glyma.12G199400.Wm82.a4.v1	(1 of 2) 1.10.9.1 - Plastoquinol--plastocyanin reductase / Cytochrome b6f complex	yes|down
Glyma.16G104800.Wm82.a4.v1		yes|up
Glyma.20G237700.Wm82.a4.v1	(1 of 8) PTHR10992//PTHR10992:SF907 - ALPHA/BETA HYDROLASE FOLD-CONTAINING PROTEIN // ALPHA/BETA-HYDROLASES SUPERFAMILY PROTEIN	yes|up
Glyma.17G073400.Wm82.a4.v1	(1 of 6) PTHR33021//PTHR33021:SF8 - FAMILY NOT NAMED // EARLY NODULIN-LIKE PROTEIN 1-RELATED	yes|down
Glyma.02G248000.Wm82.a4.v1	(1 of 11) PTHR10774//PTHR10774:SF58 - EXTENDED SYNAPTOTAGMIN-RELATED // SUBFAMILY NOT NAMED	yes|up
Glyma.11G140700.Wm82.a4.v1		yes|down
Glyma.15G139400.Wm82.a4.v1		yes|down
Glyma.17G179400.Wm82.a4.v1	(1 of 20) PTHR23155//PTHR23155:SF543 - LEUCINE-RICH REPEAT-CONTAINING PROTEIN // SUBFAMILY NOT NAMED	yes|up
Glyma.07G126600.Wm82.a4.v1	(1 of 5) 1.13.99.1 - Inositol oxygenase / Myo-inositol oxygenase	yes|up
Glyma.02G119300.Wm82.a4.v1		yes|down
Glyma.06G051900.Wm82.a4.v1	(1 of 12) PTHR12374//PTHR12374:SF19 - TRANSCRIPTIONAL ADAPTOR 2 ADA2 -RELATED // SUBFAMILY NOT NAMED	yes|up
Glyma.16G014500.Wm82.a4.v1		yes|down
Glyma.02G155902.Wm82.a4.v1		yes|up
Glyma.14G203900.Wm82.a4.v1	(1 of 7) PTHR31867:SF22 - EXPANSIN-A8	yes|down
Glyma.08G251800.Wm82.a4.v1	(1 of 27) PF07734 - F-box associated (FBA_1)	yes|down
Glyma.10G056200.Wm82.a4.v1	(1 of 155) K14488 - SAUR family protein (SAUR)	yes|down
Glyma.14G045000.Wm82.a4.v1	(1 of 5) PTHR30620//PTHR30620:SF51 - PERIPLASMIC BETA-GLUCOSIDASE-RELATED // BETA-D-GLUCAN EXOHYDROLASE-LIKE PROTEIN-RELATED	yes|down
Glyma.13G323800.Wm82.a4.v1	(1 of 5) K02575 - MFS transporter, NNP family, nitrate/nitrite transporter (NRT, narK, nrtP, nasA)	yes|up
Glyma.19G009000.Wm82.a4.v1	(1 of 3) 1.2.1.2 - Formate dehydrogenase	yes|down
Glyma.03G102000.Wm82.a4.v1		yes|down
Glyma.11G238500.Wm82.a4.v1	(1 of 8) K17469 - sulfate transporter 2, low-affinity (SULTR2)	yes|down
Glyma.02G059600.Wm82.a4.v1	(1 of 3) PTHR10891//PTHR10891:SF568 - EF-HAND CALCIUM-BINDING DOMAIN CONTAINING PROTEIN // CALCIUM-BINDING PROTEIN CML41-RELATED	yes|down
Glyma.19G105500.Wm82.a4.v1	(1 of 5) PF06839 - GRF zinc finger (zf-GRF)	yes|down
Glyma.07G186000.Wm82.a4.v1	(1 of 8) K00826 - branched-chain amino acid aminotransferase (E2.6.1.42, ilvE)	yes|up
Glyma.05G184600.Wm82.a4.v1	(1 of 1) PTHR24073//PTHR24073:SF462//PTHR24073:SF589 - FAMILY NOT NAMED // RAS-RELATED PROTEIN RABG1-RELATED // RAS-RELATED PROTEIN RABG3B-RELATED	yes|down
Glyma.17G050400.Wm82.a4.v1	(1 of 5) K03026 - DNA-directed RNA polymerase III subunit RPC4 (RPC4, POLR3D)	yes|down
Glyma.05G233900.Wm82.a4.v1	(1 of 4) PTHR24115:SF477 - KINESIN-LIKE PROTEIN-RELATED	yes|down
Glyma.08G038600.Wm82.a4.v1	(1 of 4) PTHR23023//PTHR23023:SF108 - DIMETHYLANILINE MONOOXYGENASE // SUBFAMILY NOT NAMED	yes|down
Glyma.09G201200.Wm82.a4.v1	(1 of 1) PTHR11695:SF497 - CINNAMYL ALCOHOL DEHYDROGENASE 6-RELATED	yes|down
Glyma.04G049500.Wm82.a4.v1	(1 of 3) PTHR11850:SF64 - HOMEOBOX PROTEIN KNOTTED-1-LIKE 1	yes|down
Glyma.03G029400.Wm82.a4.v1	(1 of 7) PTHR31707:SF11 - PECTINESTERASE/PECTINESTERASE INHIBITOR 17-RELATED	yes|up
Glyma.13G240500.Wm82.a4.v1	(1 of 4) 3.5.2.5 - Allantoinase	yes|down
Glyma.12G043800.Wm82.a4.v1	(1 of 3) PTHR32227:SF16 - GLUCAN ENDO-1,3-BETA-GLUCOSIDASE 7-RELATED	yes|down
Glyma.09G185500.Wm82.a4.v1	(1 of 8) PF00257 - Dehydrin (Dehydrin)	yes|down
Glyma.02G285600.Wm82.a4.v1	(1 of 2) PTHR21535//PTHR21535:SF50 - MAGNESIUM AND COBALT TRANSPORT PROTEIN/MITOCHONDRIAL IMPORT INNER MEMBRANE TRANSLOCASE SUBUNIT TIM8 // SUBFAMILY NOT NAMED	yes|down
Glyma.10G017100.Wm82.a4.v1	(1 of 3) PTHR31707:SF25 - PECTINESTERASE/PECTINESTERASE INHIBITOR 39-RELATED	yes|down
Glyma.16G205000.Wm82.a4.v1	(1 of 14) PF07279 - Protein of unknown function (DUF1442) (DUF1442)	yes|up
Glyma.15G045000.Wm82.a4.v1	(1 of 8) PF02451 - Nodulin (Nodulin)	yes|down
Glyma.20G131700.Wm82.a4.v1	(1 of 11) PF03242 - Late embryogenesis abundant protein (LEA_3)	yes|up
Glyma.03G199000.Wm82.a4.v1	(1 of 4) PTHR31140//PTHR31140:SF2 - FAMILY NOT NAMED // B3 DOMAIN-CONTAINING TRANSCRIPTION FACTOR VAL3	yes|down
Glyma.16G212300.Wm82.a4.v1	(1 of 50) PTHR11017//PTHR11017:SF171 - LEUCINE-RICH REPEAT-CONTAINING PROTEIN // SUBFAMILY NOT NAMED	yes|down
Glyma.13G113500.Wm82.a4.v1	(1 of 4) PTHR31374//PTHR31374:SF22 - FAMILY NOT NAMED // AUXIN-RESPONSIVE PROTEIN-LIKE PROTEIN-RELATED	yes|down
Glyma.01G164500.Wm82.a4.v1	(1 of 31) PF04783 - Protein of unknown function (DUF630) (DUF630)	yes|down
Glyma.07G144100.Wm82.a4.v1	(1 of 120) PF00560//PF08263//PF13855 - Leucine Rich Repeat (LRR_1) // Leucine rich repeat N-terminal domain (LRRNT_2) // Leucine rich repeat (LRR_8)	yes|down
Glyma.17G008500.Wm82.a4.v1		yes|down
Glyma.11G169473.Wm82.a4.v1	(1 of 11) 2.3.3.13 - 2-isopropylmalate synthase / Isopropylmalate synthetase	yes|down
Glyma.17G043200.Wm82.a4.v1	(1 of 4) PTHR13683:SF296 - ASPARTYL PROTEASE FAMILY PROTEIN	yes|down
Glyma.01G032300.Wm82.a4.v1		yes|up
Glyma.11G233400.Wm82.a4.v1	(1 of 4) PTHR11709:SF22 - LACCASE-12-RELATED	yes|down
Glyma.01G012000.Wm82.a4.v1	(1 of 2) PTHR23155//PTHR23155:SF599 - LEUCINE-RICH REPEAT-CONTAINING PROTEIN // SUBFAMILY NOT NAMED	yes|down
Glyma.13G213200.Wm82.a4.v1	(1 of 10) K08145 - MFS transporter, SP family, solute carrier family 2 (facilitated glucose transporter), member 8 (SLC2A8, GLUT8)	yes|down
Glyma.15G111900.Wm82.a4.v1	(1 of 4) PTHR11850//PTHR11850:SF100 - HOMEOBOX PROTEIN TRANSCRIPTION FACTORS // HOMEOBOX PROTEIN SHOOT MERISTEMLESS	yes|down
Glyma.16G062000.Wm82.a4.v1	(1 of 3) PF13418//PF13964 - Galactose oxidase, central domain (Kelch_4) // Kelch motif (Kelch_6)	yes|down
Glyma.15G100100.Wm82.a4.v1	(1 of 2227) 2.7.11.1 - Non-specific serine/threonine protein kinase / Threonine-specific protein kinase	yes|up
Glyma.02G226500.Wm82.a4.v1	(1 of 14) K07300 - Ca2+:H+ antiporter (chaA, CAX)	yes|down
Glyma.06G100300.Wm82.a4.v1	(1 of 85) PF02298 - Plastocyanin-like domain (Cu_bind_like)	yes|down
Glyma.06G122200.Wm82.a4.v1	(1 of 4) PTHR10791//PTHR10791:SF44 - RAG1-ACTIVATING PROTEIN 1 // BIDIRECTIONAL SUGAR TRANSPORTER SWEET1	yes|down
Glyma.04G187900.Wm82.a4.v1	(1 of 2) PTHR10774//PTHR10774:SF94 - EXTENDED SYNAPTOTAGMIN-RELATED // SUBFAMILY NOT NAMED	yes|down
Glyma.04G070500.Wm82.a4.v1	(1 of 4) PTHR10209//PTHR10209:SF119 - OXIDOREDUCTASE, 2OG-FE II OXYGENASE FAMILY PROTEIN // SUBFAMILY NOT NAMED	yes|up
Glyma.15G102000.Wm82.a4.v1	(1 of 3) PTHR20852//PTHR20852:SF53 - GLUTAMINE SYNTHETASE // GLUTAMINE SYNTHETASE, CHLOROPLASTIC/MITOCHONDRIAL	yes|down
Glyma.10G234600.Wm82.a4.v1	(1 of 6) PTHR24282//PTHR24282:SF15 - CYTOCHROME P450 FAMILY MEMBER // CYTOCHROME P450, FAMILY 715, SUBFAMILY A, POLYPEPTIDE 1	yes|up
Glyma.15G092900.Wm82.a4.v1		yes|down
Glyma.20G158500.Wm82.a4.v1	(1 of 4) PTHR33836:SF1 - ARM REPEAT SUPERFAMILY PROTEIN-RELATED	yes|down
Glyma.12G200600.Wm82.a4.v1	(1 of 36) PF12609 - Wound-induced protein (DUF3774)	yes|up
Glyma.01G028300.Wm82.a4.v1	(1 of 6) PTHR11850//PTHR11850:SF101 - HOMEOBOX PROTEIN TRANSCRIPTION FACTORS // SUBFAMILY NOT NAMED	yes|down
Glyma.14G001100.Wm82.a4.v1	(1 of 7) PTHR18966//PTHR18966:SF222 - IONOTROPIC GLUTAMATE RECEPTOR // GLUTAMATE RECEPTOR 3.1-RELATED	yes|down
Glyma.07G098700.Wm82.a4.v1		yes|up
Glyma.10G021300.Wm82.a4.v1	(1 of 4) PTHR10168//PTHR10168:SF57 - GLUTAREDOXIN // GLUTAREDOXIN-C13-RELATED	yes|down
Glyma.15G199700.Wm82.a4.v1	(1 of 4) PF02095 - Extensin-like protein repeat (Extensin_1)	yes|down
Glyma.09G179800.Wm82.a4.v1	(1 of 5) PTHR22814:SF34 - COPPER TRANSPORT PROTEIN-RELATED	yes|up
Glyma.07G047600.Wm82.a4.v1	(1 of 5) K08908 - light-harvesting complex I chlorophyll a/b binding protein 2 (LHCA2)	yes|down
Glyma.12G218651.Wm82.a4.v1		yes|down
Glyma.14G035100.Wm82.a4.v1		yes|down
Glyma.11G049400.Wm82.a4.v1		yes|down
Glyma.05G121600.Wm82.a4.v1	(1 of 10) PTHR31851:SF6 - VACUOLAR IRON TRANSPORTER HOMOLOG 2.1	yes|down
Glyma.12G219300.Wm82.a4.v1	(1 of 2) K08914 - light-harvesting complex II chlorophyll a/b binding protein 3 (LHCB3)	yes|down
Glyma.17G147400.Wm82.a4.v1	(1 of 12) PTHR31692:SF10 - EXPANSIN-LIKE B1	yes|up
Glyma.11G025200.Wm82.a4.v1	(1 of 4) PTHR31775:SF5 - REMORIN FAMILY PROTEIN-RELATED	yes|down
Glyma.20G206000.Wm82.a4.v1		yes|down
Glyma.04G105900.Wm82.a4.v1	(1 of 32) 1.13.11.58 - Linoleate 9S-lipoxygenase / Linoleate 9-lipoxygenase	yes|up
Glyma.01G190402.Wm82.a4.v1	(1 of 7) 1.14.13.89 - Isoflavone 2'-hydroxylase / Isoflavone 2'-monooxygenase	yes|down
Glyma.20G124200.Wm82.a4.v1	(1 of 80) PF14009 - Domain of unknown function (DUF4228) (DUF4228)	yes|up
Glyma.07G124400.Wm82.a4.v1	(1 of 2) K06892 - feruloyl-CoA ortho-hydroxylase (F6H1)	yes|up
Glyma.05G051300.Wm82.a4.v1	(1 of 4) PTHR31032//PTHR31032:SF1 - FAMILY NOT NAMED // PGR5-LIKE PROTEIN 1A, CHLOROPLASTIC-RELATED	yes|down
Glyma.08G132700.Wm82.a4.v1	(1 of 2) PTHR21327:SF11 - MONOFUNCTIONAL RIBOFLAVIN BIOSYNTHESIS PROTEIN RIBA 2, CHLOROPLASTIC	yes|down
Glyma.03G025200.Wm82.a4.v1	(1 of 48) 3.2.1.14 - Chitinase / Poly-beta-glucosaminidase	yes|up
Glyma.18G185900.Wm82.a4.v1		yes|down
Glyma.04G018800.Wm82.a4.v1	(1 of 60) PF03087 - Arabidopsis protein of unknown function (DUF241)	yes|down
Glyma.15G067200.Wm82.a4.v1	(1 of 4) PTHR23315:SF56 - ARMADILLO/BETA-CATENIN-LIKE REPEAT-CONTAINING PROTEIN	yes|down
Glyma.13G120500.Wm82.a4.v1	(1 of 4) K13407 - fatty acid omega-hydroxylase (CYP94A1)	yes|down
Glyma.08G245600.Wm82.a4.v1	(1 of 9) K01180 - endo-1,3(4)-beta-glucanase (E3.2.1.6)	yes|down
Glyma.11G075000.Wm82.a4.v1	(1 of 2) PTHR10374//PTHR10374:SF23 - LACTOYLGLUTATHIONE LYASE GLYOXALASE I // SUBFAMILY NOT NAMED	yes|down
Glyma.10G156600.Wm82.a4.v1	(1 of 4) PTHR11969//PTHR11969:SF26 - MAX DIMERIZATION, MAD // TRANSCRIPTION FACTOR BHLH99	yes|down
Glyma.09G277500.Wm82.a4.v1	(1 of 8) PTHR33257//PTHR33257:SF5 - FAMILY NOT NAMED // EXPRESSED PROTEIN	yes|up
Glyma.16G172500.Wm82.a4.v1	(1 of 5) K05666 - ATP-binding cassette, subfamily C (CFTR/MRP), member 2 (ABCC2)	yes|down
Glyma.08G018000.Wm82.a4.v1	(1 of 3) PTHR11751//PTHR11751:SF380 - SUBGROUP I AMINOTRANSFERASE RELATED // 1-AMINOCYCLOPROPANE-1-CARBOXYLATE SYNTHASE 2-RELATED	yes|up
Glyma.02G124900.Wm82.a4.v1	(1 of 16) 1.14.11.31 - Thebaine 6-O-demethylase	yes|up
Glyma.03G115300.Wm82.a4.v1	(1 of 2) 1.14.13.70 - Sterol 14-alpha-demethylase / Obtusufoliol 14-demethylase	yes|down
Glyma.18G183700.Wm82.a4.v1	(1 of 2) PTHR11709:SF62 - LACCASE-2	yes|down
Glyma.09G179100.Wm82.a4.v1	(1 of 131) PF00892 - EamA-like transporter family (EamA)	yes|up
Glyma.02G157900.Wm82.a4.v1		yes|down
Glyma.01G061000.Wm82.a4.v1		yes|down
Glyma.04G190700.Wm82.a4.v1	(1 of 3) PTHR12411//PTHR12411:SF346 - CYSTEINE PROTEASE FAMILY C1-RELATED // KDEL-TAILED CYSTEINE ENDOPEPTIDASE CEP1-RELATED	yes|up
Glyma.19G120400.Wm82.a4.v1	(1 of 4) 2.3.3.13//2.3.3.14 - 2-isopropylmalate synthase / Isopropylmalate synthetase // Homocitrate synthase / Homocitrate synthetase	yes|down
Glyma.13G361200.Wm82.a4.v1	(1 of 2) PTHR31734:SF34 - AUXIN-RESPONSIVE PROTEIN IAA15	yes|up
Glyma.15G155100.Wm82.a4.v1		yes|up
Glyma.11G193600.Wm82.a4.v1	(1 of 57) K08235 - xyloglucan:xyloglucosyl transferase (E2.4.1.207)	yes|up
Glyma.07G132400.Wm82.a4.v1	(1 of 4) PTHR10641:SF457 - TRANSCRIPTION FACTOR AS1	yes|down
Glyma.02G160900.Wm82.a4.v1	(1 of 5) PTHR22950//PTHR22950:SF240 - AMINO ACID TRANSPORTER // TRANSMEMBRANE AMINO ACID TRANSPORTER-RELATED	yes|down
Glyma.03G139300.Wm82.a4.v1	(1 of 1) PF03016//PF07974 - Exostosin family (Exostosin) // EGF-like domain (EGF_2)	yes|down
Glyma.04G187300.Wm82.a4.v1	(1 of 4) PTHR10641//PTHR10641:SF466 - MYB-LIKE DNA-BINDING PROTEIN MYB // SUBFAMILY NOT NAMED	yes|down
Glyma.20G116700.Wm82.a4.v1		yes|up
Glyma.11G101900.Wm82.a4.v1	(1 of 5) PF00122//PF00689//PF00690//PF00702 - E1-E2 ATPase (E1-E2_ATPase) // Cation transporting ATPase, C-terminus (Cation_ATPase_C) // Cation transporter/ATPase, N-terminus (Cation_ATPase_N) // haloacid dehalogenase-like hydrolase (Hydrolase)	yes|down
Glyma.09G013800.Wm82.a4.v1	(1 of 4) PTHR22814//PTHR22814:SF94 - COPPER TRANSPORT PROTEIN ATOX1-RELATED // SUBFAMILY NOT NAMED	yes|down
Glyma.01G039600.Wm82.a4.v1	(1 of 120) PF00560//PF08263//PF13855 - Leucine Rich Repeat (LRR_1) // Leucine rich repeat N-terminal domain (LRRNT_2) // Leucine rich repeat (LRR_8)	yes|down
Glyma.05G009200.Wm82.a4.v1	(1 of 3) PTHR24351//PTHR24351:SF70 - RIBOSOMAL PROTEIN S6 KINASE // PROTEIN KINASE PINOID 2	yes|down
Glyma.08G076100.Wm82.a4.v1	(1 of 10) PTHR31851:SF6 - VACUOLAR IRON TRANSPORTER HOMOLOG 2.1	yes|up
Glyma.04G028600.Wm82.a4.v1	(1 of 5) PTHR23421//PTHR23421:SF51 - BETA-GALACTOSIDASE RELATED // BETA-GALACTOSIDASE 5	yes|down
Glyma.12G046800.Wm82.a4.v1	(1 of 80) PF14009 - Domain of unknown function (DUF4228) (DUF4228)	yes|down
Glyma.19G218800.Wm82.a4.v1	(1 of 4) PTHR10641:SF494 - TRANSCRIPTION FACTOR MYB108	yes|up
Glyma.03G038500.Wm82.a4.v1	(1 of 154) K00430 - peroxidase (E1.11.1.7)	yes|up
Glyma.13G282000.Wm82.a4.v1	(1 of 2) K08914 - light-harvesting complex II chlorophyll a/b binding protein 3 (LHCB3)	yes|down
Glyma.02G018900.Wm82.a4.v1	(1 of 6) PTHR12565//PTHR12565:SF148 - STEROL REGULATORY ELEMENT-BINDING PROTEIN // PROTEIN BANQUO 3	yes|down
Glyma.20G159300.Wm82.a4.v1	(1 of 3) 6.2.1.8 - Oxalate--CoA ligase / Oxalyl-CoA synthetase	yes|down
Glyma.16G162400.Wm82.a4.v1	(1 of 6) 4.4.1.4 - Alliin lyase / L-cysteine sulfoxide lyase	yes|down
Glyma.02G153000.Wm82.a4.v1	(1 of 4) PTHR10168//PTHR10168:SF57 - GLUTAREDOXIN // GLUTAREDOXIN-C13-RELATED	yes|down
Glyma.15G034500.Wm82.a4.v1	(1 of 2) PTHR10641//PTHR10641:SF640 - MYB-LIKE DNA-BINDING PROTEIN MYB // TRANSCRIPTION FACTOR MYB46	yes|down
Glyma.02G287100.Wm82.a4.v1		yes|down
Glyma.17G221800.Wm82.a4.v1	(1 of 41) 5.3.4.1 - Protein disulfide-isomerase / S-S rearrangase	yes|down
Glyma.12G092000.Wm82.a4.v1	(1 of 2) K14332 - photosystem I subunit PsaO (psaO)	yes|down
Glyma.06G198100.Wm82.a4.v1	(1 of 5) PTHR23023:SF86 - FLAVIN-CONTAINING MONOOXYGENASE FMO GS-OX-LIKE 8-RELATED	yes|down
Glyma.12G219000.Wm82.a4.v1	(1 of 3) PTHR10217:SF476 - CYCLIC NUCLEOTIDE-GATED ION CHANNEL 4	yes|down
Glyma.20G187400.Wm82.a4.v1	(1 of 6) PTHR19241//PTHR19241:SF261 - ATP-BINDING CASSETTE TRANSPORTER // SUBFAMILY NOT NAMED	yes|down
Glyma.15G005600.Wm82.a4.v1		yes|down
Glyma.08G308000.Wm82.a4.v1	(1 of 9) KOG1619 - Cytochrome b	yes|down
Glyma.13G024900.Wm82.a4.v1	(1 of 11) 2.3.3.13 - 2-isopropylmalate synthase / Isopropylmalate synthetase	yes|down
Glyma.13G252900.Wm82.a4.v1	(1 of 8) PTHR12064//PTHR12064:SF30 - ANCIENT CONSERVED DOMAIN PROTEIN-RELATED // SUBFAMILY NOT NAMED	yes|up
Glyma.17G063900.Wm82.a4.v1	(1 of 2) PTHR23070//PTHR23070:SF17 - BCS1 AAA-TYPE ATPASE // MITOCHONDRIAL CHAPERONE BCS1	yes|down
Glyma.17G146500.Wm82.a4.v1	(1 of 4) PTHR23291//PTHR23291:SF34 - BAX INHIBITOR-RELATED // BAX INHIBITOR 1	yes|down
Glyma.05G147000.Wm82.a4.v1	(1 of 2) 2.1.1.267 - Flavonoid 3',5'-methyltransferase	yes|up
Glyma.04G233500.Wm82.a4.v1	(1 of 2) PTHR14136:SF11 - THYLAKOID LUMENAL 17.4 KDA PROTEIN, CHLOROPLASTIC	yes|down
Glyma.15G014500.Wm82.a4.v1	(1 of 3) PTHR33057:SF29 - F18B13.4 PROTEIN	yes|up
Glyma.18G274500.Wm82.a4.v1	(1 of 273) PF00646 - F-box domain (F-box)	yes|down
Glyma.10G032200.Wm82.a4.v1	(1 of 4) K02721 - photosystem II PsbW protein (psbW)	yes|down
Glyma.04G220700.Wm82.a4.v1	(1 of 5) PTHR11654:SF155 - PROTEIN NRT1/ PTR FAMILY 5.1	yes|down
Glyma.16G060700.Wm82.a4.v1	(1 of 21) PTHR31238//PTHR31238:SF42 - FAMILY NOT NAMED // GERMIN-LIKE PROTEIN SUBFAMILY 1 MEMBER 10-RELATED	yes|up
Glyma.17G176700.Wm82.a4.v1		yes|down
Glyma.14G222700.Wm82.a4.v1	(1 of 2) K01322 - prolyl oligopeptidase [EC:3.4.21.26] (E3.4.21.26, PREP)	yes|up
Glyma.10G132500.Wm82.a4.v1	(1 of 100) PF14368 - Probable lipid transfer (LTP_2)	yes|down
Glyma.08G325600.Wm82.a4.v1	(1 of 4) PTHR13902:SF44 - SERINE/THREONINE-PROTEIN KINASE WNK11-RELATED	yes|down
Glyma.04G020200.Wm82.a4.v1	(1 of 2) 4.1.1.17 - Ornithine decarboxylase / L-ornithine carboxy-lyase	yes|down
Glyma.01G122800.Wm82.a4.v1	(1 of 5) PTHR31503:SF1 - VACUOLAR CATION/PROTON EXCHANGER 1-RELATED	yes|down
Glyma.03G030500.Wm82.a4.v1	(1 of 4) PTHR11177//PTHR11177:SF190 - CHITINASE // SUBFAMILY NOT NAMED	yes|up
Glyma.11G162500.Wm82.a4.v1		yes|down
Glyma.05G232300.Wm82.a4.v1	(1 of 4) PTHR22814//PTHR22814:SF104 - COPPER TRANSPORT PROTEIN ATOX1-RELATED // SUBFAMILY NOT NAMED	yes|down
Glyma.08G076300.Wm82.a4.v1	(1 of 10) PTHR31851:SF6 - VACUOLAR IRON TRANSPORTER HOMOLOG 2.1	yes|down
Glyma.07G268550.Wm82.a4.v1	(1 of 1) PTHR18919//PTHR18919:SF105//PTHR32054//PTHR32054:SF3 - ACETYL-COA C-ACYLTRANSFERASE // SUBFAMILY NOT NAMED // FAMILY NOT NAMED // SUBFAMILY NOT NAMED	yes|down
Glyma.13G117100.Wm82.a4.v1	(1 of 2) PTHR31734//PTHR31734:SF3 - FAMILY NOT NAMED // AUXIN-RESPONSIVE PROTEIN IAA31	yes|down
Glyma.06G231300.Wm82.a4.v1	(1 of 1) PTHR32285//PTHR32285:SF66 - FAMILY NOT NAMED // PROTEIN TRICHOME BIREFRINGENCE-LIKE 31	yes|down
Glyma.12G154300.Wm82.a4.v1		yes|down
Glyma.01G045900.Wm82.a4.v1		yes|up
Glyma.06G159000.Wm82.a4.v1		yes|down
Glyma.16G155200.Wm82.a4.v1	(1 of 5) PTHR12136:SF41 - PLECKSTRIN HOMOLOGY (PH) AND LIPID-BINDING START DOMAIN-CONTAINING PROTEIN	yes|down
Glyma.08G140600.Wm82.a4.v1	(1 of 1) 1.14.13.102//1.14.13.109 - Psoralen synthase // Abieta-7,13-dien-18-ol hydroxylase / CYP720B1	yes|down
Glyma.05G065300.Wm82.a4.v1	(1 of 12) PTHR31692:SF10 - EXPANSIN-LIKE B1	yes|up
Glyma.19G164700.Wm82.a4.v1	(1 of 65) PF05553 - Cotton fibre expressed protein (DUF761)	yes|down
Glyma.10G010400.Wm82.a4.v1	(1 of 4) PTHR10641:SF494 - TRANSCRIPTION FACTOR MYB108	yes|up
Glyma.19G081700.Wm82.a4.v1	(1 of 273) PF00646 - F-box domain (F-box)	yes|up
Glyma.03G159100.Wm82.a4.v1	(1 of 2) PTHR34552:SF1 - PHOTOSYSTEM II REACTION CENTER W PROTEIN, CHLOROPLASTIC	yes|down
Glyma.14G175800.Wm82.a4.v1	(1 of 8) PTHR11926//PTHR11926:SF286 - GLUCOSYL/GLUCURONOSYL TRANSFERASES // SUBFAMILY NOT NAMED	yes|down
Glyma.18G018900.Wm82.a4.v1	(1 of 8) K17469 - sulfate transporter 2, low-affinity (SULTR2)	yes|down
Glyma.19G201500.Wm82.a4.v1	(1 of 12) PTHR31358//PTHR31358:SF10 - FAMILY NOT NAMED // TARGETING PROTEIN FOR XKLP2-LIKE PROTEIN	yes|down
Glyma.12G237367.Wm82.a4.v1	(1 of 6) PTHR11206:SF156 - MATE EFFLUX FAMILY PROTEIN FRD3	yes|up
Glyma.20G134000.Wm82.a4.v1		yes|up
Glyma.16G130400.Wm82.a4.v1	(1 of 6) PTHR27000:SF26 - F10A5.16	yes|down
Glyma.02G016600.Wm82.a4.v1	(1 of 6) PTHR31707:SF38 - PECTINESTERASE/PECTINESTERASE INHIBITOR 20-RELATED	yes|down
Glyma.19G243700.Wm82.a4.v1	(1 of 46) PF00612//PF13178 - IQ calmodulin-binding motif (IQ) // Protein of unknown function (DUF4005) (DUF4005)	yes|down
Glyma.10G013900.Wm82.a4.v1	(1 of 4) PTHR30620//PTHR30620:SF4 - PERIPLASMIC BETA-GLUCOSIDASE-RELATED // BETA-D-XYLOSIDASE 2-RELATED	yes|down
Glyma.05G190100.Wm82.a4.v1	(1 of 24) PF04720 - PDDEXK-like family of unknown function (PDDEXK_6)	yes|up
Glyma.03G137000.Wm82.a4.v1	(1 of 3) K03403 - magnesium chelatase subunit H (chlH, bchH)	yes|down
Glyma.10G135266.Wm82.a4.v1	(1 of 273) PF00646 - F-box domain (F-box)	yes|down
Glyma.02G090100.Wm82.a4.v1	(1 of 3) PTHR11206//PTHR11206:SF167 - MULTIDRUG RESISTANCE PROTEIN // SUBFAMILY NOT NAMED	yes|down
Glyma.08G198900.Wm82.a4.v1	(1 of 9) PF07714//PF12819//PF13855 - Protein tyrosine kinase (Pkinase_Tyr) // Carbohydrate-binding protein of the ER (Malectin_like) // Leucine rich repeat (LRR_8)	yes|up
Glyma.06G102400.Wm82.a4.v1	(1 of 16) KOG0149 - Predicted RNA-binding protein SEB4 (RRM superfamily)	yes|down
Glyma.19G227800.Wm82.a4.v1	(1 of 6) 2.4.1.123 - Inositol 3-alpha-galactosyltransferase / UDP-alpha-D-galactose:myo-inositol 3-alpha-D-galactosyltransferase	yes|down
Glyma.13G116700.Wm82.a4.v1	(1 of 4) PTHR13683:SF296 - ASPARTYL PROTEASE FAMILY PROTEIN	yes|down
Glyma.05G208900.Wm82.a4.v1	(1 of 4) K15398 - fatty acid omega-hydroxylase (CYP86A4S)	yes|down
Glyma.05G130900.Wm82.a4.v1		yes|up
Glyma.05G051400.Wm82.a4.v1	(1 of 5) PTHR10795//PTHR10795:SF369 - PROPROTEIN CONVERTASE SUBTILISIN/KEXIN // SUBFAMILY NOT NAMED	yes|down
Glyma.20G199600.Wm82.a4.v1	(1 of 3) K01703 - 3-isopropylmalate/(R)-2-methylmalate dehydratase large subunit (leuC)	yes|down
Glyma.13G030300.Wm82.a4.v1	(1 of 8) PTHR11771//PTHR11771:SF42 - LIPOXYGENASE // PROTEIN C13C4.7	yes|down
Glyma.18G130900.Wm82.a4.v1	(1 of 8) PTHR26402:SF526 - TWO-COMPONENT RESPONSE REGULATOR ARR15-RELATED	yes|down
Glyma.03G248900.Wm82.a4.v1		yes|up
Glyma.02G159900.Wm82.a4.v1	(1 of 1) PTHR19241//PTHR19241:SF283 - ATP-BINDING CASSETTE TRANSPORTER // SUBFAMILY NOT NAMED	yes|down
Glyma.12G222200.Wm82.a4.v1	(1 of 2) K00218 - protochlorophyllide reductase (E1.3.1.33, por)	yes|down
Glyma.12G173800.Wm82.a4.v1	(1 of 36) PTHR32077//PTHR32077:SF7 - FAMILY NOT NAMED // FASCICLIN-LIKE ARABINOGALACTAN PROTEIN 11	yes|down
Glyma.02G109600.Wm82.a4.v1	(1 of 5) PTHR11615//PTHR11615:SF81 - NITRATE, FROMATE, IRON DEHYDROGENASE // CASPARIAN STRIP MEMBRANE PROTEIN 5	yes|up
Glyma.20G173800.Wm82.a4.v1	(1 of 49) 3.1.3.48 - Protein-tyrosine-phosphatase / PTPase	yes|up
Glyma.06G315400.Wm82.a4.v1	(1 of 25) PF04852 - Protein of unknown function (DUF640) (DUF640)	yes|down
Glyma.13G282400.Wm82.a4.v1	(1 of 36) PF12609 - Wound-induced protein (DUF3774)	yes|up
Glyma.03G118200.Wm82.a4.v1	(1 of 3) K12604 - CCR4-NOT transcription complex subunit 1 (CNOT1, NOT1)	yes|up
Glyma.11G152333.Wm82.a4.v1	(1 of 5) PTHR31301:SF14 - LOB DOMAIN-CONTAINING PROTEIN 1-RELATED	yes|down
Glyma.09G038700.Wm82.a4.v1	(1 of 3) PTHR34804:SF1 - CAMP-REGULATED PHOSPHOPROTEIN 19-RELATED PROTEIN	yes|up
Glyma.02G082700.Wm82.a4.v1	(1 of 8) PTHR11751//PTHR11751:SF126 - SUBGROUP I AMINOTRANSFERASE RELATED // TRYPTOPHAN AMINOTRANSFERASE-RELATED PROTEIN 3-RELATED	yes|up
Glyma.14G038400.Wm82.a4.v1	(1 of 2) PF13637//PF13962 - Ankyrin repeats (many copies) (Ank_4) // Domain of unknown function (PGG)	yes|up
Glyma.18G272100.Wm82.a4.v1	(1 of 4) PTHR31673//PTHR31673:SF2 - FAMILY NOT NAMED // COBRA-LIKE PROTEIN 4	yes|down
Glyma.01G189000.Wm82.a4.v1	(1 of 4) PTHR31444//PTHR31444:SF8 - FAMILY NOT NAMED // PROTEIN IRREGULAR XYLEM 15-RELATED	yes|down
Glyma.02G204500.Wm82.a4.v1	(1 of 6) PTHR33021//PTHR33021:SF8 - FAMILY NOT NAMED // EARLY NODULIN-LIKE PROTEIN 1-RELATED	yes|down
Glyma.13G033900.Wm82.a4.v1	(1 of 73) 3.1.4.46 - Glycerophosphodiester phosphodiesterase / Glycerophosphoryl diester phosphodiesterase	yes|up
Glyma.15G131400.Wm82.a4.v1	(1 of 28) PF07712 - Stress up-regulated Nod 19 (SURNod19)	yes|up
Glyma.10G115500.Wm82.a4.v1	(1 of 32) 1.14.13.121 - Premnaspirodiene oxygenase / Hyoscymus muticus premnaspirodiene oxygenase	yes|up
Glyma.13G364700.Wm82.a4.v1	(1 of 91) 3.2.1.15 - Polygalacturonase / Pectinase	yes|up
Glyma.12G221100.Wm82.a4.v1	(1 of 2) PTHR22953//PTHR22953:SF39 - ACID PHOSPHATASE RELATED // SUBFAMILY NOT NAMED	yes|down
Glyma.10G060100.Wm82.a4.v1	(1 of 2) PTHR20852//PTHR20852:SF16 - GLUTAMINE SYNTHETASE // TYPE-1 GLUTAMINE SYNTHETASE 1	yes|down
Glyma.20G231800.Wm82.a4.v1	(1 of 4) PTHR11969//PTHR11969:SF26 - MAX DIMERIZATION, MAD // TRANSCRIPTION FACTOR BHLH99	yes|down
Glyma.03G073600.Wm82.a4.v1	(1 of 5) PTHR33101:SF1 - ROP GUANINE NUCLEOTIDE EXCHANGE FACTOR 7	yes|down
Glyma.17G117300.Wm82.a4.v1	(1 of 3) PTHR24351//PTHR24351:SF70 - RIBOSOMAL PROTEIN S6 KINASE // PROTEIN KINASE PINOID 2	yes|down
Glyma.17G119400.Wm82.a4.v1	(1 of 4) PTHR22891//PTHR22891:SF25 - EUKARYOTIC TRANSLATION INITIATION FACTOR 2C // SUBFAMILY NOT NAMED	yes|down
Glyma.13G090600.Wm82.a4.v1		yes|down
Glyma.03G077900.Wm82.a4.v1	(1 of 9) PTHR11709:SF103 - LACCASE-16	yes|down
Glyma.06G235900.Wm82.a4.v1	(1 of 5) K00815 - tyrosine aminotransferase (TAT)	yes|down
Glyma.01G025200.Wm82.a4.v1	(1 of 2) PTHR11206//PTHR11206:SF80 - MULTIDRUG RESISTANCE PROTEIN // SUBFAMILY NOT NAMED	yes|down
Glyma.03G162500.Wm82.a4.v1	(1 of 16) K14516 - ethylene-responsive transcription factor 1 (ERF1)	yes|up
Glyma.10G009400.Wm82.a4.v1	(1 of 154) K00430 - peroxidase (E1.11.1.7)	yes|up
Glyma.13G093600.Wm82.a4.v1	(1 of 6) KOG1187//KOG2345 - Serine/threonine protein kinase // Serine/threonine protein kinase/TGF-beta stimulated factor	yes|down
Glyma.02G064700.Wm82.a4.v1	(1 of 2) K08907 - light-harvesting complex I chlorophyll a/b binding protein 1 (LHCA1)	yes|down
Glyma.16G150300.Wm82.a4.v1	(1 of 6) PTHR31062//PTHR31062:SF15 - FAMILY NOT NAMED // XYLOGLUCAN ENDOTRANSGLUCOSYLASE/HYDROLASE PROTEIN 4-RELATED	yes|down
Glyma.06G015900.Wm82.a4.v1	(1 of 4) 1.2.1.12//1.2.1.13 - Glyceraldehyde-3-phosphate dehydrogenase (phosphorylating) / Triosephosphate dehydrogenase // Glyceraldehyde-3-phosphate dehydrogenase (NADP(+)) (phosphorylating) / Triosephosphate dehydrogenase (NADP+)	yes|down
Glyma.13G267500.Wm82.a4.v1	(1 of 176) PF03106 - WRKY DNA -binding domain (WRKY)	yes|up
Glyma.07G185200.Wm82.a4.v1	(1 of 37) PF04749 - PLAC8 family (PLAC8)	yes|down
Glyma.12G021300.Wm82.a4.v1	(1 of 122) 3.2.1.39 - Glucan endo-1,3-beta-D-glucosidase / Laminarinase	yes|up
Glyma.02G299300.Wm82.a4.v1	(1 of 4) PTHR31321//PTHR31321:SF31 - FAMILY NOT NAMED // PECTINESTERASE QRT1	yes|down
Glyma.14G115500.Wm82.a4.v1	(1 of 4) PTHR31731//PTHR31731:SF19 - FAMILY NOT NAMED // BIFUNCTIONAL INHIBITOR/LIPID-TRANSFER PROTEIN/SEED STORAGE 2S ALBUMIN SUPERFAMILY PROTEIN	yes|down
Glyma.19G245500.Wm82.a4.v1	(1 of 2) PF00187//PF00967 - Chitin recognition protein (Chitin_bind_1) // Barwin family (Barwin)	yes|down
Glyma.06G157200.Wm82.a4.v1	(1 of 1) PTHR23421//PTHR23421:SF67 - BETA-GALACTOSIDASE RELATED // BETA-GALACTOSIDASE 10	yes|down
Glyma.06G005000.Wm82.a4.v1	(1 of 18) KOG2922 - Uncharacterized conserved protein	yes|down
Glyma.11G061300.Wm82.a4.v1	(1 of 4) K02716 - photosystem II oxygen-evolving enhancer protein 1 (psbO)	yes|down
Glyma.11G174100.Wm82.a4.v1	(1 of 8) K10257 - omega-3 fatty acid desaturase (delta-15 desaturase) (FAD8, desB)	yes|down
Glyma.10G176700.Wm82.a4.v1	(1 of 13) 2.1.1.150 - Isoflavone 7-O-methyltransferase	yes|up
Glyma.13G331200.Wm82.a4.v1	(1 of 5) PTHR31964//PTHR31964:SF16 - FAMILY NOT NAMED // ADENINE NUCLEOTIDE ALPHA HYDROLASES-LIKE PROTEIN	yes|down
Glyma.02G171600.Wm82.a4.v1	(1 of 4) PTHR31388//PTHR31388:SF8 - FAMILY NOT NAMED // PEROXIDASE 53-RELATED	yes|down
Glyma.02G002000.Wm82.a4.v1	(1 of 3) K12502 - MPBQ/MSBQ methyltransferase (VTE3, APG1)	yes|down
Glyma.09G260500.Wm82.a4.v1	(1 of 14) PF00228 - Bowman-Birk serine protease inhibitor family (Bowman-Birk_leg)	yes|down
Glyma.06G005100.Wm82.a4.v1	(1 of 2) PTHR11071:SF264 - PEPTIDYL-PROLYL CIS-TRANS ISOMERASE CYP19-1	yes|down
Glyma.15G184100.Wm82.a4.v1	(1 of 5) PTHR31707//PTHR31707:SF39 - FAMILY NOT NAMED // PECTINESTERASE/PECTINESTERASE INHIBITOR 12-RELATED	yes|down
Glyma.02G046800.Wm82.a4.v1	(1 of 3) PTHR11607//PTHR11607:SF18 - ALPHA-MANNOSIDASE // ALPHA-MANNOSIDASE	yes|down
Glyma.12G136100.Wm82.a4.v1	(1 of 4) PTHR32116//PTHR32116:SF24 - FAMILY NOT NAMED // GALACTURONOSYLTRANSFERASE 12-RELATED	yes|down
Glyma.02G044200.Wm82.a4.v1	(1 of 2) PF03171//PF13640 - 2OG-Fe(II) oxygenase superfamily (2OG-FeII_Oxy) // 2OG-Fe(II) oxygenase superfamily (2OG-FeII_Oxy_3)	yes|down
Glyma.05G068800.Wm82.a4.v1	(1 of 157) PF04043 - Plant invertase/pectin methylesterase inhibitor (PMEI)	yes|down
Glyma.06G225500.Wm82.a4.v1	(1 of 5) PTHR13301//PTHR13301:SF28 - X-BOX TRANSCRIPTION FACTOR-RELATED // SUBFAMILY NOT NAMED	yes|down
Glyma.01G127100.Wm82.a4.v1	(1 of 13) PTHR21495//PTHR21495:SF77 - NUCLEOPORIN-RELATED // DIRIGENT PROTEIN 19	yes|down
Glyma.09G064200.Wm82.a4.v1	(1 of 4) PTHR12565//PTHR12565:SF180 - STEROL REGULATORY ELEMENT-BINDING PROTEIN // SUBFAMILY NOT NAMED	yes|up
Glyma.15G260600.Wm82.a4.v1	(1 of 17) PTHR13683:SF298 - ASPARTIC PROTEINASE CDR1-RELATED	yes|down
Glyma.08G037000.Wm82.a4.v1	(1 of 2) PTHR22849//PTHR22849:SF13 - WDSAM1 PROTEIN // SUBFAMILY NOT NAMED	yes|down
Glyma.01G184600.Wm82.a4.v1	(1 of 20) PF04784//PF14389 - Protein of unknown function, DUF547 (DUF547) // Leucine-zipper of ternary complex factor MIP1 (Lzipper-MIP1)	yes|down
Glyma.13G152814.Wm82.a4.v1	(1 of 12) 2.5.1.36 - Trihydroxypterocarpan dimethylallyltransferase / Glyceollin synthase	yes|up
Glyma.01G209700.Wm82.a4.v1		yes|down
Glyma.18G247100.Wm82.a4.v1	(1 of 9) PTHR11926//PTHR11926:SF331 - GLUCOSYL/GLUCURONOSYL TRANSFERASES // SUBFAMILY NOT NAMED	yes|down
Glyma.04G088200.Wm82.a4.v1	(1 of 4) PTHR22950//PTHR22950:SF278 - AMINO ACID TRANSPORTER // AMINO ACID PERMEASE 1-RELATED	yes|down
Glyma.04G100600.Wm82.a4.v1	(1 of 16) KOG0149 - Predicted RNA-binding protein SEB4 (RRM superfamily)	yes|down
Glyma.07G111300.Wm82.a4.v1	(1 of 65) PF03140 - Plant protein of unknown function (DUF247)	yes|down
Glyma.18G063200.Wm82.a4.v1	(1 of 14) K07300 - Ca2+:H+ antiporter (chaA, CAX)	yes|down
Glyma.11G157200.Wm82.a4.v1	(1 of 7) PTHR10891//PTHR10891:SF590 - EF-HAND CALCIUM-BINDING DOMAIN CONTAINING PROTEIN // SUBFAMILY NOT NAMED	yes|up
Glyma.17G017400.Wm82.a4.v1	(1 of 1) PF01715//PF01745 - IPP transferase (IPPT) // Isopentenyl transferase (IPT)	yes|up
Glyma.01G168400.Wm82.a4.v1	(1 of 2) PTHR10374//PTHR10374:SF23 - LACTOYLGLUTATHIONE LYASE GLYOXALASE I // SUBFAMILY NOT NAMED	yes|down
Glyma.01G179400.Wm82.a4.v1	(1 of 32) 1.14.13.121 - Premnaspirodiene oxygenase / Hyoscymus muticus premnaspirodiene oxygenase	yes|down
Glyma.01G078300.Wm82.a4.v1	(1 of 20) PTHR24298:SF86 - CYTOCHROME P450 71B21-RELATED	yes|down
Glyma.05G230200.Wm82.a4.v1	(1 of 5) PTHR10460//PTHR10460:SF11 - ABL INTERACTOR // SUBFAMILY NOT NAMED	yes|down
Glyma.19G228400.Wm82.a4.v1	(1 of 5) 2.5.1.43 - Nicotianamine synthase	yes|up
Glyma.14G221500.Wm82.a4.v1	(1 of 5) PTHR31867//PTHR31867:SF4 - FAMILY NOT NAMED // EXPANSIN-A11	yes|up
Glyma.10G136700.Wm82.a4.v1	(1 of 273) PF00646 - F-box domain (F-box)	yes|down
Glyma.01G037100.Wm82.a4.v1	(1 of 3) 3.4.24.65 - Macrophage elastase / Metalloelastase	yes|down
Glyma.15G057400.Wm82.a4.v1		yes|down
Glyma.05G230700.Wm82.a4.v1	(1 of 18) K17710 - pentatricopeptide repeat domain-containing protein 1 (PTCD1)	yes|down
Glyma.11G206400.Wm82.a4.v1	(1 of 32) PF00069//PF01657 - Protein kinase domain (Pkinase) // Salt stress response/antifungal (Stress-antifung)	yes|up
Glyma.07G013700.Wm82.a4.v1	(1 of 9) PF07714//PF12819//PF13855 - Protein tyrosine kinase (Pkinase_Tyr) // Carbohydrate-binding protein of the ER (Malectin_like) // Leucine rich repeat (LRR_8)	yes|up
Glyma.17G140300.Wm82.a4.v1	(1 of 8) PTHR31731//PTHR31731:SF7 - FAMILY NOT NAMED // BIFUNCTIONAL INHIBITOR/LIPID-TRANSFER PROTEIN/SEED STORAGE 2S ALBUMIN SUPERFAMILY PROTEIN	yes|down
Glyma.17G248700.Wm82.a4.v1	(1 of 11) KOG2966 - Uncharacterized conserved protein	yes|down
Glyma.01G095000.Wm82.a4.v1	(1 of 21) PTHR33107:SF5 - KUNITZ FAMILY TRYPSIN AND PROTEASE INHIBITOR PROTEIN-RELATED	yes|down
Glyma.16G080100.Wm82.a4.v1	(1 of 3) PTHR31942//PTHR31942:SF13 - FAMILY NOT NAMED // MLO-LIKE PROTEIN 15	yes|up
Glyma.05G069701.Wm82.a4.v1	(1 of 21) PF16913 - Purine nucleobase transmembrane transport (PUNUT)	yes|down
Glyma.01G184900.Wm82.a4.v1		yes|down
Glyma.09G139000.Wm82.a4.v1	(1 of 4) PTHR10641:SF563 - MYB TRANSCRIPTION FACTOR-RELATED	yes|up
Glyma.07G018000.Wm82.a4.v1	(1 of 5) PTHR19139//PTHR19139:SF99 - AQUAPORIN TRANSPORTER // AQUAPORIN TIP2-1	yes|down
Glyma.11G035700.Wm82.a4.v1	(1 of 4) PTHR10209//PTHR10209:SF214 - OXIDOREDUCTASE, 2OG-FE II OXYGENASE FAMILY PROTEIN // SUBFAMILY NOT NAMED	yes|down
Glyma.15G260900.Wm82.a4.v1	(1 of 8) PF02451 - Nodulin (Nodulin)	yes|down
Glyma.11G024100.Wm82.a4.v1	(1 of 4) PTHR11592//PTHR11592:SF42 - GLUTATHIONE PEROXIDASE // SUBFAMILY NOT NAMED	yes|down
Glyma.13G104700.Wm82.a4.v1	(1 of 7) PTHR13878//PTHR13878:SF14 - GULONOLACTONE OXIDASE // SUBFAMILY NOT NAMED	yes|down
Glyma.06G276400.Wm82.a4.v1	(1 of 19) 1.13.11.19 - Cysteamine dioxygenase / Persulfurase	yes|down
Glyma.19G229500.Wm82.a4.v1	(1 of 19) PF07887 - Calmodulin binding protein-like (Calmodulin_bind)	yes|up
Glyma.13G356000.Wm82.a4.v1	(1 of 5) PTHR19139//PTHR19139:SF99 - AQUAPORIN TRANSPORTER // AQUAPORIN TIP2-1	yes|down
Glyma.16G064200.Wm82.a4.v1	(1 of 78) PF00069//PF00560//PF08263//PF13855 - Protein kinase domain (Pkinase) // Leucine Rich Repeat (LRR_1) // Leucine rich repeat N-terminal domain (LRRNT_2) // Leucine rich repeat (LRR_8)	yes|down
Glyma.08G102100.Wm82.a4.v1	(1 of 4) K00059 - 3-oxoacyl- (fabG)	yes|down
Glyma.13G322500.Wm82.a4.v1	(1 of 57) K08235 - xyloglucan:xyloglucosyl transferase (E2.4.1.207)	yes|up
Glyma.12G235800.Wm82.a4.v1	(1 of 8) PF00257 - Dehydrin (Dehydrin)	yes|down
Glyma.13G098000.Wm82.a4.v1		yes|down
Glyma.15G084300.Wm82.a4.v1	(1 of 2) PTHR31933:SF2 - O-FUCOSYLTRANSFERASE-LIKE PROTEIN	yes|down
Glyma.13G318600.Wm82.a4.v1	(1 of 16) PF07876 - Stress responsive A/B Barrel Domain (Dabb)	yes|down
Glyma.04G137600.Wm82.a4.v1	(1 of 4) PTHR26402//PTHR26402:SF574 - RESPONSE REGULATOR OF TWO-COMPONENT SYSTEM // SUBFAMILY NOT NAMED	yes|down
Glyma.10G272000.Wm82.a4.v1	(1 of 3) PTHR31042//PTHR31042:SF10 - FAMILY NOT NAMED // CORE-2/I-BRANCHING BETA-1,6-N-ACETYLGLUCOSAMINYLTRANSFERASE-LIKE PROTEIN	yes|up
Glyma.18G037600.Wm82.a4.v1	(1 of 5) PF01453//PF07714//PF08276 - D-mannose binding lectin (B_lectin) // Protein tyrosine kinase (Pkinase_Tyr) // PAN-like domain (PAN_2)	yes|up
Glyma.18G159700.Wm82.a4.v1		yes|down
Glyma.13G079300.Wm82.a4.v1	(1 of 13) PTHR22835//PTHR22835:SF239 - ZINC FINGER FYVE DOMAIN CONTAINING PROTEIN // SUBFAMILY NOT NAMED	yes|up
Glyma.10G282100.Wm82.a4.v1	(1 of 7) PTHR13789//PTHR13789:SF185 - MONOOXYGENASE // FAD/NAD(P)-BINDING OXIDOREDUCTASE FAMILY PROTEIN	yes|up
Glyma.12G178000.Wm82.a4.v1	(1 of 57) K08235 - xyloglucan:xyloglucosyl transferase (E2.4.1.207)	yes|down
Glyma.10G210000.Wm82.a4.v1	(1 of 4) PTHR10774:SF62 - SYNAPTOTAGMIN-3	yes|down
Glyma.02G286500.Wm82.a4.v1	(1 of 4) PTHR15486:SF0 - ANCIENT UBIQUITOUS PROTEIN 1	yes|down
Glyma.07G017200.Wm82.a4.v1		yes|up
Glyma.12G120600.Wm82.a4.v1	(1 of 3) PTHR24072//PTHR24072:SF167 - RHO FAMILY GTPASE // RAC-LIKE GTP-BINDING PROTEIN ARAC2	yes|down
Glyma.06G045400.Wm82.a4.v1	(1 of 86) PF13912 - C2H2-type zinc finger (zf-C2H2_6)	yes|up
Glyma.12G135300.Wm82.a4.v1	(1 of 39) K05658 - ATP-binding cassette, subfamily B (MDR/TAP), member 1 (ABCB1)	yes|down
Glyma.13G204400.Wm82.a4.v1	(1 of 310) PF00010 - Helix-loop-helix DNA-binding domain (HLH)	yes|up
Glyma.01G011500.Wm82.a4.v1	(1 of 10) PTHR21493//PTHR21493:SF2 - CGI-141-RELATED/LIPASE CONTAINING PROTEIN // SUBFAMILY NOT NAMED	yes|up
Glyma.05G063200.Wm82.a4.v1		yes|up
Glyma.08G217400.Wm82.a4.v1	(1 of 6) PTHR19139//PTHR19139:SF170 - AQUAPORIN TRANSPORTER // AQUAPORIN NIP6-1	yes|up
Glyma.11G223900.Wm82.a4.v1	(1 of 11) PTHR11654//PTHR11654:SF128 - OLIGOPEPTIDE TRANSPORTER-RELATED // SUBFAMILY NOT NAMED	yes|down
Glyma.15G223900.Wm82.a4.v1	(1 of 6) PTHR22893//PTHR22893:SF44 - NADH OXIDOREDUCTASE-RELATED // SUBFAMILY NOT NAMED	yes|up
Glyma.13G191600.Wm82.a4.v1	(1 of 3) K01025 - uncharacterized protein (E2.8.2.-)	yes|down
Glyma.18G049500.Wm82.a4.v1	(1 of 1) PTHR24282//PTHR24282:SF11 - CYTOCHROME P450 FAMILY MEMBER // SUBFAMILY NOT NAMED	yes|down
Glyma.03G093600.Wm82.a4.v1	(1 of 3) PTHR31942//PTHR31942:SF13 - FAMILY NOT NAMED // MLO-LIKE PROTEIN 15	yes|up
Glyma.01G240800.Wm82.a4.v1	(1 of 51) PF01657//PF07714 - Salt stress response/antifungal (Stress-antifung) // Protein tyrosine kinase (Pkinase_Tyr)	yes|up
Glyma.13G348500.Wm82.a4.v1	(1 of 6) PTHR31250:SF13 - CALMODULIN-BINDING PROTEIN	yes|down
Glyma.05G041100.Wm82.a4.v1	(1 of 74) PF00582 - Universal stress protein family (Usp)	yes|down
Glyma.17G216100.Wm82.a4.v1	(1 of 8) PTHR31194//PTHR31194:SF4 - SHN SHINE , DNA BINDING / TRANSCRIPTION FACTOR // ETHYLENE-RESPONSIVE TRANSCRIPTION FACTOR ERF003	yes|down
Glyma.12G119300.Wm82.a4.v1	(1 of 32) K08472 - mlo protein (MLO)	yes|up
Glyma.10G004200.Wm82.a4.v1	(1 of 3) PTHR13832//PTHR13832:SF283 - PROTEIN PHOSPHATASE 2C // PROTEIN PHOSPHATASE 2C-LIKE PROTEIN 44-RELATED	yes|up
Glyma.14G167800.Wm82.a4.v1		yes|down
Glyma.13G032100.Wm82.a4.v1	(1 of 2227) 2.7.11.1 - Non-specific serine/threonine protein kinase / Threonine-specific protein kinase	yes|up
Glyma.02G106200.Wm82.a4.v1		yes|up
Glyma.15G128800.Wm82.a4.v1	(1 of 13) PTHR31388//PTHR31388:SF22 - FAMILY NOT NAMED // PEROXIDASE 22-RELATED	yes|up
Glyma.01G179600.Wm82.a4.v1	(1 of 32) 1.14.13.121 - Premnaspirodiene oxygenase / Hyoscymus muticus premnaspirodiene oxygenase	yes|up
Glyma.16G078900.Wm82.a4.v1	(1 of 78) PF00069//PF08263//PF13855 - Protein kinase domain (Pkinase) // Leucine rich repeat N-terminal domain (LRRNT_2) // Leucine rich repeat (LRR_8)	yes|up
Glyma.15G236900.Wm82.a4.v1	(1 of 8) PTHR23180:SF249 - ADP-RIBOSYLATION FACTOR GTPASE-ACTIVATING PROTEIN AGD11-RELATED	yes|down
Glyma.19G254300.Wm82.a4.v1	(1 of 4) PTHR32285:SF9 - PROTEIN TRICHOME BIREFRINGENCE-LIKE 25-RELATED	yes|down
Glyma.02G045500.Wm82.a4.v1	(1 of 1) PTHR22952//PTHR22952:SF211 - CAMP-RESPONSE ELEMENT BINDING PROTEIN-RELATED // SUBFAMILY NOT NAMED	yes|down
Glyma.10G235000.Wm82.a4.v1	(1 of 4) PTHR33649:SF2 - PAR1 PROTEIN	yes|down
Glyma.10G036600.Wm82.a4.v1	(1 of 349) PF00847 - AP2 domain (AP2)	yes|up
Glyma.19G053800.Wm82.a4.v1	(1 of 2) PTHR31683:SF29 - PECTATE LYASE 11-RELATED	yes|down
Glyma.19G094100.Wm82.a4.v1	(1 of 3) PTHR31221:SF25 - WRKY TRANSCRIPTION FACTOR 45-RELATED	yes|up
Glyma.01G216600.Wm82.a4.v1	(1 of 4) PTHR11206:SF127 - MATE EFFLUX FAMILY PROTEIN	yes|up
Glyma.17G245200.Wm82.a4.v1	(1 of 3) PTHR10641//PTHR10641:SF611 - MYB-LIKE DNA-BINDING PROTEIN MYB // SUBFAMILY NOT NAMED	yes|down
Glyma.03G005700.Wm82.a4.v1	(1 of 4) 2.3.3.13//2.3.3.14 - 2-isopropylmalate synthase / Isopropylmalate synthetase // Homocitrate synthase / Homocitrate synthetase	yes|down
Glyma.18G055800.Wm82.a4.v1		yes|down
Glyma.07G109600.Wm82.a4.v1	(1 of 3) PTHR31251:SF4 - SQUAMOSA PROMOTER-BINDING-LIKE PROTEIN 8	yes|down
Glyma.08G076500.Wm82.a4.v1		yes|down
Glyma.04G171800.Wm82.a4.v1	(1 of 3) PTHR24064//PTHR24064:SF242 - FAMILY NOT NAMED // ORGANIC CATION/CARNITINE TRANSPORTER 3	yes|down
Glyma.10G135600.Wm82.a4.v1	(1 of 273) PF00646 - F-box domain (F-box)	yes|down
Glyma.17G090000.Wm82.a4.v1	(1 of 9) PTHR23257//PTHR23257:SF475 - SERINE-THREONINE PROTEIN KINASE // SUBFAMILY NOT NAMED	yes|down
Glyma.03G104500.Wm82.a4.v1	(1 of 23) 2.4.1.218 - Hydroquinone glucosyltransferase / Hydroquinone:O-glucosyltransferase	yes|down
Glyma.10G005400.Wm82.a4.v1	(1 of 5) PTHR11654//PTHR11654:SF73 - OLIGOPEPTIDE TRANSPORTER-RELATED // PROTEIN NRT1/ PTR FAMILY 5.2-RELATED	yes|up
Glyma.13G282100.Wm82.a4.v1	(1 of 5) PTHR10641//PTHR10641:SF567 - MYB-LIKE DNA-BINDING PROTEIN MYB // SUBFAMILY NOT NAMED	yes|down
Glyma.08G251700.Wm82.a4.v1	(1 of 273) PF00646 - F-box domain (F-box)	yes|down
Glyma.17G232290.Wm82.a4.v1	(1 of 1) PTHR32467//PTHR32467:SF11 - FAMILY NOT NAMED // AP2-LIKE ETHYLENE-RESPONSIVE TRANSCRIPTION FACTOR ANT	yes|down
Glyma.05G033600.Wm82.a4.v1		yes|up
Glyma.09G284700.Wm82.a4.v1	(1 of 154) K00430 - peroxidase (E1.11.1.7)	yes|up
Glyma.13G286900.Wm82.a4.v1	(1 of 4) PTHR32116//PTHR32116:SF24 - FAMILY NOT NAMED // GALACTURONOSYLTRANSFERASE 12-RELATED	yes|down
Glyma.07G214000.Wm82.a4.v1	(1 of 10) PF02721//PF08646 - Domain of unknown function DUF223 (DUF223) // Replication factor-A C terminal domain (Rep_fac-A_C)	yes|down
Glyma.08G262800.Wm82.a4.v1	(1 of 3) 3.2.1.177//3.2.1.37//3.2.1.55 - Alpha-D-xyloside xylohydrolase / Alpha-xylosidase // Xylan 1,4-beta-xylosidase / Xylobiase // Non-reducing end alpha-L-arabinofuranosidase / Arabinosidase	yes|down
Glyma.06G286600.Wm82.a4.v1	(1 of 10) PTHR11746//PTHR11746:SF83 - O-METHYLTRANSFERASE // SUBFAMILY NOT NAMED	yes|up
Glyma.07G183300.Wm82.a4.v1	(1 of 8) 2.4.1.91 - Flavonol 3-O-glucosyltransferase / UDP-glucose flavonol 3-O-glucosyltransferase	yes|down
Glyma.03G201550.Wm82.a4.v1	(1 of 16) PTHR31415:SF4 - HARPIN-INDUCED PROTEIN-LIKE-RELATED	yes|up
Glyma.02G222600.Wm82.a4.v1	(1 of 4) PTHR22814//PTHR22814:SF51 - COPPER TRANSPORT PROTEIN ATOX1-RELATED // HEAVY METAL TRANSPORT/DETOXIFICATION DOMAIN-CONTAINING PROTEIN	yes|down
Glyma.01G224800.Wm82.a4.v1	(1 of 176) PF03106 - WRKY DNA -binding domain (WRKY)	yes|up
Glyma.14G067000.Wm82.a4.v1	(1 of 3) PTHR32429:SF12 - RIBULOSE BISPHOSPHATE CARBOXYLASE/OXYGENASE ACTIVASE, CHLOROPLASTIC	yes|down
Glyma.13G363300.Wm82.a4.v1	(1 of 18) PTHR23241 - LATE EMBRYOGENESIS ABUNDANT PLANTS LEA-RELATED	yes|down
Glyma.09G023600.Wm82.a4.v1	(1 of 5) PTHR24326//PTHR24326:SF191 - FAMILY NOT NAMED // HOMEOBOX-LEUCINE ZIPPER PROTEIN ATHB-14-RELATED	yes|down
Glyma.19G258800.Wm82.a4.v1	(1 of 155) K14488 - SAUR family protein (SAUR)	yes|up
Glyma.06G266900.Wm82.a4.v1	(1 of 4) PTHR32116//PTHR32116:SF24 - FAMILY NOT NAMED // GALACTURONOSYLTRANSFERASE 12-RELATED	yes|down
Glyma.10G198700.Wm82.a4.v1	(1 of 1) PTHR13140//PTHR13140:SF480 - MYOSIN // SUBFAMILY NOT NAMED	yes|down
Glyma.13G108300.Wm82.a4.v1	(1 of 4) PTHR33541:SF5 - GENOMIC DNA, CHROMOSOME 3, P1 CLONE: MDC16-RELATED	yes|down
Glyma.10G176600.Wm82.a4.v1	(1 of 13) 2.1.1.150 - Isoflavone 7-O-methyltransferase	yes|up
Glyma.10G258000.Wm82.a4.v1	(1 of 2) PTHR32370:SF4 - BTB/POZ DOMAIN-CONTAINING PROTEIN NPY2	yes|down
Glyma.11G074700.Wm82.a4.v1	(1 of 2) PTHR31623//PTHR31623:SF3 - FAMILY NOT NAMED // F21J9.9	yes|down
Glyma.14G103100.Wm82.a4.v1	(1 of 8) PTHR31429:SF3 - WRKY TRANSCRIPTION FACTOR 40-RELATED	yes|up
Glyma.07G113200.Wm82.a4.v1	(1 of 17) KOG2722 - Predicted membrane protein	yes|down
Glyma.12G237433.Wm82.a4.v1	(1 of 6) PTHR11206:SF156 - MATE EFFLUX FAMILY PROTEIN FRD3	yes|down
Glyma.17G015100.Wm82.a4.v1		yes|down
Glyma.02G229500.Wm82.a4.v1	(1 of 9) PTHR27001:SF83 - LRR RECEPTOR-LIKE SERINE/THREONINE-PROTEIN KINASE MRH1-RELATED	yes|down
Glyma.03G189800.Wm82.a4.v1	(1 of 33) PF00069//PF08263 - Protein kinase domain (Pkinase) // Leucine rich repeat N-terminal domain (LRRNT_2)	yes|down
Glyma.03G187500.Wm82.a4.v1	(1 of 12) K13496 - UDP-glucosyl transferase 73C [EC:2.4.1.-] Glc - brassinosteroid (UGT73C)	yes|down
Glyma.10G138300.Wm82.a4.v1	(1 of 176) PF03106 - WRKY DNA -binding domain (WRKY)	yes|down
Glyma.03G201500.Wm82.a4.v1	(1 of 16) PTHR31415:SF4 - HARPIN-INDUCED PROTEIN-LIKE-RELATED	yes|up
Glyma.12G083500.Wm82.a4.v1	(1 of 5) PTHR22891//PTHR22891:SF40 - EUKARYOTIC TRANSLATION INITIATION FACTOR 2C // PROTEIN ARGONAUTE 5	yes|down
Glyma.04G211800.Wm82.a4.v1	(1 of 4) PTHR19241//PTHR19241:SF230 - ATP-BINDING CASSETTE TRANSPORTER // ABC TRANSPORTER G FAMILY MEMBER 5	yes|down
Glyma.19G159600.Wm82.a4.v1	(1 of 4) PTHR10593//PTHR10593:SF20 - SERINE/THREONINE-PROTEIN KINASE RIO // INDETERMINATE-DOMAIN 12 PROTEIN	yes|down
Glyma.04G008200.Wm82.a4.v1	(1 of 6) PTHR24115//PTHR24115:SF405 - FAMILY NOT NAMED // ATP BINDING MICROTUBULE MOTOR FAMILY PROTEIN	yes|down
Glyma.02G060900.Wm82.a4.v1	(1 of 80) PF14009 - Domain of unknown function (DUF4228) (DUF4228)	yes|down
Glyma.10G253700.Wm82.a4.v1	(1 of 3) PTHR32099//PTHR32099:SF4 - CYSTEINE-RICH REPEAT SECRETORY PROTEIN // CYSTEINE-RICH REPEAT SECRETORY PROTEIN 1-RELATED	yes|up
Glyma.18G272400.Wm82.a4.v1	(1 of 2) PTHR33417//PTHR33417:SF1 - FAMILY NOT NAMED // B12D PROTEIN	yes|up
Glyma.08G097300.Wm82.a4.v1	(1 of 7) K11517 - (S)-2-hydroxy-acid oxidase (HAO)	yes|down
Glyma.02G311000.Wm82.a4.v1	(1 of 4) PTHR32002//PTHR32002:SF3 - FAMILY NOT NAMED // PROTEIN NLP1-RELATED	yes|down
Glyma.02G258600.Wm82.a4.v1		yes|down
Glyma.18G036000.Wm82.a4.v1	(1 of 86) PF13912 - C2H2-type zinc finger (zf-C2H2_6)	yes|down
Glyma.09G266533.Wm82.a4.v1		yes|up
Glyma.08G162400.Wm82.a4.v1	(1 of 17) PTHR13683:SF298 - ASPARTIC PROTEINASE CDR1-RELATED	yes|down
Glyma.10G231700.Wm82.a4.v1	(1 of 1) PTHR11972//PTHR11972:SF79 - NADPH OXIDASE // SUBFAMILY NOT NAMED	yes|up
Glyma.09G087200.Wm82.a4.v1	(1 of 13) K08150 - MFS transporter, SP family, solute carrier family 2 (myo-inositol transporter), member 13 (SLC2A13, ITR)	yes|down
Glyma.02G259700.Wm82.a4.v1	(1 of 6) PF04588 - Hypoxia induced protein conserved region (HIG_1_N)	yes|down
Glyma.13G300600.Wm82.a4.v1	(1 of 17) PF04484 - Family of unknown function (DUF566) (DUF566)	yes|down
Glyma.16G043000.Wm82.a4.v1	(1 of 3) PF14200 - Ricin-type beta-trefoil lectin domain-like (RicinB_lectin_2)	yes|down
Glyma.10G150600.Wm82.a4.v1	(1 of 4) PTHR31707//PTHR31707:SF33 - FAMILY NOT NAMED // INVERTASE/PECTIN METHYLESTERASE INHIBITOR FAMILY PROTEIN	yes|up
Glyma.06G020300.Wm82.a4.v1	(1 of 2) 4.1.1.17 - Ornithine decarboxylase / L-ornithine carboxy-lyase	yes|down
Glyma.18G259900.Wm82.a4.v1	(1 of 6) PTHR11654//PTHR11654:SF90 - OLIGOPEPTIDE TRANSPORTER-RELATED // PROTEIN NRT1/ PTR FAMILY 7.2	yes|down
Glyma.16G014100.Wm82.a4.v1	(1 of 2) PTHR31707//PTHR31707:SF55 - FAMILY NOT NAMED // PECTINESTERASE 2-RELATED	yes|down
Glyma.11G071800.Wm82.a4.v1	(1 of 6) PTHR23070//PTHR23070:SF12 - BCS1 AAA-TYPE ATPASE // SUBFAMILY NOT NAMED	yes|down
Glyma.04G247800.Wm82.a4.v1	(1 of 3) PTHR26402//PTHR26402:SF498 - RESPONSE REGULATOR OF TWO-COMPONENT SYSTEM // SUBFAMILY NOT NAMED	yes|down
Glyma.13G301800.Wm82.a4.v1	(1 of 36) PF12609 - Wound-induced protein (DUF3774)	yes|up
Glyma.16G068900.Wm82.a4.v1	(1 of 1) PTHR22835//PTHR22835:SF219 - ZINC FINGER FYVE DOMAIN CONTAINING PROTEIN // SUBFAMILY NOT NAMED	yes|down
Glyma.13G160400.Wm82.a4.v1	(1 of 34) PF14547 - Hydrophobic seed protein (Hydrophob_seed)	yes|down
Glyma.10G273300.Wm82.a4.v1	(1 of 74) PF05678 - VQ motif (VQ)	yes|up
Glyma.05G131000.Wm82.a4.v1		yes|up
Glyma.10G137300.Wm82.a4.v1		yes|up
Glyma.11G153800.Wm82.a4.v1	(1 of 11) PTHR10502//PTHR10502:SF113 - ANNEXIN // SUBFAMILY NOT NAMED	yes|down
Glyma.19G106700.Wm82.a4.v1	(1 of 6) PTHR31062//PTHR31062:SF15 - FAMILY NOT NAMED // XYLOGLUCAN ENDOTRANSGLUCOSYLASE/HYDROLASE PROTEIN 4-RELATED	yes|down
Glyma.18G054000.Wm82.a4.v1	(1 of 7) PTHR31867:SF22 - EXPANSIN-A8	yes|down
Glyma.01G128300.Wm82.a4.v1	(1 of 3) K14685 - solute carrier family 40 (iron-regulated transporter), member 1 (SLC40A1, FPN1)	yes|down
Glyma.09G235200.Wm82.a4.v1	(1 of 7) PTHR10783//PTHR10783:SF43 - XENOTROPIC AND POLYTROPIC RETROVIRUS RECEPTOR 1-RELATED // PHOSPHATE TRANSPORTER PHO1 HOMOLOG 2-RELATED	yes|down
Glyma.17G127900.Wm82.a4.v1	(1 of 6) PTHR33595//PTHR33595:SF3 - FAMILY NOT NAMED // EMB|CAB62340.1-RELATED	yes|down
Glyma.08G204800.Wm82.a4.v1	(1 of 4) K02695 - photosystem I subunit VI (psaH)	yes|down
Glyma.20G100500.Wm82.a4.v1	(1 of 1) 2.7.11.1//3.5.1.98 - Non-specific serine/threonine protein kinase / Threonine-specific protein kinase // Histone deacetylase / HDAC	yes|down
Glyma.17G124600.Wm82.a4.v1	(1 of 30) PF05910 - Plant protein of unknown function (DUF868) (DUF868)	yes|down
Glyma.06G255700.Wm82.a4.v1	(1 of 7) PTHR10891//PTHR10891:SF585 - EF-HAND CALCIUM-BINDING DOMAIN CONTAINING PROTEIN // SUBFAMILY NOT NAMED	yes|down
Glyma.11G133700.Wm82.a4.v1	(1 of 2) PTHR10641//PTHR10641:SF593 - MYB-LIKE DNA-BINDING PROTEIN MYB // SUBFAMILY NOT NAMED	yes|down
Glyma.08G043500.Wm82.a4.v1	(1 of 37) PF04749 - PLAC8 family (PLAC8)	yes|down
Glyma.04G167900.Wm82.a4.v1	(1 of 2) K08910 - light-harvesting complex I chlorophyll a/b binding protein 4 (LHCA4)	yes|down
Glyma.10G086800.Wm82.a4.v1	(1 of 4) PTHR19241//PTHR19241:SF286 - ATP-BINDING CASSETTE TRANSPORTER // SUBFAMILY NOT NAMED	yes|down
Glyma.01G129000.Wm82.a4.v1	(1 of 12) PTHR31087:SF11 - PROTEIN LURP-ONE-RELATED 1-RELATED	yes|up
Glyma.08G229700.Wm82.a4.v1	(1 of 273) PF00646 - F-box domain (F-box)	yes|down
Glyma.02G111100.Wm82.a4.v1		yes|down
Glyma.08G327200.Wm82.a4.v1	(1 of 150) KOG0156 - Cytochrome P450 CYP2 subfamily	yes|down
Glyma.05G208700.Wm82.a4.v1	(1 of 8) PTHR19139//PTHR19139:SF169 - AQUAPORIN TRANSPORTER // AQUAPORIN PIP1-4-RELATED	yes|down
Glyma.09G093050.Wm82.a4.v1	(1 of 2) PTHR32093//PTHR32093:SF16 - FAMILY NOT NAMED // GENOMIC DNA, CHROMOSOME 3, P1 CLONE:MKA23-RELATED	yes|down
Glyma.14G064400.Wm82.a4.v1	(1 of 14) PTHR10795//PTHR10795:SF348 - PROPROTEIN CONVERTASE SUBTILISIN/KEXIN // SUBFAMILY NOT NAMED	yes|down
Glyma.06G092000.Wm82.a4.v1	(1 of 4) PTHR31945:SF6 - TRANSCRIPTION FACTOR BHLH61-RELATED	yes|down
Glyma.15G163500.Wm82.a4.v1	(1 of 5) PTHR31517//PTHR31517:SF10 - FAMILY NOT NAMED // PEROXIDASE 16-RELATED	yes|up
Glyma.17G068900.Wm82.a4.v1		yes|down
Glyma.01G163100.Wm82.a4.v1	(1 of 4) PTHR31235//PTHR31235:SF67 - FAMILY NOT NAMED // PEROXIDASE 64	yes|down
Glyma.12G021500.Wm82.a4.v1	(1 of 6) PF03435 - Saccharopine dehydrogenase NADP binding domain (Sacchrp_dh_NADP)	yes|down
Glyma.17G151500.Wm82.a4.v1	(1 of 157) PF04043 - Plant invertase/pectin methylesterase inhibitor (PMEI)	yes|down
Glyma.13G044100.Wm82.a4.v1	(1 of 7) 2.3.1.162 - Taxadien-5-alpha-ol O-acetyltransferase / Taxadienol acetyltransferase	yes|down
Glyma.08G120100.Wm82.a4.v1	(1 of 6) PTHR19139:SF144 - AQUAPORIN NIP1-1-RELATED	yes|down
Glyma.13G319600.Wm82.a4.v1	(1 of 3) PTHR32044//PTHR32044:SF17 - FAMILY NOT NAMED // GLUCOMANNAN 4-BETA-MANNOSYLTRANSFERASE 2	yes|down
Glyma.10G115300.Wm82.a4.v1	(1 of 32) 1.14.13.121 - Premnaspirodiene oxygenase / Hyoscymus muticus premnaspirodiene oxygenase	yes|up
Glyma.09G159900.Wm82.a4.v1	(1 of 65) PF03140 - Plant protein of unknown function (DUF247)	yes|up
Glyma.09G231800.Wm82.a4.v1	(1 of 4) PTHR22298//PTHR22298:SF45 - ENDO-1,4-BETA-GLUCANASE // SUBFAMILY NOT NAMED	yes|down
Glyma.07G173100.Wm82.a4.v1	(1 of 5) PTHR27001//PTHR27001:SF164 - FAMILY NOT NAMED // RECEPTOR PROTEIN KINASE TMK1-RELATED	yes|down
Glyma.14G086200.Wm82.a4.v1	(1 of 4) PTHR10177//PTHR10177:SF242 - CYCLINE // SUBFAMILY NOT NAMED	yes|down
Glyma.07G203100.Wm82.a4.v1	(1 of 2) PTHR24072//PTHR24072:SF178 - RHO FAMILY GTPASE // SUBFAMILY NOT NAMED	yes|down
Glyma.10G216000.Wm82.a4.v1	(1 of 3) PTHR23201:SF7 - GIBBERELLIN-REGULATED PROTEIN 2-RELATED	yes|down
Glyma.11G184800.Wm82.a4.v1	(1 of 5) PTHR10795//PTHR10795:SF427 - PROPROTEIN CONVERTASE SUBTILISIN/KEXIN // SUBFAMILY NOT NAMED	yes|up
Glyma.03G029900.Wm82.a4.v1	(1 of 20) PTHR24298:SF86 - CYTOCHROME P450 71B21-RELATED	yes|down
Glyma.19G255800.Wm82.a4.v1	(1 of 4) PTHR23130:SF97 - CYTOCHROME B561/FERRIC REDUCTASE TRANSMEMBRANE WITH DOMON RELATED DOMAIN	yes|down
Glyma.06G143700.Wm82.a4.v1	(1 of 2) PF05349 - GATA-type transcription activator, N-terminal (GATA-N)	yes|down
Glyma.17G046600.Wm82.a4.v1	(1 of 3) PTHR23023//PTHR23023:SF143 - DIMETHYLANILINE MONOOXYGENASE // FLAVIN-CONTAINING MONOOXYGENASE 1-RELATED	yes|up
Glyma.12G129500.Wm82.a4.v1	(1 of 154) K00430 - peroxidase (E1.11.1.7)	yes|down
Glyma.18G121600.Wm82.a4.v1	(1 of 4) PTHR12300//PTHR12300:SF51 - HVA22-LIKE PROTEINS // HVA22-LIKE PROTEIN C	yes|down
Glyma.06G190000.Wm82.a4.v1	(1 of 33) PF00069//PF08263 - Protein kinase domain (Pkinase) // Leucine rich repeat N-terminal domain (LRRNT_2)	yes|down
Glyma.05G222400.Wm82.a4.v1	(1 of 3) PTHR10209//PTHR10209:SF103 - OXIDOREDUCTASE, 2OG-FE II OXYGENASE FAMILY PROTEIN // SUBFAMILY NOT NAMED	yes|down
Glyma.13G314200.Wm82.a4.v1		yes|down
Glyma.08G131925.Wm82.a4.v1		yes|down
Glyma.13G063100.Wm82.a4.v1	(1 of 6) PTHR31948:SF12 - MINI ZINC FINGER PROTEIN 2	yes|down
Glyma.15G203500.Wm82.a4.v1	(1 of 150) KOG0156 - Cytochrome P450 CYP2 subfamily	yes|up
Glyma.05G161200.Wm82.a4.v1	(1 of 2) PTHR31161:SF7 - F28N24.3 PROTEIN	yes|down
Glyma.08G206200.Wm82.a4.v1		yes|down
Glyma.08G216600.Wm82.a4.v1	(1 of 8) PTHR31194//PTHR31194:SF4 - SHN SHINE , DNA BINDING / TRANSCRIPTION FACTOR // ETHYLENE-RESPONSIVE TRANSCRIPTION FACTOR ERF003	yes|down
Glyma.08G166600.Wm82.a4.v1	(1 of 17) PTHR13683:SF298 - ASPARTIC PROTEINASE CDR1-RELATED	yes|down
Glyma.13G364400.Wm82.a4.v1	(1 of 8) PF02451 - Nodulin (Nodulin)	yes|down
Glyma.18G238800.Wm82.a4.v1	(1 of 12) 2.1.1.274 - Salicylate carboxymethyltransferase / Salicylate O-methyltransferase	yes|up
Glyma.07G185300.Wm82.a4.v1	(1 of 7) PTHR23042:SF61 - TRANSCRIPTION FACTOR BHLH18-RELATED	yes|down
Glyma.02G210600.Wm82.a4.v1	(1 of 17) K10664 - E3 ubiquitin-protein ligase ATL6/9/15/31/42/55 [EC:6.3.2.19] (ATL6S)	yes|down
Glyma.18G078200.Wm82.a4.v1	(1 of 4) PTHR34947:SF2 - GENOMIC DNA, CHROMOSOME 3, P1 CLONE:MJG19	yes|down
Glyma.03G065500.Wm82.a4.v1	(1 of 1) PTHR10791//PTHR10791:SF29//PTHR31062//PTHR31062:SF34 - RAG1-ACTIVATING PROTEIN 1 // BIDIRECTIONAL SUGAR TRANSPORTER SWEET16-RELATED // FAMILY NOT NAMED // XYLOGLUCAN ENDOTRANSGLUCOSYLASE/HYDROLASE PROTEIN 15-RELATED	yes|up
Glyma.01G185500.Wm82.a4.v1	(1 of 4) PTHR31722//PTHR31722:SF5 - FAMILY NOT NAMED // EMB|CAB62433.1|-RELATED	yes|down
Glyma.10G114600.Wm82.a4.v1	(1 of 32) 1.14.13.121 - Premnaspirodiene oxygenase / Hyoscymus muticus premnaspirodiene oxygenase	yes|up
Glyma.08G190700.Wm82.a4.v1	(1 of 7) PTHR24223//PTHR24223:SF108 - FAMILY NOT NAMED // ABC TRANSPORTER C FAMILY MEMBER 8	yes|down
Glyma.01G037500.Wm82.a4.v1	(1 of 8) PTHR26402:SF526 - TWO-COMPONENT RESPONSE REGULATOR ARR15-RELATED	yes|down
Glyma.08G108000.Wm82.a4.v1	(1 of 4) K17285 - selenium-binding protein 1 (SELENBP1)	yes|down
Glyma.07G001800.Wm82.a4.v1	(1 of 20) K14684 - solute carrier family 25 (mitochondrial phosphate transporter), member 23/24/25/41 (SLC25A23S)	yes|down
Glyma.18G249502.Wm82.a4.v1	(1 of 176) PF03106 - WRKY DNA -binding domain (WRKY)	yes|down
Glyma.12G063900.Wm82.a4.v1	(1 of 4) PTHR24326//PTHR24326:SF203 - FAMILY NOT NAMED // WUSCHEL-RELATED HOMEOBOX 2	yes|down
Glyma.08G342100.Wm82.a4.v1	(1 of 21) PTHR33107:SF5 - KUNITZ FAMILY TRYPSIN AND PROTEASE INHIBITOR PROTEIN-RELATED	yes|down
Glyma.03G105200.Wm82.a4.v1	(1 of 2) PTHR22884//PTHR22884:SF340 - SET DOMAIN PROTEINS // HISTONE-LYSINE N-METHYLTRANSFERASE SU(VAR)3-9-RELATED	yes|down
Glyma.10G140200.Wm82.a4.v1	(1 of 4) PTHR31867:SF34 - EXPANSIN-A17-RELATED	yes|up
Glyma.13G359200.Wm82.a4.v1	(1 of 2) PTHR31852//PTHR31852:SF17 - FAMILY NOT NAMED // EXPRESSED PROTEIN	yes|down
Glyma.17G042800.Wm82.a4.v1	(1 of 2) PTHR31734//PTHR31734:SF3 - FAMILY NOT NAMED // AUXIN-RESPONSIVE PROTEIN IAA31	yes|down
Glyma.10G019900.Wm82.a4.v1	(1 of 2) PTHR11260:SF263 - GLUTATHIONE S-TRANSFERASE F13	yes|down
Glyma.20G209200.Wm82.a4.v1	(1 of 2) PTHR31165//PTHR31165:SF13 - FAMILY NOT NAMED // PROTEIN LIGHT-DEPENDENT SHORT HYPOCOTYLS 1-RELATED	yes|down
Glyma.04G086600.Wm82.a4.v1	(1 of 7) PTHR22950//PTHR22950:SF208 - AMINO ACID TRANSPORTER // SUBFAMILY NOT NAMED	yes|down
Glyma.09G236200.Wm82.a4.v1	(1 of 74) PF01357//PF03330 - Pollen allergen (Pollen_allerg_1) // Rare lipoprotein A (RlpA)-like double-psi beta-barrel (DPBB_1)	yes|down
Glyma.19G133400.Wm82.a4.v1	(1 of 9) PTHR10209//PTHR10209:SF182 - OXIDOREDUCTASE, 2OG-FE II OXYGENASE FAMILY PROTEIN // SUBFAMILY NOT NAMED	yes|up
Glyma.03G201302.Wm82.a4.v1	(1 of 16) PTHR31415:SF4 - HARPIN-INDUCED PROTEIN-LIKE-RELATED	yes|up
Glyma.01G242100.Wm82.a4.v1		yes|down
Glyma.10G036300.Wm82.a4.v1	(1 of 16) K14516 - ethylene-responsive transcription factor 1 (ERF1)	yes|up
Glyma.18G012200.Wm82.a4.v1	(1 of 5) PTHR31683//PTHR31683:SF26 - FAMILY NOT NAMED // PECTATE LYASE 5-RELATED	yes|up
Glyma.01G013200.Wm82.a4.v1	(1 of 10) PTHR21493//PTHR21493:SF2 - CGI-141-RELATED/LIPASE CONTAINING PROTEIN // SUBFAMILY NOT NAMED	yes|up
Glyma.10G202300.Wm82.a4.v1	(1 of 47) KOG4282 - Transcription factor GT-2 and related proteins, contains trihelix DNA-binding/SANT domain	yes|down
Glyma.05G161400.Wm82.a4.v1	(1 of 8) PTHR11260//PTHR11260:SF233 - GLUTATHIONE S-TRANSFERASE, GST, SUPERFAMILY, GST DOMAIN CONTAINING // SUBFAMILY NOT NAMED	yes|up
Glyma.17G096400.Wm82.a4.v1	(1 of 6) PTHR11654:SF59 - PROTEIN NRT1/ PTR FAMILY 2.10-RELATED	yes|up
Glyma.14G012400.Wm82.a4.v1	(1 of 5) PTHR22601:SF8 - OLIGOPEPTIDE TRANSPORTER 1-RELATED	yes|down
Glyma.07G088200.Wm82.a4.v1	(1 of 3) PTHR11814:SF54 - SULFATE TRANSPORTER 3.5-RELATED	yes|down
Glyma.09G129700.Wm82.a4.v1	(1 of 4) PTHR12064//PTHR12064:SF36 - ANCIENT CONSERVED DOMAIN PROTEIN-RELATED // SUBFAMILY NOT NAMED	yes|down
Glyma.09G155500.Wm82.a4.v1	(1 of 11) PTHR33107//PTHR33107:SF1 - FAMILY NOT NAMED // DR4 PROTEIN-RELATED	yes|down
Glyma.20G192700.Wm82.a4.v1	(1 of 2) 5.4.99.41 - Lupeol synthase	yes|down
Glyma.09G060700.Wm82.a4.v1		yes|up
Glyma.03G056200.Wm82.a4.v1	(1 of 4) PTHR32285//PTHR32285:SF7 - FAMILY NOT NAMED // PROTEIN TRICHOME BIREFRINGENCE-LIKE 3	yes|down
Glyma.06G174800.Wm82.a4.v1	(1 of 3) PTHR12411//PTHR12411:SF346 - CYSTEINE PROTEASE FAMILY C1-RELATED // KDEL-TAILED CYSTEINE ENDOPEPTIDASE CEP1-RELATED	yes|up
Glyma.10G248800.Wm82.a4.v1	(1 of 3) 2.5.1.79 - Thermospermine synthase	yes|down
Glyma.10G228900.Wm82.a4.v1	(1 of 25) PF00069//PF00954//PF01453 - Protein kinase domain (Pkinase) // S-locus glycoprotein domain (S_locus_glycop) // D-mannose binding lectin (B_lectin)	yes|down
Glyma.18G007400.Wm82.a4.v1	(1 of 2) PTHR12771//PTHR12771:SF19 - ENGULFMENT AND CELL MOTILITY // ELMO/CED-12 DOMAIN-CONTAINING PROTEIN-RELATED	yes|up
Glyma.06G088200.Wm82.a4.v1	(1 of 7) PTHR22950//PTHR22950:SF208 - AMINO ACID TRANSPORTER // SUBFAMILY NOT NAMED	yes|down
Glyma.18G071700.Wm82.a4.v1	(1 of 4) PTHR22950//PTHR22950:SF277 - AMINO ACID TRANSPORTER // SUBFAMILY NOT NAMED	yes|down
Glyma.06G037700.Wm82.a4.v1	(1 of 4) PTHR33348//PTHR33348:SF3 - FAMILY NOT NAMED // C-TERMINALLY ENCODED PEPTIDE 1	yes|down
Glyma.04G018900.Wm82.a4.v1	(1 of 2) PTHR21450:SF19 - F5M15.15	yes|down
Glyma.08G270300.Wm82.a4.v1	(1 of 3) PTHR24221:SF138 - LP14331P-RELATED	yes|down
Glyma.16G209100.Wm82.a4.v1	(1 of 65) PF03140 - Plant protein of unknown function (DUF247)	yes|down
Glyma.12G234600.Wm82.a4.v1	(1 of 2) PTHR10361//PTHR10361:SF28 - SODIUM-BILE ACID COTRANSPORTER // SODIUM/BILE ACID COTRANSPORTER 4	yes|down
Glyma.14G145900.Wm82.a4.v1	(1 of 2) PTHR22870//PTHR22870:SF155 - REGULATOR OF CHROMOSOME CONDENSATION // SUBFAMILY NOT NAMED	yes|down
Glyma.06G074100.Wm82.a4.v1	(1 of 7) PTHR31970:SF3 - MOLYBDATE TRANSPORTER 1	yes|down
Glyma.18G119200.Wm82.a4.v1		yes|up
Glyma.07G230300.Wm82.a4.v1	(1 of 4) PTHR10759//PTHR10759:SF9 - 60S RIBOSOMAL PROTEIN L34 // SUBFAMILY NOT NAMED	yes|down
Glyma.09G111200.Wm82.a4.v1	(1 of 9) PTHR11937//PTHR11937:SF255 - ACTIN // SUBFAMILY NOT NAMED	yes|down
Glyma.20G047400.Wm82.a4.v1	(1 of 1) PF10143//PF13921 - 2,3-bisphosphoglycerate-independent phosphoglycerate mutase (PhosphMutase) // Myb-like DNA-binding domain (Myb_DNA-bind_6)	yes|up
Glyma.18G015400.Wm82.a4.v1		yes|up
Glyma.01G012800.Wm82.a4.v1	(1 of 10) PTHR21493//PTHR21493:SF2 - CGI-141-RELATED/LIPASE CONTAINING PROTEIN // SUBFAMILY NOT NAMED	yes|up
Glyma.13G282900.Wm82.a4.v1	(1 of 6) PTHR23050//PTHR23050:SF170 - CALCIUM BINDING PROTEIN // SUBFAMILY NOT NAMED	yes|down
Glyma.13G301600.Wm82.a4.v1	(1 of 36) PF12609 - Wound-induced protein (DUF3774)	yes|up
Glyma.01G005100.Wm82.a4.v1	(1 of 5) 1.13.99.1 - Inositol oxygenase / Myo-inositol oxygenase	yes|up
Glyma.19G059200.Wm82.a4.v1	(1 of 21) PTHR31238//PTHR31238:SF42 - FAMILY NOT NAMED // GERMIN-LIKE PROTEIN SUBFAMILY 1 MEMBER 10-RELATED	yes|up
Glyma.08G126800.Wm82.a4.v1	(1 of 6) PTHR19370//PTHR19370:SF120 - NADH-CYTOCHROME B5 REDUCTASE // FERREDOXIN-1, CHLOROPLASTIC-RELATED	yes|down
Glyma.04G174600.Wm82.a4.v1	(1 of 3) 1.1.1.223 - Isopiperitenol dehydrogenase	yes|down
Glyma.01G091400.Wm82.a4.v1	(1 of 20) 2.3.1.74 - Naringenin-chalcone synthase / Flavonone synthase	yes|up
Glyma.08G321500.Wm82.a4.v1	(1 of 7) PTHR13683:SF246 - ASPARTYL PROTEASE FAMILY PROTEIN	yes|up
Glyma.07G015600.Wm82.a4.v1	(1 of 7) PTHR28242//PTHR28242:SF4 - FAMILY NOT NAMED // HISTIDINE-CONTAINING PHOSPHOTRANSFER PROTEIN 4	yes|down
Glyma.09G188733.Wm82.a4.v1	(1 of 3) PTHR11814:SF54 - SULFATE TRANSPORTER 3.5-RELATED	yes|down
Glyma.07G025800.Wm82.a4.v1	(1 of 8) PTHR31194//PTHR31194:SF4 - SHN SHINE , DNA BINDING / TRANSCRIPTION FACTOR // ETHYLENE-RESPONSIVE TRANSCRIPTION FACTOR ERF003	yes|down
Glyma.13G363800.Wm82.a4.v1	(1 of 8) PF06232 - Embryo-specific protein 3, (ATS3) (ATS3)	yes|down
Glyma.16G059300.Wm82.a4.v1	(1 of 6) PTHR10891//PTHR10891:SF621 - EF-HAND CALCIUM-BINDING DOMAIN CONTAINING PROTEIN // SUBFAMILY NOT NAMED	yes|up
Glyma.02G076900.Wm82.a4.v1	(1 of 36) PTHR11017//PTHR11017:SF162 - LEUCINE-RICH REPEAT-CONTAINING PROTEIN // SUBFAMILY NOT NAMED	yes|down
Glyma.05G151200.Wm82.a4.v1	(1 of 2) 6.2.1.20 - Long-chain-fatty-acid--[acyl-carrier-protein] ligase / Acyl-[acyl-carrier-protein] synthetase	yes|down
Glyma.02G218300.Wm82.a4.v1	(1 of 6) 1.2.1.70 - Glutamyl-tRNA reductase	yes|down
Glyma.14G031200.Wm82.a4.v1	(1 of 4) 2.5.1.18//2.5.1.32 - Glutathione transferase / S-(hydroxyalkyl)glutathione lyase // 15-cis-phytoene synthase / PSase	yes|down
Glyma.11G185700.Wm82.a4.v1	(1 of 2) PTHR24296//PTHR24296:SF7 - FAMILY NOT NAMED // CYTOCHROME P450 94C1	yes|up
Glyma.08G312000.Wm82.a4.v1	(1 of 22) K13065 - shikimate O-hydroxycinnamoyltransferase (E2.3.1.133, HCT)	yes|down
Glyma.09G233800.Wm82.a4.v1	(1 of 349) PF00847 - AP2 domain (AP2)	yes|down
Glyma.04G179500.Wm82.a4.v1	(1 of 9) PTHR23201//PTHR23201:SF18 - EXTENSIN, PROLINE-RICH PROTEIN // SUBFAMILY NOT NAMED	yes|down
Glyma.01G131400.Wm82.a4.v1	(1 of 6) K12382 - saposin (PSAP, SGP1)	yes|down
Glyma.11G213500.Wm82.a4.v1	(1 of 13) PTHR14326 - TARGETING PROTEIN FOR XKLP2	yes|down
Glyma.07G266200.Wm82.a4.v1	(1 of 3) 3.1.3.25//3.1.3.93 - Inositol-phosphate phosphatase / Myo-inositol-1-phosphatase // L-galactose 1-phosphate phosphatase	yes|down
Glyma.09G039900.Wm82.a4.v1	(1 of 3) PTHR31052//PTHR31052:SF3 - FAMILY NOT NAMED // COBRA-LIKE PROTEIN 7-RELATED	yes|up
Glyma.02G088700.Wm82.a4.v1	(1 of 2) PTHR27005:SF13 - PROTEIN KINASE-LIKE PROTEIN-RELATED	yes|up
Glyma.10G061000.Wm82.a4.v1	(1 of 56) PF00314 - Thaumatin family (Thaumatin)	yes|up
Glyma.02G102700.Wm82.a4.v1	(1 of 6) PTHR13593:SF52 - F14J22.5 PROTEIN-RELATED	yes|down
Glyma.02G132700.Wm82.a4.v1	(1 of 4) PF08553 - VID27 cytoplasmic protein (VID27)	yes|down
Glyma.18G050600.Wm82.a4.v1	(1 of 6) K02866 - large subunit ribosomal protein L10e (RP-L10e, RPL10)	yes|up
Glyma.13G182800.Wm82.a4.v1	(1 of 30) PF06749 - Protein of unknown function (DUF1218) (DUF1218)	yes|down
Glyma.16G164300.Wm82.a4.v1	(1 of 182) 1.11.1.7 - Peroxidase / Lactoperoxidase	yes|down
Glyma.04G078000.Wm82.a4.v1	(1 of 155) K14488 - SAUR family protein (SAUR)	yes|down
Glyma.15G260700.Wm82.a4.v1	(1 of 17) PTHR13683:SF298 - ASPARTIC PROTEINASE CDR1-RELATED	yes|down
Glyma.07G206000.Wm82.a4.v1	(1 of 6) PTHR23213//PTHR23213:SF220 - FORMIN-RELATED // SUBFAMILY NOT NAMED	yes|down
Glyma.13G304400.Wm82.a4.v1	(1 of 4) PTHR31062:SF11 - XYLOGLUCAN ENDOTRANSGLUCOSYLASE/HYDROLASE PROTEIN 9	yes|down
Glyma.19G083200.Wm82.a4.v1	(1 of 5) PTHR11615//PTHR11615:SF81 - NITRATE, FROMATE, IRON DEHYDROGENASE // CASPARIAN STRIP MEMBRANE PROTEIN 5	yes|up
Glyma.18G253100.Wm82.a4.v1		yes|down
Glyma.01G198900.Wm82.a4.v1	(1 of 4) PTHR31500//PTHR31500:SF17 - FAMILY NOT NAMED // AT HOOK MOTIF DNA-BINDING FAMILY PROTEIN	yes|down
Glyma.20G142100.Wm82.a4.v1	(1 of 29) PTHR23177 - MKIAA1688 PROTEIN	yes|down
Glyma.03G244600.Wm82.a4.v1	(1 of 10) 2.3.1.196 - Benzyl alcohol O-benzoyltransferase	yes|down
Glyma.16G057500.Wm82.a4.v1	(1 of 13) PTHR24015//PTHR24015:SF419 - FAMILY NOT NAMED // NUCLEOTIDE-DIPHOSPHO-SUGAR TRANSFERASE DOMAIN-CONTAINING PROTEIN-RELATED	yes|down
Glyma.08G150500.Wm82.a4.v1	(1 of 4) 3.2.1.119//3.2.1.21 - Vicianin beta-glucosidase // Beta-glucosidase / Gentobiase	yes|down
Glyma.15G251300.Wm82.a4.v1	(1 of 5) 2.5.1.43 - Nicotianamine synthase	yes|up
Glyma.06G014500.Wm82.a4.v1	(1 of 2) PTHR31407//PTHR31407:SF17 - FAMILY NOT NAMED // PSBP DOMAIN-CONTAINING PROTEIN 3, CHLOROPLASTIC	yes|down
Glyma.19G165300.Wm82.a4.v1	(1 of 25) PF04852 - Protein of unknown function (DUF640) (DUF640)	yes|down
Glyma.12G032000.Wm82.a4.v1	(1 of 6) PTHR22950//PTHR22950:SF205 - AMINO ACID TRANSPORTER // AMINO ACID PERMEASE 3-RELATED	yes|down
Glyma.11G119000.Wm82.a4.v1	(1 of 9) PF10950 - Protein of unknown function (DUF2775) (DUF2775)	yes|up
Glyma.06G021700.Wm82.a4.v1	(1 of 5) PTHR31867//PTHR31867:SF4 - FAMILY NOT NAMED // EXPANSIN-A11	yes|down
Glyma.08G037200.Wm82.a4.v1	(1 of 2) PTHR11654//PTHR11654:SF58 - OLIGOPEPTIDE TRANSPORTER-RELATED // SUBFAMILY NOT NAMED	yes|down
Glyma.02G123800.Wm82.a4.v1	(1 of 3) PTHR31116:SF2 - 3-METHYLADENINE GLYCOSYLASE I-RELATED	yes|down
Glyma.04G180400.Wm82.a4.v1	(1 of 10) PTHR31236//PTHR31236:SF2 - FAMILY NOT NAMED // DEHYDRATION-RESPONSIVE PROTEIN RD22	yes|down
Glyma.06G115800.Wm82.a4.v1	(1 of 1) PTHR11706//PTHR11706:SF38 - MANGANESE TRANSPORTER // SUBFAMILY NOT NAMED	yes|up
Glyma.06G119600.Wm82.a4.v1		yes|down
Glyma.13G326100.Wm82.a4.v1	(1 of 63) K04733 - interleukin-1 receptor-associated kinase 4 (IRAK4)	yes|down
Glyma.02G114100.Wm82.a4.v1		yes|up
Glyma.05G220500.Wm82.a4.v1	(1 of 4) PTHR24286//PTHR24286:SF66 - FAMILY NOT NAMED // CYTOCHROME P450 FAMILY PROTEIN-RELATED	yes|down
Glyma.10G017000.Wm82.a4.v1	(1 of 5) PTHR22298:SF55 - ENDOGLUCANASE 1-RELATED	yes|down
Glyma.08G006267.Wm82.a4.v1	(1 of 3) PTHR11895:SF73 - AMIDASE FAMILY PROTEIN	yes|up
Glyma.19G190600.Wm82.a4.v1	(1 of 10) K13680 - beta-mannan synthase [EC:2.4.1.32] Man b1-4 Man (CSLA)	yes|down
Glyma.12G149600.Wm82.a4.v1	(1 of 2) PTHR12161//PTHR12161:SF20 - UNCHARACTERIZED DUF292 // SUBFAMILY NOT NAMED	yes|down
Glyma.15G099300.Wm82.a4.v1	(1 of 11) K01662 - 1-deoxy-D-xylulose-5-phosphate synthase (dxs)	yes|down
Glyma.03G022200.Wm82.a4.v1	(1 of 4) PTHR33601//PTHR33601:SF1 - FAMILY NOT NAMED // LITTLE ZIPPER 1 PROTEIN-RELATED	yes|down
Glyma.12G191700.Wm82.a4.v1	(1 of 8) PTHR13301//PTHR13301:SF53 - X-BOX TRANSCRIPTION FACTOR-RELATED // CELLULOSE SYNTHASE-LIKE PROTEIN B1-RELATED	yes|down
Glyma.10G006600.Wm82.a4.v1	(1 of 4) PTHR10641//PTHR10641:SF650 - MYB-LIKE DNA-BINDING PROTEIN MYB // SUBFAMILY NOT NAMED	yes|up
Glyma.04G245300.Wm82.a4.v1	(1 of 4) PTHR27001:SF44 - ADENINE NUCLEOTIDE ALPHA HYDROLASES-DOMAIN CONTAINING PROTEIN KINASE	yes|down
Glyma.07G129100.Wm82.a4.v1	(1 of 2) PTHR32191//PTHR32191:SF0 - FAMILY NOT NAMED // TETRASPANIN-2	yes|down
Glyma.14G001600.Wm82.a4.v1	(1 of 4) PTHR32002//PTHR32002:SF3 - FAMILY NOT NAMED // PROTEIN NLP1-RELATED	yes|down
Glyma.13G327500.Wm82.a4.v1	(1 of 3) PTHR10593//PTHR10593:SF45 - SERINE/THREONINE-PROTEIN KINASE RIO // SUBFAMILY NOT NAMED	yes|down
Glyma.13G251951.Wm82.a4.v1		yes|up
Glyma.15G262800.Wm82.a4.v1	(1 of 2) PTHR11040//PTHR11040:SF59 - ZINC/IRON TRANSPORTER // SUBFAMILY NOT NAMED	yes|up
Glyma.16G028100.Wm82.a4.v1	(1 of 2) PTHR23130//PTHR23130:SF78 - FAMILY NOT NAMED // CYTOCHROME B561/FERRIC REDUCTASE TRANSMEMBRANE WITH DOMON RELATED DOMAIN	yes|down
Glyma.16G045100.Wm82.a4.v1	(1 of 6) PTHR31062//PTHR31062:SF15 - FAMILY NOT NAMED // XYLOGLUCAN ENDOTRANSGLUCOSYLASE/HYDROLASE PROTEIN 4-RELATED	yes|down
Glyma.03G117000.Wm82.a4.v1	(1 of 131) PF00892 - EamA-like transporter family (EamA)	yes|down
Glyma.U031413.Wm82.a4.v1	(1 of 7) PTHR31235:SF39 - PEROXIDASE 3-RELATED	yes|up
Glyma.06G321900.Wm82.a4.v1	(1 of 2) K08905 - photosystem I subunit V (psaG)	yes|down
Glyma.08G159900.Wm82.a4.v1	(1 of 4) PTHR23118//PTHR23118:SF9 - ATP-CITRATE SYNTHASE // SUBFAMILY NOT NAMED	yes|down
Glyma.06G307100.Wm82.a4.v1	(1 of 3) PTHR11709//PTHR11709:SF106 - MULTI-COPPER OXIDASE // SUBFAMILY NOT NAMED	yes|down
Glyma.01G174400.Wm82.a4.v1	(1 of 11) PTHR23500:SF154 - POLYOL TRANSPORTER 3-RELATED	yes|down
Glyma.17G085200.Wm82.a4.v1	(1 of 74) PF00582 - Universal stress protein family (Usp)	yes|down
Glyma.20G030700.Wm82.a4.v1	(1 of 4) PTHR33133:SF7 - F26K24.10 PROTEIN	yes|up
Glyma.10G259800.Wm82.a4.v1	(1 of 2) PTHR23201//PTHR23201:SF15 - EXTENSIN, PROLINE-RICH PROTEIN // GIBBERELLIN-REGULATED PROTEIN 7	yes|down
Glyma.02G282500.Wm82.a4.v1	(1 of 4) PTHR31407:SF6 - OXYGEN-EVOLVING ENHANCER PROTEIN 2-1, CHLOROPLASTIC-RELATED	yes|down
Glyma.20G036100.Wm82.a4.v1	(1 of 7) PTHR11240:SF19 - F7A19.32 PROTEIN-RELATED	yes|up
Glyma.13G201400.Wm82.a4.v1	(1 of 35) PF07714//PF11721 - Protein tyrosine kinase (Pkinase_Tyr) // Di-glucose binding within endoplasmic reticulum (Malectin)	yes|up
Glyma.10G128932.Wm82.a4.v1		yes|up
Glyma.15G211500.Wm82.a4.v1	(1 of 44) PF00197 - Trypsin and protease inhibitor (Kunitz_legume)	yes|up
Glyma.04G153700.Wm82.a4.v1	(1 of 6) 2.4.1.12//2.4.1.29 - Cellulose synthase (UDP-forming) / UDP-glucose-cellulose glucosyltransferase // Cellulose synthase (GDP-forming) / GDP-glucose-cellulose glucosyltransferase	yes|down
Glyma.11G081700.Wm82.a4.v1	(1 of 112) PF13839//PF14416 - GDSL/SGNH-like Acyl-Esterase family found in Pmr5 and Cas1p (PC-Esterase) // PMR5 N terminal Domain (PMR5N)	yes|down
Glyma.06G307900.Wm82.a4.v1	(1 of 8) PTHR13301//PTHR13301:SF53 - X-BOX TRANSCRIPTION FACTOR-RELATED // CELLULOSE SYNTHASE-LIKE PROTEIN B1-RELATED	yes|up
Glyma.09G205400.Wm82.a4.v1	(1 of 2) PTHR32191//PTHR32191:SF14 - FAMILY NOT NAMED // PROTEIN TORNADO 2	yes|down
Glyma.20G191200.Wm82.a4.v1	(1 of 5) PTHR22924//PTHR22924:SF39 - LEGHEMOGLOBIN-RELATED // NON-SYMBIOTIC HEMOGLOBIN 2	yes|down
Glyma.19G167600.Wm82.a4.v1	(1 of 2) PTHR31284:SF15 - HAD SUPERFAMILY, SUBFAMILY IIIB ACID PHOSPHATASE	yes|down
Glyma.05G136100.Wm82.a4.v1	(1 of 4) PTHR11999//PTHR11999:SF105 - GROUP II PYRIDOXAL-5-PHOSPHATE DECARBOXYLASE // SUBFAMILY NOT NAMED	yes|up
Glyma.03G191700.Wm82.a4.v1	(1 of 3) PTHR21654//PTHR21654:SF5 - FAMILY NOT NAMED // TRIHELIX TRANSCRIPTION FACTOR PTL	yes|down
Glyma.01G085700.Wm82.a4.v1	(1 of 2) PTHR11926//PTHR11926:SF289 - GLUCOSYL/GLUCURONOSYL TRANSFERASES // SUBFAMILY NOT NAMED	yes|up
Glyma.16G196300.Wm82.a4.v1	(1 of 2) PTHR11362//PTHR11362:SF22 - PHOSPHATIDYLETHANOLAMINE-BINDING PROTEIN // PROTEIN BROTHER OF FT AND TFL 1	yes|down
Glyma.16G201200.Wm82.a4.v1	(1 of 63) K04733 - interleukin-1 receptor-associated kinase 4 (IRAK4)	yes|down
Glyma.07G133900.Wm82.a4.v1	(1 of 6) PTHR11709//PTHR11709:SF66 - MULTI-COPPER OXIDASE // LACCASE-17	yes|down
Glyma.11G155000.Wm82.a4.v1		yes|down
Glyma.07G093800.Wm82.a4.v1	(1 of 4) PTHR31042:SF16 - CORE-2/I-BRANCHING BETA-1,6-N-ACETYLGLUCOSAMINYLTRANSFERASE FAMILY PROTEIN	yes|down
Glyma.05G029700.Wm82.a4.v1	(1 of 4) PTHR11743//PTHR11743:SF35 - VOLTAGE-DEPENDENT ANION-SELECTIVE CHANNEL // SUBFAMILY NOT NAMED	yes|down
Glyma.04G008300.Wm82.a4.v1	(1 of 4) PTHR11627:SF16 - FRUCTOSE-BISPHOSPHATE ALDOLASE 1, CHLOROPLASTIC-RELATED	yes|down
Glyma.11G055100.Wm82.a4.v1	(1 of 8) PTHR24361:SF334 - MITOGEN-ACTIVATED PROTEIN KINASE KINASE KINASE 19-RELATED	yes|up
Glyma.09G026800.Wm82.a4.v1	(1 of 4) PTHR12863:SF3 - FATTY ACID 2-HYDROXYLASE 1-RELATED	yes|down
Glyma.19G086500.Wm82.a4.v1	(1 of 21) PTHR31238//PTHR31238:SF42 - FAMILY NOT NAMED // GERMIN-LIKE PROTEIN SUBFAMILY 1 MEMBER 10-RELATED	yes|up
Glyma.17G049800.Wm82.a4.v1	(1 of 4) PTHR31238//PTHR31238:SF21 - FAMILY NOT NAMED // GERMIN-LIKE PROTEIN SUBFAMILY 3 MEMBER 3	yes|down
Glyma.18G043200.Wm82.a4.v1	(1 of 13) PTHR14326 - TARGETING PROTEIN FOR XKLP2	yes|down
Glyma.17G177000.Wm82.a4.v1		yes|down
Glyma.10G251000.Wm82.a4.v1		yes|down
Glyma.02G132100.Wm82.a4.v1	(1 of 2) 1.7.7.1 - Ferredoxin--nitrite reductase	yes|down
Glyma.08G044800.Wm82.a4.v1	(1 of 3) PTHR36757//PTHR36757:SF1 - FAMILY NOT NAMED // GENOMIC DNA, CHROMOSOME 3, P1 CLONE: MYF24	yes|up
Glyma.02G006200.Wm82.a4.v1	(1 of 16) K14516 - ethylene-responsive transcription factor 1 (ERF1)	yes|up
Glyma.13G301900.Wm82.a4.v1	(1 of 36) PF12609 - Wound-induced protein (DUF3774)	yes|up
Glyma.17G054500.Wm82.a4.v1	(1 of 7) PTHR13878//PTHR13878:SF14 - GULONOLACTONE OXIDASE // SUBFAMILY NOT NAMED	yes|down
Glyma.02G028900.Wm82.a4.v1	(1 of 3) 3.4.24.65 - Macrophage elastase / Metalloelastase	yes|down
Glyma.08G166200.Wm82.a4.v1	(1 of 17) PTHR13683:SF298 - ASPARTIC PROTEINASE CDR1-RELATED	yes|down
Glyma.08G174700.Wm82.a4.v1	(1 of 4) PTHR11260//PTHR11260:SF195 - GLUTATHIONE S-TRANSFERASE, GST, SUPERFAMILY, GST DOMAIN CONTAINING // SUBFAMILY NOT NAMED	yes|down
Glyma.17G133400.Wm82.a4.v1	(1 of 5) PTHR10795//PTHR10795:SF369 - PROPROTEIN CONVERTASE SUBTILISIN/KEXIN // SUBFAMILY NOT NAMED	yes|down
Glyma.17G146900.Wm82.a4.v1	(1 of 12) PTHR31692:SF10 - EXPANSIN-LIKE B1	yes|up
Glyma.09G022800.Wm82.a4.v1	(1 of 13) PTHR31388//PTHR31388:SF22 - FAMILY NOT NAMED // PEROXIDASE 22-RELATED	yes|up
Glyma.05G083900.Wm82.a4.v1		yes|down
Glyma.01G106800.Wm82.a4.v1	(1 of 2) PTHR11527//PTHR11527:SF153 - SMALL HEAT-SHOCK PROTEIN HSP20 FAMILY // SUBFAMILY NOT NAMED	yes|down
Glyma.12G086100.Wm82.a4.v1	(1 of 16) PF07876 - Stress responsive A/B Barrel Domain (Dabb)	yes|down
Glyma.10G012900.Wm82.a4.v1	(1 of 4) PTHR33921//PTHR33921:SF2 - FAMILY NOT NAMED // CALVIN CYCLE PROTEIN CP12-1, CHLOROPLASTIC-RELATED	yes|down
Glyma.13G324300.Wm82.a4.v1		yes|down
Glyma.05G114000.Wm82.a4.v1	(1 of 2) PTHR31683:SF29 - PECTATE LYASE 11-RELATED	yes|down
Glyma.12G188900.Wm82.a4.v1	(1 of 4) PTHR22849//PTHR22849:SF0 - WDSAM1 PROTEIN // WD REPEAT, SAM AND U-BOX DOMAIN-CONTAINING PROTEIN 1	yes|up
Glyma.14G193400.Wm82.a4.v1	(1 of 14) K07300 - Ca2+:H+ antiporter (chaA, CAX)	yes|down
Glyma.10G089300.Wm82.a4.v1	(1 of 2) PTHR34940:SF1 - PHOTOSYSTEM II 5 KDA PROTEIN, CHLOROPLASTIC	yes|down
Glyma.18G263200.Wm82.a4.v1	(1 of 7) PTHR24223:SF181 - ABC TRANSPORTER C FAMILY MEMBER 3-RELATED	yes|down
Glyma.06G260200.Wm82.a4.v1	(1 of 3) PTHR11732//PTHR11732:SF226 - ALDO/KETO REDUCTASE // SUBFAMILY NOT NAMED	yes|down
Glyma.11G146272.Wm82.a4.v1	(1 of 3) PTHR27003//PTHR27003:SF94 - FAMILY NOT NAMED // RECEPTOR-LIKE PROTEIN KINASE HERK 1	yes|down
Glyma.02G249600.Wm82.a4.v1	(1 of 3) PTHR32429:SF12 - RIBULOSE BISPHOSPHATE CARBOXYLASE/OXYGENASE ACTIVASE, CHLOROPLASTIC	yes|down
Glyma.18G086600.Wm82.a4.v1	(1 of 33) K13457 - disease resistance protein RPM1 (RPM1, RPS3)	yes|up
Glyma.10G256100.Wm82.a4.v1		yes|down
Glyma.06G026300.Wm82.a4.v1	(1 of 3) PTHR32208:SF18 - GLYOXAL OXIDASE-RELATED PROTEIN	yes|down
Glyma.19G173800.Wm82.a4.v1	(1 of 131) PF00892 - EamA-like transporter family (EamA)	yes|down
Glyma.18G266700.Wm82.a4.v1	(1 of 2) PTHR11802//PTHR11802:SF43 - SERINE PROTEASE FAMILY S10 SERINE CARBOXYPEPTIDASE // SERINE CARBOXYPEPTIDASE-LIKE 25	yes|down
Glyma.08G088400.Wm82.a4.v1	(1 of 4) PTHR13301//PTHR13301:SF59 - X-BOX TRANSCRIPTION FACTOR-RELATED // CELLULOSE SYNTHASE A CATALYTIC SUBUNIT 7 [UDP-FORMING]	yes|down
Glyma.08G029400.Wm82.a4.v1	(1 of 12) PTHR12374//PTHR12374:SF19 - TRANSCRIPTIONAL ADAPTOR 2 ADA2 -RELATED // SUBFAMILY NOT NAMED	yes|down
Glyma.12G027100.Wm82.a4.v1	(1 of 8) PTHR11017//PTHR11017:SF167 - LEUCINE-RICH REPEAT-CONTAINING PROTEIN // SUBFAMILY NOT NAMED	yes|down
Glyma.07G271100.Wm82.a4.v1	(1 of 171) PF02365 - No apical meristem (NAM) protein (NAM)	yes|down
Glyma.12G182300.Wm82.a4.v1	(1 of 16) PF07876 - Stress responsive A/B Barrel Domain (Dabb)	yes|down
Glyma.02G061100.Wm82.a4.v1	(1 of 4) K02716 - photosystem II oxygen-evolving enhancer protein 1 (psbO)	yes|down
Glyma.14G222400.Wm82.a4.v1		yes|up
Glyma.18G110700.Wm82.a4.v1	(1 of 4) PTHR31719//PTHR31719:SF5 - FAMILY NOT NAMED // NAC DOMAIN-CONTAINING PROTEIN 6-RELATED	yes|up
Glyma.08G074000.Wm82.a4.v1	(1 of 3) K08917 - light-harvesting complex II chlorophyll a/b binding protein 6 (LHCB6)	yes|down
Glyma.04G230400.Wm82.a4.v1		yes|up
Glyma.05G146400.Wm82.a4.v1	(1 of 1) 3.2.1.106//3.2.1.20 - Mannosyl-oligosaccharide glucosidase / Processing A-glucosidase I // Alpha-glucosidase / Maltase-glucoamylase	yes|down
Glyma.11G066300.Wm82.a4.v1	(1 of 11) PTHR23500:SF154 - POLYOL TRANSPORTER 3-RELATED	yes|down
Glyma.12G053300.Wm82.a4.v1		yes|down
Glyma.20G164600.Wm82.a4.v1	(1 of 29) K01183 - chitinase (E3.2.1.14)	yes|down
Glyma.13G032000.Wm82.a4.v1	(1 of 2227) 2.7.11.1 - Non-specific serine/threonine protein kinase / Threonine-specific protein kinase	yes|up
Glyma.07G139100.Wm82.a4.v1	(1 of 5) PTHR11654:SF79 - PROTEIN NRT1/ PTR FAMILY 5.5-RELATED	yes|down
Glyma.18G265800.Wm82.a4.v1	(1 of 1) K04628 - 2-hydroxyacylsphingosine 1-beta-galactosyltransferase (CGT, UGT8)	yes|down
Glyma.17G128000.Wm82.a4.v1	(1 of 3) K01638 - malate synthase (E2.3.3.9, aceB, glcB)	yes|down
Glyma.10G094800.Wm82.a4.v1		yes|down
Glyma.04G079200.Wm82.a4.v1	(1 of 3) PF01152 - Bacterial-like globin (Bac_globin)	yes|down
Glyma.10G279476.Wm82.a4.v1	(1 of 5) 2.8.1.8 - Lipoyl synthase / Lipoate synthase	yes|up
Glyma.11G219000.Wm82.a4.v1	(1 of 11) PTHR10774//PTHR10774:SF58 - EXTENDED SYNAPTOTAGMIN-RELATED // SUBFAMILY NOT NAMED	yes|up
Glyma.05G204800.Wm82.a4.v1	(1 of 56) PF00314 - Thaumatin family (Thaumatin)	yes|down
Glyma.06G000400.Wm82.a4.v1	(1 of 4) PTHR32002//PTHR32002:SF3 - FAMILY NOT NAMED // PROTEIN NLP1-RELATED	yes|down
Glyma.14G213300.Wm82.a4.v1	(1 of 1) PTHR20852//PTHR20852:SF59//PTHR20852:SF62 - GLUTAMINE SYNTHETASE // SUBFAMILY NOT NAMED // GLUTAMINE SYNTHETASE CYTOSOLIC ISOZYME 1-3-RELATED	yes|down
Glyma.04G005200.Wm82.a4.v1	(1 of 18) KOG2922 - Uncharacterized conserved protein	yes|down
Glyma.05G057100.Wm82.a4.v1	(1 of 34) PF14547 - Hydrophobic seed protein (Hydrophob_seed)	yes|down
Glyma.08G356900.Wm82.a4.v1	(1 of 310) PF00010 - Helix-loop-helix DNA-binding domain (HLH)	yes|up
Glyma.17G097100.Wm82.a4.v1	(1 of 4) PTHR11743//PTHR11743:SF35 - VOLTAGE-DEPENDENT ANION-SELECTIVE CHANNEL // SUBFAMILY NOT NAMED	yes|down
Glyma.12G238300.Wm82.a4.v1		yes|down
Glyma.20G030600.Wm82.a4.v1	(1 of 4) PTHR33133:SF7 - F26K24.10 PROTEIN	yes|up
Glyma.06G248900.Wm82.a4.v1	(1 of 4) PTHR31719:SF34 - NAC DOMAIN-CONTAINING PROTEIN 19-RELATED	yes|down
Glyma.19G259700.Wm82.a4.v1	(1 of 3) PTHR31989//PTHR31989:SF45 - FAMILY NOT NAMED // NAC DOMAIN-CONTAINING PROTEIN 43-RELATED	yes|down
Glyma.04G235400.Wm82.a4.v1	(1 of 3) PTHR32295:SF33 - PROTEIN IQ-DOMAIN 21	yes|down
Glyma.07G057600.Wm82.a4.v1	(1 of 4) PTHR32285:SF9 - PROTEIN TRICHOME BIREFRINGENCE-LIKE 25-RELATED	yes|down
Glyma.20G125500.Wm82.a4.v1		yes|up
Glyma.05G040300.Wm82.a4.v1	(1 of 4) PTHR31268//PTHR31268:SF2 - FAMILY NOT NAMED // GALACTINOL--SUCROSE GALACTOSYLTRANSFERASE 5-RELATED	yes|down
Glyma.02G092600.Wm82.a4.v1	(1 of 82) PF04535 - Domain of unknown function (DUF588) (DUF588)	yes|down
Glyma.13G228200.Wm82.a4.v1	(1 of 2) PTHR31933:SF2 - O-FUCOSYLTRANSFERASE-LIKE PROTEIN	yes|down
Glyma.13G372200.Wm82.a4.v1	(1 of 5) 1.1.1.95 - Phosphoglycerate dehydrogenase / Phosphoglyceric acid dehydrogenase	yes|down
Glyma.15G138800.Wm82.a4.v1	(1 of 8) PTHR22847//PTHR22847:SF478 - WD40 REPEAT PROTEIN // SUBFAMILY NOT NAMED	yes|down
Glyma.02G270800.Wm82.a4.v1	(1 of 6) K13429 - chitin elicitor receptor kinase 1 (CERK1)	yes|up
Glyma.04G246400.Wm82.a4.v1	(1 of 6) PTHR22950//PTHR22950:SF205 - AMINO ACID TRANSPORTER // AMINO ACID PERMEASE 3-RELATED	yes|down
Glyma.10G037600.Wm82.a4.v1	(1 of 25) PF04852 - Protein of unknown function (DUF640) (DUF640)	yes|down
Glyma.02G265200.Wm82.a4.v1		yes|down
Glyma.03G040500.Wm82.a4.v1		yes|down
Glyma.17G234000.Wm82.a4.v1		yes|down
Glyma.19G086200.Wm82.a4.v1	(1 of 21) PTHR31238//PTHR31238:SF42 - FAMILY NOT NAMED // GERMIN-LIKE PROTEIN SUBFAMILY 1 MEMBER 10-RELATED	yes|up
Glyma.12G187600.Wm82.a4.v1	(1 of 8) PTHR31415//PTHR31415:SF2 - FAMILY NOT NAMED // LATE EMBRYOGENESIS ABUNDANT HYDROXYPROLINE-RICH GLYCOPROTEIN-RELATED	yes|down
Glyma.07G067700.Wm82.a4.v1	(1 of 3) PTHR11972//PTHR11972:SF41 - NADPH OXIDASE // FERRIC REDUCTION OXIDASE 2-RELATED	yes|up
Glyma.16G048802.Wm82.a4.v1	(1 of 10) PTHR23421:SF49 - BETA-GALACTOSIDASE 15-RELATED	yes|down
Glyma.11G171900.Wm82.a4.v1	(1 of 5) PTHR31342:SF9 - F10K1.18 PROTEIN	yes|down
Glyma.10G060800.Wm82.a4.v1	(1 of 56) PF00314 - Thaumatin family (Thaumatin)	yes|up
Glyma.06G065000.Wm82.a4.v1	(1 of 4) PTHR13301//PTHR13301:SF31 - X-BOX TRANSCRIPTION FACTOR-RELATED // CELLULOSE SYNTHASE A CATALYTIC SUBUNIT 8 [UDP-FORMING]	yes|down
Glyma.14G085600.Wm82.a4.v1	(1 of 3) PTHR12411//PTHR12411:SF352 - CYSTEINE PROTEASE FAMILY C1-RELATED // SUBFAMILY NOT NAMED	yes|down
Glyma.11G095100.Wm82.a4.v1	(1 of 122) 3.2.1.39 - Glucan endo-1,3-beta-D-glucosidase / Laminarinase	yes|down
Glyma.19G179800.Wm82.a4.v1	(1 of 16) PF07939 - Protein of unknown function (DUF1685) (DUF1685)	yes|down
Glyma.15G223500.Wm82.a4.v1	(1 of 3) PTHR31707//PTHR31707:SF21 - FAMILY NOT NAMED // PECTINESTERASE/PECTINESTERASE INHIBITOR 25-RELATED	yes|up
Glyma.05G121700.Wm82.a4.v1		yes|down
Glyma.05G050000.Wm82.a4.v1		yes|down
Glyma.06G160300.Wm82.a4.v1	(1 of 5) PTHR33147//PTHR33147:SF3 - FAMILY NOT NAMED // DEFENSIN-LIKE PROTEIN 6	yes|down
Glyma.11G162574.Wm82.a4.v1	(1 of 91) 3.2.1.15 - Polygalacturonase / Pectinase	yes|down
Glyma.07G039050.Wm82.a4.v1	(1 of 37) PF00190 - Cupin (Cupin_1)	yes|down
Glyma.08G133100.Wm82.a4.v1		yes|up
Glyma.09G029900.Wm82.a4.v1	(1 of 4) 6.2.1.1//6.2.1.2 - Acetate--CoA ligase / Acyl-activating enzyme // Butyrate--CoA ligase / Fatty acid thiokinase (medium chain)	yes|up
Glyma.11G066100.Wm82.a4.v1	(1 of 11) PTHR23500:SF154 - POLYOL TRANSPORTER 3-RELATED	yes|down
Glyma.11G203400.Wm82.a4.v1	(1 of 5) PTHR31645//PTHR31645:SF1 - FAMILY NOT NAMED // GB|AAD49762.1-RELATED	yes|down
Glyma.10G249500.Wm82.a4.v1	(1 of 6) PTHR23500:SF70 - SUGAR TRANSPORT PROTEIN 13	yes|down
Glyma.15G107100.Wm82.a4.v1	(1 of 1) PTHR11206//PTHR11206:SF140 - MULTIDRUG RESISTANCE PROTEIN // MATE EFFLUX FAMILY PROTEIN	yes|down
Glyma.11G195000.Wm82.a4.v1		yes|down
Glyma.03G160400.Wm82.a4.v1		yes|up
Glyma.01G125300.Wm82.a4.v1	(1 of 49) PTHR11017//PTHR11017:SF163 - LEUCINE-RICH REPEAT-CONTAINING PROTEIN // SUBFAMILY NOT NAMED	yes|up
Glyma.18G301100.Wm82.a4.v1	(1 of 8) PTHR10791//PTHR10791:SF34 - RAG1-ACTIVATING PROTEIN 1 // BIDIRECTIONAL SUGAR TRANSPORTER SWEET15	yes|down
Glyma.14G052300.Wm82.a4.v1		yes|down
Glyma.13G246600.Wm82.a4.v1	(1 of 12) K17871 - NADH:ubiquinone reductase (non-electrogenic) (ndh1)	yes|down
Glyma.16G001600.Wm82.a4.v1	(1 of 1) PTHR31444//PTHR31444:SF4 - FAMILY NOT NAMED // GLUCURONOXYLAN 4-O-METHYLTRANSFERASE 1	yes|down
Glyma.19G164300.Wm82.a4.v1	(1 of 3) PTHR24064//PTHR24064:SF279 - FAMILY NOT NAMED // MAJOR FACILITATOR PROTEIN-RELATED	yes|down
Glyma.01G077000.Wm82.a4.v1	(1 of 5) PTHR31692//PTHR31692:SF3 - FAMILY NOT NAMED // BETA EXPANSIN 6-RELATED	yes|down
Glyma.18G225100.Wm82.a4.v1	(1 of 12) 1.10.3.1 - Catechol oxidase / Tyrosinase	yes|down
Glyma.02G146700.Wm82.a4.v1	(1 of 30) PF05910 - Plant protein of unknown function (DUF868) (DUF868)	yes|down
Glyma.11G176200.Wm82.a4.v1	(1 of 2) 4.1.99.17 - Phosphomethylpyrimidine synthase	yes|down
Glyma.05G088400.Wm82.a4.v1	(1 of 3) PTHR24198//PTHR24198:SF85 - ANKYRIN REPEAT AND PROTEIN KINASE DOMAIN-CONTAINING PROTEIN // IKB-1	yes|down
Glyma.18G259400.Wm82.a4.v1	(1 of 4) PTHR23201:SF21 - GIBBERELLIN-REGULATED PROTEIN 4	yes|down
Glyma.11G239300.Wm82.a4.v1	(1 of 4) PTHR10788//PTHR10788:SF19 - TREHALOSE-6-PHOSPHATE SYNTHASE // TREHALOSE-PHOSPHATE PHOSPHATASE E-RELATED	yes|down
Glyma.07G058800.Wm82.a4.v1	(1 of 2) PTHR23416//PTHR23416:SF2 - SIALIC ACID SYNTHASE-RELATED // SERINE ACETYLTRANSFERASE 5	yes|up
Glyma.12G010100.Wm82.a4.v1	(1 of 6) PTHR11802:SF66 - SERINE CARBOXYPEPTIDASE-LIKE 36-RELATED	yes|down
Glyma.13G123000.Wm82.a4.v1	(1 of 349) PF00847 - AP2 domain (AP2)	yes|up
Glyma.06G176100.Wm82.a4.v1	(1 of 6) 1.14.13.120 - Costunolide synthase	yes|down
Glyma.06G019100.Wm82.a4.v1	(1 of 60) PF03087 - Arabidopsis protein of unknown function (DUF241)	yes|down
Glyma.01G018100.Wm82.a4.v1		yes|up
Glyma.15G123700.Wm82.a4.v1		yes|up
Glyma.14G159300.Wm82.a4.v1	(1 of 3) PTHR32295:SF33 - PROTEIN IQ-DOMAIN 21	yes|down
Glyma.10G115400.Wm82.a4.v1	(1 of 32) 1.14.13.121 - Premnaspirodiene oxygenase / Hyoscymus muticus premnaspirodiene oxygenase	yes|up
Glyma.02G028600.Wm82.a4.v1	(1 of 6) 3.4.24.7 - Interstitial collagenase / Vertebrate collagenase	yes|up
Glyma.19G162200.Wm82.a4.v1		yes|up
Glyma.08G084900.Wm82.a4.v1		yes|up
Glyma.13G153154.Wm82.a4.v1	(1 of 2) PTHR31238:SF48 - GERMIN-LIKE PROTEIN SUBFAMILY 3 MEMBER 2	yes|up
Glyma.04G063800.Wm82.a4.v1	(1 of 4) PTHR13301//PTHR13301:SF31 - X-BOX TRANSCRIPTION FACTOR-RELATED // CELLULOSE SYNTHASE A CATALYTIC SUBUNIT 8 [UDP-FORMING]	yes|down
Glyma.16G014300.Wm82.a4.v1		yes|down
Glyma.02G008900.Wm82.a4.v1	(1 of 154) K00430 - peroxidase (E1.11.1.7)	yes|up
Glyma.06G286700.Wm82.a4.v1	(1 of 10) PTHR11746//PTHR11746:SF83 - O-METHYLTRANSFERASE // SUBFAMILY NOT NAMED	yes|down
Glyma.15G012100.Wm82.a4.v1	(1 of 4) PTHR10209//PTHR10209:SF95 - OXIDOREDUCTASE, 2OG-FE II OXYGENASE FAMILY PROTEIN // GIBBERELLIN 3-BETA-DIOXYGENASE 1-RELATED	yes|up
Glyma.07G108400.Wm82.a4.v1	(1 of 25) PF00069//PF00954//PF01453 - Protein kinase domain (Pkinase) // S-locus glycoprotein domain (S_locus_glycop) // D-mannose binding lectin (B_lectin)	yes|up
Glyma.06G065600.Wm82.a4.v1	(1 of 1) K07192 - flotillin (FLOT)	yes|down
Glyma.05G223200.Wm82.a4.v1	(1 of 3) PTHR12161:SF13 - REGULATOR OF VPS4 ACTIVITY PROTEIN-RELATED	yes|down
Glyma.15G159900.Wm82.a4.v1		yes|up
Glyma.06G219600.Wm82.a4.v1	(1 of 13) K01246 - DNA-3-methyladenine glycosylase I (tag)	yes|down
Glyma.05G047100.Wm82.a4.v1	(1 of 6) PTHR10891//PTHR10891:SF621 - EF-HAND CALCIUM-BINDING DOMAIN CONTAINING PROTEIN // SUBFAMILY NOT NAMED	yes|up
Glyma.09G187000.Wm82.a4.v1	(1 of 2) PTHR15907//PTHR15907:SF47 - FAMILY NOT NAMED // PROTEIN PLANT CADMIUM RESISTANCE 11-RELATED	yes|down
Glyma.13G152746.Wm82.a4.v1	(1 of 12) 2.5.1.36 - Trihydroxypterocarpan dimethylallyltransferase / Glyceollin synthase	yes|up
Glyma.01G131100.Wm82.a4.v1	(1 of 2) K14455 - aspartate aminotransferase, mitochondrial (GOT2)	yes|up
Glyma.15G052400.Wm82.a4.v1	(1 of 3) K08917 - light-harvesting complex II chlorophyll a/b binding protein 6 (LHCB6)	yes|down
Glyma.03G007700.Wm82.a4.v1	(1 of 2) PTHR31235:SF13 - PEROXIDASE 28-RELATED	yes|down
Glyma.15G002200.Wm82.a4.v1	(1 of 2) 1.14.13.78 - Ent-kaurene oxidase	yes|down
Glyma.13G345100.Wm82.a4.v1	(1 of 2) PTHR10426//PTHR10426:SF21 - STRICTOSIDINE SYNTHASE-RELATED // POLLEN DEVELOPMENT PROTEIN LAP3	yes|up
Glyma.13G247000.Wm82.a4.v1	(1 of 36) PF12609 - Wound-induced protein (DUF3774)	yes|down
Glyma.14G080701.Wm82.a4.v1	(1 of 4) PTHR33348//PTHR33348:SF3 - FAMILY NOT NAMED // C-TERMINALLY ENCODED PEPTIDE 1	yes|down
Glyma.13G177100.Wm82.a4.v1		yes|down
Glyma.05G072600.Wm82.a4.v1	(1 of 3) PTHR10641//PTHR10641:SF509 - MYB-LIKE DNA-BINDING PROTEIN MYB // MYB TRANSCRIPTION FACTOR	yes|up
Glyma.09G277800.Wm82.a4.v1	(1 of 154) K00430 - peroxidase (E1.11.1.7)	yes|down
Glyma.11G026300.Wm82.a4.v1	(1 of 4) PTHR11206:SF127 - MATE EFFLUX FAMILY PROTEIN	yes|up
Glyma.03G042800.Wm82.a4.v1	(1 of 4) PTHR11615//PTHR11615:SF144 - NITRATE, FROMATE, IRON DEHYDROGENASE // SUBFAMILY NOT NAMED	yes|down
Glyma.08G021100.Wm82.a4.v1	(1 of 12) PF06376 - Protein of unknown function (DUF1070) (DUF1070)	yes|down
Glyma.07G200900.Wm82.a4.v1	(1 of 3) KOG3416 - Predicted nucleic acid binding protein	yes|up
Glyma.18G023600.Wm82.a4.v1	(1 of 4) PTHR11709:SF22 - LACCASE-12-RELATED	yes|down
Glyma.02G291200.Wm82.a4.v1	(1 of 249) PTHR14155 - RING FINGER DOMAIN-CONTAINING	yes|up
Glyma.03G201100.Wm82.a4.v1	(1 of 16) PTHR31415:SF4 - HARPIN-INDUCED PROTEIN-LIKE-RELATED	yes|up
Glyma.04G182600.Wm82.a4.v1	(1 of 4) PTHR13935//PTHR13935:SF59 - ACHAETE-SCUTE TRANSCRIPTION FACTOR-RELATED // SUBFAMILY NOT NAMED	yes|up
Glyma.17G083000.Wm82.a4.v1		yes|down
Glyma.06G265400.Wm82.a4.v1	(1 of 25) PF00931//PF07725//PF13676 - NB-ARC domain (NB-ARC) // Leucine Rich Repeat (LRR_3) // TIR domain (TIR_2)	yes|down
Glyma.16G045000.Wm82.a4.v1	(1 of 6) PTHR31062//PTHR31062:SF15 - FAMILY NOT NAMED // XYLOGLUCAN ENDOTRANSGLUCOSYLASE/HYDROLASE PROTEIN 4-RELATED	yes|down
Glyma.15G023500.Wm82.a4.v1	(1 of 4) PTHR18896//PTHR18896:SF79 - PHOSPHOLIPASE D // PHOSPHOLIPASE D EPSILON	yes|up
Glyma.10G279200.Wm82.a4.v1	(1 of 7) PTHR16007//PTHR16007:SF29 - EPIDIDYMAL MEMBRANE PROTEIN E9-RELATED // SUBFAMILY NOT NAMED	yes|down
Glyma.03G216000.Wm82.a4.v1	(1 of 6) PTHR31707:SF38 - PECTINESTERASE/PECTINESTERASE INHIBITOR 20-RELATED	yes|up
Glyma.19G248300.Wm82.a4.v1	(1 of 25) PF04852 - Protein of unknown function (DUF640) (DUF640)	yes|down
Glyma.11G235200.Wm82.a4.v1	(1 of 5) PTHR11654:SF155 - PROTEIN NRT1/ PTR FAMILY 5.1	yes|down
Glyma.06G029600.Wm82.a4.v1	(1 of 8) PTHR22952//PTHR22952:SF182 - CAMP-RESPONSE ELEMENT BINDING PROTEIN-RELATED // SUBFAMILY NOT NAMED	yes|down
Glyma.03G096500.Wm82.a4.v1	(1 of 4) PTHR10209:SF96 - 1-AMINOCYCLOPROPANE-1-CARBOXYLATE OXIDASE-LIKE PROTEIN-RELATED	yes|up
Glyma.01G182200.Wm82.a4.v1		yes|up
Glyma.05G205900.Wm82.a4.v1	(1 of 4) PTHR31775:SF5 - REMORIN FAMILY PROTEIN-RELATED	yes|down
Glyma.11G214500.Wm82.a4.v1	(1 of 4) PTHR22849//PTHR22849:SF43 - WDSAM1 PROTEIN // U-BOX DOMAIN-CONTAINING PROTEIN 54-RELATED	yes|up
Glyma.04G121700.Wm82.a4.v1	(1 of 12) 1.10.3.1 - Catechol oxidase / Tyrosinase	yes|up
Glyma.09G050600.Wm82.a4.v1	(1 of 2) PTHR11785:SF267 - CATIONIC AMINO ACID TRANSPORTER 5	yes|down
Glyma.06G216500.Wm82.a4.v1	(1 of 8) PF03386 - Early nodulin 93 ENOD93 protein (ENOD93)	yes|down
Glyma.03G067800.Wm82.a4.v1	(1 of 30) PF05003//PF11961 - Protein of unknown function (DUF668) (DUF668) // Domain of unknown function (DUF3475) (DUF3475)	yes|up
Glyma.10G097800.Wm82.a4.v1	(1 of 3) K03403 - magnesium chelatase subunit H (chlH, bchH)	yes|down
Glyma.04G207600.Wm82.a4.v1	(1 of 4) PTHR13780:SF48 - CBS DOMAIN-CONTAINING PROTEIN CBSCBSPB1-RELATED	yes|down
Glyma.17G172800.Wm82.a4.v1	(1 of 6) PTHR12154 - GLYCOSYL TRANSFERASE-RELATED	yes|up
Glyma.03G202600.Wm82.a4.v1	(1 of 6) PTHR22849:SF38 - E3 UBIQUITIN-PROTEIN LIGASE PUB22-RELATED	yes|up
Glyma.14G095400.Wm82.a4.v1	(1 of 6) 1.14.19.4 - Delta(8)-fatty-acid desaturase / SLD	yes|down
Glyma.04G015700.Wm82.a4.v1	(1 of 32) K08472 - mlo protein (MLO)	yes|up
Glyma.03G184500.Wm82.a4.v1	(1 of 4) PTHR31062:SF52 - XYLOGLUCAN ENDOTRANSGLUCOSYLASE/HYDROLASE PROTEIN 31-RELATED	yes|down
Glyma.05G069400.Wm82.a4.v1	(1 of 21) PF16913 - Purine nucleobase transmembrane transport (PUNUT)	yes|down
Glyma.18G218700.Wm82.a4.v1	(1 of 1) PTHR31852//PTHR31852:SF3 - FAMILY NOT NAMED // LATE EMBRYOGENESIS ABUNDANT (LEA) HYDROXYPROLINE-RICH GLYCOPROTEIN FAMILY	yes|down
Glyma.15G040000.Wm82.a4.v1	(1 of 4) PTHR10366//PTHR10366:SF323 - NAD DEPENDENT EPIMERASE/DEHYDRATASE // SUBFAMILY NOT NAMED	yes|down
Glyma.04G213900.Wm82.a4.v1	(1 of 1) PTHR11695:SF576 - ALCOHOL DEHYDROGENASE CLASS-P	yes|up
Glyma.08G037700.Wm82.a4.v1	(1 of 5) PTHR10460//PTHR10460:SF11 - ABL INTERACTOR // SUBFAMILY NOT NAMED	yes|down
Glyma.01G110100.Wm82.a4.v1	(1 of 19) PTHR33103//PTHR33103:SF4 - FAMILY NOT NAMED // EMB|CAB69840.1	yes|down
Glyma.10G198800.Wm82.a4.v1	(1 of 5) PTHR22924//PTHR22924:SF39 - LEGHEMOGLOBIN-RELATED // NON-SYMBIOTIC HEMOGLOBIN 2	yes|down
Glyma.17G208200.Wm82.a4.v1	(1 of 14) PF04862 - Protein of unknown function (DUF642) (DUF642)	yes|down
Glyma.19G132700.Wm82.a4.v1		yes|up
Glyma.07G249000.Wm82.a4.v1	(1 of 5) PTHR11064:SF42 - NUCLEAR TRANSCRIPTION FACTOR Y SUBUNIT B-5	yes|down
Glyma.07G098500.Wm82.a4.v1	(1 of 5) PTHR22814:SF34 - COPPER TRANSPORT PROTEIN-RELATED	yes|up
Glyma.08G171400.Wm82.a4.v1	(1 of 11) PTHR31568:SF17 - EXPRESSED PROTEIN	yes|up
Glyma.20G024200.Wm82.a4.v1	(1 of 8) PF02451 - Nodulin (Nodulin)	yes|down
Glyma.06G022500.Wm82.a4.v1	(1 of 6) PTHR10795//PTHR10795:SF328 - PROPROTEIN CONVERTASE SUBTILISIN/KEXIN // SUBFAMILY NOT NAMED	yes|down
Glyma.19G261000.Wm82.a4.v1	(1 of 20) PF07714//PF13947 - Protein tyrosine kinase (Pkinase_Tyr) // Wall-associated receptor kinase galacturonan-binding (GUB_WAK_bind)	yes|down
Glyma.13G359100.Wm82.a4.v1	(1 of 51) PF08477 - Ras of Complex, Roc, domain of DAPkinase (Roc)	yes|down
Glyma.06G106200.Wm82.a4.v1	(1 of 8) K17469 - sulfate transporter 2, low-affinity (SULTR2)	yes|down
Glyma.18G197400.Wm82.a4.v1	(1 of 9) PTHR11709:SF103 - LACCASE-16	yes|down
Glyma.01G152100.Wm82.a4.v1	(1 of 4) PTHR33101:SF2 - ROP GUANINE NUCLEOTIDE EXCHANGE FACTOR 14	yes|down
Glyma.20G098300.Wm82.a4.v1	(1 of 18) K01507 - inorganic pyrophosphatase (ppa)	yes|up
Glyma.01G128000.Wm82.a4.v1	(1 of 4) PTHR11615//PTHR11615:SF144 - NITRATE, FROMATE, IRON DEHYDROGENASE // SUBFAMILY NOT NAMED	yes|down
Glyma.08G249800.Wm82.a4.v1	(1 of 4) PTHR31673//PTHR31673:SF2 - FAMILY NOT NAMED // COBRA-LIKE PROTEIN 4	yes|down
Glyma.05G084100.Wm82.a4.v1		yes|down
Glyma.18G150000.Wm82.a4.v1	(1 of 2) PTHR11680:SF10 - SERINE HYDROXYMETHYLTRANSFERASE 1, MITOCHONDRIAL	yes|down
Glyma.13G341500.Wm82.a4.v1	(1 of 8) PTHR27000:SF151 - DNA-DAMAGE-REPAIR/TOLERATION PROTEIN DRT100-RELATED	yes|down
Glyma.11G222300.Wm82.a4.v1	(1 of 2) PF08659//PF13561 - KR domain (KR) // Enoyl-(Acyl carrier protein) reductase (adh_short_C2)	yes|down
Glyma.09G190700.Wm82.a4.v1	(1 of 4) PTHR23023//PTHR23023:SF108 - DIMETHYLANILINE MONOOXYGENASE // SUBFAMILY NOT NAMED	yes|up
Glyma.10G036800.Wm82.a4.v1	(1 of 3) PTHR24064//PTHR24064:SF279 - FAMILY NOT NAMED // MAJOR FACILITATOR PROTEIN-RELATED	yes|down
Glyma.16G146700.Wm82.a4.v1	(1 of 8) K15102 - solute carrier family 25 (mitochondrial phosphate transporter), member 3 (SLC25A3, PHC, PIC)	yes|up
Glyma.13G046200.Wm82.a4.v1	(1 of 4) K01602 - ribulose-bisphosphate carboxylase small chain (rbcS)	yes|down
Glyma.20G044100.Wm82.a4.v1	(1 of 5) PTHR10992//PTHR10992:SF841 - ALPHA/BETA HYDROLASE FOLD-CONTAINING PROTEIN // SUBFAMILY NOT NAMED	yes|up
Glyma.02G248100.Wm82.a4.v1	(1 of 11) PTHR10774//PTHR10774:SF58 - EXTENDED SYNAPTOTAGMIN-RELATED // SUBFAMILY NOT NAMED	yes|up
Glyma.08G229100.Wm82.a4.v1	(1 of 2227) 2.7.11.1 - Non-specific serine/threonine protein kinase / Threonine-specific protein kinase	yes|down
Glyma.19G022200.Wm82.a4.v1	(1 of 6) PTHR31948:SF12 - MINI ZINC FINGER PROTEIN 2	yes|down
Glyma.13G098400.Wm82.a4.v1	(1 of 5) PTHR31517//PTHR31517:SF10 - FAMILY NOT NAMED // PEROXIDASE 16-RELATED	yes|up
Glyma.06G132200.Wm82.a4.v1		yes|down
Glyma.07G134100.Wm82.a4.v1	(1 of 2) PTHR11709:SF62 - LACCASE-2	yes|down
Glyma.13G328900.Wm82.a4.v1		yes|down
Glyma.13G168500.Wm82.a4.v1	(1 of 3) PTHR11615//PTHR11615:SF135 - NITRATE, FROMATE, IRON DEHYDROGENASE // SUBFAMILY NOT NAMED	yes|down
Glyma.20G164200.Wm82.a4.v1	(1 of 25) PF00069//PF00954//PF01453 - Protein kinase domain (Pkinase) // S-locus glycoprotein domain (S_locus_glycop) // D-mannose binding lectin (B_lectin)	yes|down
Glyma.13G295000.Wm82.a4.v1	(1 of 3) 2.6.1.80 - Nicotianamine aminotransferase / Nicotianamine transaminase	yes|down
Glyma.12G190900.Wm82.a4.v1	(1 of 10) PTHR33264//PTHR33264:SF5 - FAMILY NOT NAMED // EXPRESSED PROTEIN-RELATED	yes|down
Glyma.19G189400.Wm82.a4.v1		yes|down
Glyma.18G177400.Wm82.a4.v1	(1 of 6) PTHR11709//PTHR11709:SF66 - MULTI-COPPER OXIDASE // LACCASE-17	yes|down
Glyma.07G157100.Wm82.a4.v1	(1 of 13) PTHR21495//PTHR21495:SF77 - NUCLEOPORIN-RELATED // DIRIGENT PROTEIN 19	yes|down
Glyma.04G022900.Wm82.a4.v1	(1 of 12) PTHR22835:SF184 - GDSL ESTERASE/LIPASE EXL1-RELATED	yes|down
Glyma.07G051800.Wm82.a4.v1	(1 of 235) PF02519 - Auxin responsive protein (Auxin_inducible)	yes|up
Glyma.07G219900.Wm82.a4.v1	(1 of 5) PTHR23180//PTHR23180:SF290 - CENTAURIN/ARF // C2 DOMAIN-CONTAINING PROTEIN-RELATED	yes|down
Glyma.02G295300.Wm82.a4.v1	(1 of 3) K18848 - indole-3-acetate O-methyltransferase (IAMT1)	yes|down
Glyma.02G021500.Wm82.a4.v1	(1 of 7) PTHR10264//PTHR10264:SF93 - BAND 7 PROTEIN-RELATED // SUBFAMILY NOT NAMED	yes|down
Glyma.19G066700.Wm82.a4.v1	(1 of 3) PTHR12266//PTHR12266:SF2 - NA+/CA2+ K+ INDEPENDENT EXCHANGER // CATION/CALCIUM EXCHANGER 1	yes|down
Glyma.08G196900.Wm82.a4.v1	(1 of 15) K14664 - IAA-amino acid hydrolase [EC:3.5.1.-] (ILR1)	yes|down
Glyma.04G244100.Wm82.a4.v1	(1 of 11) PF00069//PF13947 - Protein kinase domain (Pkinase) // Wall-associated receptor kinase galacturonan-binding (GUB_WAK_bind)	yes|down
Glyma.08G044200.Wm82.a4.v1	(1 of 6) PF00069//PF14380 - Protein kinase domain (Pkinase) // Wall-associated receptor kinase C-terminal (WAK_assoc)	yes|down
Glyma.12G176200.Wm82.a4.v1		yes|down
Glyma.20G121800.Wm82.a4.v1	(1 of 2) K18753 - butyrate response factor 1 (ZFP36L)	yes|down
Glyma.10G121000.Wm82.a4.v1	(1 of 100) PF14368 - Probable lipid transfer (LTP_2)	yes|down
Glyma.20G063100.Wm82.a4.v1	(1 of 2) PTHR11040:SF35 - ZINC TRANSPORTER 3-RELATED	yes|up
Glyma.14G178200.Wm82.a4.v1	(1 of 17) K10664 - E3 ubiquitin-protein ligase ATL6/9/15/31/42/55 [EC:6.3.2.19] (ATL6S)	yes|down
Glyma.01G185000.Wm82.a4.v1		yes|up
Glyma.10G199100.Wm82.a4.v1	(1 of 5) PTHR22924//PTHR22924:SF39 - LEGHEMOGLOBIN-RELATED // NON-SYMBIOTIC HEMOGLOBIN 2	yes|down
Glyma.14G162100.Wm82.a4.v1	(1 of 2) PTHR13832//PTHR13832:SF326 - PROTEIN PHOSPHATASE 2C // SUBFAMILY NOT NAMED	yes|down
Glyma.02G109100.Wm82.a4.v1	(1 of 74) PF01357//PF03330 - Pollen allergen (Pollen_allerg_1) // Rare lipoprotein A (RlpA)-like double-psi beta-barrel (DPBB_1)	yes|down
Glyma.17G113000.Wm82.a4.v1	(1 of 5) PTHR33021//PTHR33021:SF55 - FAMILY NOT NAMED // BLUE COPPER PROTEIN	yes|up
Glyma.16G197200.Wm82.a4.v1	(1 of 4) PTHR10108//PTHR10108:SF861 - METHYLTRANSFERASE // SUBFAMILY NOT NAMED	yes|down
Glyma.14G084600.Wm82.a4.v1	(1 of 4) PTHR24326//PTHR24326:SF263 - FAMILY NOT NAMED // WUSCHEL-RELATED HOMEOBOX 4	yes|down
Glyma.16G048600.Wm82.a4.v1		yes|down
Glyma.12G216500.Wm82.a4.v1		yes|down
Glyma.01G217600.Wm82.a4.v1	(1 of 56) PF00314 - Thaumatin family (Thaumatin)	yes|up
Glyma.16G017100.Wm82.a4.v1	(1 of 4) PTHR31140//PTHR31140:SF4 - FAMILY NOT NAMED // B3 DOMAIN-CONTAINING TRANSCRIPTION FACTOR NGA1-RELATED	yes|down
Glyma.14G051800.Wm82.a4.v1	(1 of 5) PTHR10891//PTHR10891:SF615 - EF-HAND CALCIUM-BINDING DOMAIN CONTAINING PROTEIN // SUBFAMILY NOT NAMED	yes|up
Glyma.03G162600.Wm82.a4.v1	(1 of 349) PF00847 - AP2 domain (AP2)	yes|up
Glyma.10G163800.Wm82.a4.v1		yes|down
Glyma.15G236200.Wm82.a4.v1	(1 of 4) PTHR26402//PTHR26402:SF574 - RESPONSE REGULATOR OF TWO-COMPONENT SYSTEM // SUBFAMILY NOT NAMED	yes|down
Glyma.11G128800.Wm82.a4.v1	(1 of 2) PTHR36707//PTHR36707:SF1 - FAMILY NOT NAMED // T20M3.17 PROTEIN	yes|down
Glyma.11G224200.Wm82.a4.v1	(1 of 5) PF00854//PF07690 - POT family (PTR2) // Major Facilitator Superfamily (MFS_1)	yes|down
Glyma.13G191400.Wm82.a4.v1	(1 of 6) PTHR11783//PTHR11783:SF89 - SULFOTRANSFERASE SULT // SUBFAMILY NOT NAMED	yes|up
Glyma.06G303300.Wm82.a4.v1	(1 of 106) PF03168 - Late embryogenesis abundant protein (LEA_2)	yes|down
Glyma.20G159400.Wm82.a4.v1	(1 of 4) PTHR33649:SF2 - PAR1 PROTEIN	yes|down
Glyma.20G203800.Wm82.a4.v1		yes|down
Glyma.07G067000.Wm82.a4.v1	(1 of 5) PTHR31339:SF12 - POLYGALACTURONASE-LIKE PROTEIN	yes|down
Glyma.06G145200.Wm82.a4.v1	(1 of 5) PTHR11654:SF155 - PROTEIN NRT1/ PTR FAMILY 5.1	yes|down
Glyma.13G262800.Wm82.a4.v1	(1 of 17) PTHR32212//PTHR32212:SF126 - FAMILY NOT NAMED // EMB|CAB62440.1-RELATED	yes|down
Glyma.13G172600.Wm82.a4.v1	(1 of 2) PTHR24072//PTHR24072:SF178 - RHO FAMILY GTPASE // SUBFAMILY NOT NAMED	yes|down
Glyma.17G050200.Wm82.a4.v1	(1 of 22) PF08879//PF08880 - WRC (WRC) // QLQ (QLQ)	yes|down
Glyma.01G028500.Wm82.a4.v1		yes|down
Glyma.05G187900.Wm82.a4.v1	(1 of 131) PF00892 - EamA-like transporter family (EamA)	yes|down
Glyma.08G211100.Wm82.a4.v1	(1 of 2) PTHR10374//PTHR10374:SF18 - LACTOYLGLUTATHIONE LYASE GLYOXALASE I // SUBFAMILY NOT NAMED	yes|down
Glyma.16G121700.Wm82.a4.v1	(1 of 7) PTHR10869:SF78 - 2-OXOGLUTARATE (2OG) AND FE(II)-DEPENDENT OXYGENASE SUPERFAMILY PROTEIN	yes|down
Glyma.06G187100.Wm82.a4.v1	(1 of 1) KOG1922 - Rho GTPase effector BNI1 and related formins	yes|down
Glyma.06G008000.Wm82.a4.v1	(1 of 6) PTHR24115//PTHR24115:SF405 - FAMILY NOT NAMED // ATP BINDING MICROTUBULE MOTOR FAMILY PROTEIN	yes|down
Glyma.01G129700.Wm82.a4.v1		yes|down
Glyma.13G051000.Wm82.a4.v1	(1 of 1) PTHR11055//PTHR11055:SF25 - ADENYLSULFATE KINASE/SULFATE ADENYLTRANSFERASE // ATP SULFURYLASE 2	yes|down
Glyma.20G236100.Wm82.a4.v1	(1 of 5) PTHR23213//PTHR23213:SF177 - FORMIN-RELATED // FORMIN-LIKE PROTEIN 11	yes|down
Glyma.09G037600.Wm82.a4.v1		yes|down
Glyma.14G189500.Wm82.a4.v1	(1 of 4) PTHR22814//PTHR22814:SF51 - COPPER TRANSPORT PROTEIN ATOX1-RELATED // HEAVY METAL TRANSPORT/DETOXIFICATION DOMAIN-CONTAINING PROTEIN	yes|down
Glyma.08G012800.Wm82.a4.v1	(1 of 4) PTHR31775:SF5 - REMORIN FAMILY PROTEIN-RELATED	yes|down
Glyma.06G296000.Wm82.a4.v1	(1 of 2) PTHR12771//PTHR12771:SF17 - ENGULFMENT AND CELL MOTILITY // SUBFAMILY NOT NAMED	yes|down
Glyma.01G115600.Wm82.a4.v1	(1 of 65) PF03140 - Plant protein of unknown function (DUF247)	yes|down
Glyma.08G056400.Wm82.a4.v1	(1 of 3) 1.11.1.7//3.1.3.2 - Peroxidase / Lactoperoxidase // Acid phosphatase / Phosphomonoesterase	yes|down
Glyma.08G012700.Wm82.a4.v1	(1 of 16) K09377 - cysteine and glycine-rich protein (CSRP)	yes|down
Glyma.13G229800.Wm82.a4.v1	(1 of 112) PF13839//PF14416 - GDSL/SGNH-like Acyl-Esterase family found in Pmr5 and Cas1p (PC-Esterase) // PMR5 N terminal Domain (PMR5N)	yes|down
Glyma.03G063900.Wm82.a4.v1	(1 of 5) PTHR22950//PTHR22950:SF256 - AMINO ACID TRANSPORTER // AUXIN TRANSPORTER PROTEIN 1-RELATED	yes|down
Glyma.05G029200.Wm82.a4.v1	(1 of 3) 1.2.1.88//1.5.1.12 - L-glutamate gamma-semialdehyde dehydrogenase / Pyrroline-5-carboxylate dehydrogenase // Transferred entry: 1.2.1.88	yes|down
Glyma.15G015100.Wm82.a4.v1	(1 of 3) 2.7.11.1//3.2.1.14 - Non-specific serine/threonine protein kinase / Threonine-specific protein kinase // Chitinase / Poly-beta-glucosaminidase	yes|up
Glyma.13G328800.Wm82.a4.v1	(1 of 8) PF02451 - Nodulin (Nodulin)	yes|down
Glyma.20G144300.Wm82.a4.v1	(1 of 6) PTHR23500:SF70 - SUGAR TRANSPORT PROTEIN 13	yes|down
Glyma.14G158600.Wm82.a4.v1	(1 of 6) PF00069//PF07645//PF13947 - Protein kinase domain (Pkinase) // Calcium-binding EGF domain (EGF_CA) // Wall-associated receptor kinase galacturonan-binding (GUB_WAK_bind)	yes|up
Glyma.17G139700.Wm82.a4.v1	(1 of 1) PF07172//PF14547 - Glycine rich protein family (GRP) // Hydrophobic seed protein (Hydrophob_seed)	yes|down
Glyma.07G038800.Wm82.a4.v1	(1 of 57) PF07883 - Cupin domain (Cupin_2)	yes|down
Glyma.08G049600.Wm82.a4.v1		yes|up
Glyma.08G175400.Wm82.a4.v1	(1 of 5) 2.5.1.43 - Nicotianamine synthase	yes|up
Glyma.19G222200.Wm82.a4.v1	(1 of 4) PTHR10641//PTHR10641:SF465 - MYB-LIKE DNA-BINDING PROTEIN MYB // MYB TRANSCRIPTION FACTOR	yes|down
Glyma.06G160400.Wm82.a4.v1	(1 of 5) PTHR33147//PTHR33147:SF3 - FAMILY NOT NAMED // DEFENSIN-LIKE PROTEIN 6	yes|down
Glyma.18G187600.Wm82.a4.v1	(1 of 8) PTHR11732:SF223 - ALDO-KETO REDUCTASE FAMILY 4 MEMBER C10	yes|down
Glyma.12G097700.Wm82.a4.v1	(1 of 3) PTHR11709//PTHR11709:SF106 - MULTI-COPPER OXIDASE // SUBFAMILY NOT NAMED	yes|down
Glyma.08G075900.Wm82.a4.v1	(1 of 10) PTHR31851:SF6 - VACUOLAR IRON TRANSPORTER HOMOLOG 2.1	yes|up
Glyma.17G011600.Wm82.a4.v1	(1 of 11) PF03595 - Voltage-dependent anion channel (SLAC1)	yes|up
Glyma.08G110801.Wm82.a4.v1	(1 of 20) 2.3.1.74 - Naringenin-chalcone synthase / Flavonone synthase	yes|up
Glyma.15G228000.Wm82.a4.v1		yes|down
Glyma.11G066000.Wm82.a4.v1	(1 of 11) PTHR23500:SF154 - POLYOL TRANSPORTER 3-RELATED	yes|down
Glyma.19G251500.Wm82.a4.v1	(1 of 1) PTHR10795:SF393 - CUCUMISIN	yes|down
Glyma.10G184500.Wm82.a4.v1		yes|down
Glyma.06G109200.Wm82.a4.v1	(1 of 1) 1.7.1.1//1.7.99.4 - Nitrate reductase (NADH) / Nitrate reductase (NADH(2)) // Nitrate reductase / Respiratory nitrate reductase	yes|down
Glyma.09G275400.Wm82.a4.v1	(1 of 2) PTHR21495//PTHR21495:SF48 - NUCLEOPORIN-RELATED // SUBFAMILY NOT NAMED	yes|up
Glyma.11G085200.Wm82.a4.v1	(1 of 2) PTHR21495//PTHR21495:SF60 - NUCLEOPORIN-RELATED // SUBFAMILY NOT NAMED	yes|up
Glyma.13G095000.Wm82.a4.v1	(1 of 9) PTHR31062//PTHR31062:SF32 - FAMILY NOT NAMED // XYLOGLUCAN ENDOTRANSGLUCOSYLASE/HYDROLASE PROTEIN 25-RELATED	yes|down
Glyma.16G177700.Wm82.a4.v1	(1 of 3) PF00646//PF05641 - F-box domain (F-box) // Agenet domain (Agenet)	yes|down
Glyma.15G048400.Wm82.a4.v1	(1 of 5) PTHR21596:SF12 - PROTEIN SUPPRESSOR OF GENE SILENCING 3	yes|down
Glyma.18G173300.Wm82.a4.v1		yes|down
Glyma.19G033600.Wm82.a4.v1	(1 of 4) PTHR31673//PTHR31673:SF2 - FAMILY NOT NAMED // COBRA-LIKE PROTEIN 4	yes|down
Glyma.01G173900.Wm82.a4.v1	(1 of 20) PTHR24078:SF177 - PROTEIN DNJ-23-RELATED	yes|up
Glyma.06G234000.Wm82.a4.v1	(1 of 4) PTHR18966//PTHR18966:SF209 - IONOTROPIC GLUTAMATE RECEPTOR // SUBFAMILY NOT NAMED	yes|up
Glyma.05G022900.Wm82.a4.v1	(1 of 1) K02694 - photosystem I subunit III (psaF)	yes|down
Glyma.17G010200.Wm82.a4.v1	(1 of 4) PTHR11850//PTHR11850:SF100 - HOMEOBOX PROTEIN TRANSCRIPTION FACTORS // HOMEOBOX PROTEIN SHOOT MERISTEMLESS	yes|down
Glyma.16G046651.Wm82.a4.v1		yes|down
Glyma.10G128866.Wm82.a4.v1	(1 of 5) PTHR27004:SF17 - RECEPTOR LIKE PROTEIN 1	yes|up
Glyma.17G011700.Wm82.a4.v1	(1 of 17) PF14476 - Petal formation-expressed (Chloroplast_duf)	yes|up
Glyma.19G259400.Wm82.a4.v1	(1 of 8) 1.1.3.37//1.1.3.8 - D-arabinono-1,4-lactone oxidase / D-arabinono-gamma-lactone oxidase // L-gulonolactone oxidase / L-gulono-gamma-lactone oxidase	yes|down
Glyma.12G189300.Wm82.a4.v1	(1 of 4) PTHR33155//PTHR33155:SF3 - FAMILY NOT NAMED // PROTEIN FAF-LIKE, CHLOROPLASTIC-RELATED	yes|down
Glyma.10G121524.Wm82.a4.v1	(1 of 2) 1.7.3.3 - Factor independent urate hydroxylase / Uricase II	yes|down
Glyma.18G241700.Wm82.a4.v1	(1 of 2) K02699 - photosystem I subunit XI (psaL)	yes|down
Glyma.03G132700.Wm82.a4.v1	(1 of 5) PTHR32227:SF49 - BETA-1,3-GLUCANASE 1-RELATED	yes|down
Glyma.02G042500.Wm82.a4.v1	(1 of 3) PTHR22595//PTHR22595:SF34 - CHITINASE-RELATED // BASIC ENDOCHITINASE B	yes|down
Glyma.10G126051.Wm82.a4.v1		yes|down
Glyma.11G181100.Wm82.a4.v1	(1 of 1) PTHR36311//PTHR36311:SF1 - FAMILY NOT NAMED // PHOTOSYSTEM I SUBUNIT O	yes|down
Glyma.15G275600.Wm82.a4.v1	(1 of 2) PTHR34940:SF1 - PHOTOSYSTEM II 5 KDA PROTEIN, CHLOROPLASTIC	yes|down
Glyma.14G177600.Wm82.a4.v1	(1 of 85) PF02298 - Plastocyanin-like domain (Cu_bind_like)	yes|down
Glyma.11G226900.Wm82.a4.v1	(1 of 2) 3.1.3.37 - Sedoheptulose-bisphosphatase / Sedoheptulose-1,7-bisphosphatase	yes|down
Glyma.17G098700.Wm82.a4.v1	(1 of 5) K10436 - microtubule-associated protein, RP/EB family (MAPRE)	yes|down
Glyma.08G216300.Wm82.a4.v1	(1 of 5) PTHR24006//PTHR24006:SF492 - FAMILY NOT NAMED // F-BOX/LRR-REPEAT PROTEIN 5	yes|up
Glyma.01G007000.Wm82.a4.v1	(1 of 4) PTHR32295//PTHR32295:SF22 - FAMILY NOT NAMED // PROTEIN IQ-DOMAIN 25	yes|down
Glyma.02G055000.Wm82.a4.v1		yes|up
Glyma.10G260900.Wm82.a4.v1	(1 of 5) K15923 - alpha-L-fucosidase 2 (AXY8, FUC95A, afcA)	yes|down
Glyma.02G224600.Wm82.a4.v1	(1 of 4) PTHR11654//PTHR11654:SF166 - OLIGOPEPTIDE TRANSPORTER-RELATED // SUBFAMILY NOT NAMED	yes|down
Glyma.19G074000.Wm82.a4.v1	(1 of 8) PF02451 - Nodulin (Nodulin)	yes|down
Glyma.10G170900.Wm82.a4.v1	(1 of 3) PTHR31126//PTHR31126:SF19 - FAMILY NOT NAMED // ATYPICAL DUAL-SPECIFICITY PHOSPHATASE	yes|up
Glyma.15G265500.Wm82.a4.v1	(1 of 2) PTHR13683//PTHR13683:SF280 - ASPARTYL PROTEASES // ASPARTYL PROTEASE FAMILY PROTEIN	yes|down
Glyma.16G145300.Wm82.a4.v1	(1 of 3) PTHR11802//PTHR11802:SF71 - SERINE PROTEASE FAMILY S10 SERINE CARBOXYPEPTIDASE // SERINE CARBOXYPEPTIDASE-LIKE 26-RELATED	yes|down
Glyma.09G179700.Wm82.a4.v1		yes|up
Glyma.19G086000.Wm82.a4.v1	(1 of 21) PTHR31238//PTHR31238:SF42 - FAMILY NOT NAMED // GERMIN-LIKE PROTEIN SUBFAMILY 1 MEMBER 10-RELATED	yes|up
Glyma.06G250901.Wm82.a4.v1	(1 of 7) PTHR34053//PTHR34053:SF1 - FAMILY NOT NAMED // PROTEIN ULTRAPETALA 1-RELATED	yes|down
Glyma.10G108400.Wm82.a4.v1	(1 of 5) K13495 - cis-zeatin O-glucosyltransferase (CISZOG)	yes|up
Glyma.17G133500.Wm82.a4.v1	(1 of 5) PTHR10795//PTHR10795:SF369 - PROPROTEIN CONVERTASE SUBTILISIN/KEXIN // SUBFAMILY NOT NAMED	yes|down
Glyma.02G052000.Wm82.a4.v1	(1 of 1) PTHR10108//PTHR10108:SF797 - METHYLTRANSFERASE // METHYLTRANSFERASE PMT27-RELATED	yes|down
Glyma.12G159800.Wm82.a4.v1		yes|down
Glyma.16G207700.Wm82.a4.v1	(1 of 3) K15777 - 4,5-DOPA dioxygenase extradiol (DOPA)	yes|up
Glyma.10G104767.Wm82.a4.v1	(1 of 5) PTHR33101:SF1 - ROP GUANINE NUCLEOTIDE EXCHANGE FACTOR 7	yes|down
Glyma.07G103900.Wm82.a4.v1	(1 of 16) PTHR31415:SF4 - HARPIN-INDUCED PROTEIN-LIKE-RELATED	yes|up
Glyma.16G177500.Wm82.a4.v1	(1 of 4) PTHR12064//PTHR12064:SF36 - ANCIENT CONSERVED DOMAIN PROTEIN-RELATED // SUBFAMILY NOT NAMED	yes|down
Glyma.03G158700.Wm82.a4.v1	(1 of 55) K14484 - auxin-responsive protein IAA (IAA)	yes|down
Glyma.19G198600.Wm82.a4.v1	(1 of 16) PTHR31415:SF4 - HARPIN-INDUCED PROTEIN-LIKE-RELATED	yes|up
Glyma.09G006700.Wm82.a4.v1	(1 of 17) PF14476 - Petal formation-expressed (Chloroplast_duf)	yes|up
Glyma.06G021200.Wm82.a4.v1	(1 of 2) PTHR13871//PTHR13871:SF48 - THIOREDOXIN // SUBFAMILY NOT NAMED	yes|down
Glyma.03G208200.Wm82.a4.v1	(1 of 154) K00430 - peroxidase (E1.11.1.7)	yes|up
Glyma.02G156100.Wm82.a4.v1	(1 of 32) 1.14.13.121 - Premnaspirodiene oxygenase / Hyoscymus muticus premnaspirodiene oxygenase	yes|up
Glyma.02G130400.Wm82.a4.v1	(1 of 20) 2.3.1.74 - Naringenin-chalcone synthase / Flavonone synthase	yes|up
Glyma.17G248600.Wm82.a4.v1	(1 of 11) KOG2966 - Uncharacterized conserved protein	yes|down
Glyma.05G022100.Wm82.a4.v1	(1 of 5) K05280 - flavonoid 3'-monooxygenase (E1.14.13.21)	yes|up
Glyma.06G241300.Wm82.a4.v1	(1 of 8) PTHR24128:SF24 - ANKYRIN REPEAT FAMILY PROTEIN-RELATED	yes|up
Glyma.13G324900.Wm82.a4.v1	(1 of 2) PTHR11132//PTHR11132:SF115 - SOLUTE CARRIER FAMILY 35 // SUBFAMILY NOT NAMED	yes|down
Glyma.13G092500.Wm82.a4.v1	(1 of 2) PTHR10788//PTHR10788:SF30 - TREHALOSE-6-PHOSPHATE SYNTHASE // ALPHA,ALPHA-TREHALOSE-PHOSPHATE SYNTHASE [UDP-FORMING] 11-RELATED	yes|up
Glyma.06G036700.Wm82.a4.v1	(1 of 3) PTHR34052:SF1 - AUXIN RESPONSE FACTOR 30-RELATED	yes|down
Glyma.08G014200.Wm82.a4.v1	(1 of 2) PTHR11588//PTHR11588:SF124 - TUBULIN // SUBFAMILY NOT NAMED	yes|down
Glyma.03G231000.Wm82.a4.v1	(1 of 4) PTHR23244//PTHR23244:SF294 - KELCH REPEAT DOMAIN // SUBFAMILY NOT NAMED	yes|down
Glyma.U031104.Wm82.a4.v1	(1 of 48) 3.2.1.14 - Chitinase / Poly-beta-glucosaminidase	yes|up
Glyma.15G234700.Wm82.a4.v1	(1 of 8) PTHR11926//PTHR11926:SF286 - GLUCOSYL/GLUCURONOSYL TRANSFERASES // SUBFAMILY NOT NAMED	yes|down
Glyma.07G226800.Wm82.a4.v1	(1 of 86) PF13912 - C2H2-type zinc finger (zf-C2H2_6)	yes|down
Glyma.11G135900.Wm82.a4.v1	(1 of 2) PTHR14194//PTHR14194:SF38 - NITROGEN METABOLIC REGULATION PROTEIN NMR-RELATED // PROTEIN PLASTID TRANSCRIPTIONALLY ACTIVE 16	yes|down
Glyma.12G225600.Wm82.a4.v1	(1 of 4) PTHR11206:SF78 - MATE EFFLUX FAMILY PROTEIN ALF5-RELATED	yes|down
Glyma.03G263000.Wm82.a4.v1	(1 of 5) PTHR14155//PTHR14155:SF99 - RING FINGER DOMAIN-CONTAINING // RING-H2 FINGER PROTEIN ATL3	yes|up
Glyma.06G119200.Wm82.a4.v1	(1 of 11) PF00069//PF13947 - Protein kinase domain (Pkinase) // Wall-associated receptor kinase galacturonan-binding (GUB_WAK_bind)	yes|down
Glyma.02G048600.Wm82.a4.v1	(1 of 4) K00475 - naringenin 3-dioxygenase (E1.14.11.9)	yes|down
Glyma.03G038700.Wm82.a4.v1	(1 of 154) K00430 - peroxidase (E1.11.1.7)	yes|up
Glyma.02G047600.Wm82.a4.v1	(1 of 3) 1.18.1.2//1.6.99.1 - Ferredoxin--NADP(+) reductase // NADPH dehydrogenase / NADPH diaphorase	yes|down
Glyma.14G053700.Wm82.a4.v1	(1 of 154) K00430 - peroxidase (E1.11.1.7)	yes|up
Glyma.04G007300.Wm82.a4.v1	(1 of 4) 2.4.2.14 - Amidophosphoribosyltransferase / Phosphoribosyldiphosphate 5-amidotransferase	yes|down
Glyma.09G278100.Wm82.a4.v1		yes|down
Glyma.14G212200.Wm82.a4.v1	(1 of 4) PTHR22849//PTHR22849:SF43 - WDSAM1 PROTEIN // U-BOX DOMAIN-CONTAINING PROTEIN 54-RELATED	yes|up
Glyma.10G203000.Wm82.a4.v1	(1 of 1) PF00005//PF01061//PF08370 - ABC transporter (ABC_tran) // ABC-2 type transporter (ABC2_membrane) // Plant PDR ABC transporter associated (PDR_assoc)	yes|down
Glyma.08G364700.Wm82.a4.v1	(1 of 4) PTHR12161:SF23 - REGULATOR OF VPS4 ACTIVITY IN THE MVB PATHWAY PROTEIN	yes|up
Glyma.08G359300.Wm82.a4.v1	(1 of 6) PTHR11709//PTHR11709:SF70 - MULTI-COPPER OXIDASE // SUBFAMILY NOT NAMED	yes|down
Glyma.08G243300.Wm82.a4.v1	(1 of 87) PF12937 - F-box-like (F-box-like)	yes|down
Glyma.20G220000.Wm82.a4.v1	(1 of 4) PTHR10795//PTHR10795:SF394 - PROPROTEIN CONVERTASE SUBTILISIN/KEXIN // SUBFAMILY NOT NAMED	yes|down
Glyma.19G243100.Wm82.a4.v1	(1 of 30) PF05910 - Plant protein of unknown function (DUF868) (DUF868)	yes|down
Glyma.17G244700.Wm82.a4.v1	(1 of 4) PTHR33348//PTHR33348:SF3 - FAMILY NOT NAMED // C-TERMINALLY ENCODED PEPTIDE 1	yes|down
Glyma.04G043800.Wm82.a4.v1	(1 of 1) PTHR11945//PTHR11945:SF200 - MADS BOX PROTEIN // SUBFAMILY NOT NAMED	yes|up
Glyma.20G077300.Wm82.a4.v1	(1 of 4) PTHR31683:SF20 - PECTATE LYASE 1-RELATED	yes|down
Glyma.14G012100.Wm82.a4.v1	(1 of 2) PTHR11132:SF38 - GB|AAF04433.1	yes|down
Glyma.18G002600.Wm82.a4.v1	(1 of 2) PTHR11062:SF110 - EXOSTOSIN FAMILY PROTEIN	yes|down
Glyma.09G229300.Wm82.a4.v1		yes|up
Glyma.03G144400.Wm82.a4.v1	(1 of 3) PTHR33493//PTHR33493:SF2 - FAMILY NOT NAMED // LATE EMBRYOGENESIS ABUNDANT PROTEIN 4-5	yes|down
Glyma.06G149120.Wm82.a4.v1	(1 of 3) PF08787 - Alginate lyase (Alginate_lyase2)	yes|down
Glyma.13G224400.Wm82.a4.v1	(1 of 4) PTHR11566//PTHR11566:SF45 - DYNAMIN // DYNAMIN-RELATED PROTEIN 4C-RELATED	yes|down
Glyma.06G030300.Wm82.a4.v1		yes|up
Glyma.02G106300.Wm82.a4.v1	(1 of 6) 1.14.19.4 - Delta(8)-fatty-acid desaturase / SLD	yes|down
Glyma.08G321200.Wm82.a4.v1	(1 of 7) PTHR13683:SF246 - ASPARTYL PROTEASE FAMILY PROTEIN	yes|up
Glyma.09G285700.Wm82.a4.v1		yes|down
Glyma.08G200100.Wm82.a4.v1	(1 of 5) PTHR31284//PTHR31284:SF7 - FAMILY NOT NAMED // ACID PHOSPHATASE-RELATED	yes|down
Glyma.05G247800.Wm82.a4.v1	(1 of 5) K14379 - tartrate-resistant acid phosphatase type 5 (ACP5)	yes|down
Glyma.13G282200.Wm82.a4.v1	(1 of 36) PF12609 - Wound-induced protein (DUF3774)	yes|up
Glyma.17G195900.Wm82.a4.v1	(1 of 4) KOG1163 - Casein kinase (serine/threonine/tyrosine protein kinase)	yes|down
Glyma.07G138100.Wm82.a4.v1		yes|up
Glyma.16G180500.Wm82.a4.v1	(1 of 2) PTHR31896//PTHR31896:SF4 - FAMILY NOT NAMED // BAHD ACYLTRANSFERASE DCR	yes|down
Glyma.15G090100.Wm82.a4.v1	(1 of 3) PTHR10209//PTHR10209:SF176 - OXIDOREDUCTASE, 2OG-FE II OXYGENASE FAMILY PROTEIN // SUBFAMILY NOT NAMED	yes|up
Glyma.07G113100.Wm82.a4.v1	(1 of 17) KOG2722 - Predicted membrane protein	yes|down
Glyma.17G061100.Wm82.a4.v1	(1 of 24) PTHR31642//PTHR31642:SF57 - FAMILY NOT NAMED // SPERMIDINE HYDROXYCINNAMOYL TRANSFERASE	yes|down
Glyma.19G016100.Wm82.a4.v1	(1 of 2) PTHR13778//PTHR13778:SF7 - GLYCOSYLTRANSFERASE 8 DOMAIN-CONTAINING PROTEIN // GALACTURONOSYLTRANSFERASE-LIKE 8-RELATED	yes|up
Glyma.04G021600.Wm82.a4.v1	(1 of 5) PTHR31867//PTHR31867:SF4 - FAMILY NOT NAMED // EXPANSIN-A11	yes|down
Glyma.20G142700.Wm82.a4.v1		yes|down
Glyma.14G089024.Wm82.a4.v1	(1 of 4) PTHR24206:SF35 - TRANSCRIPTION FACTOR-RELATED	yes|down
Glyma.16G172400.Wm82.a4.v1	(1 of 5) K05666 - ATP-binding cassette, subfamily C (CFTR/MRP), member 2 (ABCC2)	yes|down
Glyma.10G243800.Wm82.a4.v1	(1 of 2) PTHR14154//PTHR14154:SF5 - UPF0041 BRAIN PROTEIN 44-RELATED // EARLY LIGHT-INDUCED PROTEIN 1, CHLOROPLASTIC-RELATED	yes|down
Glyma.06G319000.Wm82.a4.v1	(1 of 1) PTHR31707:SF60 - PECTINESTERASE INHIBITOR 1-RELATED	yes|down
Glyma.12G202500.Wm82.a4.v1	(1 of 2) K08902 - photosystem II Psb27 protein (psb27)	yes|down
Glyma.19G237800.Wm82.a4.v1	(1 of 2) PTHR11130//PTHR11130:SF2 - GLUTATHIONE SYNTHETASE // SUBFAMILY NOT NAMED	yes|down
Glyma.10G177200.Wm82.a4.v1	(1 of 4) K08916 - light-harvesting complex II chlorophyll a/b binding protein 5 (LHCB5)	yes|down
Glyma.04G208450.Wm82.a4.v1	(1 of 1) PTHR23421//PTHR23421:SF67//PTHR23421:SF73 - BETA-GALACTOSIDASE RELATED // BETA-GALACTOSIDASE 10 // BETA-GALACTOSIDASE 6	yes|down
Glyma.20G220900.Wm82.a4.v1	(1 of 21) PTHR31238//PTHR31238:SF42 - FAMILY NOT NAMED // GERMIN-LIKE PROTEIN SUBFAMILY 1 MEMBER 10-RELATED	yes|down
Glyma.19G106800.Wm82.a4.v1	(1 of 4) 1.2.1.12//1.2.1.13 - Glyceraldehyde-3-phosphate dehydrogenase (phosphorylating) / Triosephosphate dehydrogenase // Glyceraldehyde-3-phosphate dehydrogenase (NADP(+)) (phosphorylating) / Triosephosphate dehydrogenase (NADP+)	yes|down
Glyma.03G180000.Wm82.a4.v1	(1 of 36) PTHR32077//PTHR32077:SF7 - FAMILY NOT NAMED // FASCICLIN-LIKE ARABINOGALACTAN PROTEIN 11	yes|down
Glyma.02G031000.Wm82.a4.v1	(1 of 4) PTHR11119//PTHR11119:SF50 - XANTHINE-URACIL / VITAMIN C PERMEASE FAMILY MEMBER // NUCLEOBASE-ASCORBATE TRANSPORTER 7-RELATED	yes|down
Glyma.18G186400.Wm82.a4.v1	(1 of 16) K08081 - Tropinone reductase 1 (TR1)	yes|down
Glyma.13G077500.Wm82.a4.v1	(1 of 3) PTHR26402//PTHR26402:SF498 - RESPONSE REGULATOR OF TWO-COMPONENT SYSTEM // SUBFAMILY NOT NAMED	yes|down
Glyma.02G016400.Wm82.a4.v1	(1 of 5) PTHR22298:SF55 - ENDOGLUCANASE 1-RELATED	yes|down
Glyma.08G006333.Wm82.a4.v1	(1 of 3) PTHR11895:SF73 - AMIDASE FAMILY PROTEIN	yes|up
Glyma.05G051500.Wm82.a4.v1	(1 of 5) PTHR10795//PTHR10795:SF369 - PROPROTEIN CONVERTASE SUBTILISIN/KEXIN // SUBFAMILY NOT NAMED	yes|down
Glyma.09G062500.Wm82.a4.v1	(1 of 2227) 2.7.11.1 - Non-specific serine/threonine protein kinase / Threonine-specific protein kinase	yes|down
Glyma.20G129200.Wm82.a4.v1	(1 of 3) PTHR27008:SF42 - LEUCINE-RICH REPEAT PROTEIN KINASE-LIKE PROTEIN	yes|down
Glyma.07G135800.Wm82.a4.v1		yes|down
Glyma.10G176500.Wm82.a4.v1	(1 of 13) 2.1.1.150 - Isoflavone 7-O-methyltransferase	yes|up
Glyma.09G080100.Wm82.a4.v1	(1 of 7) 3.5.4.3 - Guanine deaminase / Guanine aminase	yes|up
Glyma.18G289800.Wm82.a4.v1	(1 of 82) PF04535 - Domain of unknown function (DUF588) (DUF588)	yes|down
Glyma.04G102800.Wm82.a4.v1	(1 of 7) PTHR23500//PTHR23500:SF44 - FAMILY NOT NAMED // SUGAR TRANSPORT PROTEIN 5	yes|down
Glyma.03G123100.Wm82.a4.v1	(1 of 2) PTHR31407:SF14 - PSBP DOMAIN-CONTAINING PROTEIN 6, CHLOROPLASTIC	yes|down
Glyma.03G181300.Wm82.a4.v1	(1 of 4) PTHR31223//PTHR31223:SF17 - FAMILY NOT NAMED // CYTOKININ RIBOSIDE 5'-MONOPHOSPHATE PHOSPHORIBOHYDROLASE LOG3-RELATED	yes|down
Glyma.02G209500.Wm82.a4.v1	(1 of 85) PF02298 - Plastocyanin-like domain (Cu_bind_like)	yes|down
Glyma.05G065800.Wm82.a4.v1	(1 of 12) PTHR31692:SF10 - EXPANSIN-LIKE B1	yes|down
Glyma.07G212800.Wm82.a4.v1	(1 of 2) 1.7.7.1 - Ferredoxin--nitrite reductase	yes|down
Glyma.16G044900.Wm82.a4.v1	(1 of 4) 1.2.1.12//1.2.1.13 - Glyceraldehyde-3-phosphate dehydrogenase (phosphorylating) / Triosephosphate dehydrogenase // Glyceraldehyde-3-phosphate dehydrogenase (NADP(+)) (phosphorylating) / Triosephosphate dehydrogenase (NADP+)	yes|down
Glyma.07G209900.Wm82.a4.v1	(1 of 4) PTHR31388//PTHR31388:SF35 - FAMILY NOT NAMED // PEROXIDASE 10	yes|up
Glyma.10G251700.Wm82.a4.v1	(1 of 10) PTHR31062:SF1 - XYLOGLUCAN ENDOTRANSGLUCOSYLASE/HYDROLASE PROTEIN 8-RELATED	yes|down
Glyma.06G084200.Wm82.a4.v1	(1 of 1) PTHR21234//PTHR21234:SF28 - PURINE NUCLEOSIDE PHOSPHORYLASE // SUBFAMILY NOT NAMED	yes|down
Glyma.02G015800.Wm82.a4.v1	(1 of 3) K01679 - fumarate hydratase, class II (E4.2.1.2B, fumC)	yes|down
Glyma.03G170400.Wm82.a4.v1	(1 of 49) PF12796//PF13962 - Ankyrin repeats (3 copies) (Ank_2) // Domain of unknown function (PGG)	yes|down
Glyma.15G161200.Wm82.a4.v1	(1 of 2227) 2.7.11.1 - Non-specific serine/threonine protein kinase / Threonine-specific protein kinase	yes|down
Glyma.11G060500.Wm82.a4.v1		yes|up
Glyma.18G065100.Wm82.a4.v1	(1 of 9) PTHR11709:SF103 - LACCASE-16	yes|down
Glyma.19G244600.Wm82.a4.v1	(1 of 5) 5.1.3.18 - GDP-mannose 3,5-epimerase	yes|down
Glyma.20G243500.Wm82.a4.v1	(1 of 2) 2.2.1.1//2.2.1.2 - Transketolase / Glycoaldehyde transferase // Transaldolase / Glycerone transferase	yes|down
Glyma.16G060800.Wm82.a4.v1	(1 of 21) PTHR31238//PTHR31238:SF42 - FAMILY NOT NAMED // GERMIN-LIKE PROTEIN SUBFAMILY 1 MEMBER 10-RELATED	yes|up
Glyma.13G122800.Wm82.a4.v1	(1 of 16) K14516 - ethylene-responsive transcription factor 1 (ERF1)	yes|up
Glyma.08G006100.Wm82.a4.v1		yes|up
Glyma.19G134800.Wm82.a4.v1	(1 of 5) PTHR32227:SF49 - BETA-1,3-GLUCANASE 1-RELATED	yes|down
Glyma.05G180700.Wm82.a4.v1	(1 of 5) PTHR10551//PTHR10551:SF13 - FASCIN // SUBFAMILY NOT NAMED	yes|down
Glyma.18G147700.Wm82.a4.v1	(1 of 4) PTHR11119:SF54 - NUCLEOBASE-ASCORBATE TRANSPORTER 11	yes|down
Glyma.06G269300.Wm82.a4.v1	(1 of 1) 2.7.1.24//3.6.3.44 - Dephospho-CoA kinase / Dephosphocoenzyme A kinase // Xenobiotic-transporting ATPase / Steroid-transporting ATPase	yes|down
Glyma.15G159800.Wm82.a4.v1		yes|up
Glyma.08G200200.Wm82.a4.v1	(1 of 56) 3.1.3.2 - Acid phosphatase / Phosphomonoesterase	yes|down
Glyma.03G109100.Wm82.a4.v1	(1 of 176) PF03106 - WRKY DNA -binding domain (WRKY)	yes|down
Glyma.19G030700.Wm82.a4.v1	(1 of 14) 2.3.1.115 - Isoflavone-7-O-beta-glucoside 6''-O-malonyltransferase / Flavone/flavonol 7-O-beta-D-glucoside malonyltransferase	yes|down
Glyma.18G137500.Wm82.a4.v1	(1 of 2) PTHR31062:SF25 - XYLOGLUCAN ENDOTRANSGLUCOSYLASE/HYDROLASE PROTEIN 33-RELATED	yes|down
Glyma.03G058500.Wm82.a4.v1	(1 of 5) PTHR31503:SF1 - VACUOLAR CATION/PROTON EXCHANGER 1-RELATED	yes|down
Glyma.15G085300.Wm82.a4.v1	(1 of 131) PF00892 - EamA-like transporter family (EamA)	yes|down
Glyma.01G050100.Wm82.a4.v1	(1 of 74) PF01357//PF03330 - Pollen allergen (Pollen_allerg_1) // Rare lipoprotein A (RlpA)-like double-psi beta-barrel (DPBB_1)	yes|down
Glyma.09G036500.Wm82.a4.v1	(1 of 111) PF03514 - GRAS domain family (GRAS)	yes|up
Glyma.03G049800.Wm82.a4.v1	(1 of 4) PTHR32285:SF11 - PROTEIN TRICHOME BIREFRINGENCE-LIKE 34	yes|down
Glyma.15G268200.Wm82.a4.v1		yes|up
Glyma.17G238400.Wm82.a4.v1	(1 of 4) PTHR10177//PTHR10177:SF242 - CYCLINE // SUBFAMILY NOT NAMED	yes|down
Glyma.10G139800.Wm82.a4.v1	(1 of 8) PTHR31238//PTHR31238:SF39 - FAMILY NOT NAMED // GERMIN-LIKE PROTEIN SUBFAMILY 2 MEMBER 1-RELATED	yes|down
Glyma.11G063100.Wm82.a4.v1	(1 of 2227) 2.7.11.1 - Non-specific serine/threonine protein kinase / Threonine-specific protein kinase	yes|up
Glyma.07G048800.Wm82.a4.v1	(1 of 4) PTHR11746//PTHR11746:SF103 - O-METHYLTRANSFERASE // SUBFAMILY NOT NAMED	yes|up
Glyma.02G298100.Wm82.a4.v1	(1 of 5) PTHR22814:SF34 - COPPER TRANSPORT PROTEIN-RELATED	yes|up
Glyma.17G075300.Wm82.a4.v1	(1 of 3) K00131 - glyceraldehyde-3-phosphate dehydrogenase (NADP+) (gapN)	yes|down
Glyma.01G055700.Wm82.a4.v1	(1 of 4) PTHR11453//PTHR11453:SF48 - ANION EXCHANGE PROTEIN // BORON TRANSPORTER 4-RELATED	yes|up
Glyma.18G287000.Wm82.a4.v1	(1 of 18) PTHR23155//PTHR23155:SF402 - LEUCINE-RICH REPEAT-CONTAINING PROTEIN // DISEASE RESISTANCE PROTEIN RPP13-RELATED	yes|up
Glyma.03G006800.Wm82.a4.v1	(1 of 2) PTHR11062//PTHR11062:SF91 - EXOSTOSIN HEPARAN SULFATE GLYCOSYLTRANSFERASE -RELATED // SUBFAMILY NOT NAMED	yes|up
Glyma.01G129100.Wm82.a4.v1	(1 of 12) PTHR31087:SF11 - PROTEIN LURP-ONE-RELATED 1-RELATED	yes|up
Glyma.07G013900.Wm82.a4.v1	(1 of 5) 1.13.99.1 - Inositol oxygenase / Myo-inositol oxygenase	yes|down
Glyma.14G044400.Wm82.a4.v1	(1 of 120) PF00560//PF08263//PF13855 - Leucine Rich Repeat (LRR_1) // Leucine rich repeat N-terminal domain (LRRNT_2) // Leucine rich repeat (LRR_8)	yes|up
Glyma.19G222900.Wm82.a4.v1	(1 of 4) PTHR31867:SF34 - EXPANSIN-A17-RELATED	yes|up
Glyma.18G249700.Wm82.a4.v1	(1 of 14) PF00069//PF00560//PF07714//PF08263//PF13855 - Protein kinase domain (Pkinase) // Leucine Rich Repeat (LRR_1) // Protein tyrosine kinase (Pkinase_Tyr) // Leucine rich repeat N-terminal domain (LRRNT_2) // Leucine rich repeat (LRR_8)	yes|up
Glyma.12G062700.Wm82.a4.v1	(1 of 3) PTHR31867:SF29 - EXPANSIN-A3	yes|down
Glyma.13G242100.Wm82.a4.v1	(1 of 12) PTHR11772//PTHR11772:SF14 - ASPARAGINE SYNTHETASE // SUBFAMILY NOT NAMED	yes|up
Glyma.19G234500.Wm82.a4.v1	(1 of 7) PTHR10593//PTHR10593:SF31 - SERINE/THREONINE-PROTEIN KINASE RIO // C2H2-LIKE ZINC FINGER PROTEIN-RELATED	yes|down
Glyma.13G161900.Wm82.a4.v1	(1 of 2) PTHR22953:SF13 - BIFUNCTIONAL PURPLE ACID PHOSPHATASE 26	yes|down
Glyma.01G095500.Wm82.a4.v1	(1 of 2) PTHR11969:SF22 - TRANSCRIPTION FACTOR BHLH71-RELATED	yes|up
Glyma.10G256200.Wm82.a4.v1	(1 of 2) PTHR10177//PTHR10177:SF224 - CYCLINE // SUBFAMILY NOT NAMED	yes|down
Glyma.15G252200.Wm82.a4.v1	(1 of 4) PTHR11260//PTHR11260:SF195 - GLUTATHIONE S-TRANSFERASE, GST, SUPERFAMILY, GST DOMAIN CONTAINING // SUBFAMILY NOT NAMED	yes|down
Glyma.13G290600.Wm82.a4.v1	(1 of 4) PTHR31165//PTHR31165:SF10 - FAMILY NOT NAMED // PROTEIN LIGHT-DEPENDENT SHORT HYPOCOTYLS 10-RELATED	yes|down
Glyma.03G181700.Wm82.a4.v1	(1 of 8) 4.3.1.24 - Phenylalanine ammonia-lyase	yes|up
Glyma.14G188950.Wm82.a4.v1	(1 of 3) PTHR11361:SF81 - DNA MISMATCH REPAIR PROTEIN MUTS, TYPE 2	yes|down
Glyma.03G111700.Wm82.a4.v1	(1 of 14) PTHR31190//PTHR31190:SF21 - FAMILY NOT NAMED // ETHYLENE-RESPONSIVE TRANSCRIPTION FACTOR 13	yes|up
Glyma.10G156500.Wm82.a4.v1	(1 of 17) K10664 - E3 ubiquitin-protein ligase ATL6/9/15/31/42/55 [EC:6.3.2.19] (ATL6S)	yes|up
Glyma.08G260500.Wm82.a4.v1	(1 of 4) PTHR12161:SF23 - REGULATOR OF VPS4 ACTIVITY IN THE MVB PATHWAY PROTEIN	yes|up
Glyma.15G038700.Wm82.a4.v1	(1 of 9) PTHR11937//PTHR11937:SF255 - ACTIN // SUBFAMILY NOT NAMED	yes|down
Glyma.08G142400.Wm82.a4.v1	(1 of 2) PTHR31221//PTHR31221:SF36 - FAMILY NOT NAMED // WRKY TRANSCRIPTION FACTOR 50-RELATED	yes|up
Glyma.03G215900.Wm82.a4.v1	(1 of 4) PTHR31707//PTHR31707:SF33 - FAMILY NOT NAMED // INVERTASE/PECTIN METHYLESTERASE INHIBITOR FAMILY PROTEIN	yes|up
Glyma.08G352100.Wm82.a4.v1	(1 of 9) PTHR27002:SF84 - ATP BINDING / PROTEIN KINASE-RELATED	yes|up
Glyma.03G116300.Wm82.a4.v1	(1 of 24) KOG1987 - Speckle-type POZ protein SPOP and related proteins with TRAF, MATH and BTB/POZ domains	yes|up
Glyma.20G074400.Wm82.a4.v1	(1 of 6) 4.2.3.27 - Isoprene synthase / ISPS	yes|up
Glyma.14G093100.Wm82.a4.v1	(1 of 5) PF01439 - Metallothionein (Metallothio_2)	yes|up
Glyma.U004601.Wm82.a4.v1	(1 of 224) KOG0472 - Leucine-rich repeat protein	yes|up
Glyma.19G255300.Wm82.a4.v1	(1 of 8) PTHR10217//PTHR10217:SF465 - VOLTAGE AND LIGAND GATED POTASSIUM CHANNEL // CYCLIC NUCLEOTIDE-GATED ION CHANNEL 11-RELATED	yes|up
Glyma.19G182400.Wm82.a4.v1	(1 of 4) K00856 - adenosine kinase (E2.7.1.20, ADK)	yes|down
Glyma.15G131200.Wm82.a4.v1	(1 of 2) 1.1.1.31 - 3-hydroxyisobutyrate dehydrogenase	yes|down
Glyma.18G150600.Wm82.a4.v1	(1 of 9) K18195 - rhamnogalacturonan endolyase (RGL4, rhiE)	yes|down
Glyma.10G079700.Wm82.a4.v1	(1 of 16) PTHR31415:SF4 - HARPIN-INDUCED PROTEIN-LIKE-RELATED	yes|up
Glyma.01G004000.Wm82.a4.v1	(1 of 2) PTHR11716//PTHR11716:SF47 - PHOSPHOLIPASE A2 // PROTEIN C07E3.9	yes|up
Glyma.17G006600.Wm82.a4.v1	(1 of 4) PTHR31246:SF5 - MICROTUBULE-ASSOCIATED PROTEIN 70-5	yes|down
Glyma.13G155800.Wm82.a4.v1	(1 of 4) PTHR11177//PTHR11177:SF208 - CHITINASE // SUBFAMILY NOT NAMED	yes|up
Glyma.01G175800.Wm82.a4.v1		yes|up
Glyma.08G335200.Wm82.a4.v1	(1 of 5) K12349 - neutral ceramidase (ASAH2)	yes|down
Glyma.19G133702.Wm82.a4.v1		yes|down
Glyma.18G255500.Wm82.a4.v1		yes|up
Glyma.05G236300.Wm82.a4.v1	(1 of 37) PF04749 - PLAC8 family (PLAC8)	yes|up
Glyma.20G213700.Wm82.a4.v1	(1 of 13) 2.1.1.150 - Isoflavone 7-O-methyltransferase	yes|up
Glyma.02G263300.Wm82.a4.v1	(1 of 37) PF04749 - PLAC8 family (PLAC8)	yes|down
Glyma.U031124.Wm82.a4.v1	(1 of 1) PTHR31087:SF17 - PROTEIN LURP-ONE-RELATED 14-RELATED	yes|up
Glyma.15G016800.Wm82.a4.v1	(1 of 2) PTHR15907:SF46 - PROTEIN PLANT CADMIUM RESISTANCE 8	yes|up
Glyma.19G216700.Wm82.a4.v1	(1 of 111) PF03514 - GRAS domain family (GRAS)	yes|up
Glyma.08G360400.Wm82.a4.v1	(1 of 2) PF03083//PF04193 - Sugar efflux transporter for intercellular exchange (MtN3_slv) // PQ loop repeat (PQ-loop)	yes|down
Glyma.15G172800.Wm82.a4.v1	(1 of 4) PTHR10052//PTHR10052:SF11 - 60S RIBOSOMAL PROTEIN L18A // SUBFAMILY NOT NAMED	yes|up
Glyma.15G007801.Wm82.a4.v1	(1 of 6) PTHR27002//PTHR27002:SF31 - FAMILY NOT NAMED // G-TYPE LECTIN S-RECEPTOR-LIKE SERINE/THREONINE-PROTEIN KINASE SD2-5	yes|down
Glyma.15G194200.Wm82.a4.v1	(1 of 5) PTHR31422//PTHR31422:SF1 - FAMILY NOT NAMED // EXPRESSED PROTEIN	yes|down
Glyma.12G172700.Wm82.a4.v1	(1 of 63) K04733 - interleukin-1 receptor-associated kinase 4 (IRAK4)	yes|down
Glyma.08G193500.Wm82.a4.v1	(1 of 8) PTHR23421//PTHR23421:SF74 - BETA-GALACTOSIDASE RELATED // BETA-GALACTOSIDASE 1	yes|down
Glyma.07G219000.Wm82.a4.v1	(1 of 2) PTHR10772//PTHR10772:SF9 - 10 KDA HEAT SHOCK PROTEIN // GROES-LIKE PROTEIN	yes|down
Glyma.07G126000.Wm82.a4.v1	(1 of 4) PTHR27000//PTHR27000:SF4 - FAMILY NOT NAMED // EXTENSIN-LIKE PROTEIN-RELATED	yes|down
Glyma.08G138901.Wm82.a4.v1	(1 of 1) PTHR11709//PTHR11709:SF28 - MULTI-COPPER OXIDASE // SUBFAMILY NOT NAMED	yes|up
Glyma.12G037400.Wm82.a4.v1	(1 of 4) PTHR11627:SF16 - FRUCTOSE-BISPHOSPHATE ALDOLASE 1, CHLOROPLASTIC-RELATED	yes|down
Glyma.08G134200.Wm82.a4.v1		yes|up
Glyma.15G276100.Wm82.a4.v1	(1 of 5) PTHR31265:SF2 - F17A17.37 PROTEIN	yes|down
Glyma.03G040900.Wm82.a4.v1	(1 of 12) PTHR31087:SF11 - PROTEIN LURP-ONE-RELATED 1-RELATED	yes|up
Glyma.08G019000.Wm82.a4.v1	(1 of 106) PF03168 - Late embryogenesis abundant protein (LEA_2)	yes|up
Glyma.11G205400.Wm82.a4.v1	(1 of 32) PF00069//PF01657 - Protein kinase domain (Pkinase) // Salt stress response/antifungal (Stress-antifung)	yes|up
Glyma.12G121700.Wm82.a4.v1	(1 of 9) PTHR11709:SF103 - LACCASE-16	yes|down
Glyma.14G086300.Wm82.a4.v1	(1 of 5) 3.5.1.1 - Asparaginase / L-asparagine amidohydrolase	yes|down
Glyma.10G046000.Wm82.a4.v1	(1 of 4) PTHR12542//PTHR12542:SF38 - EXOCYST COMPLEX PROTEIN EXO70 // EXOCYST SUBUNIT EXO70 FAMILY PROTEIN-RELATED	yes|up
Glyma.16G026400.Wm82.a4.v1	(1 of 176) PF03106 - WRKY DNA -binding domain (WRKY)	yes|up
Glyma.08G141000.Wm82.a4.v1	(1 of 2) PTHR11064//PTHR11064:SF48 - CCAAT-BINDING TRANSCRIPTION FACTOR-RELATED // SUBFAMILY NOT NAMED	yes|up
Glyma.02G092500.Wm82.a4.v1	(1 of 82) PF04535 - Domain of unknown function (DUF588) (DUF588)	yes|up
Glyma.12G051800.Wm82.a4.v1	(1 of 4) PTHR10584:SF168 - F14I3.3 PROTEIN-RELATED	yes|down
Glyma.11G230300.Wm82.a4.v1	(1 of 11) PTHR27003//PTHR27003:SF102 - FAMILY NOT NAMED // SERINE/THREONINE-PROTEIN KINASE-LIKE PROTEIN CCR3-RELATED	yes|up
Glyma.03G179900.Wm82.a4.v1	(1 of 36) PTHR32077//PTHR32077:SF7 - FAMILY NOT NAMED // FASCICLIN-LIKE ARABINOGALACTAN PROTEIN 11	yes|down
Glyma.08G085600.Wm82.a4.v1		yes|up
Glyma.20G137802.Wm82.a4.v1	(1 of 7) PTHR32099//PTHR32099:SF1 - CYSTEINE-RICH REPEAT SECRETORY PROTEIN // CYSTEINE-RICH RECEPTOR-LIKE PROTEIN KINASE 9-RELATED	yes|up
Glyma.18G025600.Wm82.a4.v1	(1 of 4) PTHR31301//PTHR31301:SF24 - FAMILY NOT NAMED // LOB DOMAIN-CONTAINING PROTEIN 21	yes|down
Glyma.16G072600.Wm82.a4.v1		yes|down
Glyma.07G212400.Wm82.a4.v1	(1 of 349) PF00847 - AP2 domain (AP2)	yes|up
Glyma.03G002700.Wm82.a4.v1	(1 of 25) PF00069//PF00954//PF01453 - Protein kinase domain (Pkinase) // S-locus glycoprotein domain (S_locus_glycop) // D-mannose binding lectin (B_lectin)	yes|up
Glyma.01G203500.Wm82.a4.v1	(1 of 4) PTHR27001//PTHR27001:SF75 - FAMILY NOT NAMED // PROTEIN KINASE FAMILY PROTEIN	yes|up
Glyma.10G213100.Wm82.a4.v1	(1 of 8) PTHR32295//PTHR32295:SF32 - FAMILY NOT NAMED // PROTEIN IQ-DOMAIN 3-RELATED	yes|up
Glyma.11G042900.Wm82.a4.v1	(1 of 4) PTHR31500//PTHR31500:SF17 - FAMILY NOT NAMED // AT HOOK MOTIF DNA-BINDING FAMILY PROTEIN	yes|down
Glyma.13G033800.Wm82.a4.v1	(1 of 73) 3.1.4.46 - Glycerophosphodiester phosphodiesterase / Glycerophosphoryl diester phosphodiesterase	yes|up
Glyma.08G338200.Wm82.a4.v1	(1 of 7) PTHR11926//PTHR11926:SF189 - GLUCOSYL/GLUCURONOSYL TRANSFERASES // UDP-GLYCOSYLTRANSFERASE 72B2-RELATED	yes|up
Glyma.05G159200.Wm82.a4.v1	(1 of 4) PTHR27000:SF154 - LEUCINE-RICH REPEAT RECEPTOR-LIKE PROTEIN KINASE	yes|up
Glyma.13G232400.Wm82.a4.v1	(1 of 1) PTHR31147:SF10 - N-HYDROXYCINNAMOYL/BENZOYLTRANSFERASE, PUTATIVE-RELATED	yes|up
Glyma.12G186200.Wm82.a4.v1	(1 of 4) PTHR31989//PTHR31989:SF4 - FAMILY NOT NAMED // NAC DOMAIN-CONTAINING PROTEIN 61-RELATED	yes|up
Glyma.17G169200.Wm82.a4.v1	(1 of 4) PTHR31444//PTHR31444:SF8 - FAMILY NOT NAMED // PROTEIN IRREGULAR XYLEM 15-RELATED	yes|down
Glyma.15G093100.Wm82.a4.v1	(1 of 7) PTHR33077:SF17 - PROTEIN TIFY 5A-RELATED	yes|up
Glyma.09G041900.Wm82.a4.v1		yes|up
Glyma.13G087400.Wm82.a4.v1	(1 of 4) PTHR10551//PTHR10551:SF12 - FASCIN // SUBFAMILY NOT NAMED	yes|down
Glyma.11G220300.Wm82.a4.v1	(1 of 3) PTHR13683//PTHR13683:SF347 - ASPARTYL PROTEASES // CYSTEINE-RICH PEPTIDE FAMILY PROTEIN	yes|down
Glyma.U031424.Wm82.a4.v1	(1 of 27) PTHR27002//PTHR27002:SF9 - FAMILY NOT NAMED // CYSTEINE-RICH RECEPTOR-LIKE PROTEIN KINASE 27-RELATED	yes|up
Glyma.07G039700.Wm82.a4.v1	(1 of 63) K04733 - interleukin-1 receptor-associated kinase 4 (IRAK4)	yes|up
Glyma.04G245000.Wm82.a4.v1	(1 of 3) PTHR10891//PTHR10891:SF530 - EF-HAND CALCIUM-BINDING DOMAIN CONTAINING PROTEIN // SUBFAMILY NOT NAMED	yes|up
Glyma.19G062800.Wm82.a4.v1	(1 of 9) PTHR10209//PTHR10209:SF182 - OXIDOREDUCTASE, 2OG-FE II OXYGENASE FAMILY PROTEIN // SUBFAMILY NOT NAMED	yes|up
Glyma.15G170500.Wm82.a4.v1	(1 of 4) PTHR12565//PTHR12565:SF180 - STEROL REGULATORY ELEMENT-BINDING PROTEIN // SUBFAMILY NOT NAMED	yes|up
Glyma.13G269100.Wm82.a4.v1		yes|down
Glyma.02G040700.Wm82.a4.v1	(1 of 6) K15104 - solute carrier family 25 (mitochondrial oxoglutarate transporter), member 11 (SLC25A11, OGC)	yes|up
Glyma.13G133000.Wm82.a4.v1	(1 of 12) PTHR26374//PTHR26374:SF198 - FAMILY NOT NAMED // ZINC FINGER PROTEIN ZAT11	yes|up
Glyma.04G194800.Wm82.a4.v1	(1 of 6) PTHR10891//PTHR10891:SF621 - EF-HAND CALCIUM-BINDING DOMAIN CONTAINING PROTEIN // SUBFAMILY NOT NAMED	yes|up
Glyma.06G233600.Wm82.a4.v1	(1 of 4) PTHR18966//PTHR18966:SF209 - IONOTROPIC GLUTAMATE RECEPTOR // SUBFAMILY NOT NAMED	yes|up
Glyma.19G096200.Wm82.a4.v1	(1 of 2) PTHR31614:SF3 - POLLEN OLE E 1 ALLERGEN AND EXTENSIN FAMILY PROTEIN	yes|down
Glyma.10G166100.Wm82.a4.v1	(1 of 25) PF04852 - Protein of unknown function (DUF640) (DUF640)	yes|down
Glyma.12G056300.Wm82.a4.v1	(1 of 1) PTHR32467:SF12 - AP2-LIKE ETHYLENE-RESPONSIVE TRANSCRIPTION FACTOR PLT2	yes|down
Glyma.15G259400.Wm82.a4.v1	(1 of 2) PTHR10641:SF462 - F3O9.29 PROTEIN-RELATED	yes|up
Glyma.20G137900.Wm82.a4.v1	(1 of 29) PTHR27002//PTHR27002:SF122 - FAMILY NOT NAMED // CYSTEINE-RICH RECEPTOR-LIKE PROTEIN KINASE 28-RELATED	yes|up
Glyma.06G203100.Wm82.a4.v1		yes|up
Glyma.14G042800.Wm82.a4.v1	(1 of 4) PTHR11695//PTHR11695:SF490 - ALCOHOL DEHYDROGENASE RELATED // SUBFAMILY NOT NAMED	yes|up
Glyma.13G314100.Wm82.a4.v1	(1 of 4) PTHR10797:SF3 - CCR4-ASSOCIATED FACTOR 1 HOMOLOG 11-RELATED	yes|up
Glyma.12G091200.Wm82.a4.v1	(1 of 4) PTHR31989//PTHR31989:SF4 - FAMILY NOT NAMED // NAC DOMAIN-CONTAINING PROTEIN 61-RELATED	yes|up
Glyma.10G203700.Wm82.a4.v1	(1 of 5) KOG2816 - Predicted transporter ADD1 (major facilitator superfamily)	yes|up
Glyma.10G265100.Wm82.a4.v1		yes|up
Glyma.15G123800.Wm82.a4.v1	(1 of 2) PTHR13683//PTHR13683:SF267 - ASPARTYL PROTEASES // ASPARTYL PROTEASE FAMILY PROTEIN-RELATED	yes|up
Glyma.17G117400.Wm82.a4.v1		yes|down
Glyma.12G104600.Wm82.a4.v1	(1 of 10) PTHR10641//PTHR10641:SF584 - MYB-LIKE DNA-BINDING PROTEIN MYB // SUBFAMILY NOT NAMED	yes|up
Glyma.08G100400.Wm82.a4.v1	(1 of 30) 3.1.1.32 - Phospholipase A(1) / Phospholipase A1	yes|up
Glyma.11G196300.Wm82.a4.v1	(1 of 4) PTHR11850//PTHR11850:SF125 - HOMEOBOX PROTEIN TRANSCRIPTION FACTORS // SUBFAMILY NOT NAMED	yes|down
Glyma.09G249200.Wm82.a4.v1	(1 of 2) PTHR10438//PTHR10438:SF258 - THIOREDOXIN // THIOREDOXIN F1, CHLOROPLASTIC-RELATED	yes|down
Glyma.04G029900.Wm82.a4.v1	(1 of 8) PTHR23324//PTHR23324:SF43 - SEC14 RELATED PROTEIN // PHOSPHATIDYLINOSITOL/PHOSPHATIDYLCHOLINE TRANSFER PROTEIN SFH6-RELATED	yes|up
Glyma.04G191100.Wm82.a4.v1	(1 of 4) PTHR31683//PTHR31683:SF28 - FAMILY NOT NAMED // PECTATE LYASE 22-RELATED	yes|down
Glyma.20G098700.Wm82.a4.v1	(1 of 273) PF00646 - F-box domain (F-box)	yes|up
Glyma.19G092000.Wm82.a4.v1	(1 of 3) PTHR23086:SF39 - PHOSPHATIDYLINOSITOL 4-PHOSPHATE 5-KINASE 3	yes|down
Glyma.15G003300.Wm82.a4.v1	(1 of 8) PTHR31429:SF3 - WRKY TRANSCRIPTION FACTOR 40-RELATED	yes|up
Glyma.11G062500.Wm82.a4.v1	(1 of 32) 1.14.13.121 - Premnaspirodiene oxygenase / Hyoscymus muticus premnaspirodiene oxygenase	yes|down
Glyma.01G148800.Wm82.a4.v1	(1 of 3) PF11947 - Protein of unknown function (DUF3464) (DUF3464)	yes|down
Glyma.02G043500.Wm82.a4.v1	(1 of 1) PTHR13710//PTHR13710:SF86 - DNA HELICASE RECQ FAMILY MEMBER // SUBFAMILY NOT NAMED	yes|up
Glyma.13G219300.Wm82.a4.v1		yes|down
Glyma.11G117200.Wm82.a4.v1	(1 of 20) PTHR24078:SF177 - PROTEIN DNJ-23-RELATED	yes|down
Glyma.03G254300.Wm82.a4.v1	(1 of 3) PTHR11177//PTHR11177:SF170 - CHITINASE // SUBFAMILY NOT NAMED	yes|up
Glyma.12G020400.Wm82.a4.v1	(1 of 9) PTHR19241//PTHR19241:SF247 - ATP-BINDING CASSETTE TRANSPORTER // SUBFAMILY NOT NAMED	yes|down
Glyma.07G199800.Wm82.a4.v1	(1 of 2) PTHR33199//PTHR33199:SF8 - FAMILY NOT NAMED // MACPF DOMAIN-CONTAINING PROTEIN NSL1	yes|up
Glyma.11G148989.Wm82.a4.v1		yes|up
Glyma.02G237633.Wm82.a4.v1	(1 of 7) PTHR11562:SF45 - METAL TOLERANCE PROTEIN C3-RELATED	yes|up
Glyma.03G138400.Wm82.a4.v1	(1 of 5) PTHR27002//PTHR27002:SF42 - FAMILY NOT NAMED // G-TYPE LECTIN S-RECEPTOR-LIKE SERINE/THREONINE-PROTEIN KINASE SD3-1	yes|down
Glyma.02G201600.Wm82.a4.v1	(1 of 2) PTHR15852:SF8 - CHAPERONE PROTEIN DNAJ-LIKE PROTEIN	yes|down
Glyma.10G169300.Wm82.a4.v1	(1 of 1) PF12937//PF14299 - F-box-like (F-box-like) // Phloem protein 2 (PP2)	yes|up
Glyma.19G162900.Wm82.a4.v1	(1 of 4) PTHR31529:SF10 - LOB DOMAIN-CONTAINING PROTEIN 16	yes|up
Glyma.18G003200.Wm82.a4.v1	(1 of 5) PTHR31062//PTHR31062:SF34 - FAMILY NOT NAMED // XYLOGLUCAN ENDOTRANSGLUCOSYLASE/HYDROLASE PROTEIN 15-RELATED	yes|down
Glyma.18G064100.Wm82.a4.v1	(1 of 3) PTHR27003//PTHR27003:SF63 - FAMILY NOT NAMED // CALMODULIN-BINDING RECEPTOR-LIKE CYTOPLASMIC KINASE 1	yes|up
Glyma.12G060900.Wm82.a4.v1	(1 of 2) PTHR11709//PTHR11709:SF78 - MULTI-COPPER OXIDASE // SUBFAMILY NOT NAMED	yes|down
Glyma.04G047100.Wm82.a4.v1	(1 of 7) PTHR22849:SF6 - U-BOX DOMAIN-CONTAINING PROTEIN 30-RELATED	yes|down
Glyma.04G230500.Wm82.a4.v1	(1 of 24) PF00560//PF07714//PF08263//PF13855 - Leucine Rich Repeat (LRR_1) // Protein tyrosine kinase (Pkinase_Tyr) // Leucine rich repeat N-terminal domain (LRRNT_2) // Leucine rich repeat (LRR_8)	yes|up
Glyma.14G089150.Wm82.a4.v1		yes|down
Glyma.10G196900.Wm82.a4.v1	(1 of 7) PF04578//PF13968 - Protein of unknown function, DUF594 (DUF594) // Domain of unknown function (DUF4220) (DUF4220)	yes|up
Glyma.17G048800.Wm82.a4.v1		yes|up
Glyma.02G292100.Wm82.a4.v1		yes|up
Glyma.08G347200.Wm82.a4.v1	(1 of 8) PTHR22880:SF156 - TRANSCRIPTION FACTOR GTE10	yes|up
Glyma.07G105000.Wm82.a4.v1	(1 of 2) K10732 - GINS complex subunit 1 (GINS1, PSF1)	yes|down
Glyma.16G216800.Wm82.a4.v1	(1 of 13) PTHR24015//PTHR24015:SF419 - FAMILY NOT NAMED // NUCLEOTIDE-DIPHOSPHO-SUGAR TRANSFERASE DOMAIN-CONTAINING PROTEIN-RELATED	yes|down
Glyma.13G352700.Wm82.a4.v1	(1 of 2) PTHR27003//PTHR27003:SF44 - FAMILY NOT NAMED // LRR RECEPTOR-LIKE SERINE/THREONINE-PROTEIN KINASE MEE39-RELATED	yes|up
Glyma.08G230100.Wm82.a4.v1	(1 of 37) PF00407 - Pathogenesis-related protein Bet v I family (Bet_v_1)	yes|up
Glyma.05G154900.Wm82.a4.v1	(1 of 65) PF05553 - Cotton fibre expressed protein (DUF761)	yes|up
Glyma.05G226900.Wm82.a4.v1	(1 of 4) PTHR21068:SF5 - GENOMIC DNA, CHROMOSOME 3, P1 CLONE: MIL23-RELATED	yes|down
Glyma.08G232100.Wm82.a4.v1	(1 of 3) PTHR10217//PTHR10217:SF520 - VOLTAGE AND LIGAND GATED POTASSIUM CHANNEL // SUBFAMILY NOT NAMED	yes|down
Glyma.16G198700.Wm82.a4.v1	(1 of 4) PTHR11206:SF103 - MATE EFFLUX FAMILY PROTEIN	yes|up
Glyma.20G241800.Wm82.a4.v1	(1 of 154) K00430 - peroxidase (E1.11.1.7)	yes|up
Glyma.16G217900.Wm82.a4.v1	(1 of 10) K01177 - beta-amylase (E3.2.1.2)	yes|down
Glyma.13G324700.Wm82.a4.v1	(1 of 4) PTHR31223:SF23 - CYTOKININ RIBOSIDE 5'-MONOPHOSPHATE PHOSPHORIBOHYDROLASE LOG1	yes|down
Glyma.18G177200.Wm82.a4.v1	(1 of 6) PTHR11709//PTHR11709:SF70 - MULTI-COPPER OXIDASE // SUBFAMILY NOT NAMED	yes|down
Glyma.19G142700.Wm82.a4.v1		yes|down
Glyma.15G096200.Wm82.a4.v1	(1 of 6) PTHR23244//PTHR23244:SF308 - KELCH REPEAT DOMAIN // KELCH REPEAT-CONTAINING PROTEIN	yes|down
Glyma.13G272100.Wm82.a4.v1	(1 of 3) PTHR10891:SF639 - CALCIUM-BINDING EF-HAND FAMILY PROTEIN-RELATED	yes|up
Glyma.08G007200.Wm82.a4.v1	(1 of 5) PTHR17130//PTHR17130:SF25 - MITOCHONDRIAL OUTER MEMBRANE PROTEIN 25 // SUBFAMILY NOT NAMED	yes|down
Glyma.05G006500.Wm82.a4.v1		yes|down
Glyma.12G087200.Wm82.a4.v1	(1 of 2) PTHR24296//PTHR24296:SF7 - FAMILY NOT NAMED // CYTOCHROME P450 94C1	yes|up
Glyma.07G170900.Wm82.a4.v1	(1 of 1) PTHR13871//PTHR13871:SF40 - THIOREDOXIN // SUBFAMILY NOT NAMED	yes|up
Glyma.14G078900.Wm82.a4.v1	(1 of 3) PTHR22844//PTHR22844:SF145 - F-BOX AND WD40 DOMAIN PROTEIN // SUBFAMILY NOT NAMED	yes|up
Glyma.09G036400.Wm82.a4.v1	(1 of 5) 2.5.1.43 - Nicotianamine synthase	yes|up
Glyma.07G210000.Wm82.a4.v1		yes|down
Glyma.03G157700.Wm82.a4.v1	(1 of 1) PF00122//PF00689//PF12710 - E1-E2 ATPase (E1-E2_ATPase) // Cation transporting ATPase, C-terminus (Cation_ATPase_C) // haloacid dehalogenase-like hydrolase (HAD)	yes|up
Glyma.13G236100.Wm82.a4.v1		yes|down
Glyma.07G019700.Wm82.a4.v1	(1 of 2) PTHR34787//PTHR34787:SF1 - FAMILY NOT NAMED // PHOTOSYSTEM I REACTION CENTER SUBUNIT VI-1, CHLOROPLASTIC-RELATED	yes|down
Glyma.11G230400.Wm82.a4.v1	(1 of 11) PTHR27003//PTHR27003:SF102 - FAMILY NOT NAMED // SERINE/THREONINE-PROTEIN KINASE-LIKE PROTEIN CCR3-RELATED	yes|up
Glyma.13G039200.Wm82.a4.v1	(1 of 5) PTHR10219:SF34 - GENOMIC DNA, CHROMOSOME 3, P1 CLONE: MXL8	yes|up
Glyma.15G159300.Wm82.a4.v1		yes|up
Glyma.18G034300.Wm82.a4.v1	(1 of 4) PROLINE-MULTI -	yes|down
Glyma.08G338900.Wm82.a4.v1	(1 of 7) PTHR11926//PTHR11926:SF189 - GLUCOSYL/GLUCURONOSYL TRANSFERASES // UDP-GLYCOSYLTRANSFERASE 72B2-RELATED	yes|down
Glyma.13G248500.Wm82.a4.v1	(1 of 5) PTHR27002//PTHR27002:SF157 - FAMILY NOT NAMED // G-TYPE LECTIN S-RECEPTOR-LIKE SERINE/THREONINE-PROTEIN KINASE SD1-13	yes|up
Glyma.07G083700.Wm82.a4.v1	(1 of 2) PTHR21234//PTHR21234:SF19 - PURINE NUCLEOSIDE PHOSPHORYLASE // PHOSPHORYLASE SUPERFAMILY PROTEIN	yes|up
Glyma.06G145300.Wm82.a4.v1	(1 of 4) PTHR31388:SF24 - PEROXIDASE 52	yes|down
Glyma.10G066700.Wm82.a4.v1	(1 of 13) K01623 - fructose-bisphosphate aldolase, class I (ALDO)	yes|up
Glyma.12G196700.Wm82.a4.v1	(1 of 2) PTHR23042//PTHR23042:SF56 - CIRCADIAN PROTEIN CLOCK/ARNT/BMAL/PAS // SUBFAMILY NOT NAMED	yes|up
Glyma.05G194400.Wm82.a4.v1	(1 of 4) PTHR22870//PTHR22870:SF193 - REGULATOR OF CHROMOSOME CONDENSATION // SUBFAMILY NOT NAMED	yes|down
Glyma.02G007400.Wm82.a4.v1	(1 of 2) PTHR22595//PTHR22595:SF35 - CHITINASE-RELATED // SUBFAMILY NOT NAMED	yes|up
Glyma.10G045400.Wm82.a4.v1	(1 of 12) PTHR26374//PTHR26374:SF198 - FAMILY NOT NAMED // ZINC FINGER PROTEIN ZAT11	yes|up
Glyma.14G165700.Wm82.a4.v1	(1 of 8) K13414 - mitogen-activated protein kinase kinase kinase 1, plant (MEKK1P)	yes|down
Glyma.12G217500.Wm82.a4.v1	(1 of 6) PTHR23050//PTHR23050:SF170 - CALCIUM BINDING PROTEIN // SUBFAMILY NOT NAMED	yes|up
Glyma.14G188800.Wm82.a4.v1		yes|up
Glyma.08G339800.Wm82.a4.v1	(1 of 2) 1.14.11.6 - Thymine dioxygenase / Thymine,2-oxoglutarate dioxygenase	yes|down
Glyma.11G148300.Wm82.a4.v1	(1 of 36) PTHR32077//PTHR32077:SF7 - FAMILY NOT NAMED // FASCICLIN-LIKE ARABINOGALACTAN PROTEIN 11	yes|down
Glyma.09G208200.Wm82.a4.v1	(1 of 2) 2.4.1.12//2.4.2.24 - Cellulose synthase (UDP-forming) / UDP-glucose-cellulose glucosyltransferase // 1,4-beta-D-xylan synthase	yes|up
Glyma.19G076000.Wm82.a4.v1	(1 of 24) PF01107 - Viral movement protein (MP) (MP)	yes|up
Glyma.16G013000.Wm82.a4.v1	(1 of 38) PF04570 - zinc-finger of the FCS-type, C2-C2 (zf-FLZ)	yes|up
Glyma.16G135200.Wm82.a4.v1	(1 of 50) PTHR11017//PTHR11017:SF171 - LEUCINE-RICH REPEAT-CONTAINING PROTEIN // SUBFAMILY NOT NAMED	yes|up
Glyma.08G021800.Wm82.a4.v1		yes|up
Glyma.04G060800.Wm82.a4.v1	(1 of 4) PTHR32370:SF7 - BTB/POZ DOMAIN-CONTAINING PROTEIN NPY1	yes|down
Glyma.16G178500.Wm82.a4.v1	(1 of 17) PTHR22814//PTHR22814:SF129 - COPPER TRANSPORT PROTEIN ATOX1-RELATED // COPPER TRANSPORT FAMILY PROTEIN-RELATED	yes|up
Glyma.06G100000.Wm82.a4.v1	(1 of 4) PTHR11969//PTHR11969:SF19 - MAX DIMERIZATION, MAD // SUBFAMILY NOT NAMED	yes|down
Glyma.12G110100.Wm82.a4.v1		yes|up
Glyma.01G043300.Wm82.a4.v1	(1 of 176) PF03106 - WRKY DNA -binding domain (WRKY)	yes|up
Glyma.16G175600.Wm82.a4.v1	(1 of 2) K13263 - isoflavone 7-O-glucosyltransferase (IF7GT)	yes|down
Glyma.11G148100.Wm82.a4.v1	(1 of 36) PTHR32077//PTHR32077:SF7 - FAMILY NOT NAMED // FASCICLIN-LIKE ARABINOGALACTAN PROTEIN 11	yes|down
Glyma.17G230500.Wm82.a4.v1	(1 of 5) PF01439 - Metallothionein (Metallothio_2)	yes|up
Glyma.01G126600.Wm82.a4.v1	(1 of 13) PTHR21495//PTHR21495:SF77 - NUCLEOPORIN-RELATED // DIRIGENT PROTEIN 19	yes|up
Glyma.08G015700.Wm82.a4.v1	(1 of 2) PTHR14499:SF11 - PROTEIN VM106R.1	yes|up
Glyma.10G253100.Wm82.a4.v1	(1 of 29) PTHR27002//PTHR27002:SF122 - FAMILY NOT NAMED // CYSTEINE-RICH RECEPTOR-LIKE PROTEIN KINASE 28-RELATED	yes|up
Glyma.06G176700.Wm82.a4.v1	(1 of 30) PF05910 - Plant protein of unknown function (DUF868) (DUF868)	yes|down
Glyma.13G053700.Wm82.a4.v1	(1 of 35) PF07714//PF11721 - Protein tyrosine kinase (Pkinase_Tyr) // Di-glucose binding within endoplasmic reticulum (Malectin)	yes|up
Glyma.14G148100.Wm82.a4.v1	(1 of 131) PF00892 - EamA-like transporter family (EamA)	yes|up
Glyma.02G232400.Wm82.a4.v1	(1 of 6) PTHR22835//PTHR22835:SF261 - ZINC FINGER FYVE DOMAIN CONTAINING PROTEIN // SUBFAMILY NOT NAMED	yes|down
Glyma.05G150600.Wm82.a4.v1	(1 of 5) 2.4.1.271 - Crocetin glucosyltransferase / UGT75L6	yes|down
Glyma.09G161400.Wm82.a4.v1	(1 of 1) PF00931//PF13191//PF13456//PF13676//PF13966 - NB-ARC domain (NB-ARC) // AAA ATPase domain (AAA_16) // Reverse transcriptase-like (RVT_3) // TIR domain (TIR_2) // zinc-binding in reverse transcriptase (zf-RVT)	yes|up
Glyma.16G133800.Wm82.a4.v1	(1 of 19) 1.14.13.109 - Abieta-7,13-dien-18-ol hydroxylase / CYP720B1	yes|up
Glyma.20G144000.Wm82.a4.v1	(1 of 85) PF02298 - Plastocyanin-like domain (Cu_bind_like)	yes|down
Glyma.08G110420.Wm82.a4.v1	(1 of 20) 2.3.1.74 - Naringenin-chalcone synthase / Flavonone synthase	yes|up
Glyma.11G043800.Wm82.a4.v1	(1 of 49) KOG0472//KOG1187 - Leucine-rich repeat protein // Serine/threonine protein kinase	yes|down
Glyma.14G018500.Wm82.a4.v1	(1 of 7) PTHR19321//PTHR19321:SF11 - PROTEIN REGULATOR OF CYTOKINESIS 1 PRC1-RELATED // SUBFAMILY NOT NAMED	yes|up
Glyma.12G077500.Wm82.a4.v1	(1 of 2227) 2.7.11.1 - Non-specific serine/threonine protein kinase / Threonine-specific protein kinase	yes|up
Glyma.15G044300.Wm82.a4.v1	(1 of 1) K10869 - RAD51-like protein 1 (RAD51L1, RAD51B)	yes|down
Glyma.03G259200.Wm82.a4.v1	(1 of 4) PTHR24073//PTHR24073:SF345 - FAMILY NOT NAMED // RAS-RELATED PROTEIN RABA3	yes|down
Glyma.19G011400.Wm82.a4.v1	(1 of 2) PTHR11527//PTHR11527:SF170 - SMALL HEAT-SHOCK PROTEIN HSP20 FAMILY // SUBFAMILY NOT NAMED	yes|down
Glyma.06G186200.Wm82.a4.v1		yes|up
Glyma.04G151600.Wm82.a4.v1	(1 of 4) PTHR31727:SF2 - PALMITOYL-ACYL CARRIER PROTEIN THIOESTERASE, CHLOROPLASTIC	yes|down
Glyma.13G070450.Wm82.a4.v1		yes|up
Glyma.09G014900.Wm82.a4.v1	(1 of 8) PTHR27005//PTHR27005:SF7 - FAMILY NOT NAMED // WALL-ASSOCIATED RECEPTOR KINASE-LIKE 1-RELATED	yes|up
Glyma.20G169000.Wm82.a4.v1	(1 of 2227) 2.7.11.1 - Non-specific serine/threonine protein kinase / Threonine-specific protein kinase	yes|up
Glyma.01G011300.Wm82.a4.v1	(1 of 99) PF01535//PF13041//PF14432 - PPR repeat (PPR) // PPR repeat family (PPR_2) // DYW family of nucleic acid deaminases (DYW_deaminase)	yes|down
Glyma.09G051900.Wm82.a4.v1	(1 of 74) PF05678 - VQ motif (VQ)	yes|up
Glyma.01G036900.Wm82.a4.v1	(1 of 6) 3.4.24.7 - Interstitial collagenase / Vertebrate collagenase	yes|up
Glyma.12G049300.Wm82.a4.v1		yes|up
Glyma.16G149600.Wm82.a4.v1	(1 of 65) PF05553 - Cotton fibre expressed protein (DUF761)	yes|down
Glyma.11G057200.Wm82.a4.v1		yes|up
Glyma.16G137000.Wm82.a4.v1	(1 of 50) PTHR11017//PTHR11017:SF171 - LEUCINE-RICH REPEAT-CONTAINING PROTEIN // SUBFAMILY NOT NAMED	yes|up
Glyma.08G169451.Wm82.a4.v1	(1 of 2) PTHR31719//PTHR31719:SF42 - FAMILY NOT NAMED // GENOMIC DNA, CHROMOSOME 3, P1 CLONE: MGH6	yes|up
Glyma.11G148200.Wm82.a4.v1	(1 of 36) PTHR32077//PTHR32077:SF7 - FAMILY NOT NAMED // FASCICLIN-LIKE ARABINOGALACTAN PROTEIN 11	yes|down
Glyma.02G148200.Wm82.a4.v1	(1 of 6) PTHR13683//PTHR13683:SF379 - ASPARTYL PROTEASES // ASPARTYL PROTEASE-LIKE PROTEIN	yes|up
Glyma.11G038600.Wm82.a4.v1	(1 of 18) K13464 - jasmonate ZIM domain-containing protein (JAZ)	yes|up
Glyma.08G045200.Wm82.a4.v1	(1 of 4) PTHR12629:SF4 - NUDIX HYDROLASE 17, MITOCHONDRIAL-RELATED	yes|up
Glyma.11G104100.Wm82.a4.v1	(1 of 2) PF11267 - Domain of unknown function (DUF3067) (DUF3067)	yes|down
Glyma.13G309600.Wm82.a4.v1		yes|down
Glyma.20G134200.Wm82.a4.v1	(1 of 5) PTHR31490:SF18 - 1,4-BETA-XYLAN ENDOHYDROLASE-RELATED	yes|up
Glyma.13G067900.Wm82.a4.v1	(1 of 2) PTHR13778//PTHR13778:SF7 - GLYCOSYLTRANSFERASE 8 DOMAIN-CONTAINING PROTEIN // GALACTURONOSYLTRANSFERASE-LIKE 8-RELATED	yes|up
Glyma.04G223300.Wm82.a4.v1	(1 of 176) PF03106 - WRKY DNA -binding domain (WRKY)	yes|up
Glyma.03G220000.Wm82.a4.v1		yes|down
Glyma.06G264200.Wm82.a4.v1	(1 of 55) PTHR11017//PTHR11017:SF155 - LEUCINE-RICH REPEAT-CONTAINING PROTEIN // SUBFAMILY NOT NAMED	yes|up
Glyma.12G143200.Wm82.a4.v1	(1 of 27) PTHR27002//PTHR27002:SF9 - FAMILY NOT NAMED // CYSTEINE-RICH RECEPTOR-LIKE PROTEIN KINASE 27-RELATED	yes|down
Glyma.04G179400.Wm82.a4.v1	(1 of 5) PF04134 - Protein of unknown function, DUF393 (DUF393)	yes|down
Glyma.20G151800.Wm82.a4.v1	(1 of 4) PTHR27000//PTHR27000:SF84 - FAMILY NOT NAMED // LRR RECEPTOR-LIKE SERINE/THREONINE-PROTEIN KINASE ERL1-RELATED	yes|down
Glyma.13G262400.Wm82.a4.v1	(1 of 3) PTHR31044:SF19 - CARBOHYDRATE-BINDING X8 DOMAIN-CONTAINING PROTEIN-RELATED	yes|down
Glyma.17G081300.Wm82.a4.v1	(1 of 1) PTHR31964:SF5 - ADENINE NUCLEOTIDE ALPHA HYDROLASES-LIKE PROTEIN-RELATED	yes|up
Glyma.19G132500.Wm82.a4.v1	(1 of 3) PTHR13935:SF41 - ACHAETE-SCUTE HOMOLOG 3	yes|up
Glyma.17G106300.Wm82.a4.v1	(1 of 4) PTHR31065//PTHR31065:SF11 - FAMILY NOT NAMED // PLATZ TRANSCRIPTION FACTOR FAMILY PROTEIN	yes|down
Glyma.13G052800.Wm82.a4.v1	(1 of 5) PTHR10209//PTHR10209:SF124 - OXIDOREDUCTASE, 2OG-FE II OXYGENASE FAMILY PROTEIN // SUBFAMILY NOT NAMED	yes|up
Glyma.10G041200.Wm82.a4.v1	(1 of 3) PTHR33271//PTHR33271:SF3 - FAMILY NOT NAMED // CUPIN DOMAIN-CONTAINING PROTEIN	yes|up
Glyma.11G178800.Wm82.a4.v1	(1 of 2) 1.3.1.3//1.3.99.6 - Delta(4)-3-oxosteroid 5-beta-reductase / Testosterone 5-beta-reductase // 3-oxo-5-beta-steroid 4-dehydrogenase / Delta(4)-3-ketosteroid 5-beta-reductase	yes|up
Glyma.19G161700.Wm82.a4.v1	(1 of 2) PTHR10825//PTHR10825:SF28 - RING FINGER DOMAIN-CONTAINING, POLYCOMB GROUP COMPONENT // SUBFAMILY NOT NAMED	yes|down
Glyma.04G220600.Wm82.a4.v1	(1 of 4) PTHR31388:SF24 - PEROXIDASE 52	yes|down
Glyma.19G018700.Wm82.a4.v1	(1 of 1) PTHR23070//PTHR23070:SF19 - BCS1 AAA-TYPE ATPASE // SUBFAMILY NOT NAMED	yes|down
Glyma.19G086100.Wm82.a4.v1	(1 of 21) PTHR31238//PTHR31238:SF42 - FAMILY NOT NAMED // GERMIN-LIKE PROTEIN SUBFAMILY 1 MEMBER 10-RELATED	yes|up
Glyma.06G084800.Wm82.a4.v1	(1 of 5) PTHR14155//PTHR14155:SF95 - RING FINGER DOMAIN-CONTAINING // E3 UBIQUITIN-PROTEIN LIGASE ATL42-RELATED	yes|up
Glyma.11G036400.Wm82.a4.v1	(1 of 70) K09286 - EREBP-like factor (EREBP)	yes|up
Glyma.05G211700.Wm82.a4.v1	(1 of 3) PTHR11751//PTHR11751:SF380 - SUBGROUP I AMINOTRANSFERASE RELATED // 1-AMINOCYCLOPROPANE-1-CARBOXYLATE SYNTHASE 2-RELATED	yes|up
Glyma.19G255400.Wm82.a4.v1	(1 of 15) 1.1.1.317 - Perakine reductase	yes|up
Glyma.17G027800.Wm82.a4.v1	(1 of 38) PF04570 - zinc-finger of the FCS-type, C2-C2 (zf-FLZ)	yes|down
Glyma.03G016200.Wm82.a4.v1	(1 of 17) PTHR32246:SF20 - BON1-ASSOCIATED PROTEIN 1-RELATED	yes|up
Glyma.14G022700.Wm82.a4.v1		yes|up
Glyma.20G241700.Wm82.a4.v1	(1 of 4) K01859 - chalcone isomerase (E5.5.1.6)	yes|down
Glyma.15G251600.Wm82.a4.v1	(1 of 3) PTHR11260:SF204 - GLUTATHIONE S-TRANSFERASE U21-RELATED	yes|down
Glyma.06G114200.Wm82.a4.v1	(1 of 5) PTHR13683:SF316 - ASPARTYL PROTEASE FAMILY PROTEIN-RELATED	yes|up
Glyma.01G215700.Wm82.a4.v1	(1 of 2) K16250 - DNA-directed RNA polymerase IV subunit 1 [EC:2.7.7.6] (NRPD1)	yes|down
Glyma.13G077800.Wm82.a4.v1	(1 of 131) PF00892 - EamA-like transporter family (EamA)	yes|down
Glyma.12G002400.Wm82.a4.v1	(1 of 1) PTHR27003//PTHR27003:SF38 - FAMILY NOT NAMED // SERINE/THREONINE-PROTEIN KINASE-LIKE PROTEIN CCR4	yes|up
Glyma.07G228300.Wm82.a4.v1	(1 of 2) K00592 - [ribulose-bisphosphate carboxylase]-lysine N-methyltransferase (E2.1.1.127)	yes|down
Glyma.01G011600.Wm82.a4.v1	(1 of 10) PTHR21493//PTHR21493:SF2 - CGI-141-RELATED/LIPASE CONTAINING PROTEIN // SUBFAMILY NOT NAMED	yes|up
Glyma.01G231000.Wm82.a4.v1	(1 of 349) PF00847 - AP2 domain (AP2)	yes|up
Glyma.03G035300.Wm82.a4.v1	(1 of 2227) 2.7.11.1 - Non-specific serine/threonine protein kinase / Threonine-specific protein kinase	yes|up
Glyma.13G233300.Wm82.a4.v1	(1 of 5) PTHR18966//PTHR18966:SF233 - IONOTROPIC GLUTAMATE RECEPTOR // SUBFAMILY NOT NAMED	yes|up
Glyma.03G168900.Wm82.a4.v1	(1 of 3) PTHR33271//PTHR33271:SF3 - FAMILY NOT NAMED // CUPIN DOMAIN-CONTAINING PROTEIN	yes|up
Glyma.13G199500.Wm82.a4.v1	(1 of 11) PTHR10502//PTHR10502:SF113 - ANNEXIN // SUBFAMILY NOT NAMED	yes|down
Glyma.03G063400.Wm82.a4.v1	(1 of 65) PF03140 - Plant protein of unknown function (DUF247)	yes|up
Glyma.02G243300.Wm82.a4.v1		yes|up
Glyma.15G021400.Wm82.a4.v1	(1 of 4) PF00560//PF07714//PF12819 - Leucine Rich Repeat (LRR_1) // Protein tyrosine kinase (Pkinase_Tyr) // Carbohydrate-binding protein of the ER (Malectin_like)	yes|up
Glyma.09G251600.Wm82.a4.v1	(1 of 2) PTHR31752//PTHR31752:SF2 - FAMILY NOT NAMED // AUXIN EFFLUX CARRIER COMPONENT 8-RELATED	yes|up
Glyma.14G200200.Wm82.a4.v1	(1 of 8) K13424 - WRKY transcription factor 33 (WRKY33)	yes|up
Glyma.04G147000.Wm82.a4.v1	(1 of 6) K14515 - EIN3-binding F-box protein (EBF1_2)	yes|up
Glyma.07G265500.Wm82.a4.v1		yes|down
Glyma.03G253200.Wm82.a4.v1	(1 of 8) PTHR33509:SF5 - LATE EMBRYOGENESIS ABUNDANT 3 (LEA3) FAMILY PROTEIN	yes|up
Glyma.20G150100.Wm82.a4.v1	(1 of 2) PTHR23418//PTHR23418:SF4 - ACIREDUCTONE DIOXYGENASE // 1,2-DIHYDROXY-3-KETO-5-METHYLTHIOPENTENE DIOXYGENASE 4	yes|up
Glyma.03G264300.Wm82.a4.v1	(1 of 5) PTHR11771//PTHR11771:SF38 - LIPOXYGENASE // LIPOXYGENASE 3, CHLOROPLASTIC-RELATED	yes|up
Glyma.13G242700.Wm82.a4.v1		yes|up
Glyma.05G178700.Wm82.a4.v1	(1 of 3) PTHR10502:SF98 - ANNEXIN D1-RELATED	yes|down
Glyma.06G136000.Wm82.a4.v1		yes|up
Glyma.14G012900.Wm82.a4.v1	(1 of 4) PTHR13301//PTHR13301:SF54 - X-BOX TRANSCRIPTION FACTOR-RELATED // SUBFAMILY NOT NAMED	yes|down
Glyma.02G174400.Wm82.a4.v1	(1 of 2) PF10183 - ESSS subunit of NADH:ubiquinone oxidoreductase (complex I) (ESSS)	yes|down
Glyma.12G130200.Wm82.a4.v1	(1 of 38) K01188 - beta-glucosidase (E3.2.1.21)	yes|up
Glyma.09G282900.Wm82.a4.v1	(1 of 1) PTHR24286:SF86 - ABSCISIC ACID 8'-HYDROXYLASE 2	yes|up
Glyma.16G119800.Wm82.a4.v1	(1 of 25) PTHR27007//PTHR27007:SF24 - FAMILY NOT NAMED // L-TYPE LECTIN-DOMAIN CONTAINING RECEPTOR KINASE IX.1-RELATED	yes|up
Glyma.07G258100.Wm82.a4.v1		yes|down
Glyma.05G143400.Wm82.a4.v1		yes|up
Glyma.13G283600.Wm82.a4.v1	(1 of 6) PTHR23050//PTHR23050:SF170 - CALCIUM BINDING PROTEIN // SUBFAMILY NOT NAMED	yes|up
Glyma.13G037400.Wm82.a4.v1	(1 of 5) PF05631 - Sugar-tranasporters, 12 TM (MFS_5)	yes|down
Glyma.19G255500.Wm82.a4.v1	(1 of 8) PTHR10217//PTHR10217:SF465 - VOLTAGE AND LIGAND GATED POTASSIUM CHANNEL // CYCLIC NUCLEOTIDE-GATED ION CHANNEL 11-RELATED	yes|up
Glyma.03G073734.Wm82.a4.v1	(1 of 1) 2.4.1.203//2.4.1.323 - Trans-zeatin O-beta-D-glucosyltransferase / Zeatin O-glucosyltransferase // 7-deoxyloganetic acid glucosyltransferase	yes|up
Glyma.02G259300.Wm82.a4.v1	(1 of 4) PTHR31388:SF24 - PEROXIDASE 52	yes|down
Glyma.15G159500.Wm82.a4.v1		yes|up
Glyma.20G133200.Wm82.a4.v1	(1 of 4) PTHR26374:SF208 - ZINC FINGER PROTEIN AZF3-RELATED	yes|up
Glyma.13G054300.Wm82.a4.v1	(1 of 35) PF07714//PF11721 - Protein tyrosine kinase (Pkinase_Tyr) // Di-glucose binding within endoplasmic reticulum (Malectin)	yes|up
Glyma.12G069301.Wm82.a4.v1		yes|down
Glyma.08G021900.Wm82.a4.v1	(1 of 176) PF03106 - WRKY DNA -binding domain (WRKY)	yes|up
Glyma.19G033100.Wm82.a4.v1	(1 of 1) PF00069//PF07714//PF11721//PF12819 - Protein kinase domain (Pkinase) // Protein tyrosine kinase (Pkinase_Tyr) // Di-glucose binding within endoplasmic reticulum (Malectin) // Carbohydrate-binding protein of the ER (Malectin_like)	yes|up
Glyma.04G020700.Wm82.a4.v1		yes|up
Glyma.13G234700.Wm82.a4.v1	(1 of 4) PTHR31079:SF5 - NAC DOMAIN CONTAINING PROTEIN 10	yes|down
Glyma.09G201000.Wm82.a4.v1	(1 of 79) PF02701 - Dof domain, zinc finger (zf-Dof)	yes|down
Glyma.09G241800.Wm82.a4.v1	(1 of 2) PTHR24326:SF269 - HOMEOBOX-LEUCINE ZIPPER PROTEIN ATHB-4	yes|down
Glyma.17G233600.Wm82.a4.v1	(1 of 7) PTHR22849:SF6 - U-BOX DOMAIN-CONTAINING PROTEIN 30-RELATED	yes|down
Glyma.11G044500.Wm82.a4.v1		yes|down
Glyma.07G270800.Wm82.a4.v1	(1 of 7) PTHR27003:SF15 - LEUCINE-RICH REPEAT PROTEIN KINASE-LIKE PROTEIN	yes|up
Glyma.04G228800.Wm82.a4.v1		yes|up
Glyma.05G192500.Wm82.a4.v1	(1 of 171) PF02365 - No apical meristem (NAM) protein (NAM)	yes|down
Glyma.01G016600.Wm82.a4.v1	(1 of 3) PTHR10641//PTHR10641:SF579 - MYB-LIKE DNA-BINDING PROTEIN MYB // MYB DOMAIN PROTEIN 9	yes|up
Glyma.18G291700.Wm82.a4.v1	(1 of 11) PTHR22814//PTHR22814:SF47 - COPPER TRANSPORT PROTEIN ATOX1-RELATED // SUBFAMILY NOT NAMED	yes|down
Glyma.18G218500.Wm82.a4.v1	(1 of 6) PTHR24282:SF36 - CYTOCHROME P450 714A1-RELATED	yes|down
Glyma.15G276500.Wm82.a4.v1	(1 of 3) K13366 - polyamine oxidase (MPAO, PAO1)	yes|down
Glyma.18G208800.Wm82.a4.v1	(1 of 8) K13424 - WRKY transcription factor 33 (WRKY33)	yes|up
Glyma.14G124400.Wm82.a4.v1	(1 of 78) PF00069//PF08263//PF13855 - Protein kinase domain (Pkinase) // Leucine rich repeat N-terminal domain (LRRNT_2) // Leucine rich repeat (LRR_8)	yes|down
Glyma.02G202600.Wm82.a4.v1	(1 of 310) PF00010 - Helix-loop-helix DNA-binding domain (HLH)	yes|up
Glyma.09G159400.Wm82.a4.v1	(1 of 3) 1.1.1.179 - D-xylose 1-dehydrogenase (NADP(+)) / D-xylose-NADP dehydrogenase	yes|up
Glyma.12G142100.Wm82.a4.v1	(1 of 2) KOG0580//KOG0984//KOG1187//KOG2345 - Serine/threonine protein kinase // Mitogen-activated protein kinase (MAPK) kinase MKK3/MKK6 // Serine/threonine protein kinase // Serine/threonine protein kinase/TGF-beta stimulated factor	yes|up
Glyma.16G180300.Wm82.a4.v1	(1 of 191) PF00168 - C2 domain (C2)	yes|up
Glyma.19G192300.Wm82.a4.v1	(1 of 3) PTHR21654//PTHR21654:SF5 - FAMILY NOT NAMED // TRIHELIX TRANSCRIPTION FACTOR PTL	yes|down
Glyma.18G249100.Wm82.a4.v1	(1 of 4) PTHR19317//PTHR19317:SF15 - PRENYLATED RAB ACCEPTOR 1-RELATED // SUBFAMILY NOT NAMED	yes|up
Glyma.08G180900.Wm82.a4.v1	(1 of 4) K15920 - beta-D-xylosidase 4 (XYL4)	yes|down
Glyma.04G050800.Wm82.a4.v1	(1 of 3) PTHR11850:SF92 - HOMEOBOX PROTEIN ATH1	yes|down
Glyma.15G077100.Wm82.a4.v1	(1 of 349) PF00847 - AP2 domain (AP2)	yes|up
Glyma.14G198900.Wm82.a4.v1	(1 of 4) PTHR11709:SF68 - LACCASE-13-RELATED	yes|down
Glyma.14G081300.Wm82.a4.v1	(1 of 20) KOG0513 - Ca2+-independent phospholipase A2	yes|up
Glyma.02G264600.Wm82.a4.v1	(1 of 3) PTHR31642:SF19 - COA-DEPENDENT ACYLTRANSFERASE-RELATED	yes|down
Glyma.01G036300.Wm82.a4.v1		yes|up
Glyma.13G095100.Wm82.a4.v1	(1 of 9) PTHR31062//PTHR31062:SF32 - FAMILY NOT NAMED // XYLOGLUCAN ENDOTRANSGLUCOSYLASE/HYDROLASE PROTEIN 25-RELATED	yes|up
Glyma.11G151000.Wm82.a4.v1	(1 of 8) PF00280 - Potato inhibitor I family (potato_inhibit)	yes|up
Glyma.01G206100.Wm82.a4.v1	(1 of 1) PTHR36368:SF1 - GENOMIC DNA, CHROMOSOME 3, TAC CLONE:K17E7	yes|down
Glyma.12G048500.Wm82.a4.v1	(1 of 124) PF02362 - B3 DNA binding domain (B3)	yes|up
Glyma.02G128800.Wm82.a4.v1	(1 of 4) PF06880 - Protein of unknown function (DUF1262) (DUF1262)	yes|up
Glyma.06G276500.Wm82.a4.v1		yes|up
Glyma.08G320200.Wm82.a4.v1	(1 of 176) PF03106 - WRKY DNA -binding domain (WRKY)	yes|up
Glyma.02G172200.Wm82.a4.v1	(1 of 3) PTHR27007:SF56 - L-TYPE LECTIN-DOMAIN CONTAINING RECEPTOR KINASE S.5-RELATED	yes|up
Glyma.12G079800.Wm82.a4.v1	(1 of 2) PTHR10641//PTHR10641:SF506 - MYB-LIKE DNA-BINDING PROTEIN MYB // SUBFAMILY NOT NAMED	yes|down
Glyma.20G022500.Wm82.a4.v1	(1 of 2) PTHR11040:SF48 - ZINC TRANSPORTER 10-RELATED	yes|up
Glyma.06G154500.Wm82.a4.v1	(1 of 4) PTHR19241//PTHR19241:SF230 - ATP-BINDING CASSETTE TRANSPORTER // ABC TRANSPORTER G FAMILY MEMBER 5	yes|down
Glyma.08G326000.Wm82.a4.v1	(1 of 4) PTHR24009//PTHR24009:SF4 - FAMILY NOT NAMED // ZINC FINGER CCCH DOMAIN-CONTAINING PROTEIN 18	yes|down
Glyma.13G175300.Wm82.a4.v1		yes|down
Glyma.07G057100.Wm82.a4.v1	(1 of 24) PF11820 - Protein of unknown function (DUF3339) (DUF3339)	yes|down
Glyma.08G121200.Wm82.a4.v1	(1 of 5) PTHR31062//PTHR31062:SF34 - FAMILY NOT NAMED // XYLOGLUCAN ENDOTRANSGLUCOSYLASE/HYDROLASE PROTEIN 15-RELATED	yes|down
Glyma.14G089200.Wm82.a4.v1	(1 of 349) PF00847 - AP2 domain (AP2)	yes|down
Glyma.15G109500.Wm82.a4.v1	(1 of 17) PF14476 - Petal formation-expressed (Chloroplast_duf)	yes|up
Glyma.15G078600.Wm82.a4.v1	(1 of 3) PTHR10168:SF69 - GLUTAREDOXIN-C9	yes|up
Glyma.03G138700.Wm82.a4.v1		yes|up
Glyma.10G148700.Wm82.a4.v1	(1 of 19) PF07887 - Calmodulin binding protein-like (Calmodulin_bind)	yes|up
Glyma.20G061100.Wm82.a4.v1	(1 of 1) PTHR22298//PTHR22298:SF39 - ENDO-1,4-BETA-GLUCANASE // ENDOGLUCANASE 7	yes|up
Glyma.03G201000.Wm82.a4.v1	(1 of 16) PTHR31415:SF4 - HARPIN-INDUCED PROTEIN-LIKE-RELATED	yes|up
Glyma.16G210600.Wm82.a4.v1	(1 of 50) PTHR11017//PTHR11017:SF171 - LEUCINE-RICH REPEAT-CONTAINING PROTEIN // SUBFAMILY NOT NAMED	yes|up
Glyma.01G044800.Wm82.a4.v1	(1 of 6) PTHR12565//PTHR12565:SF148 - STEROL REGULATORY ELEMENT-BINDING PROTEIN // PROTEIN BANQUO 3	yes|down
Glyma.15G140200.Wm82.a4.v1	(1 of 3) PTHR23118:SF6 - ATP-CITRATE SYNTHASE BETA CHAIN PROTEIN 1	yes|down
Glyma.18G052600.Wm82.a4.v1		yes|down
Glyma.18G026700.Wm82.a4.v1	(1 of 11) PTHR27003//PTHR27003:SF102 - FAMILY NOT NAMED // SERINE/THREONINE-PROTEIN KINASE-LIKE PROTEIN CCR3-RELATED	yes|up
Glyma.20G009000.Wm82.a4.v1	(1 of 80) PF14009 - Domain of unknown function (DUF4228) (DUF4228)	yes|up
Glyma.06G099700.Wm82.a4.v1	(1 of 3) PTHR22951//PTHR22951:SF24 - CLATHRIN ASSEMBLY PROTEIN // SUBFAMILY NOT NAMED	yes|up
Glyma.13G196200.Wm82.a4.v1	(1 of 4) PTHR13683//PTHR13683:SF258 - ASPARTYL PROTEASES // ASPARTYL PROTEASE FAMILY PROTEIN-RELATED	yes|down
Glyma.08G151100.Wm82.a4.v1		yes|up
Glyma.14G064200.Wm82.a4.v1	(1 of 14) PTHR10795//PTHR10795:SF348 - PROPROTEIN CONVERTASE SUBTILISIN/KEXIN // SUBFAMILY NOT NAMED	yes|down
Glyma.14G089039.Wm82.a4.v1		yes|down
Glyma.03G206800.Wm82.a4.v1	(1 of 1) PTHR10992//PTHR10992:SF822 - ALPHA/BETA HYDROLASE FOLD-CONTAINING PROTEIN // SUBFAMILY NOT NAMED	yes|up
Glyma.02G151700.Wm82.a4.v1	(1 of 154) K00430 - peroxidase (E1.11.1.7)	yes|up
Glyma.18G180400.Wm82.a4.v1	(1 of 4) PTHR13832//PTHR13832:SF228 - PROTEIN PHOSPHATASE 2C // PROTEIN PHOSPHATASE 2C 36-RELATED	yes|up
Glyma.09G127200.Wm82.a4.v1	(1 of 10) 2.4.1.170 - Isoflavone 7-O-glucosyltransferase	yes|up
Glyma.08G230400.Wm82.a4.v1	(1 of 37) PF00407 - Pathogenesis-related protein Bet v I family (Bet_v_1)	yes|down
Glyma.03G158000.Wm82.a4.v1	(1 of 4) PTHR33591:SF3 - BETA-CAROTENE ISOMERASE D27, CHLOROPLASTIC	yes|up
Glyma.19G216300.Wm82.a4.v1	(1 of 4) PTHR33921//PTHR33921:SF2 - FAMILY NOT NAMED // CALVIN CYCLE PROTEIN CP12-1, CHLOROPLASTIC-RELATED	yes|down
Glyma.10G007000.Wm82.a4.v1	(1 of 16) K14516 - ethylene-responsive transcription factor 1 (ERF1)	yes|up
Glyma.12G138900.Wm82.a4.v1		yes|up
Glyma.06G092600.Wm82.a4.v1	(1 of 24) PF12854//PF13041 - PPR repeat (PPR_1) // PPR repeat family (PPR_2)	yes|down
Glyma.15G057700.Wm82.a4.v1	(1 of 2) PTHR11002//PTHR11002:SF12 - CARBONIC ANHYDRASE // SUBFAMILY NOT NAMED	yes|down
Glyma.13G259200.Wm82.a4.v1		yes|down
Glyma.12G239700.Wm82.a4.v1	(1 of 2) PTHR11017:SF169 - DISEASE RESISTANCE PROTEIN-RELATED	yes|up
Glyma.19G199300.Wm82.a4.v1	(1 of 6) PTHR22849:SF38 - E3 UBIQUITIN-PROTEIN LIGASE PUB22-RELATED	yes|up
Glyma.10G202400.Wm82.a4.v1	(1 of 3) K00517 - E1.14.-.-	yes|down
Glyma.11G043700.Wm82.a4.v1	(1 of 4) PTHR23042:SF25 - TRANSCRIPTION FACTOR NAI1	yes|up
Glyma.06G050900.Wm82.a4.v1	(1 of 3) PTHR13832//PTHR13832:SF315 - PROTEIN PHOSPHATASE 2C // PROTEIN PHOSPHATASE 2C 61-RELATED	yes|up
Glyma.10G071700.Wm82.a4.v1	(1 of 5) PTHR22952:SF217 - PROTEIN ABSCISIC ACID-INSENSITIVE 5	yes|down
Glyma.08G070600.Wm82.a4.v1	(1 of 2) K02548 - 1,4-dihydroxy-2-naphthoate octaprenyltransferase (menA)	yes|down
Glyma.16G204600.Wm82.a4.v1	(1 of 3) PTHR11902//PTHR11902:SF18 - ENOLASE // SUBFAMILY NOT NAMED	yes|down
Glyma.12G121000.Wm82.a4.v1	(1 of 6) PTHR13301//PTHR13301:SF69 - X-BOX TRANSCRIPTION FACTOR-RELATED // BASIC HELIX-LOOP-HELIX DOMAIN-CONTAINING PROTEIN	yes|down
Glyma.03G187000.Wm82.a4.v1	(1 of 12) K13496 - UDP-glucosyl transferase 73C [EC:2.4.1.-] Glc - brassinosteroid (UGT73C)	yes|down
Glyma.10G003200.Wm82.a4.v1	(1 of 1) PTHR33428//PTHR33428:SF1 - FAMILY NOT NAMED // CHLOROPHYLLASE-2, CHLOROPLASTIC	yes|down
Glyma.15G118500.Wm82.a4.v1	(1 of 4) PTHR22814//PTHR22814:SF94 - COPPER TRANSPORT PROTEIN ATOX1-RELATED // SUBFAMILY NOT NAMED	yes|down
Glyma.13G333400.Wm82.a4.v1	(1 of 4) PTHR26374//PTHR26374:SF162 - FAMILY NOT NAMED // C2H2-TYPE ZINC FINGER FAMILY PROTEIN-RELATED	yes|up
Glyma.09G272100.Wm82.a4.v1	(1 of 224) KOG0472 - Leucine-rich repeat protein	yes|up
Glyma.09G094600.Wm82.a4.v1	(1 of 13) 2.1.1.150 - Isoflavone 7-O-methyltransferase	yes|up
Glyma.13G053800.Wm82.a4.v1	(1 of 35) PF07714//PF11721 - Protein tyrosine kinase (Pkinase_Tyr) // Di-glucose binding within endoplasmic reticulum (Malectin)	yes|up
Glyma.18G114900.Wm82.a4.v1	(1 of 4) PTHR31407:SF6 - OXYGEN-EVOLVING ENHANCER PROTEIN 2-1, CHLOROPLASTIC-RELATED	yes|down
Glyma.19G181800.Wm82.a4.v1	(1 of 4) PTHR33083//PTHR33083:SF10 - FAMILY NOT NAMED // ARABIDOPSIS THALIANA GENOMIC DNA, CHROMOSOME 5, P1 CLONE:MOK16	yes|down
Glyma.19G150900.Wm82.a4.v1	(1 of 9) PTHR21495//PTHR21495:SF71 - NUCLEOPORIN-RELATED // DIRIGENT PROTEIN 1-RELATED	yes|down
Glyma.19G138101.Wm82.a4.v1	(1 of 753) PF13041 - PPR repeat family (PPR_2)	yes|down
Glyma.18G271300.Wm82.a4.v1	(1 of 63) K04733 - interleukin-1 receptor-associated kinase 4 (IRAK4)	yes|up
Glyma.16G039600.Wm82.a4.v1	(1 of 22) K13065 - shikimate O-hydroxycinnamoyltransferase (E2.3.1.133, HCT)	yes|up
Glyma.18G260700.Wm82.a4.v1	(1 of 9) PTHR10891//PTHR10891:SF574 - EF-HAND CALCIUM-BINDING DOMAIN CONTAINING PROTEIN // CALCIUM-BINDING PROTEIN CML30-RELATED	yes|up
Glyma.01G027100.Wm82.a4.v1	(1 of 10) PF00069//PF01476 - Protein kinase domain (Pkinase) // LysM domain (LysM)	yes|up
Glyma.02G255400.Wm82.a4.v1	(1 of 4) PF07014//PF07231 - Hs1pro-1 protein C-terminus (Hs1pro-1_C) // Hs1pro-1 N-terminus (Hs1pro-1_N)	yes|up
Glyma.06G142300.Wm82.a4.v1	(1 of 2) PTHR26402//PTHR26402:SF521 - RESPONSE REGULATOR OF TWO-COMPONENT SYSTEM // TWO-COMPONENT RESPONSE REGULATOR ARR16-RELATED	yes|down
Glyma.11G172300.Wm82.a4.v1	(1 of 5) PTHR14155:SF135 - RING-H2 FINGER PROTEIN ATL63	yes|down
Glyma.18G021600.Wm82.a4.v1	(1 of 7) PTHR24347//PTHR24347:SF167 - SERINE/THREONINE-PROTEIN KINASE // CBL-INTERACTING SERINE/THREONINE-PROTEIN KINASE 2	yes|down
Glyma.05G142400.Wm82.a4.v1	(1 of 1) PF00083//PF06609 - Sugar (and other) transporter (Sugar_tr) // Fungal trichothecene efflux pump (TRI12) (TRI12)	yes|down
Glyma.19G047702.Wm82.a4.v1	(1 of 9) PTHR26402//PTHR26402:SF593 - RESPONSE REGULATOR OF TWO-COMPONENT SYSTEM // SUBFAMILY NOT NAMED	yes|down
Glyma.11G060200.Wm82.a4.v1	(1 of 7) PTHR24298//PTHR24298:SF172 - FAMILY NOT NAMED // CYTOCHROME P450 82C2-RELATED	yes|down
Glyma.11G208500.Wm82.a4.v1	(1 of 3) PTHR14445//PTHR14445:SF39 - GRB10 INTERACTING GYF PROTEIN // SWIB/MDM2, PLUS-3 AND GYF DOMAIN-CONTAINING PROTEIN-RELATED	yes|down
Glyma.05G050600.Wm82.a4.v1	(1 of 4) PTHR11850:SF74 - HOMEOBOX PROTEIN KNOTTED-1-LIKE 7	yes|down
Glyma.11G150400.Wm82.a4.v1	(1 of 6) PTHR21495//PTHR21495:SF59 - NUCLEOPORIN-RELATED // DIRIGENT PROTEIN 20-RELATED	yes|down
Glyma.17G007200.Wm82.a4.v1	(1 of 32) 1.14.13.121 - Premnaspirodiene oxygenase / Hyoscymus muticus premnaspirodiene oxygenase	yes|up
Glyma.08G050300.Wm82.a4.v1	(1 of 2) PTHR20961//PTHR20961:SF5 - GLYCOSYLTRANSFERASE // GENOMIC DNA, CHROMOSOME 3, P1 CLONE: MRC8	yes|up
Glyma.13G065300.Wm82.a4.v1		yes|up
Glyma.10G222100.Wm82.a4.v1		yes|down
Glyma.12G093100.Wm82.a4.v1	(1 of 4) PTHR10797:SF3 - CCR4-ASSOCIATED FACTOR 1 HOMOLOG 11-RELATED	yes|up
Glyma.09G038500.Wm82.a4.v1	(1 of 4) PTHR22595//PTHR22595:SF42 - CHITINASE-RELATED // CHITINASE-LIKE PROTEIN 1	yes|down
Glyma.01G229800.Wm82.a4.v1	(1 of 14) PTHR17130 - MITOCHONDRIAL OUTER MEMBRANE PROTEIN 25	yes|down
Glyma.13G069800.Wm82.a4.v1	(1 of 5) PTHR21493:SF148 - SENESCENCE-ASSOCIATED CARBOXYLESTERASE 101	yes|up
Glyma.04G003200.Wm82.a4.v1	(1 of 3) PTHR19139//PTHR19139:SF152 - AQUAPORIN TRANSPORTER // AQUAPORIN PIP2-7	yes|down
Glyma.19G128200.Wm82.a4.v1	(1 of 6) PTHR11802//PTHR11802:SF94 - SERINE PROTEASE FAMILY S10 SERINE CARBOXYPEPTIDASE // SUBFAMILY NOT NAMED	yes|down
Glyma.06G144000.Wm82.a4.v1	(1 of 2) PTHR33599//PTHR33599:SF4 - FAMILY NOT NAMED // GB|AAF01528.1	yes|up
Glyma.17G211300.Wm82.a4.v1		yes|up
Glyma.10G037001.Wm82.a4.v1	(1 of 3) PTHR10641//PTHR10641:SF523 - MYB-LIKE DNA-BINDING PROTEIN MYB // SUBFAMILY NOT NAMED	yes|down
Glyma.15G172600.Wm82.a4.v1	(1 of 4) PTHR24361//PTHR24361:SF385 - MITOGEN-ACTIVATED KINASE KINASE KINASE // MITOGEN-ACTIVATED PROTEIN KINASE KINASE 1-RELATED	yes|up
Glyma.20G138700.Wm82.a4.v1	(1 of 29) PTHR27002//PTHR27002:SF122 - FAMILY NOT NAMED // CYSTEINE-RICH RECEPTOR-LIKE PROTEIN KINASE 28-RELATED	yes|up
Glyma.15G152900.Wm82.a4.v1	(1 of 191) PF00168 - C2 domain (C2)	yes|up
Glyma.06G061900.Wm82.a4.v1	(1 of 8) PTHR31429:SF3 - WRKY TRANSCRIPTION FACTOR 40-RELATED	yes|up
Glyma.07G040000.Wm82.a4.v1	(1 of 2) PTHR34788:SF1 - F15I1.22	yes|up
Glyma.02G236300.Wm82.a4.v1		yes|up
Glyma.02G100300.Wm82.a4.v1	(1 of 73) 3.1.4.46 - Glycerophosphodiester phosphodiesterase / Glycerophosphoryl diester phosphodiesterase	yes|up
Glyma.14G003800.Wm82.a4.v1		yes|up
Glyma.02G205600.Wm82.a4.v1	(1 of 6) PTHR19375:SF229 - HEAT SHOCK 70 KDA PROTEIN 5	yes|down
Glyma.16G175200.Wm82.a4.v1	(1 of 10) 2.4.1.170 - Isoflavone 7-O-glucosyltransferase	yes|up
Glyma.12G218200.Wm82.a4.v1	(1 of 5) PTHR10641//PTHR10641:SF567 - MYB-LIKE DNA-BINDING PROTEIN MYB // SUBFAMILY NOT NAMED	yes|down
Glyma.14G004000.Wm82.a4.v1	(1 of 1) PTHR36343//PTHR36343:SF1 - FAMILY NOT NAMED // EXPRESSED PROTEIN	yes|down
Glyma.01G199800.Wm82.a4.v1	(1 of 1) 1.14.13.134 - Beta-amyrin 11-oxidase / CYP88D6	yes|up
Glyma.12G054200.Wm82.a4.v1	(1 of 38) K01188 - beta-glucosidase (E3.2.1.21)	yes|up
Glyma.06G167200.Wm82.a4.v1	(1 of 36) PTHR23155//PTHR23155:SF563 - LEUCINE-RICH REPEAT-CONTAINING PROTEIN // SUBFAMILY NOT NAMED	yes|down
Glyma.06G138300.Wm82.a4.v1	(1 of 131) PF00892 - EamA-like transporter family (EamA)	yes|down
Glyma.06G142000.Wm82.a4.v1	(1 of 176) PF03106 - WRKY DNA -binding domain (WRKY)	yes|up
Glyma.03G227600.Wm82.a4.v1	(1 of 12) PTHR21562:SF5 - PECTINACETYLESTERASE FAMILY PROTEIN	yes|down
Glyma.07G128000.Wm82.a4.v1	(1 of 4) PTHR11751//PTHR11751:SF418 - SUBGROUP I AMINOTRANSFERASE RELATED // 1-AMINOCYCLOPROPANE-1-CARBOXYLATE SYNTHASE 7	yes|up
Glyma.11G198300.Wm82.a4.v1	(1 of 3) 6.2.1.8 - Oxalate--CoA ligase / Oxalyl-CoA synthetase	yes|up
Glyma.06G017600.Wm82.a4.v1	(1 of 51) 2.7.10.2//2.7.11.1 - Non-specific protein-tyrosine kinase / Cytoplasmic protein tyrosine kinase // Non-specific serine/threonine protein kinase / Threonine-specific protein kinase	yes|up
Glyma.14G218100.Wm82.a4.v1	(1 of 21) K06966 - uncharacterized protein (K06966)	yes|up
Glyma.16G193800.Wm82.a4.v1	(1 of 17) PTHR33044//PTHR33044:SF21 - FAMILY NOT NAMED // PROTEIN YLS3	yes|up
Glyma.15G090500.Wm82.a4.v1		yes|up
Glyma.19G157000.Wm82.a4.v1	(1 of 3) K04120 - ent-copalyl diphosphate synthase (E5.5.1.13)	yes|up
Glyma.03G130600.Wm82.a4.v1	(1 of 3) PTHR13935:SF41 - ACHAETE-SCUTE HOMOLOG 3	yes|up
Glyma.13G041600.Wm82.a4.v1		yes|down
Glyma.06G033300.Wm82.a4.v1	(1 of 7) PTHR10593//PTHR10593:SF31 - SERINE/THREONINE-PROTEIN KINASE RIO // C2H2-LIKE ZINC FINGER PROTEIN-RELATED	yes|down
Glyma.13G294200.Wm82.a4.v1		yes|up
Glyma.05G053300.Wm82.a4.v1	(1 of 3) K14423 - 4,4-dimethyl-9beta,19-cyclopropylsterol-4alpha-methyl oxidase (SMO1)	yes|down
Glyma.14G078400.Wm82.a4.v1	(1 of 6) PTHR16092 - SEC3/SYNTAXIN-RELATED	yes|down
Glyma.16G178100.Wm82.a4.v1	(1 of 17) PTHR22814//PTHR22814:SF129 - COPPER TRANSPORT PROTEIN ATOX1-RELATED // COPPER TRANSPORT FAMILY PROTEIN-RELATED	yes|up
Glyma.03G125200.Wm82.a4.v1	(1 of 2) PTHR11802//PTHR11802:SF97 - SERINE PROTEASE FAMILY S10 SERINE CARBOXYPEPTIDASE // SUBFAMILY NOT NAMED	yes|down
Glyma.09G004800.Wm82.a4.v1	(1 of 17) PF14476 - Petal formation-expressed (Chloroplast_duf)	yes|up
Glyma.19G029700.Wm82.a4.v1	(1 of 6) PTHR11926//PTHR11926:SF400 - GLUCOSYL/GLUCURONOSYL TRANSFERASES // SUBFAMILY NOT NAMED	yes|up
Glyma.04G222100.Wm82.a4.v1	(1 of 7) PTHR31867:SF22 - EXPANSIN-A8	yes|down
Glyma.12G073000.Wm82.a4.v1	(1 of 2) PTHR24055:SF214 - MITOGEN-ACTIVATED PROTEIN KINASE 3	yes|up
Glyma.17G192000.Wm82.a4.v1	(1 of 4) PTHR22950//PTHR22950:SF278 - AMINO ACID TRANSPORTER // AMINO ACID PERMEASE 1-RELATED	yes|down
Glyma.04G010600.Wm82.a4.v1	(1 of 6) PTHR23324//PTHR23324:SF55 - SEC14 RELATED PROTEIN // PHOSPHATIDYLINOSITOL/PHOSPHATIDYLCHOLINE TRANSFER PROTEIN SFH10-RELATED	yes|up
Glyma.09G253900.Wm82.a4.v1	(1 of 1) 2.1.1.158//2.1.1.160 - 7-methylxanthosine synthase / XRS1 // Caffeine synthase / Dimethylxanthine methyltransferase	yes|up
Glyma.11G124700.Wm82.a4.v1		yes|up
Glyma.02G144400.Wm82.a4.v1	(1 of 4) PTHR10593//PTHR10593:SF20 - SERINE/THREONINE-PROTEIN KINASE RIO // INDETERMINATE-DOMAIN 12 PROTEIN	yes|down
Glyma.19G217700.Wm82.a4.v1	(1 of 1) 2.4.1.67 - Galactinol--raffinose galactosyltransferase / Stachyose synthetase	yes|down
Glyma.06G201100.Wm82.a4.v1	(1 of 13) PTHR12542//PTHR12542:SF29 - EXOCYST COMPLEX PROTEIN EXO70 // SUBFAMILY NOT NAMED	yes|up
Glyma.10G034200.Wm82.a4.v1	(1 of 26) PF04576 - Zein-binding (Zein-binding)	yes|down
Glyma.05G099300.Wm82.a4.v1		yes|up
Glyma.14G000700.Wm82.a4.v1		yes|down
Glyma.13G302500.Wm82.a4.v1	(1 of 137) PF02458 - Transferase family (Transferase)	yes|up
Glyma.09G072000.Wm82.a4.v1	(1 of 8) PTHR31985:SF34 - ETHYLENE-RESPONSIVE TRANSCRIPTION FACTOR ERF018	yes|up
Glyma.16G020100.Wm82.a4.v1	(1 of 8) 1.1.3.37//1.1.3.8 - D-arabinono-1,4-lactone oxidase / D-arabinono-gamma-lactone oxidase // L-gulonolactone oxidase / L-gulono-gamma-lactone oxidase	yes|down
Glyma.18G089800.Wm82.a4.v1	(1 of 3) K18848 - indole-3-acetate O-methyltransferase (IAMT1)	yes|down
Glyma.19G226500.Wm82.a4.v1	(1 of 1) PTHR31375:SF13 - PECTIN LYASE-LIKE PROTEIN	yes|down
Glyma.08G109500.Wm82.a4.v1	(1 of 20) 2.3.1.74 - Naringenin-chalcone synthase / Flavonone synthase	yes|up
Glyma.U031113.Wm82.a4.v1	(1 of 4) PTHR31062:SF11 - XYLOGLUCAN ENDOTRANSGLUCOSYLASE/HYDROLASE PROTEIN 9	yes|down
Glyma.10G205700.Wm82.a4.v1		yes|down
Glyma.18G253800.Wm82.a4.v1	(1 of 2) PTHR24326:SF269 - HOMEOBOX-LEUCINE ZIPPER PROTEIN ATHB-4	yes|down
Glyma.08G028800.Wm82.a4.v1	(1 of 3) K01047 - secretory phospholipase A2 (PLA2G, SPLA2)	yes|down
Glyma.13G226700.Wm82.a4.v1		yes|up
Glyma.14G062300.Wm82.a4.v1	(1 of 1) PTHR11709//PTHR11709:SF80 - MULTI-COPPER OXIDASE // SUBFAMILY NOT NAMED	yes|down
Glyma.12G048900.Wm82.a4.v1	(1 of 1) PTHR30560//PTHR30560:SF2 - TRIGGER FACTOR CHAPERONE AND PEPTIDYL-PROLYL CIS/TRANS ISOMERASE // SUBFAMILY NOT NAMED	yes|down
Glyma.13G218200.Wm82.a4.v1	(1 of 5) PTHR10209//PTHR10209:SF171 - OXIDOREDUCTASE, 2OG-FE II OXYGENASE FAMILY PROTEIN // GIBBERELLIN 2-BETA-DIOXYGENASE 2-RELATED	yes|up
Glyma.11G228300.Wm82.a4.v1	(1 of 4) PTHR22950//PTHR22950:SF260 - AMINO ACID TRANSPORTER // SUBFAMILY NOT NAMED	yes|down
Glyma.14G091500.Wm82.a4.v1	(1 of 6) PTHR10641//PTHR10641:SF603 - MYB-LIKE DNA-BINDING PROTEIN MYB // SUBFAMILY NOT NAMED	yes|up
Glyma.06G260100.Wm82.a4.v1	(1 of 25) PF00931//PF07725//PF13676 - NB-ARC domain (NB-ARC) // Leucine Rich Repeat (LRR_3) // TIR domain (TIR_2)	yes|up
Glyma.10G239000.Wm82.a4.v1	(1 of 4) PTHR11206:SF103 - MATE EFFLUX FAMILY PROTEIN	yes|up
Glyma.15G264200.Wm82.a4.v1	(1 of 8) PTHR22835//PTHR22835:SF262 - ZINC FINGER FYVE DOMAIN CONTAINING PROTEIN // GDSL ESTERASE/LIPASE 5-RELATED	yes|up
Glyma.06G112700.Wm82.a4.v1	(1 of 4) PTHR31964//PTHR31964:SF37 - FAMILY NOT NAMED // ADENINE NUCLEOTIDE ALPHA HYDROLASE-LIKE PROTEIN	yes|down
Glyma.01G020900.Wm82.a4.v1	(1 of 12) K00083 - cinnamyl-alcohol dehydrogenase (E1.1.1.195)	yes|down
Glyma.10G036200.Wm82.a4.v1	(1 of 6) PTHR31190//PTHR31190:SF26 - FAMILY NOT NAMED // ETHYLENE-RESPONSIVE TRANSCRIPTION FACTOR ERF096	yes|up
Glyma.04G040200.Wm82.a4.v1	(1 of 39) 2.3.1.133 - Shikimate O-hydroxycinnamoyltransferase	yes|up
Glyma.05G095400.Wm82.a4.v1	(1 of 5) PTHR11431//PTHR11431:SF44 - FERRITIN // SUBFAMILY NOT NAMED	yes|down
Glyma.18G081800.Wm82.a4.v1	(1 of 2) PTHR24106//PTHR24106:SF153 - FAMILY NOT NAMED // PROTEIN TORNADO 1	yes|down
Glyma.06G085100.Wm82.a4.v1	(1 of 5) PTHR10543//PTHR10543:SF30 - BETA-CAROTENE DIOXYGENASE // SUBFAMILY NOT NAMED	yes|up
Glyma.11G129600.Wm82.a4.v1	(1 of 38) K01188 - beta-glucosidase (E3.2.1.21)	yes|up
Glyma.02G143600.Wm82.a4.v1	(1 of 3) PTHR11730//PTHR11730:SF52 - AMMONIUM TRANSPORTER // SUBFAMILY NOT NAMED	yes|up
Glyma.09G027500.Wm82.a4.v1	(1 of 8) PTHR27005//PTHR27005:SF7 - FAMILY NOT NAMED // WALL-ASSOCIATED RECEPTOR KINASE-LIKE 1-RELATED	yes|up
Glyma.10G230000.Wm82.a4.v1	(1 of 5) K12795 - suppressor of G2 allele of SKP1 (SUGT1, SGT1)	yes|up
Glyma.13G032700.Wm82.a4.v1	(1 of 73) 3.1.4.46 - Glycerophosphodiester phosphodiesterase / Glycerophosphoryl diester phosphodiesterase	yes|up
Glyma.10G253800.Wm82.a4.v1	(1 of 29) PTHR27002//PTHR27002:SF122 - FAMILY NOT NAMED // CYSTEINE-RICH RECEPTOR-LIKE PROTEIN KINASE 28-RELATED	yes|up
Glyma.20G223600.Wm82.a4.v1	(1 of 4) PTHR13132//PTHR13132:SF29 - ALPHA- 1,6 -FUCOSYLTRANSFERASE // ALPHA-(1,6)-FUCOSYLTRANSFERASE	yes|down
Glyma.20G195100.Wm82.a4.v1	(1 of 1) PTHR22952//PTHR22952:SF172//PTHR22952:SF180 - CAMP-RESPONSE ELEMENT BINDING PROTEIN-RELATED // SUBFAMILY NOT NAMED // TRANSCRIPTION FACTOR TGA1-RELATED	yes|up
Glyma.07G243500.Wm82.a4.v1	(1 of 37) PF00407 - Pathogenesis-related protein Bet v I family (Bet_v_1)	yes|down
Glyma.06G191800.Wm82.a4.v1	(1 of 6) PTHR12565//PTHR12565:SF148 - STEROL REGULATORY ELEMENT-BINDING PROTEIN // PROTEIN BANQUO 3	yes|down
Glyma.03G197200.Wm82.a4.v1	(1 of 155) K14488 - SAUR family protein (SAUR)	yes|up
Glyma.15G176500.Wm82.a4.v1	(1 of 22) PF08879//PF08880 - WRC (WRC) // QLQ (QLQ)	yes|down
Glyma.19G188700.Wm82.a4.v1	(1 of 3) PTHR24012//PTHR24012:SF455 - FAMILY NOT NAMED // POLYADENYLATE-BINDING PROTEIN 7	yes|down
Glyma.02G183000.Wm82.a4.v1	(1 of 4) PTHR31375//PTHR31375:SF3 - FAMILY NOT NAMED // POLYGALACTURONASE ADPG1-RELATED	yes|up
Glyma.02G023800.Wm82.a4.v1	(1 of 36) PTHR11017//PTHR11017:SF162 - LEUCINE-RICH REPEAT-CONTAINING PROTEIN // SUBFAMILY NOT NAMED	yes|up
Glyma.12G165200.Wm82.a4.v1	(1 of 2) PTHR24056//PTHR24056:SF203 - CELL DIVISION PROTEIN KINASE // PROTEIN KINASE SUPERFAMILY PROTEIN	yes|down
Glyma.20G206500.Wm82.a4.v1	(1 of 2) PTHR23083//PTHR23083:SF444 - TETRATRICOPEPTIDE REPEAT PROTEIN, TPR // SUBFAMILY NOT NAMED	yes|down
Glyma.17G261300.Wm82.a4.v1		yes|up
Glyma.12G188500.Wm82.a4.v1	(1 of 13) PF13515 - Fusaric acid resistance protein-like (FUSC_2)	yes|up
Glyma.14G116400.Wm82.a4.v1		yes|up
Glyma.17G229500.Wm82.a4.v1	(1 of 3) PTHR23056:SF26 - CALCINEURIN B-LIKE PROTEIN 10	yes|up
Glyma.02G299800.Wm82.a4.v1		yes|down
Glyma.12G054100.Wm82.a4.v1	(1 of 38) K01188 - beta-glucosidase (E3.2.1.21)	yes|up
Glyma.11G002800.Wm82.a4.v1	(1 of 51) PF01657//PF07714 - Salt stress response/antifungal (Stress-antifung) // Protein tyrosine kinase (Pkinase_Tyr)	yes|up
Glyma.05G166800.Wm82.a4.v1	(1 of 2) PTHR17130//PTHR17130:SF24 - MITOCHONDRIAL OUTER MEMBRANE PROTEIN 25 // GAN	yes|down
Glyma.04G249700.Wm82.a4.v1	(1 of 3) K03542 - photosystem II 22kDa protein (psbS)	yes|down
Glyma.07G164900.Wm82.a4.v1		yes|down
Glyma.18G124200.Wm82.a4.v1	(1 of 8) PTHR32295//PTHR32295:SF14 - FAMILY NOT NAMED // PROTEIN IQ-DOMAIN 31-RELATED	yes|down
Glyma.19G128400.Wm82.a4.v1		yes|down
Glyma.07G151300.Wm82.a4.v1	(1 of 5) 1.14.99.33 - Delta(12)-fatty acid dehydrogenase / Linoleate Delta-12-fatty acid acetylenase (desaturase)	yes|up
Glyma.10G115850.Wm82.a4.v1		yes|up
Glyma.08G110460.Wm82.a4.v1	(1 of 20) 2.3.1.74 - Naringenin-chalcone synthase / Flavonone synthase	yes|up
Glyma.08G257300.Wm82.a4.v1	(1 of 349) PF00847 - AP2 domain (AP2)	yes|up
Glyma.01G204400.Wm82.a4.v1	(1 of 8) PTHR33077:SF13 - PROTEIN TIFY 10A-RELATED	yes|up
Glyma.17G176500.Wm82.a4.v1		yes|down
Glyma.08G022800.Wm82.a4.v1		yes|up
Glyma.03G042700.Wm82.a4.v1	(1 of 8) K13424 - WRKY transcription factor 33 (WRKY33)	yes|up
Glyma.07G044900.Wm82.a4.v1	(1 of 38) PF04570 - zinc-finger of the FCS-type, C2-C2 (zf-FLZ)	yes|up
Glyma.12G109700.Wm82.a4.v1	(1 of 2) PTHR12771//PTHR12771:SF17 - ENGULFMENT AND CELL MOTILITY // SUBFAMILY NOT NAMED	yes|down
Glyma.01G172100.Wm82.a4.v1		yes|up
Glyma.06G143300.Wm82.a4.v1	(1 of 7) PTHR31867:SF22 - EXPANSIN-A8	yes|down
Glyma.08G299700.Wm82.a4.v1	(1 of 2) PTHR11177//PTHR11177:SF175 - CHITINASE // SUBFAMILY NOT NAMED	yes|up
Glyma.20G111900.Wm82.a4.v1	(1 of 4) PTHR11785//PTHR11785:SF331 - AMINO ACID TRANSPORTER // SUBFAMILY NOT NAMED	yes|down
Glyma.02G146100.Wm82.a4.v1	(1 of 38) PF04570 - zinc-finger of the FCS-type, C2-C2 (zf-FLZ)	yes|down
Glyma.01G159200.Wm82.a4.v1	(1 of 2) PTHR32002:SF13 - PROTEIN RKD5	yes|down
Glyma.18G158600.Wm82.a4.v1		yes|up
Glyma.08G269900.Wm82.a4.v1		yes|down
Glyma.11G179100.Wm82.a4.v1	(1 of 3) PTHR31086//PTHR31086:SF22 - FAMILY NOT NAMED // ALUMINUM-ACTIVATED MALATE TRANSPORTER 1-RELATED	yes|up
Glyma.14G053600.Wm82.a4.v1	(1 of 4) PTHR31388:SF24 - PEROXIDASE 52	yes|down
Glyma.20G137400.Wm82.a4.v1	(1 of 11) PTHR27002//PTHR27002:SF51 - FAMILY NOT NAMED // CYSTEINE-RICH RECEPTOR-LIKE PROTEIN KINASE 25-RELATED	yes|up
Glyma.08G066200.Wm82.a4.v1	(1 of 25) PTHR27007//PTHR27007:SF24 - FAMILY NOT NAMED // L-TYPE LECTIN-DOMAIN CONTAINING RECEPTOR KINASE IX.1-RELATED	yes|up
Glyma.16G067000.Wm82.a4.v1	(1 of 6) PTHR31874:SF1 - CCT MOTIF FAMILY PROTEIN-RELATED	yes|down
Glyma.06G135900.Wm82.a4.v1		yes|up
Glyma.19G002900.Wm82.a4.v1	(1 of 4) PTHR31079:SF2 - F4P13.14 PROTEIN-RELATED	yes|down
Glyma.17G158800.Wm82.a4.v1	(1 of 6) PTHR27001//PTHR27001:SF52 - FAMILY NOT NAMED // PROTEIN KINASE FAMILY PROTEIN-RELATED	yes|up
Glyma.06G207751.Wm82.a4.v1	(1 of 8) PTHR12601//PTHR12601:SF6 - EUKARYOTIC TRANSLATION INITIATION FACTOR 3 SUBUNIT EIF-3 // CLUSTERED MITOCHONDRIA PROTEIN HOMOLOG	yes|up
Glyma.19G139300.Wm82.a4.v1	(1 of 3) K03403 - magnesium chelatase subunit H (chlH, bchH)	yes|down
Glyma.04G045200.Wm82.a4.v1	(1 of 273) PF00646 - F-box domain (F-box)	yes|up
Glyma.13G164800.Wm82.a4.v1	(1 of 4) PTHR31065//PTHR31065:SF11 - FAMILY NOT NAMED // PLATZ TRANSCRIPTION FACTOR FAMILY PROTEIN	yes|down
Glyma.03G236300.Wm82.a4.v1	(1 of 4) PTHR11972:SF57 - RESPIRATORY BURST OXIDASE HOMOLOG PROTEIN B	yes|up
Glyma.20G096700.Wm82.a4.v1	(1 of 4) PTHR23244//PTHR23244:SF294 - KELCH REPEAT DOMAIN // SUBFAMILY NOT NAMED	yes|down
Glyma.08G130800.Wm82.a4.v1	(1 of 6) PTHR10857:SF34 - COPINE (CALCIUM-DEPENDENT PHOSPHOLIPID-BINDING PROTEIN) FAMILY PROTEIN	yes|up
Glyma.19G263300.Wm82.a4.v1	(1 of 5) PTHR11771//PTHR11771:SF38 - LIPOXYGENASE // LIPOXYGENASE 3, CHLOROPLASTIC-RELATED	yes|up
Glyma.16G172600.Wm82.a4.v1	(1 of 5) K05666 - ATP-binding cassette, subfamily C (CFTR/MRP), member 2 (ABCC2)	yes|down
Glyma.14G061200.Wm82.a4.v1	(1 of 1) PTHR34795:SF1 - NEMATODE RESISTANCE PROTEIN-LIKE HSPRO1-RELATED	yes|up
Glyma.18G289900.Wm82.a4.v1	(1 of 82) PF04535 - Domain of unknown function (DUF588) (DUF588)	yes|up
Glyma.18G241000.Wm82.a4.v1	(1 of 2) PTHR31752//PTHR31752:SF2 - FAMILY NOT NAMED // AUXIN EFFLUX CARRIER COMPONENT 8-RELATED	yes|up
Glyma.18G117800.Wm82.a4.v1	(1 of 36) PTHR11017//PTHR11017:SF162 - LEUCINE-RICH REPEAT-CONTAINING PROTEIN // SUBFAMILY NOT NAMED	yes|down
Glyma.13G188800.Wm82.a4.v1	(1 of 10) PTHR27002//PTHR27002:SF95 - FAMILY NOT NAMED // G-TYPE LECTIN S-RECEPTOR-LIKE SERINE/THREONINE-PROTEIN KINASE B120	yes|up
Glyma.07G153900.Wm82.a4.v1	(1 of 562) PF00249 - Myb-like DNA-binding domain (Myb_DNA-binding)	yes|up
Glyma.14G208000.Wm82.a4.v1	(1 of 4) PTHR31852//PTHR31852:SF1 - FAMILY NOT NAMED // LATE EMBRYOGENESIS ABUNDANT (LEA) HYDROXYPROLINE-RICH GLYCOPROTEIN-RELATED	yes|up
Glyma.17G246000.Wm82.a4.v1	(1 of 2) PTHR31391//PTHR31391:SF17 - FAMILY NOT NAMED // B3 DOMAIN-CONTAINING PROTEIN REM16	yes|down
Glyma.01G030300.Wm82.a4.v1	(1 of 25) PF07816 - Protein of unknown function (DUF1645) (DUF1645)	yes|up
Glyma.10G062600.Wm82.a4.v1	(1 of 17) PTHR11926//PTHR11926:SF248 - GLUCOSYL/GLUCURONOSYL TRANSFERASES // UDP-GLYCOSYLTRANSFERASE 73C7	yes|up
Glyma.20G129900.Wm82.a4.v1	(1 of 8) PF04450 - Peptidase of plants and bacteria (BSP)	yes|up
Glyma.01G133600.Wm82.a4.v1		yes|up
Glyma.15G100400.Wm82.a4.v1	(1 of 7) PTHR14859 - CALCOFLUOR WHITE HYPERSENSITIVE PROTEIN PRECURSOR	yes|down
Glyma.13G249300.Wm82.a4.v1	(1 of 11) PTHR27002//PTHR27002:SF51 - FAMILY NOT NAMED // CYSTEINE-RICH RECEPTOR-LIKE PROTEIN KINASE 25-RELATED	yes|down
Glyma.10G147000.Wm82.a4.v1	(1 of 4) PTHR11850//PTHR11850:SF102 - HOMEOBOX PROTEIN TRANSCRIPTION FACTORS // SUBFAMILY NOT NAMED	yes|down
Glyma.20G118100.Wm82.a4.v1	(1 of 3) PTHR31042//PTHR31042:SF10 - FAMILY NOT NAMED // CORE-2/I-BRANCHING BETA-1,6-N-ACETYLGLUCOSAMINYLTRANSFERASE-LIKE PROTEIN	yes|up
Glyma.12G217700.Wm82.a4.v1	(1 of 6) PTHR23050//PTHR23050:SF170 - CALCIUM BINDING PROTEIN // SUBFAMILY NOT NAMED	yes|down
Glyma.02G284800.Wm82.a4.v1	(1 of 6) PTHR13683//PTHR13683:SF250 - ASPARTYL PROTEASES // ASPARTYL PROTEASE-LIKE PROTEIN	yes|up
Glyma.12G184800.Wm82.a4.v1		yes|down
Glyma.17G065000.Wm82.a4.v1	(1 of 9) PTHR31062//PTHR31062:SF32 - FAMILY NOT NAMED // XYLOGLUCAN ENDOTRANSGLUCOSYLASE/HYDROLASE PROTEIN 25-RELATED	yes|down
Glyma.19G063800.Wm82.a4.v1	(1 of 5) PF00069//PF07714//PF08263//PF13855 - Protein kinase domain (Pkinase) // Protein tyrosine kinase (Pkinase_Tyr) // Leucine rich repeat N-terminal domain (LRRNT_2) // Leucine rich repeat (LRR_8)	yes|down
Glyma.01G214200.Wm82.a4.v1	(1 of 2) K05277 - leucoanthocyanidin dioxygenase (E1.14.11.19)	yes|down
Glyma.12G096400.Wm82.a4.v1	(1 of 3) PTHR23024//PTHR23024:SF189 - MEMBER OF 'GDXG' FAMILY OF LIPOLYTIC ENZYMES // SUBFAMILY NOT NAMED	yes|up
Glyma.11G242100.Wm82.a4.v1		yes|up
Glyma.11G071100.Wm82.a4.v1		yes|up
Glyma.10G180500.Wm82.a4.v1	(1 of 12) PTHR13683//PTHR13683:SF268 - ASPARTYL PROTEASES // EUKARYOTIC ASPARTYL PROTEASE FAMILY PROTEIN	yes|up
Glyma.07G191100.Wm82.a4.v1	(1 of 8) 3.1.30.1 - Aspergillus nuclease S(1) / Single-stranded-nucleate endonuclease	yes|down
Glyma.02G256800.Wm82.a4.v1	(1 of 4) K09588 - cytochrome P450, family 90, subfamily A, polypeptide 1 (CYP90A1, CPD)	yes|down
Glyma.12G208900.Wm82.a4.v1	(1 of 2) PTHR33869:SF5 - CLAVATA3/ESR (CLE)-RELATED PROTEIN 3	yes|up
Glyma.03G041300.Wm82.a4.v1	(1 of 10) PF07107 - Wound-induced protein WI12 (WI12)	yes|up
Glyma.08G169800.Wm82.a4.v1	(1 of 1) PTHR23244//PTHR23244:SF276 - KELCH REPEAT DOMAIN // SUBFAMILY NOT NAMED	yes|up
Glyma.18G231500.Wm82.a4.v1	(1 of 14) PF00228 - Bowman-Birk serine protease inhibitor family (Bowman-Birk_leg)	yes|down
Glyma.08G053500.Wm82.a4.v1	(1 of 10) PTHR10891:SF573 - CALCIUM-BINDING PROTEIN CML24-RELATED	yes|up
Glyma.03G226800.Wm82.a4.v1	(1 of 14) 1.14.13.173 - 11-oxo-beta-amyrin 30-oxidase / CYP72A154	yes|down
Glyma.20G150600.Wm82.a4.v1	(1 of 2) PTHR14154//PTHR14154:SF5 - UPF0041 BRAIN PROTEIN 44-RELATED // EARLY LIGHT-INDUCED PROTEIN 1, CHLOROPLASTIC-RELATED	yes|down
Glyma.02G054900.Wm82.a4.v1		yes|up
Glyma.04G185100.Wm82.a4.v1	(1 of 6) PTHR11850//PTHR11850:SF101 - HOMEOBOX PROTEIN TRANSCRIPTION FACTORS // SUBFAMILY NOT NAMED	yes|down
Glyma.07G236100.Wm82.a4.v1	(1 of 4) PTHR10209//PTHR10209:SF160 - OXIDOREDUCTASE, 2OG-FE II OXYGENASE FAMILY PROTEIN // GIBBERELLIN 2-BETA-DIOXYGENASE 4	yes|up
Glyma.17G246500.Wm82.a4.v1	(1 of 3) 4.2.1.92 - Hydroperoxide dehydratase / Hydroperoxide isomerase	yes|up
Glyma.16G055900.Wm82.a4.v1	(1 of 2) PTHR31517//PTHR31517:SF7 - FAMILY NOT NAMED // PEROXIDASE 55	yes|up
Glyma.10G021700.Wm82.a4.v1	(1 of 2) PTHR35725:SF1 - CLASSICAL ARABINOGALACTAN PROTEIN 26	yes|down
Glyma.19G155900.Wm82.a4.v1		yes|down
Glyma.03G073778.Wm82.a4.v1	(1 of 10) PTHR11709:SF9 - LACCASE-7-RELATED	yes|up
Glyma.15G202300.Wm82.a4.v1	(1 of 2) PTHR11071//PTHR11071:SF286 - PEPTIDYL-PROLYL CIS-TRANS ISOMERASE // SUBFAMILY NOT NAMED	yes|down
Glyma.09G147200.Wm82.a4.v1	(1 of 4) PTHR31839//PTHR31839:SF8 - FAMILY NOT NAMED // DEHYDRATION-RESPONSIVE ELEMENT-BINDING PROTEIN 1A-RELATED	yes|up
Glyma.07G215500.Wm82.a4.v1	(1 of 3) 2.4.1.263 - Abscisate beta-glucosyltransferase / ABA-GTase	yes|up
Glyma.09G198000.Wm82.a4.v1	(1 of 25) PF14309//PF14383 - Domain of unknown function (DUF4378) (DUF4378) // DUF761-associated sequence motif (VARLMGL)	yes|down
Glyma.07G087400.Wm82.a4.v1	(1 of 9) K12355 - coniferyl-aldehyde dehydrogenase (REF1)	yes|up
Glyma.20G212900.Wm82.a4.v1	(1 of 4) K08916 - light-harvesting complex II chlorophyll a/b binding protein 5 (LHCB5)	yes|down
Glyma.08G017900.Wm82.a4.v1	(1 of 2) PTHR22814//PTHR22814:SF127 - COPPER TRANSPORT PROTEIN ATOX1-RELATED // SUBFAMILY NOT NAMED	yes|up
Glyma.05G150100.Wm82.a4.v1		yes|up
Glyma.09G188400.Wm82.a4.v1		yes|down
Glyma.09G130500.Wm82.a4.v1	(1 of 17) PTHR22814//PTHR22814:SF129 - COPPER TRANSPORT PROTEIN ATOX1-RELATED // COPPER TRANSPORT FAMILY PROTEIN-RELATED	yes|up
Glyma.20G149700.Wm82.a4.v1	(1 of 2) PTHR22763//PTHR22763:SF83 - RING ZINC FINGER PROTEIN // SUBFAMILY NOT NAMED	yes|down
Glyma.07G248600.Wm82.a4.v1	(1 of 191) PF00168 - C2 domain (C2)	yes|up
Glyma.02G128000.Wm82.a4.v1	(1 of 4) PTHR11570//PTHR11570:SF4 - S-ADENOSYLMETHIONINE DECARBOXYLASE // S-ADENOSYLMETHIONINE DECARBOXYLASE PROENZYME-RELATED	yes|down
Glyma.13G244000.Wm82.a4.v1		yes|down
Glyma.11G088000.Wm82.a4.v1	(1 of 7) 1.1.1.34 - Hydroxymethylglutaryl-CoA reductase (NADPH) / HMG-CoA reductase	yes|down
Glyma.14G201800.Wm82.a4.v1	(1 of 154) K00430 - peroxidase (E1.11.1.7)	yes|down
Glyma.09G140500.Wm82.a4.v1	(1 of 3) PTHR34067//PTHR34067:SF1 - FAMILY NOT NAMED // METHYL-CPG-BINDING DOMAIN-CONTAINING PROTEIN 13	yes|down
Glyma.04G076500.Wm82.a4.v1	(1 of 11) 2.4.1.168//2.4.2.39 - Xyloglucan 4-glucosyltransferase // Xyloglucan 6-xylosyltransferase / Xyloglucan 6-alpha-D-xylosyltransferase	yes|down
Glyma.14G206600.Wm82.a4.v1	(1 of 7) PTHR11562:SF45 - METAL TOLERANCE PROTEIN C3-RELATED	yes|up
Glyma.03G005400.Wm82.a4.v1	(1 of 10) PTHR11206//PTHR11206:SF102 - MULTIDRUG RESISTANCE PROTEIN // MATE EFFLUX FAMILY PROTEIN	yes|down
Glyma.07G176800.Wm82.a4.v1	(1 of 7) PTHR10209//PTHR10209:SF130 - OXIDOREDUCTASE, 2OG-FE II OXYGENASE FAMILY PROTEIN // SUBFAMILY NOT NAMED	yes|up
Glyma.17G096900.Wm82.a4.v1	(1 of 1) PTHR21319:SF17 - ZINC ION BINDING PROTEIN	yes|up
Glyma.09G062600.Wm82.a4.v1	(1 of 57) K08235 - xyloglucan:xyloglucosyl transferase (E2.4.1.207)	yes|up
Glyma.20G089100.Wm82.a4.v1	(1 of 4) PTHR31867:SF34 - EXPANSIN-A17-RELATED	yes|up
Glyma.08G200700.Wm82.a4.v1	(1 of 4) PTHR31734//PTHR31734:SF2 - FAMILY NOT NAMED // AUXIN-RESPONSIVE PROTEIN IAA18-RELATED	yes|up
Glyma.08G359100.Wm82.a4.v1	(1 of 6) PTHR11709//PTHR11709:SF66 - MULTI-COPPER OXIDASE // LACCASE-17	yes|down
Glyma.17G127600.Wm82.a4.v1		yes|up
Glyma.09G094400.Wm82.a4.v1	(1 of 13) 2.1.1.150 - Isoflavone 7-O-methyltransferase	yes|up
Glyma.10G290500.Wm82.a4.v1		yes|up
Glyma.11G141300.Wm82.a4.v1	(1 of 2) PTHR10366//PTHR10366:SF473 - NAD DEPENDENT EPIMERASE/DEHYDRATASE // SUBFAMILY NOT NAMED	yes|down
Glyma.17G105300.Wm82.a4.v1		yes|up
Glyma.13G340800.Wm82.a4.v1	(1 of 17) PTHR10593//PTHR10593:SF27 - SERINE/THREONINE-PROTEIN KINASE RIO // SUBFAMILY NOT NAMED	yes|down
Glyma.12G054400.Wm82.a4.v1	(1 of 38) K01188 - beta-glucosidase (E3.2.1.21)	yes|down
Glyma.06G294400.Wm82.a4.v1	(1 of 49) PF12796//PF13962 - Ankyrin repeats (3 copies) (Ank_2) // Domain of unknown function (PGG)	yes|up
Glyma.13G028100.Wm82.a4.v1	(1 of 36) PTHR11017//PTHR11017:SF162 - LEUCINE-RICH REPEAT-CONTAINING PROTEIN // SUBFAMILY NOT NAMED	yes|up
Glyma.11G048300.Wm82.a4.v1	(1 of 28) K01537 - Ca2+-transporting ATPase (E3.6.3.8)	yes|up
Glyma.16G119500.Wm82.a4.v1	(1 of 60) PF03087 - Arabidopsis protein of unknown function (DUF241)	yes|up
Glyma.11G218900.Wm82.a4.v1	(1 of 51) 2.7.10.2//2.7.11.1 - Non-specific protein-tyrosine kinase / Cytoplasmic protein tyrosine kinase // Non-specific serine/threonine protein kinase / Threonine-specific protein kinase	yes|up
Glyma.13G219100.Wm82.a4.v1	(1 of 7) PTHR33077:SF17 - PROTEIN TIFY 5A-RELATED	yes|up
Glyma.16G132800.Wm82.a4.v1	(1 of 6) PTHR31388:SF3 - PEROXIDASE 36-RELATED	yes|down
Glyma.08G347032.Wm82.a4.v1	(1 of 4) KOG0058 - Peptide exporter, ABC superfamily	yes|down
Glyma.10G245800.Wm82.a4.v1	(1 of 36) PTHR32077//PTHR32077:SF7 - FAMILY NOT NAMED // FASCICLIN-LIKE ARABINOGALACTAN PROTEIN 11	yes|down
Glyma.02G035200.Wm82.a4.v1	(1 of 25) PF07816 - Protein of unknown function (DUF1645) (DUF1645)	yes|up
Glyma.16G178000.Wm82.a4.v1	(1 of 17) PTHR22814//PTHR22814:SF129 - COPPER TRANSPORT PROTEIN ATOX1-RELATED // COPPER TRANSPORT FAMILY PROTEIN-RELATED	yes|up
Glyma.03G003100.Wm82.a4.v1	(1 of 25) PF00069//PF00954//PF01453 - Protein kinase domain (Pkinase) // S-locus glycoprotein domain (S_locus_glycop) // D-mannose binding lectin (B_lectin)	yes|up
Glyma.16G214200.Wm82.a4.v1	(1 of 2) PF00931//PF04450//PF13676 - NB-ARC domain (NB-ARC) // Peptidase of plants and bacteria (BSP) // TIR domain (TIR_2)	yes|up
Glyma.12G240100.Wm82.a4.v1	(1 of 36) PTHR11017//PTHR11017:SF162 - LEUCINE-RICH REPEAT-CONTAINING PROTEIN // SUBFAMILY NOT NAMED	yes|up
Glyma.02G207200.Wm82.a4.v1	(1 of 2) PTHR18934:SF131 - RNA HELICASE, PUTATIVE-RELATED	yes|down
Glyma.15G102100.Wm82.a4.v1	(1 of 6) PTHR12277:SF58 - ALPHA/BETA-HYDROLASES SUPERFAMILY PROTEIN	yes|down
Glyma.11G231300.Wm82.a4.v1	(1 of 6) PTHR12565//PTHR12565:SF181 - STEROL REGULATORY ELEMENT-BINDING PROTEIN // SUBFAMILY NOT NAMED	yes|down
Glyma.02G044600.Wm82.a4.v1	(1 of 2227) 2.7.11.1 - Non-specific serine/threonine protein kinase / Threonine-specific protein kinase	yes|up
Glyma.11G181200.Wm82.a4.v1		yes|up
Glyma.15G160700.Wm82.a4.v1	(1 of 49) PF12796//PF13962 - Ankyrin repeats (3 copies) (Ank_2) // Domain of unknown function (PGG)	yes|up
Glyma.02G005200.Wm82.a4.v1	(1 of 1) PTHR11732:SF255 - ARYL-ALCOHOL DEHYDROGENASE YPL088W-RELATED	yes|down
Glyma.13G298400.Wm82.a4.v1	(1 of 8) PTHR10992//PTHR10992:SF869 - ALPHA/BETA HYDROLASE FOLD-CONTAINING PROTEIN // SUBFAMILY NOT NAMED	yes|up
Glyma.11G003100.Wm82.a4.v1		yes|down
Glyma.10G136300.Wm82.a4.v1	(1 of 1) PTHR35709//PTHR35709:SF1 - FAMILY NOT NAMED // PROTEIN PROTON GRADIENT REGULATION 5, CHLOROPLASTIC	yes|down
Glyma.09G238200.Wm82.a4.v1	(1 of 2) PTHR19139//PTHR19139:SF142 - AQUAPORIN TRANSPORTER // SUBFAMILY NOT NAMED	yes|up
Glyma.19G058900.Wm82.a4.v1	(1 of 21) PTHR31238//PTHR31238:SF42 - FAMILY NOT NAMED // GERMIN-LIKE PROTEIN SUBFAMILY 1 MEMBER 10-RELATED	yes|up
Glyma.15G132800.Wm82.a4.v1	(1 of 11) PTHR32448:SF34 - F22M8.11 PROTEIN-RELATED	yes|up
Glyma.06G159600.Wm82.a4.v1	(1 of 2) PTHR10972//PTHR10972:SF100//PTHR10972:SF67 - OXYSTEROL-BINDING PROTEIN-RELATED // OXYSTEROL-BINDING PROTEIN HOMOLOG 3 // OXYSTEROL-BINDING PROTEIN-RELATED PROTEIN 1D	yes|down
Glyma.06G125600.Wm82.a4.v1	(1 of 176) PF03106 - WRKY DNA -binding domain (WRKY)	yes|up
Glyma.12G089300.Wm82.a4.v1	(1 of 4) PTHR32227:SF70 - GLUCAN ENDO-1,3-BETA-GLUCOSIDASE 14	yes|down
Glyma.07G099800.Wm82.a4.v1	(1 of 131) PF00892 - EamA-like transporter family (EamA)	yes|up
Glyma.13G267600.Wm82.a4.v1	(1 of 176) PF03106 - WRKY DNA -binding domain (WRKY)	yes|up
Glyma.20G237200.Wm82.a4.v1	(1 of 4) PTHR33565//PTHR33565:SF1 - FAMILY NOT NAMED // DORMANCY/AUXIN ASSOCIATED PROTEIN	yes|down
Glyma.U031513.Wm82.a4.v1	(1 of 7) PTHR31235:SF39 - PEROXIDASE 3-RELATED	yes|up
Glyma.03G130400.Wm82.a4.v1	(1 of 3) PTHR13935:SF41 - ACHAETE-SCUTE HOMOLOG 3	yes|up
Glyma.14G012800.Wm82.a4.v1	(1 of 2) PTHR13301//PTHR13301:SF57 - X-BOX TRANSCRIPTION FACTOR-RELATED // SUBFAMILY NOT NAMED	yes|up
Glyma.11G194100.Wm82.a4.v1	(1 of 2) PTHR10641//PTHR10641:SF506 - MYB-LIKE DNA-BINDING PROTEIN MYB // SUBFAMILY NOT NAMED	yes|down
Glyma.10G184600.Wm82.a4.v1	(1 of 8) PF00280 - Potato inhibitor I family (potato_inhibit)	yes|up
Glyma.13G122500.Wm82.a4.v1	(1 of 6) PTHR31190//PTHR31190:SF26 - FAMILY NOT NAMED // ETHYLENE-RESPONSIVE TRANSCRIPTION FACTOR ERF096	yes|up
Glyma.13G150300.Wm82.a4.v1	(1 of 42) PF01535//PF12854//PF13041 - PPR repeat (PPR) // PPR repeat (PPR_1) // PPR repeat family (PPR_2)	yes|down
Glyma.11G030000.Wm82.a4.v1	(1 of 78) PF00069//PF00560//PF08263//PF13855 - Protein kinase domain (Pkinase) // Leucine Rich Repeat (LRR_1) // Leucine rich repeat N-terminal domain (LRRNT_2) // Leucine rich repeat (LRR_8)	yes|down
Glyma.09G070500.Wm82.a4.v1	(1 of 2) PTHR10426//PTHR10426:SF35 - STRICTOSIDINE SYNTHASE-RELATED // SUBFAMILY NOT NAMED	yes|down
Glyma.13G275300.Wm82.a4.v1		yes|down
Glyma.13G086900.Wm82.a4.v1		yes|up
Glyma.18G029000.Wm82.a4.v1	(1 of 4) PTHR22950//PTHR22950:SF260 - AMINO ACID TRANSPORTER // SUBFAMILY NOT NAMED	yes|down
Glyma.07G086400.Wm82.a4.v1	(1 of 3) PTHR10015//PTHR10015:SF187 - HEAT SHOCK TRANSCRIPTION FACTOR // HEAT STRESS TRANSCRIPTION FACTOR C-1	yes|down
Glyma.10G205400.Wm82.a4.v1		yes|down
Glyma.03G001500.Wm82.a4.v1	(1 of 4) PTHR31284:SF9 - HAD SUPERFAMILY, SUBFAMILY IIIB ACID PHOSPHATASE	yes|up
Glyma.06G175100.Wm82.a4.v1	(1 of 2) PTHR27000//PTHR27000:SF9 - FAMILY NOT NAMED // LEUCINE-RICH REPEAT RECEPTOR-LIKE SERINE/THREONINE/TYROSINE-PROTEIN KINASE SOBIR1	yes|up
Glyma.09G236800.Wm82.a4.v1	(1 of 9) PTHR10891//PTHR10891:SF574 - EF-HAND CALCIUM-BINDING DOMAIN CONTAINING PROTEIN // CALCIUM-BINDING PROTEIN CML30-RELATED	yes|up
Glyma.19G120000.Wm82.a4.v1	(1 of 2) PTHR22835//PTHR22835:SF117 - ZINC FINGER FYVE DOMAIN CONTAINING PROTEIN // ALPHA-L-FUCOSIDASE 3	yes|up
Glyma.08G035000.Wm82.a4.v1	(1 of 70) K09286 - EREBP-like factor (EREBP)	yes|down
Glyma.07G154100.Wm82.a4.v1	(1 of 51) PF00069//PF00139 - Protein kinase domain (Pkinase) // Legume lectin domain (Lectin_legB)	yes|up
Glyma.02G120300.Wm82.a4.v1	(1 of 2) PTHR10584//PTHR10584:SF155 - SUGAR KINASE // FRUCTOKINASE-LIKE 2	yes|down
Glyma.10G129500.Wm82.a4.v1		yes|up
Glyma.07G223200.Wm82.a4.v1	(1 of 2) PTHR11040:SF48 - ZINC TRANSPORTER 10-RELATED	yes|up
Glyma.11G053200.Wm82.a4.v1	(1 of 4) PTHR31444//PTHR31444:SF8 - FAMILY NOT NAMED // PROTEIN IRREGULAR XYLEM 15-RELATED	yes|down
Glyma.20G192800.Wm82.a4.v1	(1 of 3) 1.10.3.2//1.10.3.3 - Laccase / Urishiol oxidase // L-ascorbate oxidase / Ascorbase	yes|down
Glyma.11G203200.Wm82.a4.v1		yes|up
Glyma.17G062300.Wm82.a4.v1	(1 of 2227) 2.7.11.1 - Non-specific serine/threonine protein kinase / Threonine-specific protein kinase	yes|up
Glyma.16G173400.Wm82.a4.v1	(1 of 4) PTHR34576:SF3 - MEMBRANE-ASSOCIATED KINASE REGULATOR 6-RELATED	yes|up
Glyma.05G236400.Wm82.a4.v1	(1 of 2) PTHR22298//PTHR22298:SF28 - ENDO-1,4-BETA-GLUCANASE // ENDOGLUCANASE 4-RELATED	yes|down
Glyma.10G186700.Wm82.a4.v1		yes|down
Glyma.09G119900.Wm82.a4.v1		yes|up
Glyma.15G223800.Wm82.a4.v1	(1 of 3) PTHR31707//PTHR31707:SF48 - FAMILY NOT NAMED // PECTINESTERASE/PECTINESTERASE INHIBITOR 24-RELATED	yes|up
Glyma.16G069700.Wm82.a4.v1	(1 of 12) PTHR31087:SF11 - PROTEIN LURP-ONE-RELATED 1-RELATED	yes|up
Glyma.18G271233.Wm82.a4.v1	(1 of 48) PF12819 - Carbohydrate-binding protein of the ER (Malectin_like)	yes|up
Glyma.11G169800.Wm82.a4.v1	(1 of 5) PTHR31342:SF9 - F10K1.18 PROTEIN	yes|down
Glyma.03G204900.Wm82.a4.v1	(1 of 74) PF05678 - VQ motif (VQ)	yes|up
Glyma.03G041000.Wm82.a4.v1	(1 of 12) PTHR31087:SF11 - PROTEIN LURP-ONE-RELATED 1-RELATED	yes|up
Glyma.05G226100.Wm82.a4.v1	(1 of 4) PTHR32295//PTHR32295:SF22 - FAMILY NOT NAMED // PROTEIN IQ-DOMAIN 25	yes|down
Glyma.07G035067.Wm82.a4.v1	(1 of 3) PTHR11533//PTHR11533:SF177 - PROTEASE M1 ZINC METALLOPROTEASE // SUBFAMILY NOT NAMED	yes|up
Glyma.12G145300.Wm82.a4.v1	(1 of 27) PTHR27002//PTHR27002:SF9 - FAMILY NOT NAMED // CYSTEINE-RICH RECEPTOR-LIKE PROTEIN KINASE 27-RELATED	yes|up
Glyma.18G181800.Wm82.a4.v1	(1 of 4) PTHR22936:SF38 - RHOMBOID-LIKE PROTEIN 4	yes|up
Glyma.17G068300.Wm82.a4.v1	(1 of 2) PTHR14155:SF80 - RING-H2 FINGER PROTEIN ATL13-RELATED	yes|down
Glyma.08G138300.Wm82.a4.v1	(1 of 5) PTHR10551//PTHR10551:SF13 - FASCIN // SUBFAMILY NOT NAMED	yes|down
Glyma.06G020800.Wm82.a4.v1		yes|up
Glyma.07G076400.Wm82.a4.v1	(1 of 17) PTHR32246:SF20 - BON1-ASSOCIATED PROTEIN 1-RELATED	yes|up
Glyma.01G166100.Wm82.a4.v1	(1 of 4) PTHR24349:SF87 - CALCIUM-DEPENDENT PROTEIN KINASE 16-RELATED	yes|up
Glyma.01G081600.Wm82.a4.v1	(1 of 2) PTHR11654//PTHR11654:SF178 - OLIGOPEPTIDE TRANSPORTER-RELATED // PROTEIN NRT1/ PTR FAMILY 3.1	yes|down
Glyma.04G136200.Wm82.a4.v1	(1 of 7) PTHR10891//PTHR10891:SF590 - EF-HAND CALCIUM-BINDING DOMAIN CONTAINING PROTEIN // SUBFAMILY NOT NAMED	yes|up
Glyma.19G196400.Wm82.a4.v1	(1 of 87) PF12937 - F-box-like (F-box-like)	yes|up
Glyma.02G080000.Wm82.a4.v1		yes|down
Glyma.14G041600.Wm82.a4.v1	(1 of 2) PTHR27000//PTHR27000:SF8 - FAMILY NOT NAMED // LEUCINE-RICH REPEAT PROTEIN KINASE-LIKE PROTEIN	yes|down
Glyma.13G186500.Wm82.a4.v1	(1 of 9) KOG2615 - Permease of the major facilitator superfamily	yes|down
Glyma.02G034051.Wm82.a4.v1		yes|up
Glyma.11G021500.Wm82.a4.v1	(1 of 3) PTHR11751//PTHR11751:SF380 - SUBGROUP I AMINOTRANSFERASE RELATED // 1-AMINOCYCLOPROPANE-1-CARBOXYLATE SYNTHASE 2-RELATED	yes|up
Glyma.13G035800.Wm82.a4.v1	(1 of 6) PF00069//PF07645//PF13947 - Protein kinase domain (Pkinase) // Calcium-binding EGF domain (EGF_CA) // Wall-associated receptor kinase galacturonan-binding (GUB_WAK_bind)	yes|up
Glyma.08G297500.Wm82.a4.v1	(1 of 8) PTHR32295//PTHR32295:SF14 - FAMILY NOT NAMED // PROTEIN IQ-DOMAIN 31-RELATED	yes|down
[truncated: 664 more rows]
