# Supplementary material for: GmWRKY33a is a hub gene responsive to brassinosteroid signaling that suppresses nodulation in soybean (Glycine max)
Source: Front Plant Sci. 2025 Jan 16;15:1507307. doi: 10.3389/fpls.2024.1507307 (PMC11779726; doi:10.3389/fpls.2024.1507307)
Supplement: Supplementary file 11 [file Table4.xlsx]

## Sheet: Sheet1
Supplement table 4
Gene_id	Gene description	Log2FC(BRHH24/BRmo24)	Pvalue
Glyma.18G029900.Wm82.a4.v1	(1 of 39) 2.3.1.133 - Shikimate O-hydroxycinnamoyltransferase	-1.32939	0.00594906
Glyma.13G319600.Wm82.a4.v1	(1 of 3) PTHR32044//PTHR32044:SF17 - FAMILY NOT NAMED // GLUCOMANNAN 4-BETA-MANNOSYLTRANSFERASE 2	-1.34549	4.09448e-21
Glyma.13G199500.Wm82.a4.v1	(1 of 11) PTHR10502//PTHR10502:SF113 - ANNEXIN // SUBFAMILY NOT NAMED	-1.0528	1.45855e-22
Glyma.16G150300.Wm82.a4.v1	(1 of 6) PTHR31062//PTHR31062:SF15 - FAMILY NOT NAMED // XYLOGLUCAN ENDOTRANSGLUCOSYLASE/HYDROLASE PROTEIN 4-RELATED	-1.55761	1.6929e-32
Glyma.12G172700.Wm82.a4.v1	(1 of 63) K04733 - interleukin-1 receptor-associated kinase 4 (IRAK4)	-3.45706	0.00809439
Glyma.05G051400.Wm82.a4.v1	(1 of 5) PTHR10795//PTHR10795:SF369 - PROPROTEIN CONVERTASE SUBTILISIN/KEXIN // SUBFAMILY NOT NAMED	-2.71715	7.09642e-05
Glyma.05G244200.Wm82.a4.v1	(1 of 4) PTHR34056//PTHR34056:SF1 - FAMILY NOT NAMED // GENOMIC DNA, CHROMOSOME 3, P1 CLONE: MRC8	-1.09769	1.9779e-05
Glyma.19G161700.Wm82.a4.v1	(1 of 2) PTHR10825//PTHR10825:SF28 - RING FINGER DOMAIN-CONTAINING, POLYCOMB GROUP COMPONENT // SUBFAMILY NOT NAMED	-1.29933	0.000206466
Glyma.13G093600.Wm82.a4.v1	(1 of 6) KOG1187//KOG2345 - Serine/threonine protein kinase // Serine/threonine protein kinase/TGF-beta stimulated factor	-5.90484	2.62068e-06
Glyma.20G191200.Wm82.a4.v1	(1 of 5) PTHR22924//PTHR22924:SF39 - LEGHEMOGLOBIN-RELATED // NON-SYMBIOTIC HEMOGLOBIN 2	-11.7988	1.56766e-23
Glyma.17G124600.Wm82.a4.v1	(1 of 30) PF05910 - Plant protein of unknown function (DUF868) (DUF868)	-1.23407	5.48041e-05
Glyma.07G015600.Wm82.a4.v1	(1 of 7) PTHR28242//PTHR28242:SF4 - FAMILY NOT NAMED // HISTIDINE-CONTAINING PHOSPHOTRANSFER PROTEIN 4	-1.64972	1.2441e-06
Glyma.18G043200.Wm82.a4.v1	(1 of 13) PTHR14326 - TARGETING PROTEIN FOR XKLP2	-1.19093	2.53072e-25
Glyma.01G050100.Wm82.a4.v1	(1 of 74) PF01357//PF03330 - Pollen allergen (Pollen_allerg_1) // Rare lipoprotein A (RlpA)-like double-psi beta-barrel (DPBB_1)	-1.06495	9.07388e-19
Glyma.05G178700.Wm82.a4.v1	(1 of 3) PTHR10502:SF98 - ANNEXIN D1-RELATED	-1.10592	6.35399e-21
Glyma.03G139300.Wm82.a4.v1	(1 of 1) PF03016//PF07974 - Exostosin family (Exostosin) // EGF-like domain (EGF_2)	-9.45543	2.02267e-15
Glyma.12G219000.Wm82.a4.v1	(1 of 3) PTHR10217:SF476 - CYCLIC NUCLEOTIDE-GATED ION CHANNEL 4	-2.01266	2.02855e-12
Glyma.11G077900.Wm82.a4.v1	(1 of 8) PTHR12231:SF112 - RHODANESE-LIKE DOMAIN-CONTAINING PROTEIN 14, CHLOROPLASTIC	-2.603	0.00366065
Glyma.20G206500.Wm82.a4.v1	(1 of 2) PTHR23083//PTHR23083:SF444 - TETRATRICOPEPTIDE REPEAT PROTEIN, TPR // SUBFAMILY NOT NAMED	-2.08611	9.31819e-10
Glyma.05G121600.Wm82.a4.v1	(1 of 10) PTHR31851:SF6 - VACUOLAR IRON TRANSPORTER HOMOLOG 2.1	-8.90737	9.22721e-14
Glyma.17G015100.Wm82.a4.v1	-	-1.10033	1.40297e-07
Glyma.03G137000.Wm82.a4.v1	(1 of 3) K03403 - magnesium chelatase subunit H (chlH, bchH)	-1.17241	1.68904e-13
Glyma.19G106700.Wm82.a4.v1	(1 of 6) PTHR31062//PTHR31062:SF15 - FAMILY NOT NAMED // XYLOGLUCAN ENDOTRANSGLUCOSYLASE/HYDROLASE PROTEIN 4-RELATED	-2.54322	4.90242e-88
Glyma.19G106800.Wm82.a4.v1	(1 of 4) 1.2.1.12//1.2.1.13 - Glyceraldehyde-3-phosphate dehydrogenase (phosphorylating) / Triosephosphate dehydrogenase // Glyceraldehyde-3-phosphate dehydrogenase (NADP(+)) (phosphorylating) / Triosephosphate dehydrogenase (NADP+)	-1.86465	7.0224e-13
Glyma.19G018700.Wm82.a4.v1	(1 of 1) PTHR23070//PTHR23070:SF19 - BCS1 AAA-TYPE ATPASE // SUBFAMILY NOT NAMED	-1.00087	3.07121e-06
Glyma.12G083500.Wm82.a4.v1	(1 of 5) PTHR22891//PTHR22891:SF40 - EUKARYOTIC TRANSLATION INITIATION FACTOR 2C // PROTEIN ARGONAUTE 5	-2.43047	1.77414e-23
Glyma.08G360400.Wm82.a4.v1	(1 of 2) PF03083//PF04193 - Sugar efflux transporter for intercellular exchange (MtN3_slv) // PQ loop repeat (PQ-loop)	-1.55182	0.00657664
Glyma.10G086800.Wm82.a4.v1	(1 of 4) PTHR19241//PTHR19241:SF286 - ATP-BINDING CASSETTE TRANSPORTER // SUBFAMILY NOT NAMED	-1.99059	2.50573e-09
Glyma.15G102000.Wm82.a4.v1	(1 of 3) PTHR20852//PTHR20852:SF53 - GLUTAMINE SYNTHETASE // GLUTAMINE SYNTHETASE, CHLOROPLASTIC/MITOCHONDRIAL	-1.17089	3.65859e-13
Glyma.02G132700.Wm82.a4.v1	(1 of 4) PF08553 - VID27 cytoplasmic protein (VID27)	-8.59195	6.1117e-17
Glyma.12G237433.Wm82.a4.v1	(1 of 6) PTHR11206:SF156 - MATE EFFLUX FAMILY PROTEIN FRD3	-7.17058	7.63969e-09
Glyma.12G189300.Wm82.a4.v1	(1 of 4) PTHR33155//PTHR33155:SF3 - FAMILY NOT NAMED // PROTEIN FAF-LIKE, CHLOROPLASTIC-RELATED	-1.44782	3.5369e-07
Glyma.10G135600.Wm82.a4.v1	(1 of 273) PF00646 - F-box domain (F-box)	-4.35906	6.52518e-11
Glyma.20G100500.Wm82.a4.v1	(1 of 1) 2.7.11.1//3.5.1.98 - Non-specific serine/threonine protein kinase / Threonine-specific protein kinase // Histone deacetylase / HDAC	-1.01944	1.51599e-29
Glyma.11G224266.Wm82.a4.v1	(1 of 5) PF00854//PF07690 - POT family (PTR2) // Major Facilitator Superfamily (MFS_1)	-1.10212	5.99468e-05
Glyma.17G054500.Wm82.a4.v1	(1 of 7) PTHR13878//PTHR13878:SF14 - GULONOLACTONE OXIDASE // SUBFAMILY NOT NAMED	-3.20491	5.3104e-38
Glyma.10G202300.Wm82.a4.v1	(1 of 47) KOG4282 - Transcription factor GT-2 and related proteins, contains trihelix DNA-binding/SANT domain	-2.93353	0.000183188
Glyma.08G294900.Wm82.a4.v1	(1 of 20) PF01535//PF13041//PF13812//PF14432 - PPR repeat (PPR) // PPR repeat family (PPR_2) // Pentatricopeptide repeat domain (PPR_3) // DYW family of nucleic acid deaminases (DYW_deaminase)	-3.34605	0.000201786
Glyma.08G097300.Wm82.a4.v1	(1 of 7) K11517 - (S)-2-hydroxy-acid oxidase (HAO)	-1.21859	3.19887e-35
Glyma.15G140200.Wm82.a4.v1	(1 of 3) PTHR23118:SF6 - ATP-CITRATE SYNTHASE BETA CHAIN PROTEIN 1	-1.02426	3.98067e-06
Glyma.10G202400.Wm82.a4.v1	(1 of 3) K00517 - E1.14.-.-	-4.67291	0.00448372
Glyma.18G111000.Wm82.a4.v1	(1 of 4) PTHR10209:SF96 - 1-AMINOCYCLOPROPANE-1-CARBOXYLATE OXIDASE-LIKE PROTEIN-RELATED	-1.62138	7.75425e-06
Glyma.13G182800.Wm82.a4.v1	(1 of 30) PF06749 - Protein of unknown function (DUF1218) (DUF1218)	-3.03522	8.79442e-07
Glyma.14G084600.Wm82.a4.v1	(1 of 4) PTHR24326//PTHR24326:SF263 - FAMILY NOT NAMED // WUSCHEL-RELATED HOMEOBOX 4	-1.30311	1.20325e-17
Glyma.12G069301.Wm82.a4.v1	-	-1.1472	3.09831e-29
Glyma.10G012900.Wm82.a4.v1	(1 of 4) PTHR33921//PTHR33921:SF2 - FAMILY NOT NAMED // CALVIN CYCLE PROTEIN CP12-1, CHLOROPLASTIC-RELATED	-2.1324	2.77143e-07
Glyma.11G104100.Wm82.a4.v1	(1 of 2) PF11267 - Domain of unknown function (DUF3067) (DUF3067)	-1.15918	0.000796776
Glyma.04G063800.Wm82.a4.v1	(1 of 4) PTHR13301//PTHR13301:SF31 - X-BOX TRANSCRIPTION FACTOR-RELATED // CELLULOSE SYNTHASE A CATALYTIC SUBUNIT 8 [UDP-FORMING]	-1.03608	1.41446e-48
Glyma.02G307700.Wm82.a4.v1	(1 of 2) PTHR32077:SF3 - FASCICLIN-LIKE ARABINOGALACTAN PROTEIN 7	-1.04997	2.62821e-48
Glyma.02G273400.Wm82.a4.v1	(1 of 3) PTHR11926//PTHR11926:SF298 - GLUCOSYL/GLUCURONOSYL TRANSFERASES // SUBFAMILY NOT NAMED	-1.03343	7.50603e-09
Glyma.09G087200.Wm82.a4.v1	(1 of 13) K08150 - MFS transporter, SP family, solute carrier family 2 (myo-inositol transporter), member 13 (SLC2A13, ITR)	-1.06183	0.00090063
Glyma.13G372200.Wm82.a4.v1	(1 of 5) 1.1.1.95 - Phosphoglycerate dehydrogenase / Phosphoglyceric acid dehydrogenase	-3.95372	6.6929e-28
Glyma.08G359100.Wm82.a4.v1	(1 of 6) PTHR11709//PTHR11709:SF66 - MULTI-COPPER OXIDASE // LACCASE-17	-1.14009	9.14639e-21
Glyma.12G202500.Wm82.a4.v1	(1 of 2) K08902 - photosystem II Psb27 protein (psb27)	-1.98514	0.00740991
Glyma.16G043000.Wm82.a4.v1	(1 of 3) PF14200 - Ricin-type beta-trefoil lectin domain-like (RicinB_lectin_2)	-4.4386	0.00864276
Glyma.17G140300.Wm82.a4.v1	(1 of 8) PTHR31731//PTHR31731:SF7 - FAMILY NOT NAMED // BIFUNCTIONAL INHIBITOR/LIPID-TRANSFER PROTEIN/SEED STORAGE 2S ALBUMIN SUPERFAMILY PROTEIN	-2.32212	2.79104e-127
Glyma.15G007801.Wm82.a4.v1	(1 of 6) PTHR27002//PTHR27002:SF31 - FAMILY NOT NAMED // G-TYPE LECTIN S-RECEPTOR-LIKE SERINE/THREONINE-PROTEIN KINASE SD2-5	-1.65027	2.14249e-11
Glyma.19G142700.Wm82.a4.v1	-	-1.07589	5.16875e-27
Glyma.12G191700.Wm82.a4.v1	(1 of 8) PTHR13301//PTHR13301:SF53 - X-BOX TRANSCRIPTION FACTOR-RELATED // CELLULOSE SYNTHASE-LIKE PROTEIN B1-RELATED	-6.30602	1.21755e-06
Glyma.13G093700.Wm82.a4.v1	(1 of 20) PF00069//PF00582 - Protein kinase domain (Pkinase) // Universal stress protein family (Usp)	-1.20944	0.000932556
Glyma.11G169891.Wm82.a4.v1	(1 of 7) 2.3.3.14 - Homocitrate synthase / Homocitrate synthetase	-5.076	0.000694226
Glyma.05G247800.Wm82.a4.v1	(1 of 5) K14379 - tartrate-resistant acid phosphatase type 5 (ACP5)	-1.92497	2.7594e-23
Glyma.05G051500.Wm82.a4.v1	(1 of 5) PTHR10795//PTHR10795:SF369 - PROPROTEIN CONVERTASE SUBTILISIN/KEXIN // SUBFAMILY NOT NAMED	-10.7373	1.10166e-19
Glyma.19G047702.Wm82.a4.v1	(1 of 9) PTHR26402//PTHR26402:SF593 - RESPONSE REGULATOR OF TWO-COMPONENT SYSTEM // SUBFAMILY NOT NAMED	-3.3077	4.59333e-05
Glyma.19G181800.Wm82.a4.v1	(1 of 4) PTHR33083//PTHR33083:SF10 - FAMILY NOT NAMED // ARABIDOPSIS THALIANA GENOMIC DNA, CHROMOSOME 5, P1 CLONE:MOK16	-4.26292	0.00367952
Glyma.08G183200.Wm82.a4.v1	-	-1.08006	0.00472485
Glyma.06G275900.Wm82.a4.v1	(1 of 154) K00430 - peroxidase (E1.11.1.7)	-1.17756	1.33541e-11
Glyma.08G108000.Wm82.a4.v1	(1 of 4) K17285 - selenium-binding protein 1 (SELENBP1)	-10.3096	3.15282e-18
Glyma.15G107900.Wm82.a4.v1	(1 of 3) K02115 - F-type H+-transporting ATPase subunit gamma (ATPF1G, atpG)	-1.20429	4.20322e-05
Glyma.05G051300.Wm82.a4.v1	(1 of 4) PTHR31032//PTHR31032:SF1 - FAMILY NOT NAMED // PGR5-LIKE PROTEIN 1A, CHLOROPLASTIC-RELATED	-1.13205	0.00195013
Glyma.02G218300.Wm82.a4.v1	(1 of 6) 1.2.1.70 - Glutamyl-tRNA reductase	-5.60623	1.06914e-05
Glyma.13G302900.Wm82.a4.v1	(1 of 2) 1.10.9.1 - Plastoquinol--plastocyanin reductase / Cytochrome b6f complex	-1.21117	3.82246e-11
Glyma.12G048900.Wm82.a4.v1	(1 of 1) PTHR30560//PTHR30560:SF2 - TRIGGER FACTOR CHAPERONE AND PEPTIDYL-PROLYL CIS/TRANS ISOMERASE // SUBFAMILY NOT NAMED	-1.23197	0.00155555
Glyma.17G246000.Wm82.a4.v1	(1 of 2) PTHR31391//PTHR31391:SF17 - FAMILY NOT NAMED // B3 DOMAIN-CONTAINING PROTEIN REM16	-1.25588	2.94258e-06
Glyma.05G197900.Wm82.a4.v1	(1 of 7) PTHR23324:SF48 - PATELLIN-3-RELATED	-1.14623	1.01067e-63
Glyma.04G078000.Wm82.a4.v1	(1 of 155) K14488 - SAUR family protein (SAUR)	-1.19203	7.74085e-12
Glyma.07G206000.Wm82.a4.v1	(1 of 6) PTHR23213//PTHR23213:SF220 - FORMIN-RELATED // SUBFAMILY NOT NAMED	-2.94133	2.6864e-09
Glyma.13G164800.Wm82.a4.v1	(1 of 4) PTHR31065//PTHR31065:SF11 - FAMILY NOT NAMED // PLATZ TRANSCRIPTION FACTOR FAMILY PROTEIN	-1.39448	0.00423853
Glyma.02G098200.Wm82.a4.v1	(1 of 5) PTHR22950//PTHR22950:SF327 - AMINO ACID TRANSPORTER // LYSINE HISTIDINE TRANSPORTER-LIKE 6	-5.84004	1.78291e-05
Glyma.15G038700.Wm82.a4.v1	(1 of 9) PTHR11937//PTHR11937:SF255 - ACTIN // SUBFAMILY NOT NAMED	-1.14245	4.74732e-07
Glyma.10G256100.Wm82.a4.v1	-	-3.39472	5.33867e-08
Glyma.01G175200.Wm82.a4.v1	(1 of 4) PTHR14255//PTHR14255:SF11 - ATP-DEPENDENT PROTEASE CEREBLON // SUBFAMILY NOT NAMED	-2.01966	8.22356e-21
Glyma.17G247400.Wm82.a4.v1	(1 of 3) PTHR11206//PTHR11206:SF115 - MULTIDRUG RESISTANCE PROTEIN // MATE EFFLUX FAMILY PROTEIN	-1.65796	1.84602e-06
Glyma.06G151900.Wm82.a4.v1	(1 of 6) PTHR11183:SF56 - UDP-GLUCURONATE:XYLAN ALPHA-GLUCURONOSYLTRANSFERASE 3-RELATED	-1.95635	8.71926e-27
Glyma.14G064400.Wm82.a4.v1	(1 of 14) PTHR10795//PTHR10795:SF348 - PROPROTEIN CONVERTASE SUBTILISIN/KEXIN // SUBFAMILY NOT NAMED	-8.97777	5.69873e-14
Glyma.20G243500.Wm82.a4.v1	(1 of 2) 2.2.1.1//2.2.1.2 - Transketolase / Glycoaldehyde transferase // Transaldolase / Glycerone transferase	-2.93801	1.39225e-11
Glyma.16G154800.Wm82.a4.v1	-	-1.79482	0.00268878
Glyma.04G079200.Wm82.a4.v1	(1 of 3) PF01152 - Bacterial-like globin (Bac_globin)	-5.40069	9.65828e-37
Glyma.13G249300.Wm82.a4.v1	(1 of 11) PTHR27002//PTHR27002:SF51 - FAMILY NOT NAMED // CYSTEINE-RICH RECEPTOR-LIKE PROTEIN KINASE 25-RELATED	-1.50503	1.58724e-12
Glyma.08G021100.Wm82.a4.v1	(1 of 12) PF06376 - Protein of unknown function (DUF1070) (DUF1070)	-1.2698	7.83516e-11
Glyma.12G173800.Wm82.a4.v1	(1 of 36) PTHR32077//PTHR32077:SF7 - FAMILY NOT NAMED // FASCICLIN-LIKE ARABINOGALACTAN PROTEIN 11	-1.0595	1.54181e-49
Glyma.08G304200.Wm82.a4.v1	(1 of 4) PTHR31407:SF6 - OXYGEN-EVOLVING ENHANCER PROTEIN 2-1, CHLOROPLASTIC-RELATED	-1.88707	0.00477296
Glyma.14G115500.Wm82.a4.v1	(1 of 4) PTHR31731//PTHR31731:SF19 - FAMILY NOT NAMED // BIFUNCTIONAL INHIBITOR/LIPID-TRANSFER PROTEIN/SEED STORAGE 2S ALBUMIN SUPERFAMILY PROTEIN	-2.78493	1.91676e-10
Glyma.18G009500.Wm82.a4.v1	(1 of 4) PTHR24198//PTHR24198:SF77 - ANKYRIN REPEAT AND PROTEIN KINASE DOMAIN-CONTAINING PROTEIN // SUBFAMILY NOT NAMED	-1.17407	1.49053e-11
Glyma.01G206100.Wm82.a4.v1	(1 of 1) PTHR36368:SF1 - GENOMIC DNA, CHROMOSOME 3, TAC CLONE:K17E7	-1.35455	0.00680075
Glyma.17G092800.Wm82.a4.v1	(1 of 9) PTHR23201//PTHR23201:SF18 - EXTENSIN, PROLINE-RICH PROTEIN // SUBFAMILY NOT NAMED	-2.10687	1.28758e-22
Glyma.13G077800.Wm82.a4.v1	(1 of 131) PF00892 - EamA-like transporter family (EamA)	-1.37926	0.00148717
Glyma.04G214000.Wm82.a4.v1	(1 of 2) PTHR31080//PTHR31080:SF1 - FAMILY NOT NAMED // CELL WALL / VACUOLAR INHIBITOR OF FRUCTOSIDASE 2-RELATED	-1.20383	1.69706e-09
Glyma.13G051000.Wm82.a4.v1	(1 of 1) PTHR11055//PTHR11055:SF25 - ADENYLSULFATE KINASE/SULFATE ADENYLTRANSFERASE // ATP SULFURYLASE 2	-1.53069	4.05829e-06
Glyma.17G248600.Wm82.a4.v1	(1 of 11) KOG2966 - Uncharacterized conserved protein	-4.53784	0.000112562
Glyma.13G282000.Wm82.a4.v1	(1 of 2) K08914 - light-harvesting complex II chlorophyll a/b binding protein 3 (LHCB3)	-1.32239	1.82833e-13
Glyma.11G195000.Wm82.a4.v1	-	-2.41434	9.23525e-12
Glyma.19G248300.Wm82.a4.v1	(1 of 25) PF04852 - Protein of unknown function (DUF640) (DUF640)	-2.3091	3.82795e-25
Glyma.04G005200.Wm82.a4.v1	(1 of 18) KOG2922 - Uncharacterized conserved protein	-1.71832	0.000966773
Glyma.08G325600.Wm82.a4.v1	(1 of 4) PTHR13902:SF44 - SERINE/THREONINE-PROTEIN KINASE WNK11-RELATED	-1.81554	8.48335e-07
Glyma.16G201200.Wm82.a4.v1	(1 of 63) K04733 - interleukin-1 receptor-associated kinase 4 (IRAK4)	-3.50861	7.63788e-19
Glyma.05G226100.Wm82.a4.v1	(1 of 4) PTHR32295//PTHR32295:SF22 - FAMILY NOT NAMED // PROTEIN IQ-DOMAIN 25	-3.1251	0.000784854
Glyma.16G062000.Wm82.a4.v1	(1 of 3) PF13418//PF13964 - Galactose oxidase, central domain (Kelch_4) // Kelch motif (Kelch_6)	-1.10439	3.89097e-06
Glyma.08G043500.Wm82.a4.v1	(1 of 37) PF04749 - PLAC8 family (PLAC8)	-8.80719	2.01692e-13
Glyma.15G104100.Wm82.a4.v1	-	-1.19078	2.14222e-06
Glyma.17G127900.Wm82.a4.v1	(1 of 6) PTHR33595//PTHR33595:SF3 - FAMILY NOT NAMED // EMB|CAB62340.1-RELATED	-2.98116	3.73416e-08
Glyma.09G050600.Wm82.a4.v1	(1 of 2) PTHR11785:SF267 - CATIONIC AMINO ACID TRANSPORTER 5	-5.19132	7.72605e-05
Glyma.10G013900.Wm82.a4.v1	(1 of 4) PTHR30620//PTHR30620:SF4 - PERIPLASMIC BETA-GLUCOSIDASE-RELATED // BETA-D-XYLOSIDASE 2-RELATED	-1.42093	8.62853e-08
Glyma.02G046800.Wm82.a4.v1	(1 of 3) PTHR11607//PTHR11607:SF18 - ALPHA-MANNOSIDASE // ALPHA-MANNOSIDASE	-1.08084	5.96613e-31
Glyma.02G146100.Wm82.a4.v1	(1 of 38) PF04570 - zinc-finger of the FCS-type, C2-C2 (zf-FLZ)	-1.00848	6.14183e-07
Glyma.07G191100.Wm82.a4.v1	(1 of 8) 3.1.30.1 - Aspergillus nuclease S(1) / Single-stranded-nucleate endonuclease	-5.55966	0.000104521
Glyma.16G068900.Wm82.a4.v1	(1 of 1) PTHR22835//PTHR22835:SF219 - ZINC FINGER FYVE DOMAIN CONTAINING PROTEIN // SUBFAMILY NOT NAMED	-1.21726	1.83462e-12
Glyma.18G249502.Wm82.a4.v1	(1 of 176) PF03106 - WRKY DNA -binding domain (WRKY)	-1.51125	6.45567e-06
Glyma.05G088400.Wm82.a4.v1	(1 of 3) PTHR24198//PTHR24198:SF85 - ANKYRIN REPEAT AND PROTEIN KINASE DOMAIN-CONTAINING PROTEIN // IKB-1	-2.1375	1.21148e-07
Glyma.17G016100.Wm82.a4.v1	(1 of 6) PTHR32285:SF65 - PROTEIN TRICHOME BIREFRINGENCE-LIKE 10-RELATED	-1.44597	0.00599785
Glyma.03G246200.Wm82.a4.v1	(1 of 46) PF00612//PF13178 - IQ calmodulin-binding motif (IQ) // Protein of unknown function (DUF4005) (DUF4005)	-6.52967	1.0086e-07
Glyma.13G318600.Wm82.a4.v1	(1 of 16) PF07876 - Stress responsive A/B Barrel Domain (Dabb)	-3.92863	1.98788e-12
Glyma.06G129400.Wm82.a4.v1	(1 of 2) PTHR12526//PTHR12526:SF17 - GLYCOSYLTRANSFERASE // STARCH SYNTHASE 1, CHLOROPLASTIC/AMYLOPLASTIC	-1.45394	6.12856e-10
Glyma.15G102100.Wm82.a4.v1	(1 of 6) PTHR12277:SF58 - ALPHA/BETA-HYDROLASES SUPERFAMILY PROTEIN	-1.11367	0.00735873
Glyma.15G057700.Wm82.a4.v1	(1 of 2) PTHR11002//PTHR11002:SF12 - CARBONIC ANHYDRASE // SUBFAMILY NOT NAMED	-1.13389	3.75269e-09
Glyma.10G135500.Wm82.a4.v1	-	-4.36536	2.35554e-14
Glyma.04G003200.Wm82.a4.v1	(1 of 3) PTHR19139//PTHR19139:SF152 - AQUAPORIN TRANSPORTER // AQUAPORIN PIP2-7	-1.02767	2.17316e-57
Glyma.03G073600.Wm82.a4.v1	(1 of 5) PTHR33101:SF1 - ROP GUANINE NUCLEOTIDE EXCHANGE FACTOR 7	-1.62048	0.000221219
Glyma.08G132700.Wm82.a4.v1	(1 of 2) PTHR21327:SF11 - MONOFUNCTIONAL RIBOFLAVIN BIOSYNTHESIS PROTEIN RIBA 2, CHLOROPLASTIC	-4.99725	7.10169e-06
Glyma.18G241700.Wm82.a4.v1	(1 of 2) K02699 - photosystem I subunit XI (psaL)	-1.21775	3.54983e-27
Glyma.18G027300.Wm82.a4.v1	(1 of 12) K05857 - phosphatidylinositol phospholipase C, delta (PLCD)	-2.17376	0.00637287
Glyma.04G041400.Wm82.a4.v1	(1 of 10) PF00069//PF13855 - Protein kinase domain (Pkinase) // Leucine rich repeat (LRR_8)	-1.01788	2.6548e-05
Glyma.03G140700.Wm82.a4.v1	(1 of 49) KOG0472//KOG1187 - Leucine-rich repeat protein // Serine/threonine protein kinase	-1.66684	1.15888e-17
Glyma.20G121800.Wm82.a4.v1	(1 of 2) K18753 - butyrate response factor 1 (ZFP36L)	-1.15845	1.1791e-07
Glyma.01G122800.Wm82.a4.v1	(1 of 5) PTHR31503:SF1 - VACUOLAR CATION/PROTON EXCHANGER 1-RELATED	-1.91595	1.1239e-05
Glyma.02G002000.Wm82.a4.v1	(1 of 3) K12502 - MPBQ/MSBQ methyltransferase (VTE3, APG1)	-2.23591	3.99406e-06
Glyma.14G062300.Wm82.a4.v1	(1 of 1) PTHR11709//PTHR11709:SF80 - MULTI-COPPER OXIDASE // SUBFAMILY NOT NAMED	-1.10655	8.09619e-44
Glyma.15G124700.Wm82.a4.v1	(1 of 9) 1.16.1.7 - Ferric-chelate reductase (NADH) / NADH:Fe(3+)-EDTA reductase	-2.78729	3.72108e-06
Glyma.12G219300.Wm82.a4.v1	(1 of 2) K08914 - light-harvesting complex II chlorophyll a/b binding protein 3 (LHCB3)	-1.70669	1.51104e-11
Glyma.06G167200.Wm82.a4.v1	(1 of 36) PTHR23155//PTHR23155:SF563 - LEUCINE-RICH REPEAT-CONTAINING PROTEIN // SUBFAMILY NOT NAMED	-2.41988	0.00971017
Glyma.14G222500.Wm82.a4.v1	(1 of 1) PTHR10438:SF247 - THIOREDOXIN-LIKE PROTEIN CDSP32, CHLOROPLASTIC	-1.14218	0.001139
Glyma.13G196200.Wm82.a4.v1	(1 of 4) PTHR13683//PTHR13683:SF258 - ASPARTYL PROTEASES // ASPARTYL PROTEASE FAMILY PROTEIN-RELATED	-1.18707	9.35045e-25
Glyma.06G022500.Wm82.a4.v1	(1 of 6) PTHR10795//PTHR10795:SF328 - PROPROTEIN CONVERTASE SUBTILISIN/KEXIN // SUBFAMILY NOT NAMED	-2.45206	4.21955e-05
Glyma.16G026200.Wm82.a4.v1	(1 of 4) K17525 - chitinase domain-containing protein 1 (CHID1)	-1.25643	1.97221e-12
Glyma.06G216500.Wm82.a4.v1	(1 of 8) PF03386 - Early nodulin 93 ENOD93 protein (ENOD93)	-8.32239	6.00403e-16
Glyma.13G160400.Wm82.a4.v1	(1 of 34) PF14547 - Hydrophobic seed protein (Hydrophob_seed)	-1.32454	6.637e-191
Glyma.20G085500.Wm82.a4.v1	(1 of 56) 3.1.3.2 - Acid phosphatase / Phosphomonoesterase	-1.46975	2.59534e-14
Glyma.01G012000.Wm82.a4.v1	(1 of 2) PTHR23155//PTHR23155:SF599 - LEUCINE-RICH REPEAT-CONTAINING PROTEIN // SUBFAMILY NOT NAMED	-1.86305	1.65882e-07
Glyma.03G117000.Wm82.a4.v1	(1 of 131) PF00892 - EamA-like transporter family (EamA)	-1.75673	1.11104e-05
Glyma.02G061100.Wm82.a4.v1	(1 of 4) K02716 - photosystem II oxygen-evolving enhancer protein 1 (psbO)	-1.21141	2.68393e-07
Glyma.01G179400.Wm82.a4.v1	(1 of 32) 1.14.13.121 - Premnaspirodiene oxygenase / Hyoscymus muticus premnaspirodiene oxygenase	-1.09427	1.3139e-05
Glyma.04G187300.Wm82.a4.v1	(1 of 4) PTHR10641//PTHR10641:SF466 - MYB-LIKE DNA-BINDING PROTEIN MYB // SUBFAMILY NOT NAMED	-1.31119	0.00190415
Glyma.19G139300.Wm82.a4.v1	(1 of 3) K03403 - magnesium chelatase subunit H (chlH, bchH)	-1.30579	4.80855e-15
Glyma.13G247200.Wm82.a4.v1	(1 of 5) PTHR10641:SF586 - MYB TRANSCRIPTION FACTOR-RELATED	-2.39458	4.91682e-06
Glyma.06G322100.Wm82.a4.v1	(1 of 6) PTHR31533:SF2 - GPI-ANCHORED PROTEIN LORELEI-RELATED	-2.80471	3.57966e-07
Glyma.07G067000.Wm82.a4.v1	(1 of 5) PTHR31339:SF12 - POLYGALACTURONASE-LIKE PROTEIN	-7.98046	2.40511e-11
Glyma.10G258000.Wm82.a4.v1	(1 of 2) PTHR32370:SF4 - BTB/POZ DOMAIN-CONTAINING PROTEIN NPY2	-1.00459	2.16798e-08
Glyma.05G194400.Wm82.a4.v1	(1 of 4) PTHR22870//PTHR22870:SF193 - REGULATOR OF CHROMOSOME CONDENSATION // SUBFAMILY NOT NAMED	-1.02841	2.79886e-38
Glyma.13G197300.Wm82.a4.v1	(1 of 8) PTHR31604:SF2 - PROTEIN SHI RELATED SEQUENCE 6	-1.27299	1.85529e-12
Glyma.06G219600.Wm82.a4.v1	(1 of 13) K01246 - DNA-3-methyladenine glycosylase I (tag)	-1.04479	0.000201631
Glyma.03G179900.Wm82.a4.v1	(1 of 36) PTHR32077//PTHR32077:SF7 - FAMILY NOT NAMED // FASCICLIN-LIKE ARABINOGALACTAN PROTEIN 11	-1.03048	2.51841e-44
Glyma.17G208200.Wm82.a4.v1	(1 of 14) PF04862 - Protein of unknown function (DUF642) (DUF642)	-1.81687	0.000709834
Glyma.19G105500.Wm82.a4.v1	(1 of 5) PF06839 - GRF zinc finger (zf-GRF)	-3.31884	4.57873e-48
Glyma.02G258600.Wm82.a4.v1	-	-1.15463	5.04595e-05
Glyma.03G158700.Wm82.a4.v1	(1 of 55) K14484 - auxin-responsive protein IAA (IAA)	-2.22127	3.60642e-10
Glyma.07G139100.Wm82.a4.v1	(1 of 5) PTHR11654:SF79 - PROTEIN NRT1/ PTR FAMILY 5.5-RELATED	-1.44137	4.96793e-11
Glyma.04G188700.Wm82.a4.v1	(1 of 6) K02358 - elongation factor Tu (tuf, TUFM)	-1.15007	6.93704e-09
Glyma.16G118800.Wm82.a4.v1	(1 of 4) PTHR23416//PTHR23416:SF63 - SIALIC ACID SYNTHASE-RELATED // SERINE ACETYLTRANSFERASE 2-RELATED	-1.22545	1.83923e-06
Glyma.12G046800.Wm82.a4.v1	(1 of 80) PF14009 - Domain of unknown function (DUF4228) (DUF4228)	-2.05777	3.1789e-13
Glyma.05G121700.Wm82.a4.v1	-	-7.99444	4.21443e-11
Glyma.02G201600.Wm82.a4.v1	(1 of 2) PTHR15852:SF8 - CHAPERONE PROTEIN DNAJ-LIKE PROTEIN	-1.09381	0.0041477
Glyma.02G128000.Wm82.a4.v1	(1 of 4) PTHR11570//PTHR11570:SF4 - S-ADENOSYLMETHIONINE DECARBOXYLASE // S-ADENOSYLMETHIONINE DECARBOXYLASE PROENZYME-RELATED	-1.12183	6.39936e-10
Glyma.13G300600.Wm82.a4.v1	(1 of 17) PF04484 - Family of unknown function (DUF566) (DUF566)	-5.66746	8.65836e-06
Glyma.01G159200.Wm82.a4.v1	(1 of 2) PTHR32002:SF13 - PROTEIN RKD5	-1.60929	0.00103114
Glyma.08G270300.Wm82.a4.v1	(1 of 3) PTHR24221:SF138 - LP14331P-RELATED	-1.52226	3.51267e-06
Glyma.18G187600.Wm82.a4.v1	(1 of 8) PTHR11732:SF223 - ALDO-KETO REDUCTASE FAMILY 4 MEMBER C10	-3.09099	0.00531162
Glyma.16G204600.Wm82.a4.v1	(1 of 3) PTHR11902//PTHR11902:SF18 - ENOLASE // SUBFAMILY NOT NAMED	-1.01803	6.98927e-41
Glyma.10G260900.Wm82.a4.v1	(1 of 5) K15923 - alpha-L-fucosidase 2 (AXY8, FUC95A, afcA)	-1.54686	1.25421e-34
Glyma.18G150000.Wm82.a4.v1	(1 of 2) PTHR11680:SF10 - SERINE HYDROXYMETHYLTRANSFERASE 1, MITOCHONDRIAL	-1.6311	2.58319e-06
Glyma.10G243800.Wm82.a4.v1	(1 of 2) PTHR14154//PTHR14154:SF5 - UPF0041 BRAIN PROTEIN 44-RELATED // EARLY LIGHT-INDUCED PROTEIN 1, CHLOROPLASTIC-RELATED	-1.84931	3.41712e-94
Glyma.13G177100.Wm82.a4.v1	-	-6.73777	1.12577e-07
Glyma.01G198900.Wm82.a4.v1	(1 of 4) PTHR31500//PTHR31500:SF17 - FAMILY NOT NAMED // AT HOOK MOTIF DNA-BINDING FAMILY PROTEIN	-1.1855	0.00752329
Glyma.06G112700.Wm82.a4.v1	(1 of 4) PTHR31964//PTHR31964:SF37 - FAMILY NOT NAMED // ADENINE NUCLEOTIDE ALPHA HYDROLASE-LIKE PROTEIN	-1.88705	0.00622319
Glyma.07G088200.Wm82.a4.v1	(1 of 3) PTHR11814:SF54 - SULFATE TRANSPORTER 3.5-RELATED	-3.78618	9.59715e-14
Glyma.06G303300.Wm82.a4.v1	(1 of 106) PF03168 - Late embryogenesis abundant protein (LEA_2)	-3.33827	3.62229e-05
Glyma.08G305900.Wm82.a4.v1	(1 of 39) K15032 - mTERF domain-containing protein, mitochondrial (MTERFD)	-1.02792	0.00235631
Glyma.15G034500.Wm82.a4.v1	(1 of 2) PTHR10641//PTHR10641:SF640 - MYB-LIKE DNA-BINDING PROTEIN MYB // TRANSCRIPTION FACTOR MYB46	-1.34303	0.00245181
Glyma.13G096900.Wm82.a4.v1	(1 of 2) PTHR32467:SF23 - AP2-LIKE ETHYLENE-RESPONSIVE TRANSCRIPTION FACTOR AIL5	-1.04015	1.36507e-12
Glyma.18G063200.Wm82.a4.v1	(1 of 14) K07300 - Ca2+:H+ antiporter (chaA, CAX)	-1.84217	4.17113e-11
Glyma.18G114900.Wm82.a4.v1	(1 of 4) PTHR31407:SF6 - OXYGEN-EVOLVING ENHANCER PROTEIN 2-1, CHLOROPLASTIC-RELATED	-1.16704	1.21628e-05
Glyma.12G135300.Wm82.a4.v1	(1 of 39) K05658 - ATP-binding cassette, subfamily B (MDR/TAP), member 1 (ABCB1)	-2.48616	1.1664e-09
Glyma.05G053300.Wm82.a4.v1	(1 of 3) K14423 - 4,4-dimethyl-9beta,19-cyclopropylsterol-4alpha-methyl oxidase (SMO1)	-1.1006	1.33513e-16
Glyma.05G223200.Wm82.a4.v1	(1 of 3) PTHR12161:SF13 - REGULATOR OF VPS4 ACTIVITY PROTEIN-RELATED	-5.00272	3.84754e-24
Glyma.03G102000.Wm82.a4.v1	-	-5.62055	5.29629e-05
Glyma.07G212800.Wm82.a4.v1	(1 of 2) 1.7.7.1 - Ferredoxin--nitrite reductase	-1.80691	0.000122487
Glyma.06G319000.Wm82.a4.v1	(1 of 1) PTHR31707:SF60 - PECTINESTERASE INHIBITOR 1-RELATED	-4.01872	0.00101451
Glyma.08G074000.Wm82.a4.v1	(1 of 3) K08917 - light-harvesting complex II chlorophyll a/b binding protein 6 (LHCB6)	-1.49297	8.88816e-09
Glyma.09G155500.Wm82.a4.v1	(1 of 11) PTHR33107//PTHR33107:SF1 - FAMILY NOT NAMED // DR4 PROTEIN-RELATED	-1.07565	1.04901e-230
Glyma.18G218500.Wm82.a4.v1	(1 of 6) PTHR24282:SF36 - CYTOCHROME P450 714A1-RELATED	-2.51671	0.000407131
Glyma.13G197600.Wm82.a4.v1	(1 of 4) PTHR26402//PTHR26402:SF574 - RESPONSE REGULATOR OF TWO-COMPONENT SYSTEM // SUBFAMILY NOT NAMED	-2.53644	3.15795e-08
Glyma.14G089012.Wm82.a4.v1	(1 of 4) PTHR23083//PTHR23083:SF431 - TETRATRICOPEPTIDE REPEAT PROTEIN, TPR // SUBFAMILY NOT NAMED	-1.11749	1.76363e-09
Glyma.12G221100.Wm82.a4.v1	(1 of 2) PTHR22953//PTHR22953:SF39 - ACID PHOSPHATASE RELATED // SUBFAMILY NOT NAMED	-2.16202	1.80763e-07
Glyma.05G180700.Wm82.a4.v1	(1 of 5) PTHR10551//PTHR10551:SF13 - FASCIN // SUBFAMILY NOT NAMED	-1.14979	4.65426e-08
Glyma.16G132800.Wm82.a4.v1	(1 of 6) PTHR31388:SF3 - PEROXIDASE 36-RELATED	-1.98585	2.30555e-50
Glyma.19G243100.Wm82.a4.v1	(1 of 30) PF05910 - Plant protein of unknown function (DUF868) (DUF868)	-1.96617	1.87108e-08
Glyma.03G074600.Wm82.a4.v1	(1 of 13) PTHR11220 - HEME-BINDING PROTEIN-RELATED	-1.25825	3.62814e-15
Glyma.09G134100.Wm82.a4.v1	(1 of 8) PTHR11206//PTHR11206:SF109 - MULTIDRUG RESISTANCE PROTEIN // MATE EFFLUX FAMILY PROTEIN	-1.30399	5.37126e-09
Glyma.15G194200.Wm82.a4.v1	(1 of 5) PTHR31422//PTHR31422:SF1 - FAMILY NOT NAMED // EXPRESSED PROTEIN	-1.12873	0.000727146
Glyma.04G007300.Wm82.a4.v1	(1 of 4) 2.4.2.14 - Amidophosphoribosyltransferase / Phosphoribosyldiphosphate 5-amidotransferase	-1.07722	0.000816804
Glyma.05G230700.Wm82.a4.v1	(1 of 18) K17710 - pentatricopeptide repeat domain-containing protein 1 (PTCD1)	-1.73098	1.21935e-07
Glyma.10G132500.Wm82.a4.v1	(1 of 100) PF14368 - Probable lipid transfer (LTP_2)	-1.59679	2.23696e-14
Glyma.19G164700.Wm82.a4.v1	(1 of 65) PF05553 - Cotton fibre expressed protein (DUF761)	-1.87975	5.67892e-05
Glyma.06G005000.Wm82.a4.v1	(1 of 18) KOG2922 - Uncharacterized conserved protein	-2.34668	0.000647578
Glyma.01G190402.Wm82.a4.v1	(1 of 7) 1.14.13.89 - Isoflavone 2'-hydroxylase / Isoflavone 2'-monooxygenase	-2.56936	0.000569137
Glyma.01G037500.Wm82.a4.v1	(1 of 8) PTHR26402:SF526 - TWO-COMPONENT RESPONSE REGULATOR ARR15-RELATED	-3.06886	1.17023e-15
Glyma.16G172400.Wm82.a4.v1	(1 of 5) K05666 - ATP-binding cassette, subfamily C (CFTR/MRP), member 2 (ABCC2)	-1.09235	2.62265e-06
Glyma.09G278100.Wm82.a4.v1	-	-3.95534	1.01704e-17
Glyma.19G179100.Wm82.a4.v1	(1 of 4) PTHR10896:SF16 - BETA-1,4-XYLOSYLTRANSFERASE IRX9-RELATED	-1.20749	6.47582e-21
Glyma.13G092000.Wm82.a4.v1	(1 of 2) PTHR14155:SF80 - RING-H2 FINGER PROTEIN ATL13-RELATED	-1.82702	2.06239e-12
Glyma.06G145200.Wm82.a4.v1	(1 of 5) PTHR11654:SF155 - PROTEIN NRT1/ PTR FAMILY 5.1	-6.13032	8.13696e-07
Glyma.05G163900.Wm82.a4.v1	(1 of 5) PTHR31062//PTHR31062:SF34 - FAMILY NOT NAMED // XYLOGLUCAN ENDOTRANSGLUCOSYLASE/HYDROLASE PROTEIN 15-RELATED	-3.06067	3.04461e-06
Glyma.10G156600.Wm82.a4.v1	(1 of 4) PTHR11969//PTHR11969:SF26 - MAX DIMERIZATION, MAD // TRANSCRIPTION FACTOR BHLH99	-1.32069	7.39868e-22
Glyma.07G203100.Wm82.a4.v1	(1 of 2) PTHR24072//PTHR24072:SF178 - RHO FAMILY GTPASE // SUBFAMILY NOT NAMED	-1.14015	8.14114e-09
Glyma.11G228300.Wm82.a4.v1	(1 of 4) PTHR22950//PTHR22950:SF260 - AMINO ACID TRANSPORTER // SUBFAMILY NOT NAMED	-1.1314	1.14843e-17
Glyma.17G059800.Wm82.a4.v1	(1 of 4) PTHR10795//PTHR10795:SF431 - PROPROTEIN CONVERTASE SUBTILISIN/KEXIN // SUBTILISIN SERINE PROTEASE-RELATED	-1.11307	3.70392e-147
Glyma.02G044200.Wm82.a4.v1	(1 of 2) PF03171//PF13640 - 2OG-Fe(II) oxygenase superfamily (2OG-FeII_Oxy) // 2OG-Fe(II) oxygenase superfamily (2OG-FeII_Oxy_3)	-6.40549	5.16731e-26
Glyma.04G020200.Wm82.a4.v1	(1 of 2) 4.1.1.17 - Ornithine decarboxylase / L-ornithine carboxy-lyase	-1.83836	5.17873e-24
Glyma.07G228300.Wm82.a4.v1	(1 of 2) K00592 - [ribulose-bisphosphate carboxylase]-lysine N-methyltransferase (E2.1.1.127)	-1.92131	0.00638705
Glyma.06G005100.Wm82.a4.v1	(1 of 2) PTHR11071:SF264 - PEPTIDYL-PROLYL CIS-TRANS ISOMERASE CYP19-1	-1.86324	1.35902e-05
Glyma.19G035800.Wm82.a4.v1	(1 of 7) PTHR11926//PTHR11926:SF280 - GLUCOSYL/GLUCURONOSYL TRANSFERASES // SUBFAMILY NOT NAMED	-2.67923	9.56057e-110
Glyma.04G172900.Wm82.a4.v1	(1 of 5) PTHR19229//PTHR19229:SF127 - ATP-BINDING CASSETTE TRANSPORTER SUBFAMILY A ABCA // SUBFAMILY NOT NAMED	-1.60632	1.90645e-16
Glyma.05G053400.Wm82.a4.v1	-	-2.71584	6.55459e-05
Glyma.11G176200.Wm82.a4.v1	(1 of 2) 4.1.99.17 - Phosphomethylpyrimidine synthase	-5.5548	9.00339e-05
Glyma.14G089039.Wm82.a4.v1	-	-1.05793	0.00787107
Glyma.13G282100.Wm82.a4.v1	(1 of 5) PTHR10641//PTHR10641:SF567 - MYB-LIKE DNA-BINDING PROTEIN MYB // SUBFAMILY NOT NAMED	-3.68211	1.49021e-08
Glyma.01G174400.Wm82.a4.v1	(1 of 11) PTHR23500:SF154 - POLYOL TRANSPORTER 3-RELATED	-6.61866	2.86385e-10
Glyma.02G042000.Wm82.a4.v1	(1 of 4) PTHR23416//PTHR23416:SF63 - SIALIC ACID SYNTHASE-RELATED // SERINE ACETYLTRANSFERASE 2-RELATED	-2.25206	0.000579982
Glyma.15G234700.Wm82.a4.v1	(1 of 8) PTHR11926//PTHR11926:SF286 - GLUCOSYL/GLUCURONOSYL TRANSFERASES // SUBFAMILY NOT NAMED	-2.14957	0.000668345
Glyma.12G154300.Wm82.a4.v1	-	-2.07039	1.65058e-83
Glyma.09G285700.Wm82.a4.v1	-	-1.69114	6.07091e-07
Glyma.07G134100.Wm82.a4.v1	(1 of 2) PTHR11709:SF62 - LACCASE-2	-1.15898	1.98812e-27
Glyma.18G274500.Wm82.a4.v1	(1 of 273) PF00646 - F-box domain (F-box)	-8.41791	1.526e-12
Glyma.09G140500.Wm82.a4.v1	(1 of 3) PTHR34067//PTHR34067:SF1 - FAMILY NOT NAMED // METHYL-CPG-BINDING DOMAIN-CONTAINING PROTEIN 13	-1.33228	5.19129e-05
Glyma.10G139800.Wm82.a4.v1	(1 of 8) PTHR31238//PTHR31238:SF39 - FAMILY NOT NAMED // GERMIN-LIKE PROTEIN SUBFAMILY 2 MEMBER 1-RELATED	-1.21062	6.22316e-37
Glyma.19G133702.Wm82.a4.v1	-	-1.95742	0.00010905
Glyma.05G029200.Wm82.a4.v1	(1 of 3) 1.2.1.88//1.5.1.12 - L-glutamate gamma-semialdehyde dehydrogenase / Pyrroline-5-carboxylate dehydrogenase // Transferred entry: 1.2.1.88	-1.27513	1.62366e-32
Glyma.17G090000.Wm82.a4.v1	(1 of 9) PTHR23257//PTHR23257:SF475 - SERINE-THREONINE PROTEIN KINASE // SUBFAMILY NOT NAMED	-2.79576	3.88231e-06
Glyma.11G231300.Wm82.a4.v1	(1 of 6) PTHR12565//PTHR12565:SF181 - STEROL REGULATORY ELEMENT-BINDING PROTEIN // SUBFAMILY NOT NAMED	-1.12493	5.16578e-07
Glyma.18G003200.Wm82.a4.v1	(1 of 5) PTHR31062//PTHR31062:SF34 - FAMILY NOT NAMED // XYLOGLUCAN ENDOTRANSGLUCOSYLASE/HYDROLASE PROTEIN 15-RELATED	-1.62862	7.60977e-46
Glyma.07G160700.Wm82.a4.v1	(1 of 399) PF00067 - Cytochrome P450 (p450)	-7.10467	8.42632e-12
Glyma.13G336700.Wm82.a4.v1	(1 of 2) PTHR22936:SF25 - PROTEIN RHOMBOID-LIKE 1	-1.13526	0.000978102
Glyma.10G203000.Wm82.a4.v1	(1 of 1) PF00005//PF01061//PF08370 - ABC transporter (ABC_tran) // ABC-2 type transporter (ABC2_membrane) // Plant PDR ABC transporter associated (PDR_assoc)	-2.83109	3.55207e-59
Glyma.06G092000.Wm82.a4.v1	(1 of 4) PTHR31945:SF6 - TRANSCRIPTION FACTOR BHLH61-RELATED	-1.78056	6.12627e-44
Glyma.18G081800.Wm82.a4.v1	(1 of 2) PTHR24106//PTHR24106:SF153 - FAMILY NOT NAMED // PROTEIN TORNADO 1	-1.53178	4.86299e-14
Glyma.07G196300.Wm82.a4.v1	(1 of 1) PTHR11615//PTHR11615:SF129 - NITRATE, FROMATE, IRON DEHYDROGENASE // SUBFAMILY NOT NAMED	-2.36339	0.000190615
Glyma.05G142400.Wm82.a4.v1	(1 of 1) PF00083//PF06609 - Sugar (and other) transporter (Sugar_tr) // Fungal trichothecene efflux pump (TRI12) (TRI12)	-1.09209	8.65753e-20
Glyma.14G203900.Wm82.a4.v1	(1 of 7) PTHR31867:SF22 - EXPANSIN-A8	-2.36834	0.000220324
Glyma.11G035700.Wm82.a4.v1	(1 of 4) PTHR10209//PTHR10209:SF214 - OXIDOREDUCTASE, 2OG-FE II OXYGENASE FAMILY PROTEIN // SUBFAMILY NOT NAMED	-4.34477	0.00226185
Glyma.14G064200.Wm82.a4.v1	(1 of 14) PTHR10795//PTHR10795:SF348 - PROPROTEIN CONVERTASE SUBTILISIN/KEXIN // SUBFAMILY NOT NAMED	-1.7403	4.05047e-44
Glyma.17G019300.Wm82.a4.v1	(1 of 4) PTHR10638//PTHR10638:SF36 - COPPER AMINE OXIDASE // AMINE OXIDASE-RELATED	-1.09572	2.87933e-289
Glyma.18G253100.Wm82.a4.v1	-	-3.88063	1.14201e-09
Glyma.07G226800.Wm82.a4.v1	(1 of 86) PF13912 - C2H2-type zinc finger (zf-C2H2_6)	-2.4889	0.00744835
Glyma.08G325400.Wm82.a4.v1	(1 of 2) PTHR24106//PTHR24106:SF153 - FAMILY NOT NAMED // PROTEIN TORNADO 1	-1.18234	3.04776e-13
Glyma.17G106300.Wm82.a4.v1	(1 of 4) PTHR31065//PTHR31065:SF11 - FAMILY NOT NAMED // PLATZ TRANSCRIPTION FACTOR FAMILY PROTEIN	-1.01414	0.000305371
Glyma.05G208700.Wm82.a4.v1	(1 of 8) PTHR19139//PTHR19139:SF169 - AQUAPORIN TRANSPORTER // AQUAPORIN PIP1-4-RELATED	-1.44894	1.23383e-69
Glyma.03G011200.Wm82.a4.v1	(1 of 4) PTHR31500:SF10 - AT HOOK MOTIF DNA-BINDING FAMILY PROTEIN	-1.12732	0.00118141
Glyma.10G134700.Wm82.a4.v1	(1 of 56) 3.1.3.2 - Acid phosphatase / Phosphomonoesterase	-1.31817	3.29052e-102
Glyma.13G244000.Wm82.a4.v1	-	-1.28538	0.00252237
Glyma.16G045000.Wm82.a4.v1	(1 of 6) PTHR31062//PTHR31062:SF15 - FAMILY NOT NAMED // XYLOGLUCAN ENDOTRANSGLUCOSYLASE/HYDROLASE PROTEIN 4-RELATED	-1.09789	5.16409e-110
Glyma.08G342100.Wm82.a4.v1	(1 of 21) PTHR33107:SF5 - KUNITZ FAMILY TRYPSIN AND PROTEASE INHIBITOR PROTEIN-RELATED	-4.79534	0.00217903
Glyma.11G128800.Wm82.a4.v1	(1 of 2) PTHR36707//PTHR36707:SF1 - FAMILY NOT NAMED // T20M3.17 PROTEIN	-7.4483	1.78308e-09
Glyma.13G104700.Wm82.a4.v1	(1 of 7) PTHR13878//PTHR13878:SF14 - GULONOLACTONE OXIDASE // SUBFAMILY NOT NAMED	-7.02081	6.85331e-09
Glyma.07G019700.Wm82.a4.v1	(1 of 2) PTHR34787//PTHR34787:SF1 - FAMILY NOT NAMED // PHOTOSYSTEM I REACTION CENTER SUBUNIT VI-1, CHLOROPLASTIC-RELATED	-1.03319	0.00185471
Glyma.17G192000.Wm82.a4.v1	(1 of 4) PTHR22950//PTHR22950:SF278 - AMINO ACID TRANSPORTER // AMINO ACID PERMEASE 1-RELATED	-1.83949	1.1919e-39
Glyma.02G061600.Wm82.a4.v1	(1 of 3) PTHR10438:SF272 - THIOREDOXIN-LIKE PROTEIN HCF164, CHLOROPLASTIC	-1.77777	0.00953678
Glyma.18G200500.Wm82.a4.v1	(1 of 5) PTHR31503:SF1 - VACUOLAR CATION/PROTON EXCHANGER 1-RELATED	-2.32313	0.0075552
Glyma.18G117800.Wm82.a4.v1	(1 of 36) PTHR11017//PTHR11017:SF162 - LEUCINE-RICH REPEAT-CONTAINING PROTEIN // SUBFAMILY NOT NAMED	-1.8817	0.00108652
Glyma.11G182600.Wm82.a4.v1	(1 of 2) PTHR23177//PTHR23177:SF20 - MKIAA1688 PROTEIN // RHO GTPASE-ACTIVATING PROTEIN 1-RELATED	-1.94372	1.95413e-06
Glyma.02G205800.Wm82.a4.v1	(1 of 5) PTHR13301//PTHR13301:SF28 - X-BOX TRANSCRIPTION FACTOR-RELATED // SUBFAMILY NOT NAMED	-1.03772	2.56198e-35
Glyma.12G238300.Wm82.a4.v1	-	-2.30871	0.00163854
Glyma.05G156300.Wm82.a4.v1	(1 of 2) PTHR21266:SF25 - PROTOCHLOROPHYLLIDE-DEPENDENT TRANSLOCON COMPONENT 52, CHLOROPLASTIC	-1.34565	0.000602934
Glyma.20G131100.Wm82.a4.v1	(1 of 2) PTHR23201//PTHR23201:SF15 - EXTENSIN, PROLINE-RICH PROTEIN // GIBBERELLIN-REGULATED PROTEIN 7	-1.30552	1.30512e-07
Glyma.09G201000.Wm82.a4.v1	(1 of 79) PF02701 - Dof domain, zinc finger (zf-Dof)	-1.67987	0.00513209
Glyma.04G235400.Wm82.a4.v1	(1 of 3) PTHR32295:SF33 - PROTEIN IQ-DOMAIN 21	-2.2358	4.74402e-75
Glyma.06G235900.Wm82.a4.v1	(1 of 5) K00815 - tyrosine aminotransferase (TAT)	-4.33431	0
Glyma.16G044900.Wm82.a4.v1	(1 of 4) 1.2.1.12//1.2.1.13 - Glyceraldehyde-3-phosphate dehydrogenase (phosphorylating) / Triosephosphate dehydrogenase // Glyceraldehyde-3-phosphate dehydrogenase (NADP(+)) (phosphorylating) / Triosephosphate dehydrogenase (NADP+)	-2.03902	3.02019e-15
Glyma.03G227600.Wm82.a4.v1	(1 of 12) PTHR21562:SF5 - PECTINACETYLESTERASE FAMILY PROTEIN	-1.59527	3.82612e-12
Glyma.04G011900.Wm82.a4.v1	(1 of 4) PTHR22572:SF111 - GLUCOSE-1-PHOSPHATE ADENYLYLTRANSFERASE LARGE SUBUNIT 3, CHLOROPLASTIC-RELATED	-1.00748	1.51876e-09
Glyma.05G069400.Wm82.a4.v1	(1 of 21) PF16913 - Purine nucleobase transmembrane transport (PUNUT)	-5.31379	0.000241126
Glyma.10G139700.Wm82.a4.v1	(1 of 8) PTHR31238//PTHR31238:SF39 - FAMILY NOT NAMED // GERMIN-LIKE PROTEIN SUBFAMILY 2 MEMBER 1-RELATED	-1.59768	9.0315e-46
Glyma.19G140100.Wm82.a4.v1	(1 of 10) PF00560//PF07714//PF13855 - Leucine Rich Repeat (LRR_1) // Protein tyrosine kinase (Pkinase_Tyr) // Leucine rich repeat (LRR_8)	-1.20393	9.34662e-15
Glyma.10G256200.Wm82.a4.v1	(1 of 2) PTHR10177//PTHR10177:SF224 - CYCLINE // SUBFAMILY NOT NAMED	-1.15397	4.42601e-09
Glyma.04G112800.Wm82.a4.v1	(1 of 2) K08905 - photosystem I subunit V (psaG)	-1.13773	5.39609e-10
Glyma.14G085600.Wm82.a4.v1	(1 of 3) PTHR12411//PTHR12411:SF352 - CYSTEINE PROTEASE FAMILY C1-RELATED // SUBFAMILY NOT NAMED	-2.64978	1.6607e-07
Glyma.04G185100.Wm82.a4.v1	(1 of 6) PTHR11850//PTHR11850:SF101 - HOMEOBOX PROTEIN TRANSCRIPTION FACTORS // SUBFAMILY NOT NAMED	-1.78869	0.00193988
Glyma.06G021700.Wm82.a4.v1	(1 of 5) PTHR31867//PTHR31867:SF4 - FAMILY NOT NAMED // EXPANSIN-A11	-2.58981	4.0522e-06
Glyma.11G196600.Wm82.a4.v1	(1 of 5) PTHR18952//PTHR18952:SF111 - CARBONIC ANHYDRASE // ALPHA CARBONIC ANHYDRASE 3	-4.06862	0.000619883
Glyma.15G176500.Wm82.a4.v1	(1 of 22) PF08879//PF08880 - WRC (WRC) // QLQ (QLQ)	-1.00961	0.000183677
Glyma.11G141300.Wm82.a4.v1	(1 of 2) PTHR10366//PTHR10366:SF473 - NAD DEPENDENT EPIMERASE/DEHYDRATASE // SUBFAMILY NOT NAMED	-1.50139	1.72346e-06
Glyma.12G171700.Wm82.a4.v1	(1 of 3) PTHR10593//PTHR10593:SF45 - SERINE/THREONINE-PROTEIN KINASE RIO // SUBFAMILY NOT NAMED	-1.107	9.12862e-09
Glyma.13G283200.Wm82.a4.v1	(1 of 4) PF00069//PF00954//PF01453//PF07714//PF08276 - Protein kinase domain (Pkinase) // S-locus glycoprotein domain (S_locus_glycop) // D-mannose binding lectin (B_lectin) // Protein tyrosine kinase (Pkinase_Tyr) // PAN-like domain (PAN_2)	-1.00843	4.45409e-13
Glyma.02G287100.Wm82.a4.v1	-	-1.43383	0.000935959
Glyma.11G213500.Wm82.a4.v1	(1 of 13) PTHR14326 - TARGETING PROTEIN FOR XKLP2	-1.31538	1.32571e-36
Glyma.19G092000.Wm82.a4.v1	(1 of 3) PTHR23086:SF39 - PHOSPHATIDYLINOSITOL 4-PHOSPHATE 5-KINASE 3	-3.29147	0.00179342
Glyma.07G001800.Wm82.a4.v1	(1 of 20) K14684 - solute carrier family 25 (mitochondrial phosphate transporter), member 23/24/25/41 (SLC25A23S)	-1.59501	0.000177435
Glyma.01G191200.Wm82.a4.v1	(1 of 6) PTHR10992:SF776 - ESTERASE KAI2-RELATED	-1.11172	0.000597649
Glyma.05G233900.Wm82.a4.v1	(1 of 4) PTHR24115:SF477 - KINESIN-LIKE PROTEIN-RELATED	-3.15441	0.000205324
Glyma.17G146500.Wm82.a4.v1	(1 of 4) PTHR23291//PTHR23291:SF34 - BAX INHIBITOR-RELATED // BAX INHIBITOR 1	-2.45427	3.82872e-15
Glyma.12G027100.Wm82.a4.v1	(1 of 8) PTHR11017//PTHR11017:SF167 - LEUCINE-RICH REPEAT-CONTAINING PROTEIN // SUBFAMILY NOT NAMED	-3.42645	9.4828e-16
Glyma.06G276400.Wm82.a4.v1	(1 of 19) 1.13.11.19 - Cysteamine dioxygenase / Persulfurase	-1.33979	1.36394e-18
Glyma.06G074100.Wm82.a4.v1	(1 of 7) PTHR31970:SF3 - MOLYBDATE TRANSPORTER 1	-1.12433	2.70913e-09
Glyma.01G229800.Wm82.a4.v1	(1 of 14) PTHR17130 - MITOCHONDRIAL OUTER MEMBRANE PROTEIN 25	-1.05986	9.07871e-05
Glyma.06G255700.Wm82.a4.v1	(1 of 7) PTHR10891//PTHR10891:SF585 - EF-HAND CALCIUM-BINDING DOMAIN CONTAINING PROTEIN // SUBFAMILY NOT NAMED	-1.7277	1.29956e-07
Glyma.17G245200.Wm82.a4.v1	(1 of 3) PTHR10641//PTHR10641:SF611 - MYB-LIKE DNA-BINDING PROTEIN MYB // SUBFAMILY NOT NAMED	-1.14615	2.65404e-05
Glyma.10G293500.Wm82.a4.v1	(1 of 2) 2.2.1.1//2.2.1.2 - Transketolase / Glycoaldehyde transferase // Transaldolase / Glycerone transferase	-1.50823	1.696e-09
Glyma.08G359300.Wm82.a4.v1	(1 of 6) PTHR11709//PTHR11709:SF70 - MULTI-COPPER OXIDASE // SUBFAMILY NOT NAMED	-1.14588	8.69537e-07
Glyma.08G044200.Wm82.a4.v1	(1 of 6) PF00069//PF14380 - Protein kinase domain (Pkinase) // Wall-associated receptor kinase C-terminal (WAK_assoc)	-3.3089	1.25543e-06
Glyma.04G187900.Wm82.a4.v1	(1 of 2) PTHR10774//PTHR10774:SF94 - EXTENDED SYNAPTOTAGMIN-RELATED // SUBFAMILY NOT NAMED	-2.79183	0.00173675
Glyma.02G111100.Wm82.a4.v1	-	-1.25228	0.000527042
Glyma.20G156000.Wm82.a4.v1	(1 of 4) PTHR10108//PTHR10108:SF861 - METHYLTRANSFERASE // SUBFAMILY NOT NAMED	-3.11636	0.0038557
Glyma.06G020600.Wm82.a4.v1	(1 of 4) PTHR23504:SF36 - MAJOR FACILITATOR PROTEIN	-1.75924	0.00180377
Glyma.06G019100.Wm82.a4.v1	(1 of 60) PF03087 - Arabidopsis protein of unknown function (DUF241)	-1.59912	0.00119828
Glyma.10G136700.Wm82.a4.v1	(1 of 273) PF00646 - F-box domain (F-box)	-4.85553	2.32706e-16
Glyma.14G004000.Wm82.a4.v1	(1 of 1) PTHR36343//PTHR36343:SF1 - FAMILY NOT NAMED // EXPRESSED PROTEIN	-2.54453	0.00482238
Glyma.15G228000.Wm82.a4.v1	-	-3.3814	0.00922169
Glyma.13G247000.Wm82.a4.v1	(1 of 36) PF12609 - Wound-induced protein (DUF3774)	-1.26538	0.00274987
Glyma.13G213200.Wm82.a4.v1	(1 of 10) K08145 - MFS transporter, SP family, solute carrier family 2 (facilitated glucose transporter), member 8 (SLC2A8, GLUT8)	-2.20108	5.36253e-16
Glyma.02G286000.Wm82.a4.v1	(1 of 4) PTHR27001//PTHR27001:SF221 - FAMILY NOT NAMED // PROTEIN KINASE FAMILY PROTEIN	-1.04166	3.21549e-14
Glyma.11G174100.Wm82.a4.v1	(1 of 8) K10257 - omega-3 fatty acid desaturase (delta-15 desaturase) (FAD8, desB)	-1.22131	4.5226e-09
Glyma.19G033600.Wm82.a4.v1	(1 of 4) PTHR31673//PTHR31673:SF2 - FAMILY NOT NAMED // COBRA-LIKE PROTEIN 4	-1.01505	4.83563e-14
Glyma.03G105200.Wm82.a4.v1	(1 of 2) PTHR22884//PTHR22884:SF340 - SET DOMAIN PROTEINS // HISTONE-LYSINE N-METHYLTRANSFERASE SU(VAR)3-9-RELATED	-2.63039	8.04846e-09
Glyma.01G156700.Wm82.a4.v1	(1 of 7) 1.1.1.34 - Hydroxymethylglutaryl-CoA reductase (NADPH) / HMG-CoA reductase	-1.64852	3.48785e-55
Glyma.19G179800.Wm82.a4.v1	(1 of 16) PF07939 - Protein of unknown function (DUF1685) (DUF1685)	-1.74377	0.000662726
Glyma.04G171800.Wm82.a4.v1	(1 of 3) PTHR24064//PTHR24064:SF242 - FAMILY NOT NAMED // ORGANIC CATION/CARNITINE TRANSPORTER 3	-1.75822	0.000648299
Glyma.02G027400.Wm82.a4.v1	(1 of 8) PTHR26402:SF526 - TWO-COMPONENT RESPONSE REGULATOR ARR15-RELATED	-1.76375	4.95144e-09
Glyma.12G174700.Wm82.a4.v1	(1 of 2) PTHR11132//PTHR11132:SF115 - SOLUTE CARRIER FAMILY 35 // SUBFAMILY NOT NAMED	-1.352	4.02717e-33
Glyma.19G002900.Wm82.a4.v1	(1 of 4) PTHR31079:SF2 - F4P13.14 PROTEIN-RELATED	-2.21669	3.25808e-13
Glyma.10G047800.Wm82.a4.v1	(1 of 1) PTHR22957//PTHR22957:SF328 - TBC1 DOMAIN FAMILY MEMBER GTPASE-ACTIVATING PROTEIN // RABGAP/TBC DOMAIN-CONTAINING PROTEIN	-1.05885	7.20583e-13
Glyma.13G090600.Wm82.a4.v1	-	-1.53302	1.84968e-05
Glyma.08G200100.Wm82.a4.v1	(1 of 5) PTHR31284//PTHR31284:SF7 - FAMILY NOT NAMED // ACID PHOSPHATASE-RELATED	-1.18896	1.49774e-24
Glyma.04G022900.Wm82.a4.v1	(1 of 12) PTHR22835:SF184 - GDSL ESTERASE/LIPASE EXL1-RELATED	-4.39483	0.000160513
Glyma.04G188100.Wm82.a4.v1	(1 of 1) PTHR11926//PTHR11926:SF378 - GLUCOSYL/GLUCURONOSYL TRANSFERASES // SUBFAMILY NOT NAMED	-1.06983	2.37107e-09
Glyma.04G064500.Wm82.a4.v1	-	-1.1609	3.87576e-18
Glyma.08G166600.Wm82.a4.v1	(1 of 17) PTHR13683:SF298 - ASPARTIC PROTEINASE CDR1-RELATED	-4.4325	0.0099562
Glyma.05G192500.Wm82.a4.v1	(1 of 171) PF02365 - No apical meristem (NAM) protein (NAM)	-3.43403	0.00840405
Glyma.20G212900.Wm82.a4.v1	(1 of 4) K08916 - light-harvesting complex II chlorophyll a/b binding protein 5 (LHCB5)	-1.33273	0.00175587
Glyma.07G117500.Wm82.a4.v1	(1 of 7) KOG4029 - Transcription factor HAND2/Transcription factor TAL1/TAL2/LYL1	-1.13517	1.80057e-05
Glyma.02G222600.Wm82.a4.v1	(1 of 4) PTHR22814//PTHR22814:SF51 - COPPER TRANSPORT PROTEIN ATOX1-RELATED // HEAVY METAL TRANSPORT/DETOXIFICATION DOMAIN-CONTAINING PROTEIN	-1.08015	8.66061e-06
Glyma.12G222200.Wm82.a4.v1	(1 of 2) K00218 - protochlorophyllide reductase (E1.3.1.33, por)	-1.09372	9.12004e-32
Glyma.20G220000.Wm82.a4.v1	(1 of 4) PTHR10795//PTHR10795:SF394 - PROPROTEIN CONVERTASE SUBTILISIN/KEXIN // SUBFAMILY NOT NAMED	-7.19139	6.55821e-09
Glyma.04G089851.Wm82.a4.v1	(1 of 4) PTHR10579//PTHR10579:SF55 - CALCIUM-ACTIVATED CHLORIDE CHANNEL REGULATOR // SUBFAMILY NOT NAMED	-1.30476	1.53445e-18
Glyma.04G040600.Wm82.a4.v1	(1 of 4) PTHR14255//PTHR14255:SF11 - ATP-DEPENDENT PROTEASE CEREBLON // SUBFAMILY NOT NAMED	-2.38892	9.10154e-10
Glyma.15G055900.Wm82.a4.v1	-	-2.99238	2.65547e-23
Glyma.02G064700.Wm82.a4.v1	(1 of 2) K08907 - light-harvesting complex I chlorophyll a/b binding protein 1 (LHCA1)	-1.11786	5.47998e-11
Glyma.13G228200.Wm82.a4.v1	(1 of 2) PTHR31933:SF2 - O-FUCOSYLTRANSFERASE-LIKE PROTEIN	-1.08977	4.38513e-08
Glyma.07G073800.Wm82.a4.v1	(1 of 11) K15095 - (+)-neomenthol dehydrogenase (E1.1.1.208)	-1.37828	0.000239462
Glyma.09G282700.Wm82.a4.v1	(1 of 3) K15402 - fatty acid omega-hydroxylase (CYP86B1)	-3.30416	8.78278e-06
Glyma.16G045100.Wm82.a4.v1	(1 of 6) PTHR31062//PTHR31062:SF15 - FAMILY NOT NAMED // XYLOGLUCAN ENDOTRANSGLUCOSYLASE/HYDROLASE PROTEIN 4-RELATED	-3.09664	7.62745e-149
Glyma.13G353300.Wm82.a4.v1	(1 of 3) K04485 - DNA repair protein RadA/Sms (sms, radA)	-1.33684	0.000765862
Glyma.10G205700.Wm82.a4.v1	-	-1.01324	0.00700613
Glyma.15G143700.Wm82.a4.v1	(1 of 2) PTHR30620//PTHR30620:SF50 - PERIPLASMIC BETA-GLUCOSIDASE-RELATED // BETA-D-XYLOSIDASE 1	-1.14234	1.2616e-91
Glyma.19G120400.Wm82.a4.v1	(1 of 4) 2.3.3.13//2.3.3.14 - 2-isopropylmalate synthase / Isopropylmalate synthetase // Homocitrate synthase / Homocitrate synthetase	-9.58867	7.33621e-16
Glyma.14G189500.Wm82.a4.v1	(1 of 4) PTHR22814//PTHR22814:SF51 - COPPER TRANSPORT PROTEIN ATOX1-RELATED // HEAVY METAL TRANSPORT/DETOXIFICATION DOMAIN-CONTAINING PROTEIN	-1.49814	1.41721e-08
Glyma.17G073400.Wm82.a4.v1	(1 of 6) PTHR33021//PTHR33021:SF8 - FAMILY NOT NAMED // EARLY NODULIN-LIKE PROTEIN 1-RELATED	-5.29637	1.26934e-14
Glyma.09G070500.Wm82.a4.v1	(1 of 2) PTHR10426//PTHR10426:SF35 - STRICTOSIDINE SYNTHASE-RELATED // SUBFAMILY NOT NAMED	-2.60014	0.00150386
Glyma.19G022700.Wm82.a4.v1	(1 of 50) PTHR11017//PTHR11017:SF171 - LEUCINE-RICH REPEAT-CONTAINING PROTEIN // SUBFAMILY NOT NAMED	-1.07162	0.000117334
Glyma.01G189000.Wm82.a4.v1	(1 of 4) PTHR31444//PTHR31444:SF8 - FAMILY NOT NAMED // PROTEIN IRREGULAR XYLEM 15-RELATED	-1.03136	2.33698e-12
Glyma.10G138300.Wm82.a4.v1	(1 of 176) PF03106 - WRKY DNA -binding domain (WRKY)	-1.52668	4.07008e-51
Glyma.13G117000.Wm82.a4.v1	(1 of 12) PTHR21562:SF5 - PECTINACETYLESTERASE FAMILY PROTEIN	-1.21579	8.21783e-14
Glyma.04G212300.Wm82.a4.v1	(1 of 4) PTHR22849//PTHR22849:SF34 - WDSAM1 PROTEIN // SUBFAMILY NOT NAMED	-1.07373	2.25676e-12
Glyma.02G146700.Wm82.a4.v1	(1 of 30) PF05910 - Plant protein of unknown function (DUF868) (DUF868)	-1.28513	0.000162393
Glyma.17G139700.Wm82.a4.v1	(1 of 1) PF07172//PF14547 - Glycine rich protein family (GRP) // Hydrophobic seed protein (Hydrophob_seed)	-2.01903	0
Glyma.14G078400.Wm82.a4.v1	(1 of 6) PTHR16092 - SEC3/SYNTAXIN-RELATED	-1.84675	0.0038641
Glyma.14G086200.Wm82.a4.v1	(1 of 4) PTHR10177//PTHR10177:SF242 - CYCLINE // SUBFAMILY NOT NAMED	-1.86152	0.00418596
Glyma.18G030400.Wm82.a4.v1	(1 of 2) 3.1.3.37 - Sedoheptulose-bisphosphatase / Sedoheptulose-1,7-bisphosphatase	-1.16884	0.000208793
Glyma.12G157500.Wm82.a4.v1	(1 of 2) PTHR31104//PTHR31104:SF1 - FAMILY NOT NAMED // GENOMIC DNA, CHROMOSOME 3, TAC CLONE:K15M2	-1.19099	7.14023e-05
Glyma.08G251800.Wm82.a4.v1	(1 of 27) PF07734 - F-box associated (FBA_1)	-9.82884	1.20986e-16
Glyma.10G251000.Wm82.a4.v1	-	-1.15055	2.3473e-21
Glyma.18G291700.Wm82.a4.v1	(1 of 11) PTHR22814//PTHR22814:SF47 - COPPER TRANSPORT PROTEIN ATOX1-RELATED // SUBFAMILY NOT NAMED	-1.26451	1.89401e-05
Glyma.02G205600.Wm82.a4.v1	(1 of 6) PTHR19375:SF229 - HEAT SHOCK 70 KDA PROTEIN 5	-1.96165	0.00949184
Glyma.13G262400.Wm82.a4.v1	(1 of 3) PTHR31044:SF19 - CARBOHYDRATE-BINDING X8 DOMAIN-CONTAINING PROTEIN-RELATED	-1.06679	1.68987e-08
Glyma.20G231800.Wm82.a4.v1	(1 of 4) PTHR11969//PTHR11969:SF26 - MAX DIMERIZATION, MAD // TRANSCRIPTION FACTOR BHLH99	-1.27361	7.51181e-22
Glyma.04G039600.Wm82.a4.v1	(1 of 4) PTHR10015:SF159 - HEAT STRESS TRANSCRIPTION FACTOR B-4	-1.0703	8.34372e-06
Glyma.05G222400.Wm82.a4.v1	(1 of 3) PTHR10209//PTHR10209:SF103 - OXIDOREDUCTASE, 2OG-FE II OXYGENASE FAMILY PROTEIN // SUBFAMILY NOT NAMED	-1.00897	1.72588e-17
Glyma.19G164300.Wm82.a4.v1	(1 of 3) PTHR24064//PTHR24064:SF279 - FAMILY NOT NAMED // MAJOR FACILITATOR PROTEIN-RELATED	-1.53987	2.66667e-09
Glyma.14G003400.Wm82.a4.v1	(1 of 2) K08909 - light-harvesting complex I chlorophyll a/b binding protein 3 (LHCA3)	-1.0506	4.50936e-14
Glyma.01G037100.Wm82.a4.v1	(1 of 3) 3.4.24.65 - Macrophage elastase / Metalloelastase	-8.31667	5.31052e-12
Glyma.07G125500.Wm82.a4.v1	(1 of 2) PTHR12626//PTHR12626:SF5 - PROGRAMMED CELL DEATH 4 // SUBFAMILY NOT NAMED	-1.0914	3.6649e-31
Glyma.08G038600.Wm82.a4.v1	(1 of 4) PTHR23023//PTHR23023:SF108 - DIMETHYLANILINE MONOOXYGENASE // SUBFAMILY NOT NAMED	-4.08894	2.37519e-12
Glyma.09G154700.Wm82.a4.v1	(1 of 4) K08916 - light-harvesting complex II chlorophyll a/b binding protein 5 (LHCB5)	-1.12999	7.29702e-08
Glyma.08G230400.Wm82.a4.v1	(1 of 37) PF00407 - Pathogenesis-related protein Bet v I family (Bet_v_1)	-1.3728	6.10646e-55
Glyma.12G208600.Wm82.a4.v1	(1 of 6) K19038 - E3 ubiquitin-protein ligase ATL41 [EC:6.3.2.19] (ATL41)	-2.37725	0.00543372
Glyma.12G136100.Wm82.a4.v1	(1 of 4) PTHR32116//PTHR32116:SF24 - FAMILY NOT NAMED // GALACTURONOSYLTRANSFERASE 12-RELATED	-1.31862	2.64289e-11
Glyma.10G071700.Wm82.a4.v1	(1 of 5) PTHR22952:SF217 - PROTEIN ABSCISIC ACID-INSENSITIVE 5	-1.20607	0.00127954
Glyma.20G041333.Wm82.a4.v1	(1 of 39) PTHR23155//PTHR23155:SF592 - LEUCINE-RICH REPEAT-CONTAINING PROTEIN // SUBFAMILY NOT NAMED	-1.13953	0.00899638
Glyma.14G193400.Wm82.a4.v1	(1 of 14) K07300 - Ca2+:H+ antiporter (chaA, CAX)	-2.05837	1.13754e-11
Glyma.02G204500.Wm82.a4.v1	(1 of 6) PTHR33021//PTHR33021:SF8 - FAMILY NOT NAMED // EARLY NODULIN-LIKE PROTEIN 1-RELATED	-7.32091	1.79464e-12
Glyma.01G152100.Wm82.a4.v1	(1 of 4) PTHR33101:SF2 - ROP GUANINE NUCLEOTIDE EXCHANGE FACTOR 14	-1.35419	4.83125e-104
Glyma.13G127200.Wm82.a4.v1	(1 of 2) K08903 - photosystem II 13kDa protein (psb28)	-1.15265	1.38519e-05
Glyma.05G068800.Wm82.a4.v1	(1 of 157) PF04043 - Plant invertase/pectin methylesterase inhibitor (PMEI)	-1.50333	0.00532882
Glyma.18G137500.Wm82.a4.v1	(1 of 2) PTHR31062:SF25 - XYLOGLUCAN ENDOTRANSGLUCOSYLASE/HYDROLASE PROTEIN 33-RELATED	-2.19436	1.80325e-40
Glyma.19G014800.Wm82.a4.v1	(1 of 150) KOG0156 - Cytochrome P450 CYP2 subfamily	-1.33638	7.42299e-15
Glyma.12G086100.Wm82.a4.v1	(1 of 16) PF07876 - Stress responsive A/B Barrel Domain (Dabb)	-2.53076	8.26494e-09
Glyma.11G208500.Wm82.a4.v1	(1 of 3) PTHR14445//PTHR14445:SF39 - GRB10 INTERACTING GYF PROTEIN // SWIB/MDM2, PLUS-3 AND GYF DOMAIN-CONTAINING PROTEIN-RELATED	-1.34374	1.41743e-12
Glyma.07G174900.Wm82.a4.v1	-	-1.37713	5.91407e-08
Glyma.08G229100.Wm82.a4.v1	(1 of 2227) 2.7.11.1 - Non-specific serine/threonine protein kinase / Threonine-specific protein kinase	-1.47219	8.17072e-78
Glyma.02G299800.Wm82.a4.v1	-	-1.09964	0.0085395
Glyma.19G041800.Wm82.a4.v1	(1 of 112) PF13839//PF14416 - GDSL/SGNH-like Acyl-Esterase family found in Pmr5 and Cas1p (PC-Esterase) // PMR5 N terminal Domain (PMR5N)	-1.59136	5.81672e-05
Glyma.13G030300.Wm82.a4.v1	(1 of 8) PTHR11771//PTHR11771:SF42 - LIPOXYGENASE // PROTEIN C13C4.7	-1.97983	6.5611e-28
Glyma.08G162400.Wm82.a4.v1	(1 of 17) PTHR13683:SF298 - ASPARTIC PROTEINASE CDR1-RELATED	-8.89489	6.56085e-14
Glyma.03G181300.Wm82.a4.v1	(1 of 4) PTHR31223//PTHR31223:SF17 - FAMILY NOT NAMED // CYTOKININ RIBOSIDE 5'-MONOPHOSPHATE PHOSPHORIBOHYDROLASE LOG3-RELATED	-1.77536	0.000281512
Glyma.07G219000.Wm82.a4.v1	(1 of 2) PTHR10772//PTHR10772:SF9 - 10 KDA HEAT SHOCK PROTEIN // GROES-LIKE PROTEIN	-1.05225	0.000330826
Glyma.15G005600.Wm82.a4.v1	-	-4.45005	1.83492e-06
Glyma.05G085700.Wm82.a4.v1	(1 of 4) PTHR31444//PTHR31444:SF8 - FAMILY NOT NAMED // PROTEIN IRREGULAR XYLEM 15-RELATED	-1.00558	2.49739e-19
Glyma.01G164500.Wm82.a4.v1	(1 of 31) PF04783 - Protein of unknown function (DUF630) (DUF630)	-1.30661	0.000407692
Glyma.20G185233.Wm82.a4.v1	-	-1.35118	9.44929e-10
Glyma.09G241600.Wm82.a4.v1	(1 of 3) PTHR23070//PTHR23070:SF5 - BCS1 AAA-TYPE ATPASE // AAA-TYPE ATPASE FAMILY PROTEIN-RELATED	-3.11017	3.51923e-05
Glyma.14G150900.Wm82.a4.v1	(1 of 4) PTHR31580:SF2 - FILAMENT-LIKE PLANT PROTEIN 1-RELATED	-1.12067	4.47584e-15
Glyma.02G157900.Wm82.a4.v1	-	-1.61332	2.62718e-26
Glyma.09G241800.Wm82.a4.v1	(1 of 2) PTHR24326:SF269 - HOMEOBOX-LEUCINE ZIPPER PROTEIN ATHB-4	-1.54108	3.3387e-06
Glyma.18G301100.Wm82.a4.v1	(1 of 8) PTHR10791//PTHR10791:SF34 - RAG1-ACTIVATING PROTEIN 1 // BIDIRECTIONAL SUGAR TRANSPORTER SWEET15	-1.45241	6.52791e-09
Glyma.16G020100.Wm82.a4.v1	(1 of 8) 1.1.3.37//1.1.3.8 - D-arabinono-1,4-lactone oxidase / D-arabinono-gamma-lactone oxidase // L-gulonolactone oxidase / L-gulono-gamma-lactone oxidase	-1.08773	1.56512e-19
Glyma.13G304400.Wm82.a4.v1	(1 of 4) PTHR31062:SF11 - XYLOGLUCAN ENDOTRANSGLUCOSYLASE/HYDROLASE PROTEIN 9	-1.3028	2.33701e-39
Glyma.01G215600.Wm82.a4.v1	(1 of 4) PTHR14237//PTHR14237:SF29 - MOLYBDOPTERIN COFACTOR SULFURASE MOSC // SUBFAMILY NOT NAMED	-4.69147	0.00337691
Glyma.01G039600.Wm82.a4.v1	(1 of 120) PF00560//PF08263//PF13855 - Leucine Rich Repeat (LRR_1) // Leucine rich repeat N-terminal domain (LRRNT_2) // Leucine rich repeat (LRR_8)	-1.02243	0.00234562
Glyma.09G233800.Wm82.a4.v1	(1 of 349) PF00847 - AP2 domain (AP2)	-2.2868	4.3543e-14
Glyma.17G164200.Wm82.a4.v1	(1 of 2) PTHR33922:SF4 - EXPRESSED PROTEIN	-3.05105	4.8533e-06
Glyma.19G227800.Wm82.a4.v1	(1 of 6) 2.4.1.123 - Inositol 3-alpha-galactosyltransferase / UDP-alpha-D-galactose:myo-inositol 3-alpha-D-galactosyltransferase	-2.22937	3.06361e-07
Glyma.03G049800.Wm82.a4.v1	(1 of 4) PTHR32285:SF11 - PROTEIN TRICHOME BIREFRINGENCE-LIKE 34	-1.21299	3.08957e-11
Glyma.05G230200.Wm82.a4.v1	(1 of 5) PTHR10460//PTHR10460:SF11 - ABL INTERACTOR // SUBFAMILY NOT NAMED	-2.71698	2.74397e-14
Glyma.12G121700.Wm82.a4.v1	(1 of 9) PTHR11709:SF103 - LACCASE-16	-1.44569	1.059e-05
Glyma.15G096200.Wm82.a4.v1	(1 of 6) PTHR23244//PTHR23244:SF308 - KELCH REPEAT DOMAIN // KELCH REPEAT-CONTAINING PROTEIN	-1.43329	6.56275e-07
Glyma.03G259200.Wm82.a4.v1	(1 of 4) PTHR24073//PTHR24073:SF345 - FAMILY NOT NAMED // RAS-RELATED PROTEIN RABA3	-1.02455	0.00101574
Glyma.06G143300.Wm82.a4.v1	(1 of 7) PTHR31867:SF22 - EXPANSIN-A8	-1.17548	3.99993e-48
Glyma.16G116100.Wm82.a4.v1	(1 of 51) PF14309 - Domain of unknown function (DUF4378) (DUF4378)	-1.42715	3.60831e-08
Glyma.06G231300.Wm82.a4.v1	(1 of 1) PTHR32285//PTHR32285:SF66 - FAMILY NOT NAMED // PROTEIN TRICHOME BIREFRINGENCE-LIKE 31	-1.84018	2.71135e-13
Glyma.15G100400.Wm82.a4.v1	(1 of 7) PTHR14859 - CALCOFLUOR WHITE HYPERSENSITIVE PROTEIN PRECURSOR	-1.33502	1.77491e-08
Glyma.15G111900.Wm82.a4.v1	(1 of 4) PTHR11850//PTHR11850:SF100 - HOMEOBOX PROTEIN TRANSCRIPTION FACTORS // HOMEOBOX PROTEIN SHOOT MERISTEMLESS	-2.83815	0.00324966
Glyma.17G159800.Wm82.a4.v1	-	-1.12458	3.5325e-05
Glyma.18G130900.Wm82.a4.v1	(1 of 8) PTHR26402:SF526 - TWO-COMPONENT RESPONSE REGULATOR ARR15-RELATED	-1.37824	3.13257e-13
Glyma.08G211100.Wm82.a4.v1	(1 of 2) PTHR10374//PTHR10374:SF18 - LACTOYLGLUTATHIONE LYASE GLYOXALASE I // SUBFAMILY NOT NAMED	-1.10472	0.0093134
Glyma.17G176700.Wm82.a4.v1	-	-4.59262	6.946e-07
Glyma.12G010100.Wm82.a4.v1	(1 of 6) PTHR11802:SF66 - SERINE CARBOXYPEPTIDASE-LIKE 36-RELATED	-1.52718	5.42995e-19
Glyma.03G058500.Wm82.a4.v1	(1 of 5) PTHR31503:SF1 - VACUOLAR CATION/PROTON EXCHANGER 1-RELATED	-4.79767	8.81424e-16
Glyma.02G057400.Wm82.a4.v1	(1 of 3) K00234 - succinate dehydrogenase (ubiquinone) flavoprotein subunit (SDHA, SDH1)	-1.14917	2.84757e-45
Glyma.16G175600.Wm82.a4.v1	(1 of 2) K13263 - isoflavone 7-O-glucosyltransferase (IF7GT)	-7.1391	1.23492e-08
Glyma.18G089800.Wm82.a4.v1	(1 of 3) K18848 - indole-3-acetate O-methyltransferase (IAMT1)	-1.20717	0.00486365
Glyma.04G180400.Wm82.a4.v1	(1 of 10) PTHR31236//PTHR31236:SF2 - FAMILY NOT NAMED // DEHYDRATION-RESPONSIVE PROTEIN RD22	-1.35331	0
Glyma.15G236900.Wm82.a4.v1	(1 of 8) PTHR23180:SF249 - ADP-RIBOSYLATION FACTOR GTPASE-ACTIVATING PROTEIN AGD11-RELATED	-4.78786	0.00229722
Glyma.18G217800.Wm82.a4.v1	(1 of 14) PF06697 - Protein of unknown function (DUF1191) (DUF1191)	-1.06403	7.34163e-06
Glyma.04G050800.Wm82.a4.v1	(1 of 3) PTHR11850:SF92 - HOMEOBOX PROTEIN ATH1	-4.62404	0.00118913
Glyma.12G217700.Wm82.a4.v1	(1 of 6) PTHR23050//PTHR23050:SF170 - CALCIUM BINDING PROTEIN // SUBFAMILY NOT NAMED	-1.2685	0.000156398
Glyma.15G241100.Wm82.a4.v1	(1 of 2) PTHR11746//PTHR11746:SF90 - O-METHYLTRANSFERASE // SUBFAMILY NOT NAMED	-2.66714	4.10893e-06
Glyma.04G086600.Wm82.a4.v1	(1 of 7) PTHR22950//PTHR22950:SF208 - AMINO ACID TRANSPORTER // SUBFAMILY NOT NAMED	-1.34731	0.00528268
Glyma.14G195600.Wm82.a4.v1	(1 of 5) PTHR31342:SF9 - F10K1.18 PROTEIN	-2.23028	8.95929e-05
Glyma.13G001200.Wm82.a4.v1	(1 of 3) K01761 - methionine-gamma-lyase (E4.4.1.11)	-2.76137	0.000168344
Glyma.11G081700.Wm82.a4.v1	(1 of 112) PF13839//PF14416 - GDSL/SGNH-like Acyl-Esterase family found in Pmr5 and Cas1p (PC-Esterase) // PMR5 N terminal Domain (PMR5N)	-1.64512	0.000260899
Glyma.14G031200.Wm82.a4.v1	(1 of 4) 2.5.1.18//2.5.1.32 - Glutathione transferase / S-(hydroxyalkyl)glutathione lyase // 15-cis-phytoene synthase / PSase	-2.18965	0.00336801
Glyma.07G013900.Wm82.a4.v1	(1 of 5) 1.13.99.1 - Inositol oxygenase / Myo-inositol oxygenase	-1.35098	7.59298e-32
Glyma.08G029400.Wm82.a4.v1	(1 of 12) PTHR12374//PTHR12374:SF19 - TRANSCRIPTIONAL ADAPTOR 2 ADA2 -RELATED // SUBFAMILY NOT NAMED	-1.89027	4.6619e-15
Glyma.03G199000.Wm82.a4.v1	(1 of 4) PTHR31140//PTHR31140:SF2 - FAMILY NOT NAMED // B3 DOMAIN-CONTAINING TRANSCRIPTION FACTOR VAL3	-1.51188	4.73316e-05
Glyma.20G239700.Wm82.a4.v1	(1 of 3) PTHR31407:SF10 - PSBP-LIKE PROTEIN 2, CHLOROPLASTIC	-1.13383	0.00455387
Glyma.14G012100.Wm82.a4.v1	(1 of 2) PTHR11132:SF38 - GB|AAF04433.1	-1.21425	0.000413831
Glyma.04G021600.Wm82.a4.v1	(1 of 5) PTHR31867//PTHR31867:SF4 - FAMILY NOT NAMED // EXPANSIN-A11	-1.45786	1.48449e-11
Glyma.17G050400.Wm82.a4.v1	(1 of 5) K03026 - DNA-directed RNA polymerase III subunit RPC4 (RPC4, POLR3D)	-1.462	3.47331e-09
Glyma.13G224400.Wm82.a4.v1	(1 of 4) PTHR11566//PTHR11566:SF45 - DYNAMIN // DYNAMIN-RELATED PROTEIN 4C-RELATED	-4.34355	5.56631e-56
Glyma.07G113200.Wm82.a4.v1	(1 of 17) KOG2722 - Predicted membrane protein	-8.46756	1.90051e-12
Glyma.19G237800.Wm82.a4.v1	(1 of 2) PTHR11130//PTHR11130:SF2 - GLUTATHIONE SYNTHETASE // SUBFAMILY NOT NAMED	-4.98312	0.000989842
Glyma.04G233500.Wm82.a4.v1	(1 of 2) PTHR14136:SF11 - THYLAKOID LUMENAL 17.4 KDA PROTEIN, CHLOROPLASTIC	-1.81025	0.00971196
Glyma.01G184600.Wm82.a4.v1	(1 of 20) PF04784//PF14389 - Protein of unknown function, DUF547 (DUF547) // Leucine-zipper of ternary complex factor MIP1 (Lzipper-MIP1)	-6.02816	5.83313e-06
Glyma.03G139900.Wm82.a4.v1	-	-1.05626	4.83501e-16
Glyma.06G159000.Wm82.a4.v1	-	-1.57245	6.6457e-08
Glyma.07G105000.Wm82.a4.v1	(1 of 2) K10732 - GINS complex subunit 1 (GINS1, PSF1)	-1.34614	0.00452371
Glyma.18G218700.Wm82.a4.v1	(1 of 1) PTHR31852//PTHR31852:SF3 - FAMILY NOT NAMED // LATE EMBRYOGENESIS ABUNDANT (LEA) HYDROXYPROLINE-RICH GLYCOPROTEIN FAMILY	-2.00983	1.32991e-11
Glyma.08G037200.Wm82.a4.v1	(1 of 2) PTHR11654//PTHR11654:SF58 - OLIGOPEPTIDE TRANSPORTER-RELATED // SUBFAMILY NOT NAMED	-5.14843	5.19002e-16
Glyma.08G200200.Wm82.a4.v1	(1 of 56) 3.1.3.2 - Acid phosphatase / Phosphomonoesterase	-1.06465	5.18031e-130
Glyma.08G112100.Wm82.a4.v1	(1 of 89) PF07983 - X8 domain (X8)	-1.56084	0.00724759
Glyma.08G012800.Wm82.a4.v1	(1 of 4) PTHR31775:SF5 - REMORIN FAMILY PROTEIN-RELATED	-10.4435	1.13901e-18
Glyma.04G008200.Wm82.a4.v1	(1 of 6) PTHR24115//PTHR24115:SF405 - FAMILY NOT NAMED // ATP BINDING MICROTUBULE MOTOR FAMILY PROTEIN	-1.01045	0.000496442
Glyma.06G084200.Wm82.a4.v1	(1 of 1) PTHR21234//PTHR21234:SF28 - PURINE NUCLEOSIDE PHOSPHORYLASE // SUBFAMILY NOT NAMED	-3.33968	2.88863e-33
Glyma.06G047700.Wm82.a4.v1	(1 of 1) K06129 - lysophospholipase III (LYPLA3)	-1.80723	3.73305e-05
Glyma.08G168000.Wm82.a4.v1	(1 of 154) K00430 - peroxidase (E1.11.1.7)	-1.43005	0.00788132
Glyma.08G174700.Wm82.a4.v1	(1 of 4) PTHR11260//PTHR11260:SF195 - GLUTATHIONE S-TRANSFERASE, GST, SUPERFAMILY, GST DOMAIN CONTAINING // SUBFAMILY NOT NAMED	-1.93722	9.05065e-07
Glyma.01G011300.Wm82.a4.v1	(1 of 99) PF01535//PF13041//PF14432 - PPR repeat (PPR) // PPR repeat family (PPR_2) // DYW family of nucleic acid deaminases (DYW_deaminase)	-1.94507	0.00530811
Glyma.13G363800.Wm82.a4.v1	(1 of 8) PF06232 - Embryo-specific protein 3, (ATS3) (ATS3)	-6.65984	1.72186e-07
Glyma.13G246600.Wm82.a4.v1	(1 of 12) K17871 - NADH:ubiquinone reductase (non-electrogenic) (ndh1)	-1.36023	3.7701e-23
Glyma.08G126800.Wm82.a4.v1	(1 of 6) PTHR19370//PTHR19370:SF120 - NADH-CYTOCHROME B5 REDUCTASE // FERREDOXIN-1, CHLOROPLASTIC-RELATED	-2.43215	8.13756e-12
Glyma.13G324900.Wm82.a4.v1	(1 of 2) PTHR11132//PTHR11132:SF115 - SOLUTE CARRIER FAMILY 35 // SUBFAMILY NOT NAMED	-1.37678	6.63446e-45
Glyma.06G187100.Wm82.a4.v1	(1 of 1) KOG1922 - Rho GTPase effector BNI1 and related formins	-5.74169	2.66273e-05
Glyma.05G166800.Wm82.a4.v1	(1 of 2) PTHR17130//PTHR17130:SF24 - MITOCHONDRIAL OUTER MEMBRANE PROTEIN 25 // GAN	-1.03012	0.00686973
Glyma.10G166100.Wm82.a4.v1	(1 of 25) PF04852 - Protein of unknown function (DUF640) (DUF640)	-1.47356	6.2645e-37
Glyma.07G075700.Wm82.a4.v1	(1 of 9) PTHR23155//PTHR23155:SF554 - LEUCINE-RICH REPEAT-CONTAINING PROTEIN // SUBFAMILY NOT NAMED	-1.72355	0.0017363
Glyma.08G007200.Wm82.a4.v1	(1 of 5) PTHR17130//PTHR17130:SF25 - MITOCHONDRIAL OUTER MEMBRANE PROTEIN 25 // SUBFAMILY NOT NAMED	-3.00292	0.00597801
Glyma.18G185900.Wm82.a4.v1	-	-6.84394	5.40106e-08
Glyma.02G132100.Wm82.a4.v1	(1 of 2) 1.7.7.1 - Ferredoxin--nitrite reductase	-1.37374	0.000456947
Glyma.19G226500.Wm82.a4.v1	(1 of 1) PTHR31375:SF13 - PECTIN LYASE-LIKE PROTEIN	-1.92278	0.00265341
Glyma.01G092300.Wm82.a4.v1	-	-1.15705	3.70854e-30
Glyma.19G030700.Wm82.a4.v1	(1 of 14) 2.3.1.115 - Isoflavone-7-O-beta-glucoside 6''-O-malonyltransferase / Flavone/flavonol 7-O-beta-D-glucoside malonyltransferase	-4.30029	1.28105e-07
Glyma.08G204800.Wm82.a4.v1	(1 of 4) K02695 - photosystem I subunit VI (psaH)	-2.26286	5.24849e-07
Glyma.07G266200.Wm82.a4.v1	(1 of 3) 3.1.3.25//3.1.3.93 - Inositol-phosphate phosphatase / Myo-inositol-1-phosphatase // L-galactose 1-phosphate phosphatase	-1.01382	0.00325957
Glyma.10G104700.Wm82.a4.v1	(1 of 3) PTHR11926//PTHR11926:SF227 - GLUCOSYL/GLUCURONOSYL TRANSFERASES // SUBFAMILY NOT NAMED	-1.01965	1.15878e-68
Glyma.18G049500.Wm82.a4.v1	(1 of 1) PTHR24282//PTHR24282:SF11 - CYTOCHROME P450 FAMILY MEMBER // SUBFAMILY NOT NAMED	-1.81526	1.10164e-45
Glyma.17G075300.Wm82.a4.v1	(1 of 3) K00131 - glyceraldehyde-3-phosphate dehydrogenase (NADP+) (gapN)	-1.06494	1.20912e-08
Glyma.03G226800.Wm82.a4.v1	(1 of 14) 1.14.13.173 - 11-oxo-beta-amyrin 30-oxidase / CYP72A154	-1.15221	3.46796e-08
Glyma.02G051900.Wm82.a4.v1	(1 of 4) PTHR31604//PTHR31604:SF3 - FAMILY NOT NAMED // PROTEIN SHI RELATED SEQUENCE 1-RELATED	-1.53057	0.00146362
Glyma.07G038800.Wm82.a4.v1	(1 of 57) PF07883 - Cupin domain (Cupin_2)	-2.66509	2.45041e-73
Glyma.20G159300.Wm82.a4.v1	(1 of 3) 6.2.1.8 - Oxalate--CoA ligase / Oxalyl-CoA synthetase	-1.7214	2.81538e-17
Glyma.07G164900.Wm82.a4.v1	-	-2.25617	0.000646834
Glyma.17G195900.Wm82.a4.v1	(1 of 4) KOG1163 - Casein kinase (serine/threonine/tyrosine protein kinase)	-5.84749	9.42889e-38
Glyma.10G104767.Wm82.a4.v1	(1 of 5) PTHR33101:SF1 - ROP GUANINE NUCLEOTIDE EXCHANGE FACTOR 7	-2.80472	3.98546e-13
Glyma.03G125200.Wm82.a4.v1	(1 of 2) PTHR11802//PTHR11802:SF97 - SERINE PROTEASE FAMILY S10 SERINE CARBOXYPEPTIDASE // SUBFAMILY NOT NAMED	-1.22632	0.000366716
Glyma.14G067000.Wm82.a4.v1	(1 of 3) PTHR32429:SF12 - RIBULOSE BISPHOSPHATE CARBOXYLASE/OXYGENASE ACTIVASE, CHLOROPLASTIC	-1.15844	3.12129e-20
Glyma.07G132400.Wm82.a4.v1	(1 of 4) PTHR10641:SF457 - TRANSCRIPTION FACTOR AS1	-1.11607	0.000494349
Glyma.19G192300.Wm82.a4.v1	(1 of 3) PTHR21654//PTHR21654:SF5 - FAMILY NOT NAMED // TRIHELIX TRANSCRIPTION FACTOR PTL	-1.61387	7.7307e-29
Glyma.18G029000.Wm82.a4.v1	(1 of 4) PTHR22950//PTHR22950:SF260 - AMINO ACID TRANSPORTER // SUBFAMILY NOT NAMED	-1.02785	2.09531e-15
Glyma.06G290700.Wm82.a4.v1	(1 of 2) PTHR32093//PTHR32093:SF36 - FAMILY NOT NAMED // EXTENSIN-LIKE PROTEIN	-1.35127	3.32691e-08
Glyma.11G181100.Wm82.a4.v1	(1 of 1) PTHR36311//PTHR36311:SF1 - FAMILY NOT NAMED // PHOTOSYSTEM I SUBUNIT O	-1.78591	6.59892e-07
Glyma.13G141700.Wm82.a4.v1	(1 of 1) PTHR36738:SF1 - EXPRESSED PROTEIN	-1.06483	6.4026e-10
Glyma.12G063900.Wm82.a4.v1	(1 of 4) PTHR24326//PTHR24326:SF203 - FAMILY NOT NAMED // WUSCHEL-RELATED HOMEOBOX 2	-2.73528	0.00103805
Glyma.03G040500.Wm82.a4.v1	-	-2.41409	2.68717e-29
Glyma.15G186500.Wm82.a4.v1	(1 of 4) PTHR31342:SF12 - F11A17.16	-1.22526	3.83127e-16
Glyma.04G167900.Wm82.a4.v1	(1 of 2) K08910 - light-harvesting complex I chlorophyll a/b binding protein 4 (LHCA4)	-1.15021	1.10307e-17
Glyma.06G008000.Wm82.a4.v1	(1 of 6) PTHR24115//PTHR24115:SF405 - FAMILY NOT NAMED // ATP BINDING MICROTUBULE MOTOR FAMILY PROTEIN	-1.74259	3.72414e-06
Glyma.13G286900.Wm82.a4.v1	(1 of 4) PTHR32116//PTHR32116:SF24 - FAMILY NOT NAMED // GALACTURONOSYLTRANSFERASE 12-RELATED	-1.07452	2.89337e-17
Glyma.08G056400.Wm82.a4.v1	(1 of 3) 1.11.1.7//3.1.3.2 - Peroxidase / Lactoperoxidase // Acid phosphatase / Phosphomonoesterase	-2.33419	0.00746779
Glyma.19G128400.Wm82.a4.v1	-	-1.45694	0.00154116
Glyma.17G117300.Wm82.a4.v1	(1 of 3) PTHR24351//PTHR24351:SF70 - RIBOSOMAL PROTEIN S6 KINASE // PROTEIN KINASE PINOID 2	-1.94102	4.33334e-14
Glyma.14G213300.Wm82.a4.v1	(1 of 1) PTHR20852//PTHR20852:SF59//PTHR20852:SF62 - GLUTAMINE SYNTHETASE // SUBFAMILY NOT NAMED // GLUTAMINE SYNTHETASE CYTOSOLIC ISOZYME 1-3-RELATED	-4.86463	5.70476e-31
Glyma.16G049000.Wm82.a4.v1	(1 of 2) PTHR36762:SF2 - A.THALIANA MRNA (ORF19) FROM CHROMOSOME III	-1.43501	1.99999e-05
Glyma.08G190700.Wm82.a4.v1	(1 of 7) PTHR24223//PTHR24223:SF108 - FAMILY NOT NAMED // ABC TRANSPORTER C FAMILY MEMBER 8	-6.52022	5.97136e-10
Glyma.10G121524.Wm82.a4.v1	(1 of 2) 1.7.3.3 - Factor independent urate hydroxylase / Uricase II	-2.29013	1.33911e-97
Glyma.12G176200.Wm82.a4.v1	-	-1.72073	1.06576e-43
Glyma.06G242900.Wm82.a4.v1	-	-1.48528	2.3721e-89
Glyma.10G147000.Wm82.a4.v1	(1 of 4) PTHR11850//PTHR11850:SF102 - HOMEOBOX PROTEIN TRANSCRIPTION FACTORS // SUBFAMILY NOT NAMED	-1.25915	2.29154e-05
Glyma.14G188950.Wm82.a4.v1	(1 of 3) PTHR11361:SF81 - DNA MISMATCH REPAIR PROTEIN MUTS, TYPE 2	-4.42737	0.00204887
Glyma.11G003100.Wm82.a4.v1	-	-2.09421	1.90179e-05
Glyma.03G187000.Wm82.a4.v1	(1 of 12) K13496 - UDP-glucosyl transferase 73C [EC:2.4.1.-] Glc - brassinosteroid (UGT73C)	-1.12576	4.2467e-16
Glyma.19G074000.Wm82.a4.v1	(1 of 8) PF02451 - Nodulin (Nodulin)	-10.5414	5.42566e-19
Glyma.20G209200.Wm82.a4.v1	(1 of 2) PTHR31165//PTHR31165:SF13 - FAMILY NOT NAMED // PROTEIN LIGHT-DEPENDENT SHORT HYPOCOTYLS 1-RELATED	-2.5545	1.0738e-12
Glyma.13G255800.Wm82.a4.v1	(1 of 8) 2.4.1.91 - Flavonol 3-O-glucosyltransferase / UDP-glucose flavonol 3-O-glucosyltransferase	-1.66251	3.69623e-12
Glyma.06G029600.Wm82.a4.v1	(1 of 8) PTHR22952//PTHR22952:SF182 - CAMP-RESPONSE ELEMENT BINDING PROTEIN-RELATED // SUBFAMILY NOT NAMED	-2.02705	4.3418e-05
Glyma.11G117200.Wm82.a4.v1	(1 of 20) PTHR24078:SF177 - PROTEIN DNJ-23-RELATED	-2.38258	0.000979458
Glyma.12G120600.Wm82.a4.v1	(1 of 3) PTHR24072//PTHR24072:SF167 - RHO FAMILY GTPASE // RAC-LIKE GTP-BINDING PROTEIN ARAC2	-1.19566	0.00215347
Glyma.18G078200.Wm82.a4.v1	(1 of 4) PTHR34947:SF2 - GENOMIC DNA, CHROMOSOME 3, P1 CLONE:MJG19	-1.2185	0.00593938
Glyma.09G198000.Wm82.a4.v1	(1 of 25) PF14309//PF14383 - Domain of unknown function (DUF4378) (DUF4378) // DUF761-associated sequence motif (VARLMGL)	-1.00809	2.96896e-06
Glyma.02G090100.Wm82.a4.v1	(1 of 3) PTHR11206//PTHR11206:SF167 - MULTIDRUG RESISTANCE PROTEIN // SUBFAMILY NOT NAMED	-2.62102	3.20291e-33
Glyma.14G052400.Wm82.a4.v1	-	-11.3442	7.62411e-22
Glyma.19G261000.Wm82.a4.v1	(1 of 20) PF07714//PF13947 - Protein tyrosine kinase (Pkinase_Tyr) // Wall-associated receptor kinase galacturonan-binding (GUB_WAK_bind)	-2.01861	1.40794e-06
Glyma.13G314200.Wm82.a4.v1	-	-3.31801	7.40401e-40
Glyma.10G205400.Wm82.a4.v1	-	-1.74509	9.063e-05
Glyma.11G235000.Wm82.a4.v1	(1 of 4) KOG4431 - Uncharacterized protein, induced by hypoxia	-3.65635	3.11464e-06
Glyma.07G086400.Wm82.a4.v1	(1 of 3) PTHR10015//PTHR10015:SF187 - HEAT SHOCK TRANSCRIPTION FACTOR // HEAT STRESS TRANSCRIPTION FACTOR C-1	-1.06623	1.90739e-09
Glyma.08G037000.Wm82.a4.v1	(1 of 2) PTHR22849//PTHR22849:SF13 - WDSAM1 PROTEIN // SUBFAMILY NOT NAMED	-1.68475	6.80878e-06
Glyma.19G138101.Wm82.a4.v1	(1 of 753) PF13041 - PPR repeat family (PPR_2)	-1.30937	0.00862947
Glyma.02G159900.Wm82.a4.v1	(1 of 1) PTHR19241//PTHR19241:SF283 - ATP-BINDING CASSETTE TRANSPORTER // SUBFAMILY NOT NAMED	-1.25657	1.03818e-144
Glyma.17G050200.Wm82.a4.v1	(1 of 22) PF08879//PF08880 - WRC (WRC) // QLQ (QLQ)	-1.88287	0.0050319
Glyma.06G020300.Wm82.a4.v1	(1 of 2) 4.1.1.17 - Ornithine decarboxylase / L-ornithine carboxy-lyase	-2.91271	6.43104e-103
Glyma.11G019100.Wm82.a4.v1	(1 of 9) PF00560//PF07714//PF08263 - Leucine Rich Repeat (LRR_1) // Protein tyrosine kinase (Pkinase_Tyr) // Leucine rich repeat N-terminal domain (LRRNT_2)	-1.36051	2.0127e-05
Glyma.02G299300.Wm82.a4.v1	(1 of 4) PTHR31321//PTHR31321:SF31 - FAMILY NOT NAMED // PECTINESTERASE QRT1	-4.92237	0.000244252
Glyma.19G022200.Wm82.a4.v1	(1 of 6) PTHR31948:SF12 - MINI ZINC FINGER PROTEIN 2	-1.02618	0.000730109
Glyma.20G193100.Wm82.a4.v1	(1 of 5) K02933 - large subunit ribosomal protein L6 (RP-L6, MRPL6, rplF)	-1.21774	6.21154e-05
Glyma.15G092900.Wm82.a4.v1	-	-1.6266	0.00101411
Glyma.05G050600.Wm82.a4.v1	(1 of 4) PTHR11850:SF74 - HOMEOBOX PROTEIN KNOTTED-1-LIKE 7	-1.02217	0.00132702
Glyma.18G225100.Wm82.a4.v1	(1 of 12) 1.10.3.1 - Catechol oxidase / Tyrosinase	-3.77153	1.76283e-75
Glyma.01G020900.Wm82.a4.v1	(1 of 12) K00083 - cinnamyl-alcohol dehydrogenase (E1.1.1.195)	-1.20149	5.84021e-07
Glyma.08G116100.Wm82.a4.v1	(1 of 25) PF04852 - Protein of unknown function (DUF640) (DUF640)	-1.35502	0.000265447
Glyma.16G057500.Wm82.a4.v1	(1 of 13) PTHR24015//PTHR24015:SF419 - FAMILY NOT NAMED // NUCLEOTIDE-DIPHOSPHO-SUGAR TRANSFERASE DOMAIN-CONTAINING PROTEIN-RELATED	-6.05298	1.23713e-08
Glyma.08G019900.Wm82.a4.v1	(1 of 2) PTHR21495//PTHR21495:SF49 - NUCLEOPORIN-RELATED // SUBFAMILY NOT NAMED	-1.23716	1.48865e-12
Glyma.15G251600.Wm82.a4.v1	(1 of 3) PTHR11260:SF204 - GLUTATHIONE S-TRANSFERASE U21-RELATED	-1.07954	3.72061e-17
Glyma.15G045000.Wm82.a4.v1	(1 of 8) PF02451 - Nodulin (Nodulin)	-10.1661	2.73738e-23
Glyma.16G172500.Wm82.a4.v1	(1 of 5) K05666 - ATP-binding cassette, subfamily C (CFTR/MRP), member 2 (ABCC2)	-1.11585	2.50474e-07
Glyma.06G286700.Wm82.a4.v1	(1 of 10) PTHR11746//PTHR11746:SF83 - O-METHYLTRANSFERASE // SUBFAMILY NOT NAMED	-1.80988	2.39263e-07
Glyma.16G130400.Wm82.a4.v1	(1 of 6) PTHR27000:SF26 - F10A5.16	-2.07412	9.13005e-05
Glyma.18G054000.Wm82.a4.v1	(1 of 7) PTHR31867:SF22 - EXPANSIN-A8	-1.03804	4.98466e-12
Glyma.11G133700.Wm82.a4.v1	(1 of 2) PTHR10641//PTHR10641:SF593 - MYB-LIKE DNA-BINDING PROTEIN MYB // SUBFAMILY NOT NAMED	-1.12402	9.10081e-06
Glyma.14G045000.Wm82.a4.v1	(1 of 5) PTHR30620//PTHR30620:SF51 - PERIPLASMIC BETA-GLUCOSIDASE-RELATED // BETA-D-GLUCAN EXOHYDROLASE-LIKE PROTEIN-RELATED	-1.04269	3.50079e-10
Glyma.10G060100.Wm82.a4.v1	(1 of 2) PTHR20852//PTHR20852:SF16 - GLUTAMINE SYNTHETASE // TYPE-1 GLUTAMINE SYNTHETASE 1	-7.4772	1.74896e-24
Glyma.09G236200.Wm82.a4.v1	(1 of 74) PF01357//PF03330 - Pollen allergen (Pollen_allerg_1) // Rare lipoprotein A (RlpA)-like double-psi beta-barrel (DPBB_1)	-1.17811	0.00137257
Glyma.08G028800.Wm82.a4.v1	(1 of 3) K01047 - secretory phospholipase A2 (PLA2G, SPLA2)	-1.09976	0.00246354
Glyma.07G093800.Wm82.a4.v1	(1 of 4) PTHR31042:SF16 - CORE-2/I-BRANCHING BETA-1,6-N-ACETYLGLUCOSAMINYLTRANSFERASE FAMILY PROTEIN	-2.86908	1.83408e-05
Glyma.18G241600.Wm82.a4.v1	(1 of 5) PTHR23177//PTHR23177:SF23 - MKIAA1688 PROTEIN // CRIB DOMAIN-CONTAINING PROTEIN RIC4	-1.05872	1.65961e-06
Glyma.06G296000.Wm82.a4.v1	(1 of 2) PTHR12771//PTHR12771:SF17 - ENGULFMENT AND CELL MOTILITY // SUBFAMILY NOT NAMED	-2.03454	0.000393578
Glyma.15G052400.Wm82.a4.v1	(1 of 3) K08917 - light-harvesting complex II chlorophyll a/b binding protein 6 (LHCB6)	-1.1517	3.34021e-08
Glyma.08G185800.Wm82.a4.v1	(1 of 24) PF04755 - PAP_fibrillin (PAP_fibrillin)	-1.68372	0.00505033
Glyma.15G275600.Wm82.a4.v1	(1 of 2) PTHR34940:SF1 - PHOTOSYSTEM II 5 KDA PROTEIN, CHLOROPLASTIC	-1.73057	4.3265e-07
Glyma.01G115600.Wm82.a4.v1	(1 of 65) PF03140 - Plant protein of unknown function (DUF247)	-1.16877	6.82091e-07
Glyma.19G159600.Wm82.a4.v1	(1 of 4) PTHR10593//PTHR10593:SF20 - SERINE/THREONINE-PROTEIN KINASE RIO // INDETERMINATE-DOMAIN 12 PROTEIN	-2.39916	5.50823e-10
Glyma.03G231000.Wm82.a4.v1	(1 of 4) PTHR23244//PTHR23244:SF294 - KELCH REPEAT DOMAIN // SUBFAMILY NOT NAMED	-1.17592	1.22963e-14
Glyma.17G002800.Wm82.a4.v1	(1 of 171) PF02365 - No apical meristem (NAM) protein (NAM)	-2.74995	2.74452e-35
Glyma.20G129200.Wm82.a4.v1	(1 of 3) PTHR27008:SF42 - LEUCINE-RICH REPEAT PROTEIN KINASE-LIKE PROTEIN	-1.01409	8.85159e-37
Glyma.03G157432.Wm82.a4.v1	(1 of 4) PTHR10593//PTHR10593:SF20 - SERINE/THREONINE-PROTEIN KINASE RIO // INDETERMINATE-DOMAIN 12 PROTEIN	-3.50344	5.01452e-13
Glyma.05G057200.Wm82.a4.v1	(1 of 34) PF14547 - Hydrophobic seed protein (Hydrophob_seed)	-1.4797	2.96126e-139
Glyma.18G050200.Wm82.a4.v1	(1 of 14) PF06697 - Protein of unknown function (DUF1191) (DUF1191)	-2.09618	1.84254e-07
Glyma.17G234000.Wm82.a4.v1	-	-1.22087	0.00137192
Glyma.17G086700.Wm82.a4.v1	-	-5.0673	0.000678831
Glyma.02G153000.Wm82.a4.v1	(1 of 4) PTHR10168//PTHR10168:SF57 - GLUTAREDOXIN // GLUTAREDOXIN-C13-RELATED	-1.68161	0.00420099
Glyma.17G233600.Wm82.a4.v1	(1 of 7) PTHR22849:SF6 - U-BOX DOMAIN-CONTAINING PROTEIN 30-RELATED	-2.58862	3.07187e-07
Glyma.15G003900.Wm82.a4.v1	(1 of 6) PTHR19139//PTHR19139:SF170 - AQUAPORIN TRANSPORTER // AQUAPORIN NIP6-1	-1.14041	6.47149e-28
Glyma.03G069400.Wm82.a4.v1	(1 of 4) 1.2.1.41//2.7.2.11 - Glutamate-5-semialdehyde dehydrogenase / Glutamyl-gamma-semialdehyde dehydrogenase // Glutamate 5-kinase / Gamma-glutamyl kinase	-1.37998	2.15177e-06
Glyma.14G010300.Wm82.a4.v1	(1 of 5) PTHR22950//PTHR22950:SF228 - AMINO ACID TRANSPORTER // AMINO ACID PERMEASE 7-RELATED	-1.04799	7.57488e-05
Glyma.03G006200.Wm82.a4.v1	(1 of 2) PTHR22835//PTHR22835:SF117 - ZINC FINGER FYVE DOMAIN CONTAINING PROTEIN // ALPHA-L-FUCOSIDASE 3	-5.15	8.714e-05
Glyma.08G037700.Wm82.a4.v1	(1 of 5) PTHR10460//PTHR10460:SF11 - ABL INTERACTOR // SUBFAMILY NOT NAMED	-1.71902	0.000119505
Glyma.13G077500.Wm82.a4.v1	(1 of 3) PTHR26402//PTHR26402:SF498 - RESPONSE REGULATOR OF TWO-COMPONENT SYSTEM // SUBFAMILY NOT NAMED	-2.98482	0.00675706
Glyma.17G068900.Wm82.a4.v1	-	-2.90787	0.00289889
Glyma.04G179500.Wm82.a4.v1	(1 of 9) PTHR23201//PTHR23201:SF18 - EXTENSIN, PROLINE-RICH PROTEIN // SUBFAMILY NOT NAMED	-1.87466	1.17385e-18
Glyma.03G019800.Wm82.a4.v1	(1 of 6) K05282 - gibberellin 20-oxidase (E1.14.11.12)	-1.47468	0.00274939
Glyma.04G222100.Wm82.a4.v1	(1 of 7) PTHR31867:SF22 - EXPANSIN-A8	-1.83297	3.02719e-129
Glyma.19G110200.Wm82.a4.v1	(1 of 4) PTHR10071//PTHR10071:SF161 - TRANSCRIPTION FACTOR GATA GATA BINDING FACTOR // SUBFAMILY NOT NAMED	-1.07031	0.00259717
Glyma.01G078300.Wm82.a4.v1	(1 of 20) PTHR24298:SF86 - CYTOCHROME P450 71B21-RELATED	-10.3074	3.20927e-18
Glyma.08G216600.Wm82.a4.v1	(1 of 8) PTHR31194//PTHR31194:SF4 - SHN SHINE , DNA BINDING / TRANSCRIPTION FACTOR // ETHYLENE-RESPONSIVE TRANSCRIPTION FACTOR ERF003	-7.24823	1.91504e-09
Glyma.03G170400.Wm82.a4.v1	(1 of 49) PF12796//PF13962 - Ankyrin repeats (3 copies) (Ank_2) // Domain of unknown function (PGG)	-1.0833	5.77297e-08
Glyma.02G092600.Wm82.a4.v1	(1 of 82) PF04535 - Domain of unknown function (DUF588) (DUF588)	-8.78506	2.13147e-13
Glyma.17G016800.Wm82.a4.v1	(1 of 4) PTHR22814//PTHR22814:SF33 - COPPER TRANSPORT PROTEIN ATOX1-RELATED // HEAVY METAL TRANSPORT/DETOXIFICATION DOMAIN-CONTAINING PROTEIN	-1.14427	4.25559e-19
Glyma.18G263200.Wm82.a4.v1	(1 of 7) PTHR24223:SF181 - ABC TRANSPORTER C FAMILY MEMBER 3-RELATED	-4.58682	1.14997e-08
Glyma.10G222100.Wm82.a4.v1	-	-1.42178	7.9955e-05
Glyma.19G063800.Wm82.a4.v1	(1 of 5) PF00069//PF07714//PF08263//PF13855 - Protein kinase domain (Pkinase) // Protein tyrosine kinase (Pkinase_Tyr) // Leucine rich repeat N-terminal domain (LRRNT_2) // Leucine rich repeat (LRR_8)	-1.07807	8.88863e-10
Glyma.04G191100.Wm82.a4.v1	(1 of 4) PTHR31683//PTHR31683:SF28 - FAMILY NOT NAMED // PECTATE LYASE 22-RELATED	-1.43494	5.70907e-72
Glyma.11G196200.Wm82.a4.v1	(1 of 20) PF04784//PF14389 - Protein of unknown function, DUF547 (DUF547) // Leucine-zipper of ternary complex factor MIP1 (Lzipper-MIP1)	-1.41337	6.15957e-18
Glyma.16G028100.Wm82.a4.v1	(1 of 2) PTHR23130//PTHR23130:SF78 - FAMILY NOT NAMED // CYTOCHROME B561/FERRIC REDUCTASE TRANSMEMBRANE WITH DOMON RELATED DOMAIN	-1.38414	0.00105699
Glyma.06G143700.Wm82.a4.v1	(1 of 2) PF05349 - GATA-type transcription activator, N-terminal (GATA-N)	-1.96225	2.25074e-06
Glyma.14G175800.Wm82.a4.v1	(1 of 8) PTHR11926//PTHR11926:SF286 - GLUCOSYL/GLUCURONOSYL TRANSFERASES // SUBFAMILY NOT NAMED	-1.25173	3.57678e-13
Glyma.11G221000.Wm82.a4.v1	(1 of 7) KOG0651 - 26S proteasome regulatory complex, ATPase RPT4	-2.83547	2.30683e-06
Glyma.13G269100.Wm82.a4.v1	-	-1.088	3.4375e-18
Glyma.06G225500.Wm82.a4.v1	(1 of 5) PTHR13301//PTHR13301:SF28 - X-BOX TRANSCRIPTION FACTOR-RELATED // SUBFAMILY NOT NAMED	-1.32736	1.56164e-78
Glyma.12G190900.Wm82.a4.v1	(1 of 10) PTHR33264//PTHR33264:SF5 - FAMILY NOT NAMED // EXPRESSED PROTEIN-RELATED	-6.37568	7.99111e-07
Glyma.06G065000.Wm82.a4.v1	(1 of 4) PTHR13301//PTHR13301:SF31 - X-BOX TRANSCRIPTION FACTOR-RELATED // CELLULOSE SYNTHASE A CATALYTIC SUBUNIT 8 [UDP-FORMING]	-1.13328	6.11006e-76
Glyma.03G244600.Wm82.a4.v1	(1 of 10) 2.3.1.196 - Benzyl alcohol O-benzoyltransferase	-5.60701	1.06315e-05
Glyma.11G146272.Wm82.a4.v1	(1 of 3) PTHR27003//PTHR27003:SF94 - FAMILY NOT NAMED // RECEPTOR-LIKE PROTEIN KINASE HERK 1	-1.01567	0.00169892
Glyma.09G129700.Wm82.a4.v1	(1 of 4) PTHR12064//PTHR12064:SF36 - ANCIENT CONSERVED DOMAIN PROTEIN-RELATED // SUBFAMILY NOT NAMED	-6.59551	2.30559e-07
Glyma.08G102100.Wm82.a4.v1	(1 of 4) K00059 - 3-oxoacyl- (fabG)	-4.03719	3.91766e-09
Glyma.02G015800.Wm82.a4.v1	(1 of 3) K01679 - fumarate hydratase, class II (E4.2.1.2B, fumC)	-5.50182	8.99249e-05
Glyma.18G259400.Wm82.a4.v1	(1 of 4) PTHR23201:SF21 - GIBBERELLIN-REGULATED PROTEIN 4	-1.40811	9.38183e-28
Glyma.03G104500.Wm82.a4.v1	(1 of 23) 2.4.1.218 - Hydroquinone glucosyltransferase / Hydroquinone:O-glucosyltransferase	-1.30906	8.57563e-06
Glyma.13G322900.Wm82.a4.v1	(1 of 2) PTHR10641//PTHR10641:SF630 - MYB-LIKE DNA-BINDING PROTEIN MYB // SUBFAMILY NOT NAMED	-1.83394	3.3172e-09
Glyma.05G204800.Wm82.a4.v1	(1 of 56) PF00314 - Thaumatin family (Thaumatin)	-2.23398	7.29155e-53
Glyma.06G160400.Wm82.a4.v1	(1 of 5) PTHR33147//PTHR33147:SF3 - FAMILY NOT NAMED // DEFENSIN-LIKE PROTEIN 6	-3.84741	7.99685e-24
Glyma.19G167600.Wm82.a4.v1	(1 of 2) PTHR31284:SF15 - HAD SUPERFAMILY, SUBFAMILY IIIB ACID PHOSPHATASE	-1.32466	1.00373e-20
Glyma.02G259700.Wm82.a4.v1	(1 of 6) PF04588 - Hypoxia induced protein conserved region (HIG_1_N)	-2.48297	8.36187e-11
Glyma.04G174600.Wm82.a4.v1	(1 of 3) 1.1.1.223 - Isopiperitenol dehydrogenase	-3.24007	0.00253737
Glyma.17G176500.Wm82.a4.v1	-	-1.61946	0.00844667
Glyma.05G095500.Wm82.a4.v1	(1 of 40) PF03763 - Remorin, C-terminal region (Remorin_C)	-1.75032	1.05818e-18
Glyma.13G356000.Wm82.a4.v1	(1 of 5) PTHR19139//PTHR19139:SF99 - AQUAPORIN TRANSPORTER // AQUAPORIN TIP2-1	-2.40436	3.51442e-06
Glyma.16G014100.Wm82.a4.v1	(1 of 2) PTHR31707//PTHR31707:SF55 - FAMILY NOT NAMED // PECTINESTERASE 2-RELATED	-1.26802	2.92231e-152
Glyma.11G075000.Wm82.a4.v1	(1 of 2) PTHR10374//PTHR10374:SF23 - LACTOYLGLUTATHIONE LYASE GLYOXALASE I // SUBFAMILY NOT NAMED	-2.82822	2.31548e-36
Glyma.05G205900.Wm82.a4.v1	(1 of 4) PTHR31775:SF5 - REMORIN FAMILY PROTEIN-RELATED	-8.88794	1.31077e-13
Glyma.08G058600.Wm82.a4.v1	(1 of 19) PF07887 - Calmodulin binding protein-like (Calmodulin_bind)	-1.41027	0.00589201
Glyma.02G311000.Wm82.a4.v1	(1 of 4) PTHR32002//PTHR32002:SF3 - FAMILY NOT NAMED // PROTEIN NLP1-RELATED	-2.40679	2.21259e-33
Glyma.01G010200.Wm82.a4.v1	(1 of 2) 2.7.1.19 - Phosphoribulokinase / Phosphopentokinase	-1.48359	1.73641e-05
Glyma.03G077900.Wm82.a4.v1	(1 of 9) PTHR11709:SF103 - LACCASE-16	-1.16031	1.2129e-65
Glyma.20G149700.Wm82.a4.v1	(1 of 2) PTHR22763//PTHR22763:SF83 - RING ZINC FINGER PROTEIN // SUBFAMILY NOT NAMED	-1.16422	9.31311e-05
Glyma.13G284700.Wm82.a4.v1	-	-3.28689	5.73231e-13
Glyma.06G269300.Wm82.a4.v1	(1 of 1) 2.7.1.24//3.6.3.44 - Dephospho-CoA kinase / Dephosphocoenzyme A kinase // Xenobiotic-transporting ATPase / Steroid-transporting ATPase	-1.59845	7.2059e-06
Glyma.13G359100.Wm82.a4.v1	(1 of 51) PF08477 - Ras of Complex, Roc, domain of DAPkinase (Roc)	-4.78464	0.00232223
Glyma.10G248800.Wm82.a4.v1	(1 of 3) 2.5.1.79 - Thermospermine synthase	-1.08434	5.21207e-12
Glyma.02G295300.Wm82.a4.v1	(1 of 3) K18848 - indole-3-acetate O-methyltransferase (IAMT1)	-2.9466	0.00827391
Glyma.09G231800.Wm82.a4.v1	(1 of 4) PTHR22298//PTHR22298:SF45 - ENDO-1,4-BETA-GLUCANASE // SUBFAMILY NOT NAMED	-6.58924	3.00724e-07
Glyma.06G113200.Wm82.a4.v1	(1 of 3) K03542 - photosystem II 22kDa protein (psbS)	-2.22373	0.000102015
Glyma.15G176900.Wm82.a4.v1	(1 of 4) PTHR31238//PTHR31238:SF21 - FAMILY NOT NAMED // GERMIN-LIKE PROTEIN SUBFAMILY 3 MEMBER 3	-4.02747	0.00708872
Glyma.06G191800.Wm82.a4.v1	(1 of 6) PTHR12565//PTHR12565:SF148 - STEROL REGULATORY ELEMENT-BINDING PROTEIN // PROTEIN BANQUO 3	-1.15529	1.52498e-07
Glyma.19G189400.Wm82.a4.v1	-	-5.73572	2.68767e-05
Glyma.18G272100.Wm82.a4.v1	(1 of 4) PTHR31673//PTHR31673:SF2 - FAMILY NOT NAMED // COBRA-LIKE PROTEIN 4	-1.12028	1.4949e-45
Glyma.02G256800.Wm82.a4.v1	(1 of 4) K09588 - cytochrome P450, family 90, subfamily A, polypeptide 1 (CYP90A1, CPD)	-1.41773	7.95537e-09
Glyma.06G026300.Wm82.a4.v1	(1 of 3) PTHR32208:SF18 - GLYOXAL OXIDASE-RELATED PROTEIN	-3.93379	5.65488e-05
Glyma.16G180500.Wm82.a4.v1	(1 of 2) PTHR31896//PTHR31896:SF4 - FAMILY NOT NAMED // BAHD ACYLTRANSFERASE DCR	-1.46419	1.19935e-07
Glyma.02G059600.Wm82.a4.v1	(1 of 3) PTHR10891//PTHR10891:SF568 - EF-HAND CALCIUM-BINDING DOMAIN CONTAINING PROTEIN // CALCIUM-BINDING PROTEIN CML41-RELATED	-1.89271	3.64737e-05
Glyma.11G053200.Wm82.a4.v1	(1 of 4) PTHR31444//PTHR31444:SF8 - FAMILY NOT NAMED // PROTEIN IRREGULAR XYLEM 15-RELATED	-1.02138	2.09864e-21
Glyma.05G222600.Wm82.a4.v1	(1 of 12) PTHR12374//PTHR12374:SF19 - TRANSCRIPTIONAL ADAPTOR 2 ADA2 -RELATED // SUBFAMILY NOT NAMED	-2.68747	2.60541e-14
Glyma.18G002600.Wm82.a4.v1	(1 of 2) PTHR11062:SF110 - EXOSTOSIN FAMILY PROTEIN	-1.60125	0.000186971
Glyma.07G173100.Wm82.a4.v1	(1 of 5) PTHR27001//PTHR27001:SF164 - FAMILY NOT NAMED // RECEPTOR PROTEIN KINASE TMK1-RELATED	-1.80284	2.7426e-05
Glyma.19G066700.Wm82.a4.v1	(1 of 3) PTHR12266//PTHR12266:SF2 - NA+/CA2+ K+ INDEPENDENT EXCHANGER // CATION/CALCIUM EXCHANGER 1	-2.37253	1.69033e-13
Glyma.01G131400.Wm82.a4.v1	(1 of 6) K12382 - saposin (PSAP, SGP1)	-5.68174	3.48238e-05
Glyma.02G028900.Wm82.a4.v1	(1 of 3) 3.4.24.65 - Macrophage elastase / Metalloelastase	-4.57233	0.00514998
Glyma.03G063900.Wm82.a4.v1	(1 of 5) PTHR22950//PTHR22950:SF256 - AMINO ACID TRANSPORTER // AUXIN TRANSPORTER PROTEIN 1-RELATED	-2.41029	4.47599e-13
Glyma.16G145300.Wm82.a4.v1	(1 of 3) PTHR11802//PTHR11802:SF71 - SERINE PROTEASE FAMILY S10 SERINE CARBOXYPEPTIDASE // SERINE CARBOXYPEPTIDASE-LIKE 26-RELATED	-1.13613	2.827e-10
Glyma.16G092700.Wm82.a4.v1	(1 of 2) PTHR13301//PTHR13301:SF46 - X-BOX TRANSCRIPTION FACTOR-RELATED // SUBFAMILY NOT NAMED	-2.01021	0.000835394
Glyma.06G021200.Wm82.a4.v1	(1 of 2) PTHR13871//PTHR13871:SF48 - THIOREDOXIN // SUBFAMILY NOT NAMED	-2.13203	2.8774e-22
Glyma.13G324200.Wm82.a4.v1	(1 of 4) PTHR11850//PTHR11850:SF125 - HOMEOBOX PROTEIN TRANSCRIPTION FACTORS // SUBFAMILY NOT NAMED	-1.83853	8.35314e-06
Glyma.02G109100.Wm82.a4.v1	(1 of 74) PF01357//PF03330 - Pollen allergen (Pollen_allerg_1) // Rare lipoprotein A (RlpA)-like double-psi beta-barrel (DPBB_1)	-1.7619	1.63272e-39
Glyma.13G175300.Wm82.a4.v1	-	-1.04194	2.42583e-87
Glyma.07G043000.Wm82.a4.v1	(1 of 2) PTHR33565:SF3 - DORMANCY/AUXIN ASSOCIATED FAMILY PROTEIN	-1.04848	7.97206e-09
Glyma.10G037600.Wm82.a4.v1	(1 of 25) PF04852 - Protein of unknown function (DUF640) (DUF640)	-2.0349	1.66587e-27
Glyma.19G123800.Wm82.a4.v1	(1 of 2) 1.14.13.81 - Magnesium-protoporphyrin IX monomethyl ester (oxidative) cyclase / Mg-protoporphyrin IX monomethyl ester oxidative cyclase	-1.21973	7.1579e-10
Glyma.19G219100.Wm82.a4.v1	(1 of 2) PTHR11183//PTHR11183:SF54 - GLYCOGENIN // SUBFAMILY NOT NAMED	-1.49968	3.04178e-28
Glyma.18G065100.Wm82.a4.v1	(1 of 9) PTHR11709:SF103 - LACCASE-16	-1.45938	3.16213e-17
Glyma.19G128200.Wm82.a4.v1	(1 of 6) PTHR11802//PTHR11802:SF94 - SERINE PROTEASE FAMILY S10 SERINE CARBOXYPEPTIDASE // SUBFAMILY NOT NAMED	-1.53105	9.61952e-23
Glyma.04G073000.Wm82.a4.v1	(1 of 7) PTHR31970:SF3 - MOLYBDATE TRANSPORTER 1	-1.96479	9.35357e-11
Glyma.15G236200.Wm82.a4.v1	(1 of 4) PTHR26402//PTHR26402:SF574 - RESPONSE REGULATOR OF TWO-COMPONENT SYSTEM // SUBFAMILY NOT NAMED	-1.45027	0.00032901
Glyma.17G232205.Wm82.a4.v1	(1 of 3) PTHR11850:SF64 - HOMEOBOX PROTEIN KNOTTED-1-LIKE 1	-1.1485	7.3497e-33
Glyma.04G060800.Wm82.a4.v1	(1 of 4) PTHR32370:SF7 - BTB/POZ DOMAIN-CONTAINING PROTEIN NPY1	-1.41294	0.00013639
Glyma.17G248700.Wm82.a4.v1	(1 of 11) KOG2966 - Uncharacterized conserved protein	-5.11318	0.000105185
Glyma.10G136300.Wm82.a4.v1	(1 of 1) PTHR35709//PTHR35709:SF1 - FAMILY NOT NAMED // PROTEIN PROTON GRADIENT REGULATION 5, CHLOROPLASTIC	-1.10024	0.000832595
Glyma.16G048600.Wm82.a4.v1	-	-4.01615	0.00693138
Glyma.16G016100.Wm82.a4.v1	(1 of 5) K08908 - light-harvesting complex I chlorophyll a/b binding protein 2 (LHCA2)	-1.1341	0.00025524
Glyma.10G037001.Wm82.a4.v1	(1 of 3) PTHR10641//PTHR10641:SF523 - MYB-LIKE DNA-BINDING PROTEIN MYB // SUBFAMILY NOT NAMED	-4.18761	0.00399788
Glyma.04G249700.Wm82.a4.v1	(1 of 3) K03542 - photosystem II 22kDa protein (psbS)	-2.15595	6.52672e-16
Glyma.09G094000.Wm82.a4.v1	(1 of 7) K00485 - dimethylaniline monooxygenase (N-oxide forming) (FMO)	-1.33742	1.97406e-34
Glyma.06G190000.Wm82.a4.v1	(1 of 33) PF00069//PF08263 - Protein kinase domain (Pkinase) // Leucine rich repeat N-terminal domain (LRRNT_2)	-1.05366	0.000470067
Glyma.09G149601.Wm82.a4.v1	(1 of 3) PTHR23024//PTHR23024:SF173 - MEMBER OF 'GDXG' FAMILY OF LIPOLYTIC ENZYMES // SUBFAMILY NOT NAMED	-1.34554	6.29685e-28
Glyma.11G049400.Wm82.a4.v1	-	-4.67844	0.00352395
Glyma.02G102700.Wm82.a4.v1	(1 of 6) PTHR13593:SF52 - F14J22.5 PROTEIN-RELATED	-8.2878	6.08075e-12
Glyma.17G221800.Wm82.a4.v1	(1 of 41) 5.3.4.1 - Protein disulfide-isomerase / S-S rearrangase	-5.7844	7.41983e-08
Glyma.02G264600.Wm82.a4.v1	(1 of 3) PTHR31642:SF19 - COA-DEPENDENT ACYLTRANSFERASE-RELATED	-1.37975	9.1809e-05
Glyma.13G108300.Wm82.a4.v1	(1 of 4) PTHR33541:SF5 - GENOMIC DNA, CHROMOSOME 3, P1 CLONE: MDC16-RELATED	-1.25713	0.000102543
Glyma.09G260500.Wm82.a4.v1	(1 of 14) PF00228 - Bowman-Birk serine protease inhibitor family (Bowman-Birk_leg)	-7.28863	3.65972e-09
Glyma.17G098700.Wm82.a4.v1	(1 of 5) K10436 - microtubule-associated protein, RP/EB family (MAPRE)	-1.73276	1.55955e-07
Glyma.17G003000.Wm82.a4.v1	(1 of 2) PTHR19308//PTHR19308:SF14 - PHOSPHATIDYLCHOLINE TRANSFER PROTEIN // PROTEIN T28D6.7	-1.14071	2.029e-07
Glyma.19G259400.Wm82.a4.v1	(1 of 8) 1.1.3.37//1.1.3.8 - D-arabinono-1,4-lactone oxidase / D-arabinono-gamma-lactone oxidase // L-gulonolactone oxidase / L-gulono-gamma-lactone oxidase	-2.69237	0.000863069
Glyma.09G026800.Wm82.a4.v1	(1 of 4) PTHR12863:SF3 - FATTY ACID 2-HYDROXYLASE 1-RELATED	-1.12594	9.37921e-07
Glyma.19G254300.Wm82.a4.v1	(1 of 4) PTHR32285:SF9 - PROTEIN TRICHOME BIREFRINGENCE-LIKE 25-RELATED	-1.00649	0.000231591
Glyma.19G053800.Wm82.a4.v1	(1 of 2) PTHR31683:SF29 - PECTATE LYASE 11-RELATED	-1.51885	1.07165e-32
Glyma.10G235000.Wm82.a4.v1	(1 of 4) PTHR33649:SF2 - PAR1 PROTEIN	-2.21255	5.70162e-05
Glyma.01G242100.Wm82.a4.v1	-	-1.46366	0.00953723
Glyma.11G066100.Wm82.a4.v1	(1 of 11) PTHR23500:SF154 - POLYOL TRANSPORTER 3-RELATED	-6.59305	2.50117e-07
Glyma.11G148100.Wm82.a4.v1	(1 of 36) PTHR32077//PTHR32077:SF7 - FAMILY NOT NAMED // FASCICLIN-LIKE ARABINOGALACTAN PROTEIN 11	-1.28617	1.2139e-53
Glyma.08G035000.Wm82.a4.v1	(1 of 70) K09286 - EREBP-like factor (EREBP)	-2.86542	0.00394298
Glyma.11G135900.Wm82.a4.v1	(1 of 2) PTHR14194//PTHR14194:SF38 - NITROGEN METABOLIC REGULATION PROTEIN NMR-RELATED // PROTEIN PLASTID TRANSCRIPTIONALLY ACTIVE 16	-1.39969	0.000634638
Glyma.14G178200.Wm82.a4.v1	(1 of 17) K10664 - E3 ubiquitin-protein ligase ATL6/9/15/31/42/55 [EC:6.3.2.19] (ATL6S)	-7.68486	3.76868e-10
Glyma.19G234500.Wm82.a4.v1	(1 of 7) PTHR10593//PTHR10593:SF31 - SERINE/THREONINE-PROTEIN KINASE RIO // C2H2-LIKE ZINC FINGER PROTEIN-RELATED	-1.21075	2.8614e-21
Glyma.20G192700.Wm82.a4.v1	(1 of 2) 5.4.99.41 - Lupeol synthase	-2.42537	0
Glyma.18G124200.Wm82.a4.v1	(1 of 8) PTHR32295//PTHR32295:SF14 - FAMILY NOT NAMED // PROTEIN IQ-DOMAIN 31-RELATED	-1.44703	3.8662e-07
Glyma.02G047600.Wm82.a4.v1	(1 of 3) 1.18.1.2//1.6.99.1 - Ferredoxin--NADP(+) reductase // NADPH dehydrogenase / NADPH diaphorase	-1.16869	2.85698e-09
Glyma.08G166200.Wm82.a4.v1	(1 of 17) PTHR13683:SF298 - ASPARTIC PROTEINASE CDR1-RELATED	-9.34976	4.02499e-15
Glyma.04G153700.Wm82.a4.v1	(1 of 6) 2.4.1.12//2.4.1.29 - Cellulose synthase (UDP-forming) / UDP-glucose-cellulose glucosyltransferase // Cellulose synthase (GDP-forming) / GDP-glucose-cellulose glucosyltransferase	-1.34503	7.06061e-46
Glyma.04G206000.Wm82.a4.v1	(1 of 2) PTHR10972//PTHR10972:SF100 - OXYSTEROL-BINDING PROTEIN-RELATED // OXYSTEROL-BINDING PROTEIN HOMOLOG 3	-1.28937	0.00272155
Glyma.01G168400.Wm82.a4.v1	(1 of 2) PTHR10374//PTHR10374:SF23 - LACTOYLGLUTATHIONE LYASE GLYOXALASE I // SUBFAMILY NOT NAMED	-2.69116	2.50581e-39
Glyma.08G138300.Wm82.a4.v1	(1 of 5) PTHR10551//PTHR10551:SF13 - FASCIN // SUBFAMILY NOT NAMED	-1.10371	7.91991e-06
Glyma.06G248900.Wm82.a4.v1	(1 of 4) PTHR31719:SF34 - NAC DOMAIN-CONTAINING PROTEIN 19-RELATED	-1.02748	3.70565e-05
Glyma.02G120300.Wm82.a4.v1	(1 of 2) PTHR10584//PTHR10584:SF155 - SUGAR KINASE // FRUCTOKINASE-LIKE 2	-1.01078	0.00254142
Glyma.02G016600.Wm82.a4.v1	(1 of 6) PTHR31707:SF38 - PECTINESTERASE/PECTINESTERASE INHIBITOR 20-RELATED	-2.1623	0.000575583
Glyma.14G000700.Wm82.a4.v1	-	-1.01499	1.47148e-24
Glyma.11G116600.Wm82.a4.v1	(1 of 4) PTHR22572:SF111 - GLUCOSE-1-PHOSPHATE ADENYLYLTRANSFERASE LARGE SUBUNIT 3, CHLOROPLASTIC-RELATED	-1.68337	3.41419e-05
Glyma.13G310800.Wm82.a4.v1	(1 of 10) PTHR33264//PTHR33264:SF5 - FAMILY NOT NAMED // EXPRESSED PROTEIN-RELATED	-2.48299	1.43616e-06
Glyma.05G236400.Wm82.a4.v1	(1 of 2) PTHR22298//PTHR22298:SF28 - ENDO-1,4-BETA-GLUCANASE // ENDOGLUCANASE 4-RELATED	-1.05599	5.05438e-35
Glyma.10G058800.Wm82.a4.v1	(1 of 5) PTHR21576//PTHR21576:SF18 - UNCHARACTERIZED NODULIN-LIKE PROTEIN // SUBFAMILY NOT NAMED	-1.09095	1.1317e-08
Glyma.19G255100.Wm82.a4.v1	(1 of 3) PTHR21493//PTHR21493:SF124 - CGI-141-RELATED/LIPASE CONTAINING PROTEIN // SUBFAMILY NOT NAMED	-1.44352	1.96396e-34
Glyma.17G151500.Wm82.a4.v1	(1 of 157) PF04043 - Plant invertase/pectin methylesterase inhibitor (PMEI)	-2.17252	1.40721e-05
Glyma.11G220300.Wm82.a4.v1	(1 of 3) PTHR13683//PTHR13683:SF347 - ASPARTYL PROTEASES // CYSTEINE-RICH PEPTIDE FAMILY PROTEIN	-1.16413	3.54649e-06
Glyma.01G081600.Wm82.a4.v1	(1 of 2) PTHR11654//PTHR11654:SF178 - OLIGOPEPTIDE TRANSPORTER-RELATED // PROTEIN NRT1/ PTR FAMILY 3.1	-1.17028	3.24982e-26
Glyma.02G123800.Wm82.a4.v1	(1 of 3) PTHR31116:SF2 - 3-METHYLADENINE GLYCOSYLASE I-RELATED	-1.10472	9.1393e-12
Glyma.08G070600.Wm82.a4.v1	(1 of 2) K02548 - 1,4-dihydroxy-2-naphthoate octaprenyltransferase (menA)	-1.38991	0.000372137
Glyma.15G260900.Wm82.a4.v1	(1 of 8) PF02451 - Nodulin (Nodulin)	-8.06243	2.79835e-11
Glyma.03G007700.Wm82.a4.v1	(1 of 2) PTHR31235:SF13 - PEROXIDASE 28-RELATED	-1.04872	2.01787e-14
Glyma.17G061100.Wm82.a4.v1	(1 of 24) PTHR31642//PTHR31642:SF57 - FAMILY NOT NAMED // SPERMIDINE HYDROXYCINNAMOYL TRANSFERASE	-5.16337	0.000525925
Glyma.19G201500.Wm82.a4.v1	(1 of 12) PTHR31358//PTHR31358:SF10 - FAMILY NOT NAMED // TARGETING PROTEIN FOR XKLP2-LIKE PROTEIN	-1.35063	9.33084e-10
Glyma.15G131200.Wm82.a4.v1	(1 of 2) 1.1.1.31 - 3-hydroxyisobutyrate dehydrogenase	-1.07911	0.000164194
Glyma.18G016300.Wm82.a4.v1	(1 of 4) PTHR10992//PTHR10992:SF792 - ALPHA/BETA HYDROLASE FOLD-CONTAINING PROTEIN // SUBFAMILY NOT NAMED	-1.16217	1.79979e-13
Glyma.11G169473.Wm82.a4.v1	(1 of 11) 2.3.3.13 - 2-isopropylmalate synthase / Isopropylmalate synthetase	-4.98312	0.000989842
Glyma.15G009600.Wm82.a4.v1	(1 of 65) PF05553 - Cotton fibre expressed protein (DUF761)	-1.60049	4.0869e-12
Glyma.09G185500.Wm82.a4.v1	(1 of 8) PF00257 - Dehydrin (Dehydrin)	-8.26747	7.33159e-12
Glyma.13G044100.Wm82.a4.v1	(1 of 7) 2.3.1.162 - Taxadien-5-alpha-ol O-acetyltransferase / Taxadienol acetyltransferase	-7.09015	1.21641e-08
Glyma.17G043200.Wm82.a4.v1	(1 of 4) PTHR13683:SF296 - ASPARTYL PROTEASE FAMILY PROTEIN	-2.39657	3.08404e-22
Glyma.13G116700.Wm82.a4.v1	(1 of 4) PTHR13683:SF296 - ASPARTYL PROTEASE FAMILY PROTEIN	-3.1039	6.28889e-22
Glyma.07G271100.Wm82.a4.v1	(1 of 171) PF02365 - No apical meristem (NAM) protein (NAM)	-2.43611	1.66113e-23
Glyma.12G121000.Wm82.a4.v1	(1 of 6) PTHR13301//PTHR13301:SF69 - X-BOX TRANSCRIPTION FACTOR-RELATED // BASIC HELIX-LOOP-HELIX DOMAIN-CONTAINING PROTEIN	-1.34662	4.64836e-09
Glyma.06G119200.Wm82.a4.v1	(1 of 11) PF00069//PF13947 - Protein kinase domain (Pkinase) // Wall-associated receptor kinase galacturonan-binding (GUB_WAK_bind)	-6.68542	4.97746e-08
Glyma.20G111900.Wm82.a4.v1	(1 of 4) PTHR11785//PTHR11785:SF331 - AMINO ACID TRANSPORTER // SUBFAMILY NOT NAMED	-1.61374	7.67608e-09
Glyma.12G178000.Wm82.a4.v1	(1 of 57) K08235 - xyloglucan:xyloglucosyl transferase (E2.4.1.207)	-2.20033	1.46249e-104
Glyma.10G251700.Wm82.a4.v1	(1 of 10) PTHR31062:SF1 - XYLOGLUCAN ENDOTRANSGLUCOSYLASE/HYDROLASE PROTEIN 8-RELATED	-1.27016	4.85947e-15
Glyma.12G218651.Wm82.a4.v1	-	-2.4246	0.00208868
Glyma.18G203602.Wm82.a4.v1	-	-1.17624	0.00217184
Glyma.08G210900.Wm82.a4.v1	(1 of 2) PTHR10458//PTHR10458:SF11 - PEPTIDE DEFORMYLASE // PEPTIDE DEFORMYLASE, MITOCHONDRIAL	-1.26306	0.000623792
Glyma.01G110100.Wm82.a4.v1	(1 of 19) PTHR33103//PTHR33103:SF4 - FAMILY NOT NAMED // EMB|CAB69840.1	-2.75105	1.66695e-11
Glyma.02G018900.Wm82.a4.v1	(1 of 6) PTHR12565//PTHR12565:SF148 - STEROL REGULATORY ELEMENT-BINDING PROTEIN // PROTEIN BANQUO 3	-1.93266	0.00212204
Glyma.06G266900.Wm82.a4.v1	(1 of 4) PTHR32116//PTHR32116:SF24 - FAMILY NOT NAMED // GALACTURONOSYLTRANSFERASE 12-RELATED	-1.27277	1.72396e-17
Glyma.02G210700.Wm82.a4.v1	(1 of 17) K10664 - E3 ubiquitin-protein ligase ATL6/9/15/31/42/55 [EC:6.3.2.19] (ATL6S)	-2.02826	1.30581e-15
Glyma.04G088200.Wm82.a4.v1	(1 of 4) PTHR22950//PTHR22950:SF278 - AMINO ACID TRANSPORTER // AMINO ACID PERMEASE 1-RELATED	-1.18541	4.75607e-138
Glyma.11G239300.Wm82.a4.v1	(1 of 4) PTHR10788//PTHR10788:SF19 - TREHALOSE-6-PHOSPHATE SYNTHASE // TREHALOSE-PHOSPHATE PHOSPHATASE E-RELATED	-1.02641	1.65361e-08
Glyma.13G240500.Wm82.a4.v1	(1 of 4) 3.5.2.5 - Allantoinase	-5.47688	2.05063e-05
Glyma.06G014500.Wm82.a4.v1	(1 of 2) PTHR31407//PTHR31407:SF17 - FAMILY NOT NAMED // PSBP DOMAIN-CONTAINING PROTEIN 3, CHLOROPLASTIC	-1.31054	0.00813621
Glyma.18G034300.Wm82.a4.v1	(1 of 4) PROLINE-MULTI -	-1.14927	2.94202e-15
Glyma.15G276500.Wm82.a4.v1	(1 of 3) K13366 - polyamine oxidase (MPAO, PAO1)	-1.2638	4.04711e-13
Glyma.14G124400.Wm82.a4.v1	(1 of 78) PF00069//PF08263//PF13855 - Protein kinase domain (Pkinase) // Leucine rich repeat N-terminal domain (LRRNT_2) // Leucine rich repeat (LRR_8)	-1.06263	1.17279e-14
Glyma.13G150300.Wm82.a4.v1	(1 of 42) PF01535//PF12854//PF13041 - PPR repeat (PPR) // PPR repeat (PPR_1) // PPR repeat family (PPR_2)	-1.24591	0.00928274
Glyma.02G263300.Wm82.a4.v1	(1 of 37) PF04749 - PLAC8 family (PLAC8)	-2.12646	6.2908e-06
Glyma.18G177200.Wm82.a4.v1	(1 of 6) PTHR11709//PTHR11709:SF70 - MULTI-COPPER OXIDASE // SUBFAMILY NOT NAMED	-1.27512	9.08658e-09
Glyma.02G209500.Wm82.a4.v1	(1 of 85) PF02298 - Plastocyanin-like domain (Cu_bind_like)	-1.77314	0.000114667
Glyma.01G128000.Wm82.a4.v1	(1 of 4) PTHR11615//PTHR11615:SF144 - NITRATE, FROMATE, IRON DEHYDROGENASE // SUBFAMILY NOT NAMED	-9.1705	1.5071e-14
Glyma.06G138300.Wm82.a4.v1	(1 of 131) PF00892 - EamA-like transporter family (EamA)	-4.82675	0.000353872
Glyma.03G184000.Wm82.a4.v1	(1 of 4) PTHR11964:SF15 - S-ADENOSYLMETHIONINE SYNTHASE 3	-1.24003	2.75755e-17
Glyma.16G197200.Wm82.a4.v1	(1 of 4) PTHR10108//PTHR10108:SF861 - METHYLTRANSFERASE // SUBFAMILY NOT NAMED	-1.53189	2.55067e-12
Glyma.08G245600.Wm82.a4.v1	(1 of 9) K01180 - endo-1,3(4)-beta-glucanase (E3.2.1.6)	-5.80403	4.62231e-06
Glyma.12G037400.Wm82.a4.v1	(1 of 4) PTHR11627:SF16 - FRUCTOSE-BISPHOSPHATE ALDOLASE 1, CHLOROPLASTIC-RELATED	-1.12049	9.26398e-05
Glyma.03G132700.Wm82.a4.v1	(1 of 5) PTHR32227:SF49 - BETA-1,3-GLUCANASE 1-RELATED	-2.04468	0
Glyma.04G244100.Wm82.a4.v1	(1 of 11) PF00069//PF13947 - Protein kinase domain (Pkinase) // Wall-associated receptor kinase galacturonan-binding (GUB_WAK_bind)	-7.69834	2.9739e-10
Glyma.20G144000.Wm82.a4.v1	(1 of 85) PF02298 - Plastocyanin-like domain (Cu_bind_like)	-1.10601	0.00033855
Glyma.03G187500.Wm82.a4.v1	(1 of 12) K13496 - UDP-glucosyl transferase 73C [EC:2.4.1.-] Glc - brassinosteroid (UGT73C)	-1.95787	1.06624e-21
Glyma.06G100300.Wm82.a4.v1	(1 of 85) PF02298 - Plastocyanin-like domain (Cu_bind_like)	-1.60113	6.03307e-116
Glyma.04G208450.Wm82.a4.v1	(1 of 1) PTHR23421//PTHR23421:SF67//PTHR23421:SF73 - BETA-GALACTOSIDASE RELATED // BETA-GALACTOSIDASE 10 // BETA-GALACTOSIDASE 6	-1.76612	6.08544e-33
Glyma.06G088200.Wm82.a4.v1	(1 of 7) PTHR22950//PTHR22950:SF208 - AMINO ACID TRANSPORTER // SUBFAMILY NOT NAMED	-1.1751	0.000191923
Glyma.01G112600.Wm82.a4.v1	(1 of 9) PTHR11709:SF103 - LACCASE-16	-1.29925	7.82898e-102
Glyma.09G023600.Wm82.a4.v1	(1 of 5) PTHR24326//PTHR24326:SF191 - FAMILY NOT NAMED // HOMEOBOX-LEUCINE ZIPPER PROTEIN ATHB-14-RELATED	-1.04244	2.49385e-38
Glyma.02G207200.Wm82.a4.v1	(1 of 2) PTHR18934:SF131 - RNA HELICASE, PUTATIVE-RELATED	-1.0286	0.00408521
Glyma.10G121000.Wm82.a4.v1	(1 of 100) PF14368 - Probable lipid transfer (LTP_2)	-5.7936	1.96491e-05
Glyma.13G363300.Wm82.a4.v1	(1 of 18) PTHR23241 - LATE EMBRYOGENESIS ABUNDANT PLANTS LEA-RELATED	-2.61179	0.00211012
Glyma.18G197400.Wm82.a4.v1	(1 of 9) PTHR11709:SF103 - LACCASE-16	-2.03276	2.38322e-09
Glyma.07G080500.Wm82.a4.v1	(1 of 5) PTHR10795//PTHR10795:SF387 - PROPROTEIN CONVERTASE SUBTILISIN/KEXIN // SUBTILISIN-LIKE SERINE PROTEASE-RELATED	-1.00889	0.00139536
Glyma.19G135900.Wm82.a4.v1	(1 of 3) PTHR18952//PTHR18952:SF118 - CARBONIC ANHYDRASE // ALPHA CARBONIC ANHYDRASE 6	-5.15591	0.000539608
Glyma.17G133500.Wm82.a4.v1	(1 of 5) PTHR10795//PTHR10795:SF369 - PROPROTEIN CONVERTASE SUBTILISIN/KEXIN // SUBFAMILY NOT NAMED	-4.64572	4.93461e-16
Glyma.03G005400.Wm82.a4.v1	(1 of 10) PTHR11206//PTHR11206:SF102 - MULTIDRUG RESISTANCE PROTEIN // MATE EFFLUX FAMILY PROTEIN	-1.49888	2.09562e-40
Glyma.13G275300.Wm82.a4.v1	-	-1.2123	9.5742e-16
Glyma.13G063100.Wm82.a4.v1	(1 of 6) PTHR31948:SF12 - MINI ZINC FINGER PROTEIN 2	-2.33116	0.00285136
Glyma.10G017100.Wm82.a4.v1	(1 of 3) PTHR31707:SF25 - PECTINESTERASE/PECTINESTERASE INHIBITOR 39-RELATED	-2.39027	0.00286674
Glyma.08G088400.Wm82.a4.v1	(1 of 4) PTHR13301//PTHR13301:SF59 - X-BOX TRANSCRIPTION FACTOR-RELATED // CELLULOSE SYNTHASE A CATALYTIC SUBUNIT 7 [UDP-FORMING]	-1.30546	0.00014326
Glyma.19G259700.Wm82.a4.v1	(1 of 3) PTHR31989//PTHR31989:SF45 - FAMILY NOT NAMED // NAC DOMAIN-CONTAINING PROTEIN 43-RELATED	-4.59747	5.4571e-05
Glyma.20G164200.Wm82.a4.v1	(1 of 25) PF00069//PF00954//PF01453 - Protein kinase domain (Pkinase) // S-locus glycoprotein domain (S_locus_glycop) // D-mannose binding lectin (B_lectin)	-1.53184	2.62479e-06
Glyma.10G210000.Wm82.a4.v1	(1 of 4) PTHR10774:SF62 - SYNAPTOTAGMIN-3	-1.3828	3.68864e-13
Glyma.15G044300.Wm82.a4.v1	(1 of 1) K10869 - RAD51-like protein 1 (RAD51L1, RAD51B)	-2.35323	0.00235811
Glyma.04G245300.Wm82.a4.v1	(1 of 4) PTHR27001:SF44 - ADENINE NUCLEOTIDE ALPHA HYDROLASES-DOMAIN CONTAINING PROTEIN KINASE	-1.44657	0.000373929
Glyma.05G040300.Wm82.a4.v1	(1 of 4) PTHR31268//PTHR31268:SF2 - FAMILY NOT NAMED // GALACTINOL--SUCROSE GALACTOSYLTRANSFERASE 5-RELATED	-2.46586	0.00148798
Glyma.08G159900.Wm82.a4.v1	(1 of 4) PTHR23118//PTHR23118:SF9 - ATP-CITRATE SYNTHASE // SUBFAMILY NOT NAMED	-2.37938	0
Glyma.13G218100.Wm82.a4.v1	-	-1.74282	0.00226413
Glyma.11G153800.Wm82.a4.v1	(1 of 11) PTHR10502//PTHR10502:SF113 - ANNEXIN // SUBFAMILY NOT NAMED	-1.04286	6.77791e-17
Glyma.01G044800.Wm82.a4.v1	(1 of 6) PTHR12565//PTHR12565:SF148 - STEROL REGULATORY ELEMENT-BINDING PROTEIN // PROTEIN BANQUO 3	-1.93388	5.56113e-14
Glyma.15G202300.Wm82.a4.v1	(1 of 2) PTHR11071//PTHR11071:SF286 - PEPTIDYL-PROLYL CIS-TRANS ISOMERASE // SUBFAMILY NOT NAMED	-1.18554	0.00634545
Glyma.06G033300.Wm82.a4.v1	(1 of 7) PTHR10593//PTHR10593:SF31 - SERINE/THREONINE-PROTEIN KINASE RIO // C2H2-LIKE ZINC FINGER PROTEIN-RELATED	-1.4191	5.09339e-30
Glyma.02G013300.Wm82.a4.v1	(1 of 4) PTHR30620//PTHR30620:SF4 - PERIPLASMIC BETA-GLUCOSIDASE-RELATED // BETA-D-XYLOSIDASE 2-RELATED	-1.07861	4.79948e-21
Glyma.18G018400.Wm82.a4.v1	(1 of 4) PTHR33305:SF10 - ETHYLENE INSENSITIVE 3-LIKE 4 PROTEIN-RELATED	-3.91946	0.00993572
Glyma.15G260700.Wm82.a4.v1	(1 of 17) PTHR13683:SF298 - ASPARTIC PROTEINASE CDR1-RELATED	-10.9556	1.9053e-20
Glyma.20G144300.Wm82.a4.v1	(1 of 6) PTHR23500:SF70 - SUGAR TRANSPORT PROTEIN 13	-5.18699	4.85614e-19
Glyma.12G053300.Wm82.a4.v1	-	-4.56575	1.45001e-08
Glyma.07G219900.Wm82.a4.v1	(1 of 5) PTHR23180//PTHR23180:SF290 - CENTAURIN/ARF // C2 DOMAIN-CONTAINING PROTEIN-RELATED	-5.73876	2.5646e-05
Glyma.13G191600.Wm82.a4.v1	(1 of 3) K01025 - uncharacterized protein (E2.8.2.-)	-8.0038	2.07064e-11
Glyma.07G183300.Wm82.a4.v1	(1 of 8) 2.4.1.91 - Flavonol 3-O-glucosyltransferase / UDP-glucose flavonol 3-O-glucosyltransferase	-5.0697	0.000661612
Glyma.02G016400.Wm82.a4.v1	(1 of 5) PTHR22298:SF55 - ENDOGLUCANASE 1-RELATED	-3.14542	7.27837e-34
Glyma.06G100000.Wm82.a4.v1	(1 of 4) PTHR11969//PTHR11969:SF19 - MAX DIMERIZATION, MAD // SUBFAMILY NOT NAMED	-1.17279	3.05434e-110
Glyma.10G021700.Wm82.a4.v1	(1 of 2) PTHR35725:SF1 - CLASSICAL ARABINOGALACTAN PROTEIN 26	-1.12855	1.25152e-05
Glyma.07G185200.Wm82.a4.v1	(1 of 37) PF04749 - PLAC8 family (PLAC8)	-2.84223	6.4954e-07
Glyma.03G109100.Wm82.a4.v1	(1 of 176) PF03106 - WRKY DNA -binding domain (WRKY)	-1.66157	5.96361e-05
Glyma.13G365400.Wm82.a4.v1	(1 of 6) PTHR27002//PTHR27002:SF31 - FAMILY NOT NAMED // G-TYPE LECTIN S-RECEPTOR-LIKE SERINE/THREONINE-PROTEIN KINASE SD2-5	-1.54597	0.000309605
Glyma.12G228200.Wm82.a4.v1	(1 of 7) PTHR32295:SF9 - IQ-DOMAIN 9 PROTEIN	-1.05785	2.3661e-11
Glyma.01G095000.Wm82.a4.v1	(1 of 21) PTHR33107:SF5 - KUNITZ FAMILY TRYPSIN AND PROTEASE INHIBITOR PROTEIN-RELATED	-7.00377	2.06018e-08
Glyma.17G239300.Wm82.a4.v1	(1 of 455) PF00560 - Leucine Rich Repeat (LRR_1)	-1.27412	1.93641e-15
Glyma.01G002902.Wm82.a4.v1	(1 of 2) PTHR10108//PTHR10108:SF871 - METHYLTRANSFERASE // METHYLTRANSFERASE	-1.21861	0.00394801
Glyma.17G027800.Wm82.a4.v1	(1 of 38) PF04570 - zinc-finger of the FCS-type, C2-C2 (zf-FLZ)	-1.51168	0.00652663
Glyma.06G265400.Wm82.a4.v1	(1 of 25) PF00931//PF07725//PF13676 - NB-ARC domain (NB-ARC) // Leucine Rich Repeat (LRR_3) // TIR domain (TIR_2)	-2.35906	8.60397e-08
Glyma.11G154900.Wm82.a4.v1	(1 of 4) PF02095 - Extensin-like protein repeat (Extensin_1)	-1.04667	1.27289e-27
Glyma.05G187900.Wm82.a4.v1	(1 of 131) PF00892 - EamA-like transporter family (EamA)	-1.86568	1.97747e-16
Glyma.14G159300.Wm82.a4.v1	(1 of 3) PTHR32295:SF33 - PROTEIN IQ-DOMAIN 21	-1.55124	3.61551e-35
Glyma.14G089063.Wm82.a4.v1	(1 of 8) PTHR33285//PTHR33285:SF1 - FAMILY NOT NAMED // GROWTH FACTOR PROTEIN-RELATED	-1.26157	1.03219e-14
Glyma.17G064400.Wm82.a4.v1	(1 of 4) PTHR24096//PTHR24096:SF149 - FAMILY NOT NAMED // 4-COUMARATE--COA LIGASE 1-RELATED	-2.38026	0.00333653
Glyma.02G229500.Wm82.a4.v1	(1 of 9) PTHR27001:SF83 - LRR RECEPTOR-LIKE SERINE/THREONINE-PROTEIN KINASE MRH1-RELATED	-1.14118	5.30287e-13
Glyma.12G077800.Wm82.a4.v1	(1 of 4) PTHR11850//PTHR11850:SF125 - HOMEOBOX PROTEIN TRANSCRIPTION FACTORS // SUBFAMILY NOT NAMED	-3.56981	3.28397e-26
Glyma.08G229700.Wm82.a4.v1	(1 of 273) PF00646 - F-box domain (F-box)	-5.65967	3.84182e-32
Glyma.18G055800.Wm82.a4.v1	-	-2.10724	1.29543e-18
Glyma.10G249500.Wm82.a4.v1	(1 of 6) PTHR23500:SF70 - SUGAR TRANSPORT PROTEIN 13	-1.52418	0.000105068
Glyma.15G099300.Wm82.a4.v1	(1 of 11) K01662 - 1-deoxy-D-xylulose-5-phosphate synthase (dxs)	-3.56808	0.00489464
Glyma.18G018900.Wm82.a4.v1	(1 of 8) K17469 - sulfate transporter 2, low-affinity (SULTR2)	-8.23667	1.07379e-29
Glyma.03G257500.Wm82.a4.v1	(1 of 4) PTHR23130:SF97 - CYTOCHROME B561/FERRIC REDUCTASE TRANSMEMBRANE WITH DOMON RELATED DOMAIN	-1.13026	3.01009e-16
Glyma.08G312000.Wm82.a4.v1	(1 of 22) K13065 - shikimate O-hydroxycinnamoyltransferase (E2.3.1.133, HCT)	-1.57915	1.83731e-20
Glyma.10G163800.Wm82.a4.v1	-	-2.38367	1.12564e-08
Glyma.02G160900.Wm82.a4.v1	(1 of 5) PTHR22950//PTHR22950:SF240 - AMINO ACID TRANSPORTER // TRANSMEMBRANE AMINO ACID TRANSPORTER-RELATED	-1.13657	2.59055e-06
Glyma.11G203400.Wm82.a4.v1	(1 of 5) PTHR31645//PTHR31645:SF1 - FAMILY NOT NAMED // GB|AAD49762.1-RELATED	-5.52135	3.60134e-07
Glyma.08G196900.Wm82.a4.v1	(1 of 15) K14664 - IAA-amino acid hydrolase [EC:3.5.1.-] (ILR1)	-9.74224	2.33864e-16
Glyma.18G058800.Wm82.a4.v1	(1 of 5) PTHR23257//PTHR23257:SF391 - SERINE-THREONINE PROTEIN KINASE // MITOGEN-ACTIVATED PROTEIN KINASE KINASE KINASE MOM-4-RELATED	-1.42592	0.000415005
Glyma.01G081300.Wm82.a4.v1	(1 of 3) 3.2.1.177//3.2.1.37//3.2.1.55 - Alpha-D-xyloside xylohydrolase / Alpha-xylosidase // Xylan 1,4-beta-xylosidase / Xylobiase // Non-reducing end alpha-L-arabinofuranosidase / Arabinosidase	-1.43788	7.86063e-148
Glyma.07G057100.Wm82.a4.v1	(1 of 24) PF11820 - Protein of unknown function (DUF3339) (DUF3339)	-1.18341	0.000424257
Glyma.04G246400.Wm82.a4.v1	(1 of 6) PTHR22950//PTHR22950:SF205 - AMINO ACID TRANSPORTER // AMINO ACID PERMEASE 3-RELATED	-1.1961	1.05159e-15
Glyma.09G062500.Wm82.a4.v1	(1 of 2227) 2.7.11.1 - Non-specific serine/threonine protein kinase / Threonine-specific protein kinase	-7.0285	1.76418e-08
Glyma.08G032100.Wm82.a4.v1	(1 of 4) PTHR27000//PTHR27000:SF4 - FAMILY NOT NAMED // EXTENSIN-LIKE PROTEIN-RELATED	-1.71998	0.00142719
Glyma.20G077300.Wm82.a4.v1	(1 of 4) PTHR31683:SF20 - PECTATE LYASE 1-RELATED	-1.03741	2.11776e-28
Glyma.11G150400.Wm82.a4.v1	(1 of 6) PTHR21495//PTHR21495:SF59 - NUCLEOPORIN-RELATED // DIRIGENT PROTEIN 20-RELATED	-1.24522	9.96373e-73
Glyma.14G126500.Wm82.a4.v1	(1 of 6) PTHR10217:SF504 - POTASSIUM CHANNEL AKT1-RELATED	-6.54928	9.77842e-19
Glyma.03G189800.Wm82.a4.v1	(1 of 33) PF00069//PF08263 - Protein kinase domain (Pkinase) // Leucine rich repeat N-terminal domain (LRRNT_2)	-1.05195	3.52072e-17
Glyma.13G327500.Wm82.a4.v1	(1 of 3) PTHR10593//PTHR10593:SF45 - SERINE/THREONINE-PROTEIN KINASE RIO // SUBFAMILY NOT NAMED	-3.17713	1.14524e-19
Glyma.18G289800.Wm82.a4.v1	(1 of 82) PF04535 - Domain of unknown function (DUF588) (DUF588)	-9.90091	7.33672e-17
Glyma.08G249800.Wm82.a4.v1	(1 of 4) PTHR31673//PTHR31673:SF2 - FAMILY NOT NAMED // COBRA-LIKE PROTEIN 4	-1.16779	5.83046e-27
Glyma.06G102400.Wm82.a4.v1	(1 of 16) KOG0149 - Predicted RNA-binding protein SEB4 (RRM superfamily)	-1.51767	1.07207e-22
Glyma.20G097500.Wm82.a4.v1	(1 of 4) PTHR11850//PTHR11850:SF102 - HOMEOBOX PROTEIN TRANSCRIPTION FACTORS // SUBFAMILY NOT NAMED	-1.87088	3.46141e-16
Glyma.07G185300.Wm82.a4.v1	(1 of 7) PTHR23042:SF61 - TRANSCRIPTION FACTOR BHLH18-RELATED	-1.43051	3.64278e-29
Glyma.04G018900.Wm82.a4.v1	(1 of 2) PTHR21450:SF19 - F5M15.15	-1.56496	5.3666e-10
Glyma.12G032000.Wm82.a4.v1	(1 of 6) PTHR22950//PTHR22950:SF205 - AMINO ACID TRANSPORTER // AMINO ACID PERMEASE 3-RELATED	-1.12734	8.89487e-09
Glyma.05G006500.Wm82.a4.v1	-	-4.57233	0.00514998
Glyma.12G056300.Wm82.a4.v1	(1 of 1) PTHR32467:SF12 - AP2-LIKE ETHYLENE-RESPONSIVE TRANSCRIPTION FACTOR PLT2	-1.16696	0.00104145
Glyma.07G214000.Wm82.a4.v1	(1 of 10) PF02721//PF08646 - Domain of unknown function DUF223 (DUF223) // Replication factor-A C terminal domain (Rep_fac-A_C)	-9.2018	1.17331e-14
Glyma.02G226500.Wm82.a4.v1	(1 of 14) K07300 - Ca2+:H+ antiporter (chaA, CAX)	-2.24418	2.66488e-15
Glyma.06G176100.Wm82.a4.v1	(1 of 6) 1.14.13.120 - Costunolide synthase	-1.18936	0.000289458
Glyma.14G089200.Wm82.a4.v1	(1 of 349) PF00847 - AP2 domain (AP2)	-1.08562	1.68903e-38
Glyma.12G199400.Wm82.a4.v1	(1 of 2) 1.10.9.1 - Plastoquinol--plastocyanin reductase / Cytochrome b6f complex	-1.66334	8.76912e-11
Glyma.17G097100.Wm82.a4.v1	(1 of 4) PTHR11743//PTHR11743:SF35 - VOLTAGE-DEPENDENT ANION-SELECTIVE CHANNEL // SUBFAMILY NOT NAMED	-2.92486	0.00267069
Glyma.13G328900.Wm82.a4.v1	-	-1.5835	0.00371648
Glyma.18G285300.Wm82.a4.v1	-	-6.63066	1.98486e-07
Glyma.03G005700.Wm82.a4.v1	(1 of 4) 2.3.3.13//2.3.3.14 - 2-isopropylmalate synthase / Isopropylmalate synthetase // Homocitrate synthase / Homocitrate synthetase	-1.68854	6.23837e-39
Glyma.12G184800.Wm82.a4.v1	-	-2.61956	0.0092671
Glyma.02G285600.Wm82.a4.v1	(1 of 2) PTHR21535//PTHR21535:SF50 - MAGNESIUM AND COBALT TRANSPORT PROTEIN/MITOCHONDRIAL IMPORT INNER MEMBRANE TRANSLOCASE SUBUNIT TIM8 // SUBFAMILY NOT NAMED	-2.72004	0.00012605
Glyma.08G243300.Wm82.a4.v1	(1 of 87) PF12937 - F-box-like (F-box-like)	-6.68544	1.56305e-07
Glyma.11G066300.Wm82.a4.v1	(1 of 11) PTHR23500:SF154 - POLYOL TRANSPORTER 3-RELATED	-8.05964	2.76434e-11
Glyma.08G131925.Wm82.a4.v1	-	-9.77516	7.27759e-131
Glyma.16G048802.Wm82.a4.v1	(1 of 10) PTHR23421:SF49 - BETA-GALACTOSIDASE 15-RELATED	-4.11395	0.00058078
Glyma.02G036900.Wm82.a4.v1	(1 of 6) PTHR11850//PTHR11850:SF101 - HOMEOBOX PROTEIN TRANSCRIPTION FACTORS // SUBFAMILY NOT NAMED	-2.56624	6.46474e-11
Glyma.06G284900.Wm82.a4.v1	(1 of 6) PTHR13301//PTHR13301:SF69 - X-BOX TRANSCRIPTION FACTOR-RELATED // BASIC HELIX-LOOP-HELIX DOMAIN-CONTAINING PROTEIN	-1.02465	3.60963e-11
Glyma.17G133400.Wm82.a4.v1	(1 of 5) PTHR10795//PTHR10795:SF369 - PROPROTEIN CONVERTASE SUBTILISIN/KEXIN // SUBFAMILY NOT NAMED	-5.71078	1.12689e-07
Glyma.02G282500.Wm82.a4.v1	(1 of 4) PTHR31407:SF6 - OXYGEN-EVOLVING ENHANCER PROTEIN 2-1, CHLOROPLASTIC-RELATED	-1.24942	2.58879e-16
Glyma.17G169200.Wm82.a4.v1	(1 of 4) PTHR31444//PTHR31444:SF8 - FAMILY NOT NAMED // PROTEIN IRREGULAR XYLEM 15-RELATED	-1.03618	1.76166e-10
Glyma.11G223900.Wm82.a4.v1	(1 of 11) PTHR11654//PTHR11654:SF128 - OLIGOPEPTIDE TRANSPORTER-RELATED // SUBFAMILY NOT NAMED	-6.83727	5.91307e-08
Glyma.02G031000.Wm82.a4.v1	(1 of 4) PTHR11119//PTHR11119:SF50 - XANTHINE-URACIL / VITAMIN C PERMEASE FAMILY MEMBER // NUCLEOBASE-ASCORBATE TRANSPORTER 7-RELATED	-2.95376	0.000135022
Glyma.16G196300.Wm82.a4.v1	(1 of 2) PTHR11362//PTHR11362:SF22 - PHOSPHATIDYLETHANOLAMINE-BINDING PROTEIN // PROTEIN BROTHER OF FT AND TFL 1	-1.01717	1.75334e-05
Glyma.19G190600.Wm82.a4.v1	(1 of 10) K13680 - beta-mannan synthase [EC:2.4.1.32] Man b1-4 Man (CSLA)	-1.09781	9.19958e-07
Glyma.07G025800.Wm82.a4.v1	(1 of 8) PTHR31194//PTHR31194:SF4 - SHN SHINE , DNA BINDING / TRANSCRIPTION FACTOR // ETHYLENE-RESPONSIVE TRANSCRIPTION FACTOR ERF003	-4.12591	3.54933e-21
Glyma.14G178400.Wm82.a4.v1	(1 of 17) K10664 - E3 ubiquitin-protein ligase ATL6/9/15/31/42/55 [EC:6.3.2.19] (ATL6S)	-2.0746	0.00422826
Glyma.13G364400.Wm82.a4.v1	(1 of 8) PF02451 - Nodulin (Nodulin)	-14.1551	3.11591e-33
Glyma.10G094800.Wm82.a4.v1	-	-1.71534	1.69888e-09
Glyma.13G326100.Wm82.a4.v1	(1 of 63) K04733 - interleukin-1 receptor-associated kinase 4 (IRAK4)	-1.78313	0.00863795
Glyma.12G092000.Wm82.a4.v1	(1 of 2) K14332 - photosystem I subunit PsaO (psaO)	-2.48497	0.000125171
Glyma.09G277800.Wm82.a4.v1	(1 of 154) K00430 - peroxidase (E1.11.1.7)	-1.48057	1.75334e-65
Glyma.11G219400.Wm82.a4.v1	(1 of 8) PTHR31867//PTHR31867:SF9 - FAMILY NOT NAMED // EXPANSIN-A6	-2.58025	1.37411e-05
Glyma.11G044500.Wm82.a4.v1	-	-1.14261	7.90795e-24
Glyma.04G179400.Wm82.a4.v1	(1 of 5) PF04134 - Protein of unknown function, DUF393 (DUF393)	-2.94135	0.000185601
Glyma.08G120100.Wm82.a4.v1	(1 of 6) PTHR19139:SF144 - AQUAPORIN NIP1-1-RELATED	-4.54559	6.96258e-113
Glyma.05G146400.Wm82.a4.v1	(1 of 1) 3.2.1.106//3.2.1.20 - Mannosyl-oligosaccharide glucosidase / Processing A-glucosidase I // Alpha-glucosidase / Maltase-glucoamylase	-5.38876	3.55778e-42
Glyma.13G295000.Wm82.a4.v1	(1 of 3) 2.6.1.80 - Nicotianamine aminotransferase / Nicotianamine transaminase	-1.92938	7.45802e-74
Glyma.15G040000.Wm82.a4.v1	(1 of 4) PTHR10366//PTHR10366:SF323 - NAD DEPENDENT EPIMERASE/DEHYDRATASE // SUBFAMILY NOT NAMED	-1.01485	2.56943e-61
Glyma.16G014300.Wm82.a4.v1	-	-1.73032	0.00547159
Glyma.17G128000.Wm82.a4.v1	(1 of 3) K01638 - malate synthase (E2.3.3.9, aceB, glcB)	-3.0786	1.05134e-05
Glyma.10G040600.Wm82.a4.v1	(1 of 2) K08903 - photosystem II 13kDa protein (psb28)	-1.8901	0.00437612
Glyma.09G111200.Wm82.a4.v1	(1 of 9) PTHR11937//PTHR11937:SF255 - ACTIN // SUBFAMILY NOT NAMED	-1.56454	3.40999e-18
Glyma.04G207600.Wm82.a4.v1	(1 of 4) PTHR13780:SF48 - CBS DOMAIN-CONTAINING PROTEIN CBSCBSPB1-RELATED	-2.48074	3.96083e-22
Glyma.11G238500.Wm82.a4.v1	(1 of 8) K17469 - sulfate transporter 2, low-affinity (SULTR2)	-9.56359	8.67434e-16
Glyma.10G199000.Wm82.a4.v1	(1 of 5) PTHR22924//PTHR22924:SF39 - LEGHEMOGLOBIN-RELATED // NON-SYMBIOTIC HEMOGLOBIN 2	-12.2934	2.01187e-25
Glyma.11G080300.Wm82.a4.v1	(1 of 4) PTHR31235//PTHR31235:SF67 - FAMILY NOT NAMED // PEROXIDASE 64	-1.53735	2.79199e-44
Glyma.18G121600.Wm82.a4.v1	(1 of 4) PTHR12300//PTHR12300:SF51 - HVA22-LIKE PROTEINS // HVA22-LIKE PROTEIN C	-1.11683	2.09954e-10
Glyma.02G209000.Wm82.a4.v1	(1 of 2) PTHR31356:SF6 - THYLAKOID LUMENAL 29 KDA PROTEIN, CHLOROPLASTIC	-4.99104	0.00102893
Glyma.05G184600.Wm82.a4.v1	(1 of 1) PTHR24073//PTHR24073:SF462//PTHR24073:SF589 - FAMILY NOT NAMED // RAS-RELATED PROTEIN RABG1-RELATED // RAS-RELATED PROTEIN RABG3B-RELATED	-1.16361	0.000894274
Glyma.01G061000.Wm82.a4.v1	-	-2.6052	2.99116e-16
Glyma.11G171900.Wm82.a4.v1	(1 of 5) PTHR31342:SF9 - F10K1.18 PROTEIN	-1.54319	2.69508e-11
Glyma.04G102800.Wm82.a4.v1	(1 of 7) PTHR23500//PTHR23500:SF44 - FAMILY NOT NAMED // SUGAR TRANSPORT PROTEIN 5	-1.10769	0.000803992
Glyma.02G230500.Wm82.a4.v1	(1 of 4) PTHR10366:SF369 - CINNAMOYL-COA REDUCTASE-LIKE PROTEIN	-1.3515	4.22665e-05
Glyma.12G235800.Wm82.a4.v1	(1 of 8) PF00257 - Dehydrin (Dehydrin)	-4.68957	0.00398732
Glyma.03G042800.Wm82.a4.v1	(1 of 4) PTHR11615//PTHR11615:SF144 - NITRATE, FROMATE, IRON DEHYDROGENASE // SUBFAMILY NOT NAMED	-8.3993	2.97302e-12
Glyma.11G061300.Wm82.a4.v1	(1 of 4) K02716 - photosystem II oxygen-evolving enhancer protein 1 (psbO)	-1.1979	4.07245e-17
Glyma.14G165700.Wm82.a4.v1	(1 of 8) K13414 - mitogen-activated protein kinase kinase kinase 1, plant (MEKK1P)	-1.36703	1.3846e-12
Glyma.06G092600.Wm82.a4.v1	(1 of 24) PF12854//PF13041 - PPR repeat (PPR_1) // PPR repeat family (PPR_2)	-1.40538	0.000877706
Glyma.17G152300.Wm82.a4.v1	(1 of 21) PF16913 - Purine nucleobase transmembrane transport (PUNUT)	-7.87919	8.93419e-11
Glyma.16G177500.Wm82.a4.v1	(1 of 4) PTHR12064//PTHR12064:SF36 - ANCIENT CONSERVED DOMAIN PROTEIN-RELATED // SUBFAMILY NOT NAMED	-2.98656	2.67973e-14
Glyma.03G172900.Wm82.a4.v1	(1 of 131) PF00892 - EamA-like transporter family (EamA)	-1.45398	8.98777e-07
Glyma.08G121200.Wm82.a4.v1	(1 of 5) PTHR31062//PTHR31062:SF34 - FAMILY NOT NAMED // XYLOGLUCAN ENDOTRANSGLUCOSYLASE/HYDROLASE PROTEIN 15-RELATED	-2.81923	0.00116673
Glyma.02G174400.Wm82.a4.v1	(1 of 2) PF10183 - ESSS subunit of NADH:ubiquinone oxidoreductase (complex I) (ESSS)	-1.47379	0.000712964
Glyma.01G185500.Wm82.a4.v1	(1 of 4) PTHR31722//PTHR31722:SF5 - FAMILY NOT NAMED // EMB|CAB62433.1|-RELATED	-1.53258	2.86163e-05
Glyma.10G177200.Wm82.a4.v1	(1 of 4) K08916 - light-harvesting complex II chlorophyll a/b binding protein 5 (LHCB5)	-1.75231	1.21996e-07
Glyma.16G162400.Wm82.a4.v1	(1 of 6) 4.4.1.4 - Alliin lyase / L-cysteine sulfoxide lyase	-1.32604	1.85456e-18
Glyma.11G101900.Wm82.a4.v1	(1 of 5) PF00122//PF00689//PF00690//PF00702 - E1-E2 ATPase (E1-E2_ATPase) // Cation transporting ATPase, C-terminus (Cation_ATPase_C) // Cation transporter/ATPase, N-terminus (Cation_ATPase_N) // haloacid dehalogenase-like hydrolase (Hydrolase)	-9.45567	1.37556e-15
Glyma.10G272700.Wm82.a4.v1	-	-1.21252	4.01764e-05
Glyma.02G051700.Wm82.a4.v1	(1 of 6) PTHR23421//PTHR23421:SF79 - BETA-GALACTOSIDASE RELATED // BETA-GALACTOSIDASE 3	-1.03695	1.90422e-24
Glyma.16G001600.Wm82.a4.v1	(1 of 1) PTHR31444//PTHR31444:SF4 - FAMILY NOT NAMED // GLUCURONOXYLAN 4-O-METHYLTRANSFERASE 1	-1.18578	8.56445e-19
Glyma.04G015900.Wm82.a4.v1	(1 of 4) 1.2.1.12//1.2.1.13 - Glyceraldehyde-3-phosphate dehydrogenase (phosphorylating) / Triosephosphate dehydrogenase // Glyceraldehyde-3-phosphate dehydrogenase (NADP(+)) (phosphorylating) / Triosephosphate dehydrogenase (NADP+)	-1.90341	4.41716e-07
Glyma.06G037700.Wm82.a4.v1	(1 of 4) PTHR33348//PTHR33348:SF3 - FAMILY NOT NAMED // C-TERMINALLY ENCODED PEPTIDE 1	-1.51135	1.17292e-16
Glyma.17G006600.Wm82.a4.v1	(1 of 4) PTHR31246:SF5 - MICROTUBULE-ASSOCIATED PROTEIN 70-5	-1.78593	8.03059e-06
Glyma.06G119600.Wm82.a4.v1	-	-3.9765	4.49672e-05
Glyma.08G365000.Wm82.a4.v1	(1 of 1) KOG0157//KOG0158 - Cytochrome P450 CYP4/CYP19/CYP26 subfamilies // Cytochrome P450 CYP3/CYP5/CYP6/CYP9 subfamilies	-1.17267	0.000468102
Glyma.19G150900.Wm82.a4.v1	(1 of 9) PTHR21495//PTHR21495:SF71 - NUCLEOPORIN-RELATED // DIRIGENT PROTEIN 1-RELATED	-1.78112	8.8605e-05
Glyma.05G107000.Wm82.a4.v1	-	-2.44281	5.54324e-11
Glyma.02G249600.Wm82.a4.v1	(1 of 3) PTHR32429:SF12 - RIBULOSE BISPHOSPHATE CARBOXYLASE/OXYGENASE ACTIVASE, CHLOROPLASTIC	-1.24415	8.98975e-13
Glyma.12G143200.Wm82.a4.v1	(1 of 27) PTHR27002//PTHR27002:SF9 - FAMILY NOT NAMED // CYSTEINE-RICH RECEPTOR-LIKE PROTEIN KINASE 27-RELATED	-1.16566	1.65678e-11
Glyma.19G216300.Wm82.a4.v1	(1 of 4) PTHR33921//PTHR33921:SF2 - FAMILY NOT NAMED // CALVIN CYCLE PROTEIN CP12-1, CHLOROPLASTIC-RELATED	-1.61781	9.9017e-05
Glyma.12G089300.Wm82.a4.v1	(1 of 4) PTHR32227:SF70 - GLUCAN ENDO-1,3-BETA-GLUCOSIDASE 14	-1.51553	4.13839e-06
Glyma.16G019400.Wm82.a4.v1	(1 of 1) PTHR31989//PTHR31989:SF39 - FAMILY NOT NAMED // NAC DOMAIN-CONTAINING PROTEIN 12	-1.06419	2.48072e-16
Glyma.14G052300.Wm82.a4.v1	-	-9.02743	4.18662e-14
Glyma.01G214200.Wm82.a4.v1	(1 of 2) K05277 - leucoanthocyanidin dioxygenase (E1.14.11.19)	-1.44602	0.00220055
Glyma.19G155900.Wm82.a4.v1	-	-1.38775	0.00557961
Glyma.11G206700.Wm82.a4.v1	(1 of 32) PF00069//PF01657 - Protein kinase domain (Pkinase) // Salt stress response/antifungal (Stress-antifung)	-1.07027	4.38178e-06
Glyma.17G059100.Wm82.a4.v1	(1 of 68) PF06203 - CCT motif (CCT)	-1.08851	2.73889e-05
Glyma.03G112000.Wm82.a4.v1	(1 of 14) PTHR31190//PTHR31190:SF21 - FAMILY NOT NAMED // ETHYLENE-RESPONSIVE TRANSCRIPTION FACTOR 13	-4.82332	0.000367359
Glyma.15G138800.Wm82.a4.v1	(1 of 8) PTHR22847//PTHR22847:SF478 - WD40 REPEAT PROTEIN // SUBFAMILY NOT NAMED	-7.96129	5.23602e-11
Glyma.01G028500.Wm82.a4.v1	-	-2.74702	3.29827e-54
Glyma.16G072600.Wm82.a4.v1	-	-3.23286	0.00228103
Glyma.12G097700.Wm82.a4.v1	(1 of 3) PTHR11709//PTHR11709:SF106 - MULTI-COPPER OXIDASE // SUBFAMILY NOT NAMED	-1.34724	2.77832e-28
Glyma.17G049800.Wm82.a4.v1	(1 of 4) PTHR31238//PTHR31238:SF21 - FAMILY NOT NAMED // GERMIN-LIKE PROTEIN SUBFAMILY 3 MEMBER 3	-2.31748	3.24522e-150
Glyma.16G216800.Wm82.a4.v1	(1 of 13) PTHR24015//PTHR24015:SF419 - FAMILY NOT NAMED // NUCLEOTIDE-DIPHOSPHO-SUGAR TRANSFERASE DOMAIN-CONTAINING PROTEIN-RELATED	-5.29982	0.000333695
Glyma.13G282900.Wm82.a4.v1	(1 of 6) PTHR23050//PTHR23050:SF170 - CALCIUM BINDING PROTEIN // SUBFAMILY NOT NAMED	-1.30804	0.00192353
Glyma.01G005600.Wm82.a4.v1	(1 of 4) PTHR27000//PTHR27000:SF4 - FAMILY NOT NAMED // EXTENSIN-LIKE PROTEIN-RELATED	-1.09108	0.000151721
Glyma.06G015900.Wm82.a4.v1	(1 of 4) 1.2.1.12//1.2.1.13 - Glyceraldehyde-3-phosphate dehydrogenase (phosphorylating) / Triosephosphate dehydrogenase // Glyceraldehyde-3-phosphate dehydrogenase (NADP(+)) (phosphorylating) / Triosephosphate dehydrogenase (NADP+)	-1.65682	9.09791e-14
Glyma.20G164600.Wm82.a4.v1	(1 of 29) K01183 - chitinase (E3.2.1.14)	-2.16239	4.73134e-07
Glyma.04G047100.Wm82.a4.v1	(1 of 7) PTHR22849:SF6 - U-BOX DOMAIN-CONTAINING PROTEIN 30-RELATED	-1.01816	1.6536e-06
Glyma.15G048400.Wm82.a4.v1	(1 of 5) PTHR21596:SF12 - PROTEIN SUPPRESSOR OF GENE SILENCING 3	-2.61686	2.45375e-05
Glyma.03G166500.Wm82.a4.v1	(1 of 2) PTHR31284:SF15 - HAD SUPERFAMILY, SUBFAMILY IIIB ACID PHOSPHATASE	-1.30203	3.3925e-11
Glyma.10G198700.Wm82.a4.v1	(1 of 1) PTHR13140//PTHR13140:SF480 - MYOSIN // SUBFAMILY NOT NAMED	-7.70573	1.33407e-10
Glyma.08G180900.Wm82.a4.v1	(1 of 4) K15920 - beta-D-xylosidase 4 (XYL4)	-1.80708	1.3254e-63
Glyma.15G276100.Wm82.a4.v1	(1 of 5) PTHR31265:SF2 - F17A17.37 PROTEIN	-1.19227	3.37906e-17
Glyma.09G168400.Wm82.a4.v1	(1 of 4) KOG0498 - K+-channel ERG and related proteins, contain PAS/PAC sensor domain	-1.62031	7.1717e-05
Glyma.12G109700.Wm82.a4.v1	(1 of 2) PTHR12771//PTHR12771:SF17 - ENGULFMENT AND CELL MOTILITY // SUBFAMILY NOT NAMED	-1.59138	1.02994e-09
Glyma.14G089150.Wm82.a4.v1	-	-1.49694	0.00377248
Glyma.03G233300.Wm82.a4.v1	(1 of 6) PTHR13832:SF158 - PROTEIN PHOSPHATASE 2C 5-RELATED	-1.05462	2.86345e-06
Glyma.18G052600.Wm82.a4.v1	-	-2.75611	9.22039e-86
Glyma.10G036800.Wm82.a4.v1	(1 of 3) PTHR24064//PTHR24064:SF279 - FAMILY NOT NAMED // MAJOR FACILITATOR PROTEIN-RELATED	-2.33077	1.36096e-14
Glyma.20G151800.Wm82.a4.v1	(1 of 4) PTHR27000//PTHR27000:SF84 - FAMILY NOT NAMED // LRR RECEPTOR-LIKE SERINE/THREONINE-PROTEIN KINASE ERL1-RELATED	-2.55586	0.00426908
Glyma.10G126100.Wm82.a4.v1	-	-8.28954	3.49261e-12
Glyma.14G001600.Wm82.a4.v1	(1 of 4) PTHR32002//PTHR32002:SF3 - FAMILY NOT NAMED // PROTEIN NLP1-RELATED	-1.23364	3.84515e-05
Glyma.12G060900.Wm82.a4.v1	(1 of 2) PTHR11709//PTHR11709:SF78 - MULTI-COPPER OXIDASE // SUBFAMILY NOT NAMED	-1.26038	3.47401e-13
Glyma.10G034200.Wm82.a4.v1	(1 of 26) PF04576 - Zein-binding (Zein-binding)	-3.93868	0.00938018
Glyma.20G150600.Wm82.a4.v1	(1 of 2) PTHR14154//PTHR14154:SF5 - UPF0041 BRAIN PROTEIN 44-RELATED // EARLY LIGHT-INDUCED PROTEIN 1, CHLOROPLASTIC-RELATED	-1.51716	0
Glyma.19G173800.Wm82.a4.v1	(1 of 131) PF00892 - EamA-like transporter family (EamA)	-1.0899	0.000106213
Glyma.02G206200.Wm82.a4.v1	(1 of 5) PTHR31422//PTHR31422:SF1 - FAMILY NOT NAMED // EXPRESSED PROTEIN	-1.52542	0.00291239
Glyma.09G188400.Wm82.a4.v1	-	-4.9885	0.00106966
Glyma.08G308000.Wm82.a4.v1	(1 of 9) KOG1619 - Cytochrome b	-1.75023	1.65255e-13
Glyma.07G111300.Wm82.a4.v1	(1 of 65) PF03140 - Plant protein of unknown function (DUF247)	-1.06451	1.15976e-06
Glyma.04G137600.Wm82.a4.v1	(1 of 4) PTHR26402//PTHR26402:SF574 - RESPONSE REGULATOR OF TWO-COMPONENT SYSTEM // SUBFAMILY NOT NAMED	-1.02544	0.000690394
Glyma.13G186500.Wm82.a4.v1	(1 of 9) KOG2615 - Permease of the major facilitator superfamily	-1.06124	0.00212645
Glyma.08G263200.Wm82.a4.v1	(1 of 3) PTHR31116:SF2 - 3-METHYLADENINE GLYCOSYLASE I-RELATED	-1.12675	9.55756e-17
Glyma.11G025200.Wm82.a4.v1	(1 of 4) PTHR31775:SF5 - REMORIN FAMILY PROTEIN-RELATED	-1.06725	3.1806e-05
Glyma.18G037533.Wm82.a4.v1	-	-6.0274	7.68395e-06
Glyma.09G188667.Wm82.a4.v1	(1 of 3) PTHR11814:SF54 - SULFATE TRANSPORTER 3.5-RELATED	-9.01477	4.46732e-14
Glyma.06G247100.Wm82.a4.v1	(1 of 2) K00218 - protochlorophyllide reductase (E1.3.1.33, por)	-1.51928	1.44438e-05
Glyma.13G098000.Wm82.a4.v1	-	-1.3224	0.000410445
Glyma.16G014500.Wm82.a4.v1	-	-1.93479	1.01833e-06
Glyma.19G243700.Wm82.a4.v1	(1 of 46) PF00612//PF13178 - IQ calmodulin-binding motif (IQ) // Protein of unknown function (DUF4005) (DUF4005)	-2.03964	0.000216271
Glyma.16G121700.Wm82.a4.v1	(1 of 7) PTHR10869:SF78 - 2-OXOGLUTARATE (2OG) AND FE(II)-DEPENDENT OXYGENASE SUPERFAMILY PROTEIN	-5.59607	1.80781e-25
Glyma.18G247100.Wm82.a4.v1	(1 of 9) PTHR11926//PTHR11926:SF331 - GLUCOSYL/GLUCURONOSYL TRANSFERASES // SUBFAMILY NOT NAMED	-7.68747	1.49284e-10
Glyma.11G235200.Wm82.a4.v1	(1 of 5) PTHR11654:SF155 - PROTEIN NRT1/ PTR FAMILY 5.1	-1.80457	8.96192e-12
Glyma.14G177600.Wm82.a4.v1	(1 of 85) PF02298 - Plastocyanin-like domain (Cu_bind_like)	-1.18691	1.4455e-52
Glyma.06G174700.Wm82.a4.v1	(1 of 4) PTHR31683//PTHR31683:SF28 - FAMILY NOT NAMED // PECTATE LYASE 22-RELATED	-1.30658	7.61936e-09
Glyma.07G133900.Wm82.a4.v1	(1 of 6) PTHR11709//PTHR11709:SF66 - MULTI-COPPER OXIDASE // LACCASE-17	-1.4409	5.94689e-30
Glyma.16G067000.Wm82.a4.v1	(1 of 6) PTHR31874:SF1 - CCT MOTIF FAMILY PROTEIN-RELATED	-1.15899	9.58604e-06
Glyma.13G328800.Wm82.a4.v1	(1 of 8) PF02451 - Nodulin (Nodulin)	-12.3101	1.70439e-25
Glyma.01G007000.Wm82.a4.v1	(1 of 4) PTHR32295//PTHR32295:SF22 - FAMILY NOT NAMED // PROTEIN IQ-DOMAIN 25	-1.69254	4.01683e-07
Glyma.18G253800.Wm82.a4.v1	(1 of 2) PTHR24326:SF269 - HOMEOBOX-LEUCINE ZIPPER PROTEIN ATHB-4	-1.86519	0.0056714
Glyma.01G148800.Wm82.a4.v1	(1 of 3) PF11947 - Protein of unknown function (DUF3464) (DUF3464)	-1.14838	2.09908e-07
Glyma.10G198800.Wm82.a4.v1	(1 of 5) PTHR22924//PTHR22924:SF39 - LEGHEMOGLOBIN-RELATED // NON-SYMBIOTIC HEMOGLOBIN 2	-11.5633	1.0956e-22
Glyma.11G030700.Wm82.a4.v1	(1 of 6) PF00805 - Pentapeptide repeats (8 copies) (Pentapeptide)	-1.03278	0.00218055
Glyma.03G191700.Wm82.a4.v1	(1 of 3) PTHR21654//PTHR21654:SF5 - FAMILY NOT NAMED // TRIHELIX TRANSCRIPTION FACTOR PTL	-2.08465	4.83181e-20
Glyma.06G262400.Wm82.a4.v1	(1 of 57) PF00954//PF01453//PF07714//PF08276 - S-locus glycoprotein domain (S_locus_glycop) // D-mannose binding lectin (B_lectin) // Protein tyrosine kinase (Pkinase_Tyr) // PAN-like domain (PAN_2)	-2.77295	1.55041e-09
Glyma.12G054400.Wm82.a4.v1	(1 of 38) K01188 - beta-glucosidase (E3.2.1.21)	-1.06582	1.85332e-05
Glyma.16G046651.Wm82.a4.v1	-	-4.47884	0.00152265
Glyma.09G188733.Wm82.a4.v1	(1 of 3) PTHR11814:SF54 - SULFATE TRANSPORTER 3.5-RELATED	-10.1016	1.56e-17
Glyma.03G180000.Wm82.a4.v1	(1 of 36) PTHR32077//PTHR32077:SF7 - FAMILY NOT NAMED // FASCICLIN-LIKE ARABINOGALACTAN PROTEIN 11	-1.21627	3.97451e-24
Glyma.04G090100.Wm82.a4.v1	(1 of 4) PTHR31945:SF6 - TRANSCRIPTION FACTOR BHLH61-RELATED	-2.20051	1.62407e-55
Glyma.13G219300.Wm82.a4.v1	-	-2.93817	0.00984174
Glyma.13G236100.Wm82.a4.v1	-	-1.28406	2.40611e-95
Glyma.20G096700.Wm82.a4.v1	(1 of 4) PTHR23244//PTHR23244:SF294 - KELCH REPEAT DOMAIN // SUBFAMILY NOT NAMED	-1.2045	0.00977098
Glyma.11G224400.Wm82.a4.v1	(1 of 5) PF00854//PF07690 - POT family (PTR2) // Major Facilitator Superfamily (MFS_1)	-3.05663	9.46011e-13
Glyma.07G109600.Wm82.a4.v1	(1 of 3) PTHR31251:SF4 - SQUAMOSA PROMOTER-BINDING-LIKE PROTEIN 8	-2.09792	1.35086e-07
Glyma.07G249000.Wm82.a4.v1	(1 of 5) PTHR11064:SF42 - NUCLEAR TRANSCRIPTION FACTOR Y SUBUNIT B-5	-4.02603	3.24129e-05
Glyma.02G210600.Wm82.a4.v1	(1 of 17) K10664 - E3 ubiquitin-protein ligase ATL6/9/15/31/42/55 [EC:6.3.2.19] (ATL6S)	-8.08475	2.48311e-11
Glyma.02G265200.Wm82.a4.v1	-	-10.6585	2.05965e-19
Glyma.02G119300.Wm82.a4.v1	-	-2.38949	4.53029e-15
Glyma.03G022200.Wm82.a4.v1	(1 of 4) PTHR33601//PTHR33601:SF1 - FAMILY NOT NAMED // LITTLE ZIPPER 1 PROTEIN-RELATED	-1.51562	0.00127827
Glyma.06G157200.Wm82.a4.v1	(1 of 1) PTHR23421//PTHR23421:SF67 - BETA-GALACTOSIDASE RELATED // BETA-GALACTOSIDASE 10	-1.89281	6.28398e-32
Glyma.03G125000.Wm82.a4.v1	(1 of 20) PTHR24078:SF177 - PROTEIN DNJ-23-RELATED	-1.38223	0.00228786
Glyma.10G102100.Wm82.a4.v1	(1 of 6) PTHR11802//PTHR11802:SF94 - SERINE PROTEASE FAMILY S10 SERINE CARBOXYPEPTIDASE // SUBFAMILY NOT NAMED	-1.4606	8.69387e-42
Glyma.13G348500.Wm82.a4.v1	(1 of 6) PTHR31250:SF13 - CALMODULIN-BINDING PROTEIN	-5.64555	4.03671e-38
Glyma.06G176700.Wm82.a4.v1	(1 of 30) PF05910 - Plant protein of unknown function (DUF868) (DUF868)	-1.34356	0.000265159
Glyma.17G010200.Wm82.a4.v1	(1 of 4) PTHR11850//PTHR11850:SF100 - HOMEOBOX PROTEIN TRANSCRIPTION FACTORS // HOMEOBOX PROTEIN SHOOT MERISTEMLESS	-1.0199	0.00741577
Glyma.10G199100.Wm82.a4.v1	(1 of 5) PTHR22924//PTHR22924:SF39 - LEGHEMOGLOBIN-RELATED // NON-SYMBIOTIC HEMOGLOBIN 2	-11.9186	5.73867e-24
Glyma.19G222200.Wm82.a4.v1	(1 of 4) PTHR10641//PTHR10641:SF465 - MYB-LIKE DNA-BINDING PROTEIN MYB // MYB TRANSCRIPTION FACTOR	-1.12253	0.00469729
Glyma.13G113500.Wm82.a4.v1	(1 of 4) PTHR31374//PTHR31374:SF22 - FAMILY NOT NAMED // AUXIN-RESPONSIVE PROTEIN-LIKE PROTEIN-RELATED	-1.43328	0.000121802
Glyma.20G142100.Wm82.a4.v1	(1 of 29) PTHR23177 - MKIAA1688 PROTEIN	-1.08929	6.5461e-15
Glyma.17G238400.Wm82.a4.v1	(1 of 4) PTHR10177//PTHR10177:SF242 - CYCLINE // SUBFAMILY NOT NAMED	-1.57594	1.81076e-20
Glyma.13G172600.Wm82.a4.v1	(1 of 2) PTHR24072//PTHR24072:SF178 - RHO FAMILY GTPASE // SUBFAMILY NOT NAMED	-1.03902	3.07254e-07
Glyma.02G224600.Wm82.a4.v1	(1 of 4) PTHR11654//PTHR11654:SF166 - OLIGOPEPTIDE TRANSPORTER-RELATED // SUBFAMILY NOT NAMED	-1.62053	2.21208e-05
Glyma.05G069701.Wm82.a4.v1	(1 of 21) PF16913 - Purine nucleobase transmembrane transport (PUNUT)	-6.65273	1.77141e-07
Glyma.16G209100.Wm82.a4.v1	(1 of 65) PF03140 - Plant protein of unknown function (DUF247)	-5.37141	0.000204065
Glyma.07G039050.Wm82.a4.v1	(1 of 37) PF00190 - Cupin (Cupin_1)	-1.37208	2.76209e-36
Glyma.08G206200.Wm82.a4.v1	-	-5.15606	0.000455574
Glyma.17G008500.Wm82.a4.v1	-	-1.86309	3.87658e-31
Glyma.15G062700.Wm82.a4.v1	(1 of 10) K13449 - pathogenesis-related protein 1 (PR1)	-4.11766	7.70839e-21
Glyma.11G024100.Wm82.a4.v1	(1 of 4) PTHR11592//PTHR11592:SF42 - GLUTATHIONE PEROXIDASE // SUBFAMILY NOT NAMED	-2.2838	0.000216871
Glyma.05G083900.Wm82.a4.v1	-	-1.51892	5.94844e-06
Glyma.15G220600.Wm82.a4.v1	(1 of 2) PTHR32133:SF127 - F-BOX ASSOCIATED UBIQUITINATION EFFECTOR FAMILY PROTEIN-RELATED	-6.37477	8.00907e-07
Glyma.01G077000.Wm82.a4.v1	(1 of 5) PTHR31692//PTHR31692:SF3 - FAMILY NOT NAMED // BETA EXPANSIN 6-RELATED	-1.27145	3.42354e-05
Glyma.01G128300.Wm82.a4.v1	(1 of 3) K14685 - solute carrier family 40 (iron-regulated transporter), member 1 (SLC40A1, FPN1)	-6.59026	3.15518e-10
Glyma.19G188700.Wm82.a4.v1	(1 of 3) PTHR24012//PTHR24012:SF455 - FAMILY NOT NAMED // POLYADENYLATE-BINDING PROTEIN 7	-6.06508	5.10325e-06
Glyma.03G218700.Wm82.a4.v1	(1 of 4) PTHR30620//PTHR30620:SF4 - PERIPLASMIC BETA-GLUCOSIDASE-RELATED // BETA-D-XYLOSIDASE 2-RELATED	-1.0899	3.98532e-23
Glyma.07G018000.Wm82.a4.v1	(1 of 5) PTHR19139//PTHR19139:SF99 - AQUAPORIN TRANSPORTER // AQUAPORIN TIP2-1	-1.02458	4.42783e-15
Glyma.02G052000.Wm82.a4.v1	(1 of 1) PTHR10108//PTHR10108:SF797 - METHYLTRANSFERASE // METHYLTRANSFERASE PMT27-RELATED	-2.6397	0.000187029
Glyma.07G144100.Wm82.a4.v1	(1 of 120) PF00560//PF08263//PF13855 - Leucine Rich Repeat (LRR_1) // Leucine rich repeat N-terminal domain (LRRNT_2) // Leucine rich repeat (LRR_8)	-1.62298	2.82509e-07
Glyma.18G183700.Wm82.a4.v1	(1 of 2) PTHR11709:SF62 - LACCASE-2	-1.47922	1.21558e-15
Glyma.03G144400.Wm82.a4.v1	(1 of 3) PTHR33493//PTHR33493:SF2 - FAMILY NOT NAMED // LATE EMBRYOGENESIS ABUNDANT PROTEIN 4-5	-4.76664	2.12246e-05
Glyma.20G203800.Wm82.a4.v1	-	-2.86692	6.22942e-111
Glyma.17G042800.Wm82.a4.v1	(1 of 2) PTHR31734//PTHR31734:SF3 - FAMILY NOT NAMED // AUXIN-RESPONSIVE PROTEIN IAA31	-1.1994	0.000102497
Glyma.13G341500.Wm82.a4.v1	(1 of 8) PTHR27000:SF151 - DNA-DAMAGE-REPAIR/TOLERATION PROTEIN DRT100-RELATED	-1.03253	8.9186e-06
Glyma.04G172500.Wm82.a4.v1	(1 of 6) PTHR12565//PTHR12565:SF148 - STEROL REGULATORY ELEMENT-BINDING PROTEIN // PROTEIN BANQUO 3	-1.36489	1.39814e-07
Glyma.07G057600.Wm82.a4.v1	(1 of 4) PTHR32285:SF9 - PROTEIN TRICHOME BIREFRINGENCE-LIKE 25-RELATED	-1.70679	0.00116277
Glyma.19G038100.Wm82.a4.v1	(1 of 4) PTHR10641//PTHR10641:SF577 - MYB-LIKE DNA-BINDING PROTEIN MYB // SUBFAMILY NOT NAMED	-1.37722	0.00832716
Glyma.12G159800.Wm82.a4.v1	-	-2.22938	1.90754e-06
Glyma.18G173300.Wm82.a4.v1	-	-1.87298	2.13546e-14
Glyma.20G237200.Wm82.a4.v1	(1 of 4) PTHR33565//PTHR33565:SF1 - FAMILY NOT NAMED // DORMANCY/AUXIN ASSOCIATED PROTEIN	-1.24931	0.00399055
Glyma.06G321900.Wm82.a4.v1	(1 of 2) K08905 - photosystem I subunit V (psaG)	-1.09159	0.00278564
Glyma.13G163000.Wm82.a4.v1	(1 of 5) PTHR14363//PTHR14363:SF16 - HEPARANASE-RELATED // HEPARANASE-LIKE PROTEIN 3	-1.10265	8.47559e-10
Glyma.18G033900.Wm82.a4.v1	(1 of 11) PTHR11654//PTHR11654:SF128 - OLIGOPEPTIDE TRANSPORTER-RELATED // SUBFAMILY NOT NAMED	-5.62969	4.64721e-05
Glyma.06G214700.Wm82.a4.v1	(1 of 1) PTHR11220//PTHR11220:SF35 - HEME-BINDING PROTEIN-RELATED // SOUL HEME-BINDING PROTEIN	-1.18002	3.90142e-05
Glyma.01G215700.Wm82.a4.v1	(1 of 2) K16250 - DNA-directed RNA polymerase IV subunit 1 [EC:2.7.7.6] (NRPD1)	-1.18018	0.000261164
Glyma.02G144400.Wm82.a4.v1	(1 of 4) PTHR10593//PTHR10593:SF20 - SERINE/THREONINE-PROTEIN KINASE RIO // INDETERMINATE-DOMAIN 12 PROTEIN	-2.17441	1.65613e-13
Glyma.15G067200.Wm82.a4.v1	(1 of 4) PTHR23315:SF56 - ARMADILLO/BETA-CATENIN-LIKE REPEAT-CONTAINING PROTEIN	-1.16646	3.58124e-06
Glyma.06G000400.Wm82.a4.v1	(1 of 4) PTHR32002//PTHR32002:SF3 - FAMILY NOT NAMED // PROTEIN NLP1-RELATED	-7.04259	6.07926e-09
Glyma.05G009200.Wm82.a4.v1	(1 of 3) PTHR24351//PTHR24351:SF70 - RIBOSOMAL PROTEIN S6 KINASE // PROTEIN KINASE PINOID 2	-2.30684	2.3739e-21
Glyma.15G139600.Wm82.a4.v1	(1 of 6) PTHR22835//PTHR22835:SF153 - ZINC FINGER FYVE DOMAIN CONTAINING PROTEIN // SUBFAMILY NOT NAMED	-1.09524	3.64649e-27
Glyma.05G161200.Wm82.a4.v1	(1 of 2) PTHR31161:SF7 - F28N24.3 PROTEIN	-1.13751	9.57248e-14
Glyma.17G085200.Wm82.a4.v1	(1 of 74) PF00582 - Universal stress protein family (Usp)	-6.76288	8.60367e-08
Glyma.09G039800.Wm82.a4.v1	-	-1.04924	1.96282e-06
Glyma.03G220000.Wm82.a4.v1	-	-1.11839	0.000670997
Glyma.07G230300.Wm82.a4.v1	(1 of 4) PTHR10759//PTHR10759:SF9 - 60S RIBOSOMAL PROTEIN L34 // SUBFAMILY NOT NAMED	-2.01943	2.43748e-07
Glyma.13G024700.Wm82.a4.v1	(1 of 4) 2.3.3.13//2.3.3.14 - 2-isopropylmalate synthase / Isopropylmalate synthetase // Homocitrate synthase / Homocitrate synthetase	-7.98675	4.80589e-11
Glyma.17G119400.Wm82.a4.v1	(1 of 4) PTHR22891//PTHR22891:SF25 - EUKARYOTIC TRANSLATION INITIATION FACTOR 2C // SUBFAMILY NOT NAMED	-1.70273	1.09265e-11
Glyma.08G076800.Wm82.a4.v1	(1 of 131) PF00892 - EamA-like transporter family (EamA)	-3.64438	1.19563e-35
Glyma.11G071800.Wm82.a4.v1	(1 of 6) PTHR23070//PTHR23070:SF12 - BCS1 AAA-TYPE ATPASE // SUBFAMILY NOT NAMED	-2.24863	0.000145545
Glyma.13G087400.Wm82.a4.v1	(1 of 4) PTHR10551//PTHR10551:SF12 - FASCIN // SUBFAMILY NOT NAMED	-1.03551	5.5509e-57
Glyma.05G151200.Wm82.a4.v1	(1 of 2) 6.2.1.20 - Long-chain-fatty-acid--[acyl-carrier-protein] ligase / Acyl-[acyl-carrier-protein] synthetase	-1.35346	0.000905781
Glyma.06G198100.Wm82.a4.v1	(1 of 5) PTHR23023:SF86 - FLAVIN-CONTAINING MONOOXYGENASE FMO GS-OX-LIKE 8-RELATED	-1.53214	1.22514e-09
Glyma.11G224200.Wm82.a4.v1	(1 of 5) PF00854//PF07690 - POT family (PTR2) // Major Facilitator Superfamily (MFS_1)	-1.44218	1.33977e-33
Glyma.02G106300.Wm82.a4.v1	(1 of 6) 1.14.19.4 - Delta(8)-fatty-acid desaturase / SLD	-1.38582	5.0855e-14
Glyma.10G109200.Wm82.a4.v1	(1 of 11) PTHR27002//PTHR27002:SF51 - FAMILY NOT NAMED // CYSTEINE-RICH RECEPTOR-LIKE PROTEIN KINASE 25-RELATED	-1.18119	0.00659728
Glyma.05G114000.Wm82.a4.v1	(1 of 2) PTHR31683:SF29 - PECTATE LYASE 11-RELATED	-1.13781	8.97535e-28
Glyma.03G123100.Wm82.a4.v1	(1 of 2) PTHR31407:SF14 - PSBP DOMAIN-CONTAINING PROTEIN 6, CHLOROPLASTIC	-1.31929	0.000326767
Glyma.13G362800.Wm82.a4.v1	(1 of 14) PF04862 - Protein of unknown function (DUF642) (DUF642)	-1.08536	1.1432e-62
Glyma.17G232290.Wm82.a4.v1	(1 of 1) PTHR32467//PTHR32467:SF11 - FAMILY NOT NAMED // AP2-LIKE ETHYLENE-RESPONSIVE TRANSCRIPTION FACTOR ANT	-1.18084	1.34523e-19
Glyma.08G297500.Wm82.a4.v1	(1 of 8) PTHR32295//PTHR32295:SF14 - FAMILY NOT NAMED // PROTEIN IQ-DOMAIN 31-RELATED	-1.03236	2.02941e-09
Glyma.13G117100.Wm82.a4.v1	(1 of 2) PTHR31734//PTHR31734:SF3 - FAMILY NOT NAMED // AUXIN-RESPONSIVE PROTEIN IAA31	-1.58309	0.00128666
Glyma.05G022900.Wm82.a4.v1	(1 of 1) K02694 - photosystem I subunit III (psaF)	-1.22688	7.72275e-27
Glyma.06G142300.Wm82.a4.v1	(1 of 2) PTHR26402//PTHR26402:SF521 - RESPONSE REGULATOR OF TWO-COMPONENT SYSTEM // TWO-COMPONENT RESPONSE REGULATOR ARR16-RELATED	-4.192	0.00377095
Glyma.02G259300.Wm82.a4.v1	(1 of 4) PTHR31388:SF24 - PEROXIDASE 52	-2.60921	3.87858e-109
Glyma.08G327200.Wm82.a4.v1	(1 of 150) KOG0156 - Cytochrome P450 CYP2 subfamily	-2.02705	2.09629e-10
Glyma.07G113100.Wm82.a4.v1	(1 of 17) KOG2722 - Predicted membrane protein	-8.73384	3.1619e-13
Glyma.04G076500.Wm82.a4.v1	(1 of 11) 2.4.1.168//2.4.2.39 - Xyloglucan 4-glucosyltransferase // Xyloglucan 6-xylosyltransferase / Xyloglucan 6-alpha-D-xylosyltransferase	-1.34095	1.52733e-14
Glyma.07G210000.Wm82.a4.v1	-	-1.79632	0.00529429
Glyma.04G055300.Wm82.a4.v1	(1 of 5) PTHR34455//PTHR34455:SF1 - FAMILY NOT NAMED // EXPRESSED PROTEIN	-1.27447	4.02668e-16
Glyma.17G068300.Wm82.a4.v1	(1 of 2) PTHR14155:SF80 - RING-H2 FINGER PROTEIN ATL13-RELATED	-1.08166	2.66326e-08
Glyma.11G169800.Wm82.a4.v1	(1 of 5) PTHR31342:SF9 - F10K1.18 PROTEIN	-1.2857	2.57998e-19
Glyma.01G028300.Wm82.a4.v1	(1 of 6) PTHR11850//PTHR11850:SF101 - HOMEOBOX PROTEIN TRANSCRIPTION FACTORS // SUBFAMILY NOT NAMED	-1.64885	0.000544721
Glyma.12G165200.Wm82.a4.v1	(1 of 2) PTHR24056//PTHR24056:SF203 - CELL DIVISION PROTEIN KINASE // PROTEIN KINASE SUPERFAMILY PROTEIN	-1.24713	0.00167361
Glyma.15G234300.Wm82.a4.v1	(1 of 4) PTHR13683//PTHR13683:SF258 - ASPARTYL PROTEASES // ASPARTYL PROTEASE FAMILY PROTEIN-RELATED	-1.12845	1.89545e-51
Glyma.19G174400.Wm82.a4.v1	(1 of 6) PTHR33431:SF2 - GB|AAD24366.1	-1.79622	0.002368
Glyma.16G155200.Wm82.a4.v1	(1 of 5) PTHR12136:SF41 - PLECKSTRIN HOMOLOGY (PH) AND LIPID-BINDING START DOMAIN-CONTAINING PROTEIN	-3.53338	1.6357e-28
Glyma.02G060900.Wm82.a4.v1	(1 of 80) PF14009 - Domain of unknown function (DUF4228) (DUF4228)	-2.64574	0.00322676
Glyma.06G106200.Wm82.a4.v1	(1 of 8) K17469 - sulfate transporter 2, low-affinity (SULTR2)	-1.21127	0.00536337
Glyma.09G249200.Wm82.a4.v1	(1 of 2) PTHR10438//PTHR10438:SF258 - THIOREDOXIN // THIOREDOXIN F1, CHLOROPLASTIC-RELATED	-1.00373	3.73329e-06
Glyma.19G217700.Wm82.a4.v1	(1 of 1) 2.4.1.67 - Galactinol--raffinose galactosyltransferase / Stachyose synthetase	-1.17551	7.39889e-17
Glyma.09G187000.Wm82.a4.v1	(1 of 2) PTHR15907//PTHR15907:SF47 - FAMILY NOT NAMED // PROTEIN PLANT CADMIUM RESISTANCE 11-RELATED	-8.75042	1.53994e-25
Glyma.12G216500.Wm82.a4.v1	-	-2.22525	4.39032e-05
Glyma.16G164300.Wm82.a4.v1	(1 of 182) 1.11.1.7 - Peroxidase / Lactoperoxidase	-8.17973	7.45322e-12
Glyma.07G258100.Wm82.a4.v1	-	-1.08268	3.39814e-06
Glyma.11G066000.Wm82.a4.v1	(1 of 11) PTHR23500:SF154 - POLYOL TRANSPORTER 3-RELATED	-9.78753	1.73706e-16
Glyma.06G170300.Wm82.a4.v1	(1 of 3) PTHR22953//PTHR22953:SF33 - ACID PHOSPHATASE RELATED // SUBFAMILY NOT NAMED	-1.36048	4.6503e-86
Glyma.12G043800.Wm82.a4.v1	(1 of 3) PTHR32227:SF16 - GLUCAN ENDO-1,3-BETA-GLUCOSIDASE 7-RELATED	-1.14427	0.0019902
Glyma.11G030000.Wm82.a4.v1	(1 of 78) PF00069//PF00560//PF08263//PF13855 - Protein kinase domain (Pkinase) // Leucine Rich Repeat (LRR_1) // Leucine rich repeat N-terminal domain (LRRNT_2) // Leucine rich repeat (LRR_8)	-1.31619	4.76787e-24
Glyma.19G255800.Wm82.a4.v1	(1 of 4) PTHR23130:SF97 - CYTOCHROME B561/FERRIC REDUCTASE TRANSMEMBRANE WITH DOMON RELATED DOMAIN	-1.12665	1.96567e-37
Glyma.02G068900.Wm82.a4.v1	(1 of 6) PTHR31062//PTHR31062:SF15 - FAMILY NOT NAMED // XYLOGLUCAN ENDOTRANSGLUCOSYLASE/HYDROLASE PROTEIN 4-RELATED	-2.52679	1.3356e-10
Glyma.12G129500.Wm82.a4.v1	(1 of 154) K00430 - peroxidase (E1.11.1.7)	-1.75814	4.51648e-10
Glyma.09G037600.Wm82.a4.v1	-	-3.58401	0.00459052
Glyma.20G236100.Wm82.a4.v1	(1 of 5) PTHR23213//PTHR23213:SF177 - FORMIN-RELATED // FORMIN-LIKE PROTEIN 11	-1.10188	0.00182135
Glyma.13G095000.Wm82.a4.v1	(1 of 9) PTHR31062//PTHR31062:SF32 - FAMILY NOT NAMED // XYLOGLUCAN ENDOTRANSGLUCOSYLASE/HYDROLASE PROTEIN 25-RELATED	-1.92705	0.000203095
Glyma.06G307100.Wm82.a4.v1	(1 of 3) PTHR11709//PTHR11709:SF106 - MULTI-COPPER OXIDASE // SUBFAMILY NOT NAMED	-1.06693	1.37949e-27
Glyma.17G083000.Wm82.a4.v1	-	-6.50882	3.76558e-07
Glyma.03G128600.Wm82.a4.v1	(1 of 7) K14508 - regulatory protein NPR1 (NPR1)	-1.10644	1.56543e-10
Glyma.16G149600.Wm82.a4.v1	(1 of 65) PF05553 - Cotton fibre expressed protein (DUF761)	-1.27175	0.00298944
Glyma.13G229800.Wm82.a4.v1	(1 of 112) PF13839//PF14416 - GDSL/SGNH-like Acyl-Esterase family found in Pmr5 and Cas1p (PC-Esterase) // PMR5 N terminal Domain (PMR5N)	-1.11357	0.000166111
Glyma.05G029700.Wm82.a4.v1	(1 of 4) PTHR11743//PTHR11743:SF35 - VOLTAGE-DEPENDENT ANION-SELECTIVE CHANNEL // SUBFAMILY NOT NAMED	-2.01421	0.000653473
Glyma.20G159400.Wm82.a4.v1	(1 of 4) PTHR33649:SF2 - PAR1 PROTEIN	-2.05104	3.4067e-12
Glyma.04G214400.Wm82.a4.v1	(1 of 6) PTHR11183:SF56 - UDP-GLUCURONATE:XYLAN ALPHA-GLUCURONOSYLTRANSFERASE 3-RELATED	-1.45997	2.21333e-16
Glyma.07G135800.Wm82.a4.v1	-	-5.9063	2.80748e-08
Glyma.19G176600.Wm82.a4.v1	(1 of 5) PTHR13832:SF367 - PROTEIN PHOSPHATASE 2C 67-RELATED	-1.32697	3.82666e-05
Glyma.19G251500.Wm82.a4.v1	(1 of 1) PTHR10795:SF393 - CUCUMISIN	-6.1492	6.67181e-46
Glyma.13G290600.Wm82.a4.v1	(1 of 4) PTHR31165//PTHR31165:SF10 - FAMILY NOT NAMED // PROTEIN LIGHT-DEPENDENT SHORT HYPOCOTYLS 10-RELATED	-1.12964	6.84862e-51
Glyma.05G226900.Wm82.a4.v1	(1 of 4) PTHR21068:SF5 - GENOMIC DNA, CHROMOSOME 3, P1 CLONE: MIL23-RELATED	-1.2916	0.000328901
Glyma.19G165300.Wm82.a4.v1	(1 of 25) PF04852 - Protein of unknown function (DUF640) (DUF640)	-4.66698	4.25489e-05
Glyma.10G091800.Wm82.a4.v1	(1 of 6) PTHR10024//PTHR10024:SF243 - SYNAPTOTAGMIN // ANTHRANILATE PHOSPHORIBOSYLTRANSFERASE-LIKE PROTEIN	-1.18428	2.12939e-12
Glyma.10G130400.Wm82.a4.v1	(1 of 5) PTHR23111:SF23 - ZINC FINGER (RAN-BINDING) DOMAIN-CONTAINING PROTEIN	-1.02422	1.20574e-05
Glyma.14G095400.Wm82.a4.v1	(1 of 6) 1.14.19.4 - Delta(8)-fatty-acid desaturase / SLD	-1.03193	1.11849e-08
Glyma.13G331200.Wm82.a4.v1	(1 of 5) PTHR31964//PTHR31964:SF16 - FAMILY NOT NAMED // ADENINE NUCLEOTIDE ALPHA HYDROLASES-LIKE PROTEIN	-8.61453	7.06453e-13
Glyma.20G187400.Wm82.a4.v1	(1 of 6) PTHR19241//PTHR19241:SF261 - ATP-BINDING CASSETTE TRANSPORTER // SUBFAMILY NOT NAMED	-1.92934	1.05483e-10
Glyma.04G008300.Wm82.a4.v1	(1 of 4) PTHR11627:SF16 - FRUCTOSE-BISPHOSPHATE ALDOLASE 1, CHLOROPLASTIC-RELATED	-1.06317	2.87959e-05
Glyma.08G262800.Wm82.a4.v1	(1 of 3) 3.2.1.177//3.2.1.37//3.2.1.55 - Alpha-D-xyloside xylohydrolase / Alpha-xylosidase // Xylan 1,4-beta-xylosidase / Xylobiase // Non-reducing end alpha-L-arabinofuranosidase / Arabinosidase	-1.53698	1.76576e-31
Glyma.08G347032.Wm82.a4.v1	(1 of 4) KOG0058 - Peptide exporter, ABC superfamily	-2.11505	0.00184239
Glyma.10G021300.Wm82.a4.v1	(1 of 4) PTHR10168//PTHR10168:SF57 - GLUTAREDOXIN // GLUTAREDOXIN-C13-RELATED	-1.84765	0.000539311
Glyma.16G217900.Wm82.a4.v1	(1 of 10) K01177 - beta-amylase (E3.2.1.2)	-1.05149	1.63928e-08
Glyma.18G147700.Wm82.a4.v1	(1 of 4) PTHR11119:SF54 - NUCLEOBASE-ASCORBATE TRANSPORTER 11	-1.58038	6.61118e-21
Glyma.17G110500.Wm82.a4.v1	(1 of 2) PTHR11062//PTHR11062:SF106 - EXOSTOSIN HEPARAN SULFATE GLYCOSYLTRANSFERASE -RELATED // SUBFAMILY NOT NAMED	-1.12237	0.000388675
Glyma.13G024900.Wm82.a4.v1	(1 of 11) 2.3.3.13 - 2-isopropylmalate synthase / Isopropylmalate synthetase	-5.30953	0.000228196
Glyma.10G089300.Wm82.a4.v1	(1 of 2) PTHR34940:SF1 - PHOTOSYSTEM II 5 KDA PROTEIN, CHLOROPLASTIC	-1.62175	0.00824498
Glyma.20G142700.Wm82.a4.v1	-	-1.37649	1.51922e-11
Glyma.17G100700.Wm82.a4.v1	(1 of 3) 1.3.1.83 - Geranylgeranyl diphosphate reductase / Geranylgeranyl reductase	-1.28848	2.43047e-13
Glyma.03G231100.Wm82.a4.v1	(1 of 4) PTHR11850//PTHR11850:SF102 - HOMEOBOX PROTEIN TRANSCRIPTION FACTORS // SUBFAMILY NOT NAMED	-1.11131	1.6528e-22
Glyma.10G032200.Wm82.a4.v1	(1 of 4) K02721 - photosystem II PsbW protein (psbW)	-1.24051	1.08137e-08
Glyma.12G101800.Wm82.a4.v1	(1 of 4) PTHR31062:SF11 - XYLOGLUCAN ENDOTRANSGLUCOSYLASE/HYDROLASE PROTEIN 9	-1.26347	2.07976e-32
Glyma.13G041600.Wm82.a4.v1	-	-3.49963	0.00634442
Glyma.15G118500.Wm82.a4.v1	(1 of 4) PTHR22814//PTHR22814:SF94 - COPPER TRANSPORT PROTEIN ATOX1-RELATED // SUBFAMILY NOT NAMED	-1.52095	9.08296e-10
Glyma.15G139400.Wm82.a4.v1	-	-2.0773	0.00375973
Glyma.08G076500.Wm82.a4.v1	-	-9.04819	3.9023e-14
Glyma.03G056200.Wm82.a4.v1	(1 of 4) PTHR32285//PTHR32285:SF7 - FAMILY NOT NAMED // PROTEIN TRICHOME BIREFRINGENCE-LIKE 3	-1.30257	1.22342e-14
Glyma.20G085900.Wm82.a4.v1	-	-1.61678	0.000313461
Glyma.10G186700.Wm82.a4.v1	-	-1.19231	0
Glyma.12G148200.Wm82.a4.v1	(1 of 2) PTHR27003//PTHR27003:SF37 - FAMILY NOT NAMED // INTERLEUKIN-1 RECEPTOR-ASSOCIATED KINASE 4 PROTEIN-RELATED	-1.0327	1.26026e-37
Glyma.03G115300.Wm82.a4.v1	(1 of 2) 1.14.13.70 - Sterol 14-alpha-demethylase / Obtusufoliol 14-demethylase	-1.03933	4.00783e-73
Glyma.06G250901.Wm82.a4.v1	(1 of 7) PTHR34053//PTHR34053:SF1 - FAMILY NOT NAMED // PROTEIN ULTRAPETALA 1-RELATED	-1.52734	0.00211909
Glyma.19G096200.Wm82.a4.v1	(1 of 2) PTHR31614:SF3 - POLLEN OLE E 1 ALLERGEN AND EXTENSIN FAMILY PROTEIN	-1.15166	6.2394e-08
Glyma.17G065000.Wm82.a4.v1	(1 of 9) PTHR31062//PTHR31062:SF32 - FAMILY NOT NAMED // XYLOGLUCAN ENDOTRANSGLUCOSYLASE/HYDROLASE PROTEIN 25-RELATED	-2.66291	0.00013293
Glyma.08G335200.Wm82.a4.v1	(1 of 5) K12349 - neutral ceramidase (ASAH2)	-1.10698	4.65675e-13
Glyma.03G188000.Wm82.a4.v1	(1 of 5) PTHR31065:SF4 - PLATZ TRANSCRIPTION FACTOR FAMILY PROTEIN	-1.34249	0.00569324
Glyma.11G233400.Wm82.a4.v1	(1 of 4) PTHR11709:SF22 - LACCASE-12-RELATED	-1.5173	3.06808e-42
Glyma.15G215600.Wm82.a4.v1	(1 of 1) KOG0531//KOG1187 - Protein phosphatase 1, regulatory subunit, and related proteins // Serine/threonine protein kinase	-1.05014	4.23075e-100
Glyma.01G184900.Wm82.a4.v1	-	-2.85503	0.000329308
Glyma.10G216000.Wm82.a4.v1	(1 of 3) PTHR23201:SF7 - GIBBERELLIN-REGULATED PROTEIN 2-RELATED	-5.48354	1.93497e-05
Glyma.19G182400.Wm82.a4.v1	(1 of 4) K00856 - adenosine kinase (E2.7.1.20, ADK)	-1.10064	1.27311e-11
Glyma.02G008100.Wm82.a4.v1	-	-1.25053	1.35208e-08
Glyma.06G086700.Wm82.a4.v1	-	-1.78272	7.63272e-12
Glyma.05G232300.Wm82.a4.v1	(1 of 4) PTHR22814//PTHR22814:SF104 - COPPER TRANSPORT PROTEIN ATOX1-RELATED // SUBFAMILY NOT NAMED	-1.09535	0.000932106
Glyma.13G359200.Wm82.a4.v1	(1 of 2) PTHR31852//PTHR31852:SF17 - FAMILY NOT NAMED // EXPRESSED PROTEIN	-2.71735	8.60733e-07
Glyma.10G279200.Wm82.a4.v1	(1 of 7) PTHR16007//PTHR16007:SF29 - EPIDIDYMAL MEMBRANE PROTEIN E9-RELATED // SUBFAMILY NOT NAMED	-1.28802	0.000179829
Glyma.07G047600.Wm82.a4.v1	(1 of 5) K08908 - light-harvesting complex I chlorophyll a/b binding protein 2 (LHCA2)	-1.69057	3.99186e-08
Glyma.08G012700.Wm82.a4.v1	(1 of 16) K09377 - cysteine and glycine-rich protein (CSRP)	-5.62883	4.54663e-05
Glyma.09G038500.Wm82.a4.v1	(1 of 4) PTHR22595//PTHR22595:SF42 - CHITINASE-RELATED // CHITINASE-LIKE PROTEIN 1	-1.07596	4.72949e-82
Glyma.11G043800.Wm82.a4.v1	(1 of 49) KOG0472//KOG1187 - Leucine-rich repeat protein // Serine/threonine protein kinase	-1.1921	3.04306e-27
Glyma.19G244600.Wm82.a4.v1	(1 of 5) 5.1.3.18 - GDP-mannose 3,5-epimerase	-2.51039	2.27539e-85
Glyma.07G268550.Wm82.a4.v1	(1 of 1) PTHR18919//PTHR18919:SF105//PTHR32054//PTHR32054:SF3 - ACETYL-COA C-ACYLTRANSFERASE // SUBFAMILY NOT NAMED // FAMILY NOT NAMED // SUBFAMILY NOT NAMED	-1.59927	0.000139076
Glyma.12G149600.Wm82.a4.v1	(1 of 2) PTHR12161//PTHR12161:SF20 - UNCHARACTERIZED DUF292 // SUBFAMILY NOT NAMED	-7.11103	1.07e-08
Glyma.20G233900.Wm82.a4.v1	(1 of 4) 3.2.1.152 - Mannosylglycoprotein endo-beta-mannosidase / Endo-beta-mannosidase	-2.20172	1.64964e-18
Glyma.06G122200.Wm82.a4.v1	(1 of 4) PTHR10791//PTHR10791:SF44 - RAG1-ACTIVATING PROTEIN 1 // BIDIRECTIONAL SUGAR TRANSPORTER SWEET1	-1.36649	1.84202e-05
Glyma.16G175900.Wm82.a4.v1	(1 of 2) K13263 - isoflavone 7-O-glucosyltransferase (IF7GT)	-1.06238	1.61097e-17
Glyma.15G184100.Wm82.a4.v1	(1 of 5) PTHR31707//PTHR31707:SF39 - FAMILY NOT NAMED // PECTINESTERASE/PECTINESTERASE INHIBITOR 12-RELATED	-1.02608	2.55273e-07
Glyma.04G001500.Wm82.a4.v1	(1 of 5) 1.3.1.75 - Divinyl chlorophyllide a 8-vinyl-reductase / [4-vinyl]chlorophyllide a reductase	-1.08781	3.17606e-06
Glyma.18G021600.Wm82.a4.v1	(1 of 7) PTHR24347//PTHR24347:SF167 - SERINE/THREONINE-PROTEIN KINASE // CBL-INTERACTING SERINE/THREONINE-PROTEIN KINASE 2	-1.21	1.96642e-10
Glyma.04G100600.Wm82.a4.v1	(1 of 16) KOG0149 - Predicted RNA-binding protein SEB4 (RRM superfamily)	-1.34693	2.14936e-11
Glyma.13G120500.Wm82.a4.v1	(1 of 4) K13407 - fatty acid omega-hydroxylase (CYP94A1)	-1.87743	0.00343626
Glyma.02G021500.Wm82.a4.v1	(1 of 7) PTHR10264//PTHR10264:SF93 - BAND 7 PROTEIN-RELATED // SUBFAMILY NOT NAMED	-2.00828	0.00131046
Glyma.12G021500.Wm82.a4.v1	(1 of 6) PF03435 - Saccharopine dehydrogenase NADP binding domain (Sacchrp_dh_NADP)	-1.31356	0.00376441
Glyma.14G001100.Wm82.a4.v1	(1 of 7) PTHR18966//PTHR18966:SF222 - IONOTROPIC GLUTAMATE RECEPTOR // GLUTAMATE RECEPTOR 3.1-RELATED	-2.33802	4.69863e-21
Glyma.10G003200.Wm82.a4.v1	(1 of 1) PTHR33428//PTHR33428:SF1 - FAMILY NOT NAMED // CHLOROPHYLLASE-2, CHLOROPLASTIC	-1.38436	5.28265e-06
Glyma.13G244100.Wm82.a4.v1	-	-1.1588	1.44639e-06
Glyma.14G012400.Wm82.a4.v1	(1 of 5) PTHR22601:SF8 - OLIGOPEPTIDE TRANSPORTER 1-RELATED	-1.31267	5.5382e-12
Glyma.11G088000.Wm82.a4.v1	(1 of 7) 1.1.1.34 - Hydroxymethylglutaryl-CoA reductase (NADPH) / HMG-CoA reductase	-2.48456	1.96275e-74
Glyma.15G082800.Wm82.a4.v1	(1 of 25) PF04852 - Protein of unknown function (DUF640) (DUF640)	-1.01976	1.7447e-26
Glyma.15G265500.Wm82.a4.v1	(1 of 2) PTHR13683//PTHR13683:SF280 - ASPARTYL PROTEASES // ASPARTYL PROTEASE FAMILY PROTEIN	-1.19073	5.78372e-11
Glyma.10G019900.Wm82.a4.v1	(1 of 2) PTHR11260:SF263 - GLUTATHIONE S-TRANSFERASE F13	-2.06928	5.90669e-15
Glyma.08G146500.Wm82.a4.v1	(1 of 2) PTHR11937//PTHR11937:SF217 - ACTIN // SUBFAMILY NOT NAMED	-1.0528	7.72577e-81
Glyma.03G159100.Wm82.a4.v1	(1 of 2) PTHR34552:SF1 - PHOTOSYSTEM II REACTION CENTER W PROTEIN, CHLOROPLASTIC	-1.14926	0.000166027
Glyma.03G184500.Wm82.a4.v1	(1 of 4) PTHR31062:SF52 - XYLOGLUCAN ENDOTRANSGLUCOSYLASE/HYDROLASE PROTEIN 31-RELATED	-1.10982	9.73525e-37
Glyma.17G210800.Wm82.a4.v1	(1 of 13) PF13259 - Protein of unknown function (DUF4050) (DUF4050)	-1.702	1.54714e-10
Glyma.12G116200.Wm82.a4.v1	(1 of 2) PTHR32093//PTHR32093:SF36 - FAMILY NOT NAMED // EXTENSIN-LIKE PROTEIN	-1.17392	6.56583e-05
Glyma.02G076900.Wm82.a4.v1	(1 of 36) PTHR11017//PTHR11017:SF162 - LEUCINE-RICH REPEAT-CONTAINING PROTEIN // SUBFAMILY NOT NAMED	-5.50624	8.40085e-05
Glyma.05G011300.Wm82.a4.v1	(1 of 4) PTHR22891//PTHR22891:SF25 - EUKARYOTIC TRANSLATION INITIATION FACTOR 2C // SUBFAMILY NOT NAMED	-2.30079	0.00785804
Glyma.17G216100.Wm82.a4.v1	(1 of 8) PTHR31194//PTHR31194:SF4 - SHN SHINE , DNA BINDING / TRANSCRIPTION FACTOR // ETHYLENE-RESPONSIVE TRANSCRIPTION FACTOR ERF003	-1.28001	1.66691e-05
Glyma.09G205400.Wm82.a4.v1	(1 of 2) PTHR32191//PTHR32191:SF14 - FAMILY NOT NAMED // PROTEIN TORNADO 2	-1.53721	6.40601e-60
Glyma.09G013800.Wm82.a4.v1	(1 of 4) PTHR22814//PTHR22814:SF94 - COPPER TRANSPORT PROTEIN ATOX1-RELATED // SUBFAMILY NOT NAMED	-1.50963	0.000909351
Glyma.03G222000.Wm82.a4.v1	(1 of 2) PTHR11183//PTHR11183:SF54 - GLYCOGENIN // SUBFAMILY NOT NAMED	-1.13428	8.45835e-27
Glyma.14G053600.Wm82.a4.v1	(1 of 4) PTHR31388:SF24 - PEROXIDASE 52	-2.80665	2.36815e-161
Glyma.10G259800.Wm82.a4.v1	(1 of 2) PTHR23201//PTHR23201:SF15 - EXTENSIN, PROLINE-RICH PROTEIN // GIBBERELLIN-REGULATED PROTEIN 7	-1.00938	0.000623854
Glyma.20G206000.Wm82.a4.v1	-	-4.68973	0.00333607
Glyma.02G171600.Wm82.a4.v1	(1 of 4) PTHR31388//PTHR31388:SF8 - FAMILY NOT NAMED // PEROXIDASE 53-RELATED	-1.64524	1.34263e-154
Glyma.10G097800.Wm82.a4.v1	(1 of 3) K03403 - magnesium chelatase subunit H (chlH, bchH)	-1.88295	3.9089e-21
Glyma.08G033100.Wm82.a4.v1	(1 of 4) PTHR32295//PTHR32295:SF22 - FAMILY NOT NAMED // PROTEIN IQ-DOMAIN 25	-2.48331	3.66951e-05
Glyma.02G062900.Wm82.a4.v1	(1 of 11) PTHR10992:SF820 - METHYLESTERASE 1-RELATED	-4.11276	0.00497283
Glyma.18G229700.Wm82.a4.v1	(1 of 11) K15095 - (+)-neomenthol dehydrogenase (E1.1.1.208)	-1.0172	0.00246037
Glyma.16G212300.Wm82.a4.v1	(1 of 50) PTHR11017//PTHR11017:SF171 - LEUCINE-RICH REPEAT-CONTAINING PROTEIN // SUBFAMILY NOT NAMED	-1.03801	7.84034e-05
Glyma.12G218200.Wm82.a4.v1	(1 of 5) PTHR10641//PTHR10641:SF567 - MYB-LIKE DNA-BINDING PROTEIN MYB // SUBFAMILY NOT NAMED	-2.90453	1.66661e-09
Glyma.20G223600.Wm82.a4.v1	(1 of 4) PTHR13132//PTHR13132:SF29 - ALPHA- 1,6 -FUCOSYLTRANSFERASE // ALPHA-(1,6)-FUCOSYLTRANSFERASE	-1.17503	1.77076e-10
Glyma.13G324300.Wm82.a4.v1	-	-3.07513	3.73454e-35
Glyma.11G194100.Wm82.a4.v1	(1 of 2) PTHR10641//PTHR10641:SF506 - MYB-LIKE DNA-BINDING PROTEIN MYB // SUBFAMILY NOT NAMED	-1.03044	1.60736e-20
Glyma.03G029900.Wm82.a4.v1	(1 of 20) PTHR24298:SF86 - CYTOCHROME P450 71B21-RELATED	-1.3766	3.07563e-14
Glyma.05G057100.Wm82.a4.v1	(1 of 34) PF14547 - Hydrophobic seed protein (Hydrophob_seed)	-1.3582	0
Glyma.15G161200.Wm82.a4.v1	(1 of 2227) 2.7.11.1 - Non-specific serine/threonine protein kinase / Threonine-specific protein kinase	-2.02007	2.00664e-26
Glyma.10G135266.Wm82.a4.v1	(1 of 273) PF00646 - F-box domain (F-box)	-8.3651	2.12358e-12
Glyma.08G076300.Wm82.a4.v1	(1 of 10) PTHR31851:SF6 - VACUOLAR IRON TRANSPORTER HOMOLOG 2.1	-7.046	2.03916e-08
Glyma.13G161900.Wm82.a4.v1	(1 of 2) PTHR22953:SF13 - BIFUNCTIONAL PURPLE ACID PHOSPHATASE 26	-1.55426	2.59613e-38
Glyma.15G084300.Wm82.a4.v1	(1 of 2) PTHR31933:SF2 - O-FUCOSYLTRANSFERASE-LIKE PROTEIN	-1.30323	3.04589e-05
Glyma.18G231500.Wm82.a4.v1	(1 of 14) PF00228 - Bowman-Birk serine protease inhibitor family (Bowman-Birk_leg)	-1.08853	2.07894e-50
Glyma.01G163100.Wm82.a4.v1	(1 of 4) PTHR31235//PTHR31235:SF67 - FAMILY NOT NAMED // PEROXIDASE 64	-1.07858	4.27559e-23
Glyma.08G038200.Wm82.a4.v1	(1 of 18) K17710 - pentatricopeptide repeat domain-containing protein 1 (PTCD1)	-1.13278	6.38212e-18
Glyma.07G086300.Wm82.a4.v1	(1 of 3) PTHR10015//PTHR10015:SF187 - HEAT SHOCK TRANSCRIPTION FACTOR // HEAT STRESS TRANSCRIPTION FACTOR C-1	-1.40705	0.0044855
Glyma.18G159700.Wm82.a4.v1	-	-1.00373	3.31043e-09
Glyma.01G025200.Wm82.a4.v1	(1 of 2) PTHR11206//PTHR11206:SF80 - MULTIDRUG RESISTANCE PROTEIN // SUBFAMILY NOT NAMED	-1.50699	1.43263e-07
Glyma.13G232500.Wm82.a4.v1	(1 of 4) K03405 - magnesium chelatase subunit I (chlI, bchI)	-1.11255	0.000138647
Glyma.12G079800.Wm82.a4.v1	(1 of 2) PTHR10641//PTHR10641:SF506 - MYB-LIKE DNA-BINDING PROTEIN MYB // SUBFAMILY NOT NAMED	-1.21834	4.23662e-25
Glyma.10G056200.Wm82.a4.v1	(1 of 155) K14488 - SAUR family protein (SAUR)	-6.0935	1.16498e-06
Glyma.15G260600.Wm82.a4.v1	(1 of 17) PTHR13683:SF298 - ASPARTIC PROTEINASE CDR1-RELATED	-9.16669	1.53643e-14
Glyma.04G151600.Wm82.a4.v1	(1 of 4) PTHR31727:SF2 - PALMITOYL-ACYL CARRIER PROTEIN THIOESTERASE, CHLOROPLASTIC	-1.56658	2.41016e-09
Glyma.02G045500.Wm82.a4.v1	(1 of 1) PTHR22952//PTHR22952:SF211 - CAMP-RESPONSE ELEMENT BINDING PROTEIN-RELATED // SUBFAMILY NOT NAMED	-3.74395	0.00236694
Glyma.U031113.Wm82.a4.v1	(1 of 4) PTHR31062:SF11 - XYLOGLUCAN ENDOTRANSGLUCOSYLASE/HYDROLASE PROTEIN 9	-1.44664	3.11269e-173
Glyma.12G182300.Wm82.a4.v1	(1 of 16) PF07876 - Stress responsive A/B Barrel Domain (Dabb)	-3.09026	4.98119e-11
Glyma.13G046200.Wm82.a4.v1	(1 of 4) K01602 - ribulose-bisphosphate carboxylase small chain (rbcS)	-1.3455	1.68907e-06
Glyma.13G168500.Wm82.a4.v1	(1 of 3) PTHR11615//PTHR11615:SF135 - NITRATE, FROMATE, IRON DEHYDROGENASE // SUBFAMILY NOT NAMED	-4.28603	1.13987e-41
Glyma.18G071700.Wm82.a4.v1	(1 of 4) PTHR22950//PTHR22950:SF277 - AMINO ACID TRANSPORTER // SUBFAMILY NOT NAMED	-1.83665	5.87935e-08
Glyma.05G208900.Wm82.a4.v1	(1 of 4) K15398 - fatty acid omega-hydroxylase (CYP86A4S)	-2.56961	4.03249e-08
Glyma.13G340800.Wm82.a4.v1	(1 of 17) PTHR10593//PTHR10593:SF27 - SERINE/THREONINE-PROTEIN KINASE RIO // SUBFAMILY NOT NAMED	-1.18719	5.42839e-07
Glyma.14G162100.Wm82.a4.v1	(1 of 2) PTHR13832//PTHR13832:SF326 - PROTEIN PHOSPHATASE 2C // SUBFAMILY NOT NAMED	-2.10426	0.000994951
Glyma.12G020400.Wm82.a4.v1	(1 of 9) PTHR19241//PTHR19241:SF247 - ATP-BINDING CASSETTE TRANSPORTER // SUBFAMILY NOT NAMED	-1.15545	9.60013e-06
Glyma.11G226900.Wm82.a4.v1	(1 of 2) 3.1.3.37 - Sedoheptulose-bisphosphatase / Sedoheptulose-1,7-bisphosphatase	-4.78945	0.00249877
Glyma.17G117400.Wm82.a4.v1	-	-1.05888	0.000125124
Glyma.12G054700.Wm82.a4.v1	(1 of 8) PTHR11771//PTHR11771:SF42 - LIPOXYGENASE // PROTEIN C13C4.7	-1.30066	0.00882019
Glyma.13G259200.Wm82.a4.v1	-	-1.08265	4.55499e-29
Glyma.19G259500.Wm82.a4.v1	(1 of 3) PTHR31989//PTHR31989:SF45 - FAMILY NOT NAMED // NAC DOMAIN-CONTAINING PROTEIN 43-RELATED	-2.22304	0.000381756
Glyma.13G337900.Wm82.a4.v1	(1 of 3) K07025 - putative hydrolase of the HAD superfamily (K07025)	-1.33054	3.86823e-05
Glyma.05G220500.Wm82.a4.v1	(1 of 4) PTHR24286//PTHR24286:SF66 - FAMILY NOT NAMED // CYTOCHROME P450 FAMILY PROTEIN-RELATED	-1.68237	4.10355e-256
Glyma.18G025600.Wm82.a4.v1	(1 of 4) PTHR31301//PTHR31301:SF24 - FAMILY NOT NAMED // LOB DOMAIN-CONTAINING PROTEIN 21	-1.27645	0.000204317
Glyma.08G269900.Wm82.a4.v1	-	-1.04861	8.59132e-08
Glyma.11G172300.Wm82.a4.v1	(1 of 5) PTHR14155:SF135 - RING-H2 FINGER PROTEIN ATL63	-1.6264	0.00913867
Glyma.14G012900.Wm82.a4.v1	(1 of 4) PTHR13301//PTHR13301:SF54 - X-BOX TRANSCRIPTION FACTOR-RELATED // SUBFAMILY NOT NAMED	-1.98941	0.000396698
Glyma.08G193500.Wm82.a4.v1	(1 of 8) PTHR23421//PTHR23421:SF74 - BETA-GALACTOSIDASE RELATED // BETA-GALACTOSIDASE 1	-1.02952	3.42925e-41
Glyma.11G162574.Wm82.a4.v1	(1 of 91) 3.2.1.15 - Polygalacturonase / Pectinase	-10.1066	1.57775e-17
Glyma.20G192800.Wm82.a4.v1	(1 of 3) 1.10.3.2//1.10.3.3 - Laccase / Urishiol oxidase // L-ascorbate oxidase / Ascorbase	-2.693	2.57554e-09
Glyma.13G183000.Wm82.a4.v1	(1 of 3) 1.10.3.1//1.14.18.1 - Catechol oxidase / Tyrosinase // Tyrosinase / Tyrosine-dopa oxidase	-3.43373	0
Glyma.07G128700.Wm82.a4.v1	(1 of 2) PTHR35133:SF1 - EFFECTOR OF TRANSCRIPTION2-RELATED	-5.70497	1.78472e-104
Glyma.17G211200.Wm82.a4.v1	(1 of 6) PTHR27002//PTHR27002:SF31 - FAMILY NOT NAMED // G-TYPE LECTIN S-RECEPTOR-LIKE SERINE/THREONINE-PROTEIN KINASE SD2-5	-1.43798	1.42491e-07
Glyma.11G042900.Wm82.a4.v1	(1 of 4) PTHR31500//PTHR31500:SF17 - FAMILY NOT NAMED // AT HOOK MOTIF DNA-BINDING FAMILY PROTEIN	-1.02532	0.000638124
Glyma.04G049500.Wm82.a4.v1	(1 of 3) PTHR11850:SF64 - HOMEOBOX PROTEIN KNOTTED-1-LIKE 1	-3.0356	6.77044e-19
Glyma.04G220700.Wm82.a4.v1	(1 of 5) PTHR11654:SF155 - PROTEIN NRT1/ PTR FAMILY 5.1	-8.19303	1.16169e-11
Glyma.08G335700.Wm82.a4.v1	-	-1.33512	6.3584e-12
Glyma.02G106800.Wm82.a4.v1	(1 of 4) PTHR33781:SF4 - PROTEIN PHYTOCHROME KINASE SUBSTRATE 1-RELATED	-1.93837	0.00011455
Glyma.01G129700.Wm82.a4.v1	-	-1.82087	2.07121e-94
Glyma.09G235200.Wm82.a4.v1	(1 of 7) PTHR10783//PTHR10783:SF43 - XENOTROPIC AND POLYTROPIC RETROVIRUS RECEPTOR 1-RELATED // PHOSPHATE TRANSPORTER PHO1 HOMOLOG 2-RELATED	-1.02615	0.00724559
Glyma.07G129100.Wm82.a4.v1	(1 of 2) PTHR32191//PTHR32191:SF0 - FAMILY NOT NAMED // TETRASPANIN-2	-1.65674	0.00081013
Glyma.17G260400.Wm82.a4.v1	(1 of 5) PTHR31867//PTHR31867:SF4 - FAMILY NOT NAMED // EXPANSIN-A11	-1.24028	8.86299e-20
Glyma.06G065600.Wm82.a4.v1	(1 of 1) K07192 - flotillin (FLOT)	-1.76091	1.13108e-17
Glyma.06G315400.Wm82.a4.v1	(1 of 25) PF04852 - Protein of unknown function (DUF640) (DUF640)	-7.11937	3.95293e-09
Glyma.08G232100.Wm82.a4.v1	(1 of 3) PTHR10217//PTHR10217:SF520 - VOLTAGE AND LIGAND GATED POTASSIUM CHANNEL // SUBFAMILY NOT NAMED	-2.36795	3.01837e-07
Glyma.01G106800.Wm82.a4.v1	(1 of 2) PTHR11527//PTHR11527:SF153 - SMALL HEAT-SHOCK PROTEIN HSP20 FAMILY // SUBFAMILY NOT NAMED	-1.01788	0.000530594
Glyma.15G253700.Wm82.a4.v1	(1 of 2) K03541 - photosystem II 10kDa protein (psbR)	-1.05143	0.000188118
Glyma.19G212600.Wm82.a4.v1	(1 of 3) PTHR31707:SF25 - PECTINESTERASE/PECTINESTERASE INHIBITOR 39-RELATED	-1.66709	2.36401e-20
Glyma.07G126000.Wm82.a4.v1	(1 of 4) PTHR27000//PTHR27000:SF4 - FAMILY NOT NAMED // EXTENSIN-LIKE PROTEIN-RELATED	-1.002	9.84579e-07
Glyma.04G018800.Wm82.a4.v1	(1 of 60) PF03087 - Arabidopsis protein of unknown function (DUF241)	-1.54566	9.91143e-06
Glyma.12G128900.Wm82.a4.v1	(1 of 19) 1.13.11.19 - Cysteamine dioxygenase / Persulfurase	-1.28617	5.75495e-10
Glyma.16G177700.Wm82.a4.v1	(1 of 3) PF00646//PF05641 - F-box domain (F-box) // Agenet domain (Agenet)	-6.97901	2.60883e-08
Glyma.12G062700.Wm82.a4.v1	(1 of 3) PTHR31867:SF29 - EXPANSIN-A3	-1.13454	1.09204e-55
Glyma.16G021600.Wm82.a4.v1	(1 of 4) PF13301 - Protein of unknown function (DUF4079) (DUF4079)	-1.24895	1.98934e-08
Glyma.01G037000.Wm82.a4.v1	(1 of 19) PTHR10201//PTHR10201:SF140 - MATRIX METALLOPROTEINASE // F20P5.11 PROTEIN	-5.43811	0.000127546
Glyma.04G211800.Wm82.a4.v1	(1 of 4) PTHR19241//PTHR19241:SF230 - ATP-BINDING CASSETTE TRANSPORTER // ABC TRANSPORTER G FAMILY MEMBER 5	-2.59911	0.000519311
Glyma.05G041100.Wm82.a4.v1	(1 of 74) PF00582 - Universal stress protein family (Usp)	-5.60011	1.98442e-07
Glyma.05G176500.Wm82.a4.v1	-	-4.0638	4.22796e-05
Glyma.14G089024.Wm82.a4.v1	(1 of 4) PTHR24206:SF35 - TRANSCRIPTION FACTOR-RELATED	-1.84284	9.29249e-17
Glyma.10G228900.Wm82.a4.v1	(1 of 25) PF00069//PF00954//PF01453 - Protein kinase domain (Pkinase) // S-locus glycoprotein domain (S_locus_glycop) // D-mannose binding lectin (B_lectin)	-2.44174	1.05058e-17
Glyma.12G214700.Wm82.a4.v1	(1 of 4) PTHR32116//PTHR32116:SF24 - FAMILY NOT NAMED // GALACTURONOSYLTRANSFERASE 12-RELATED	-1.28607	2.99472e-21
Glyma.10G184500.Wm82.a4.v1	-	-5.84362	1.5522e-05
Glyma.12G051800.Wm82.a4.v1	(1 of 4) PTHR10584:SF168 - F14I3.3 PROTEIN-RELATED	-1.41776	3.64691e-07
Glyma.12G225600.Wm82.a4.v1	(1 of 4) PTHR11206:SF78 - MATE EFFLUX FAMILY PROTEIN ALF5-RELATED	-1.79685	8.90401e-10
Glyma.09G171700.Wm82.a4.v1	(1 of 4) PTHR13068:SF9 - MITOCHONDRIAL TRANSCRIPTION TERMINATION FACTOR FAMILY PROTEIN	-1.13056	0.00709982
Glyma.14G035100.Wm82.a4.v1	-	-7.26984	9.0905e-18
Glyma.04G052200.Wm82.a4.v1	(1 of 111) PF00612 - IQ calmodulin-binding motif (IQ)	-1.11925	3.27393e-09
Glyma.20G058000.Wm82.a4.v1	(1 of 3) PTHR10572//PTHR10572:SF9 - 3-HYDROXY-3-METHYLGLUTARYL-COENZYME A REDUCTASE // 3-HYDROXY-3-METHYLGLUTARYL-COENZYME A REDUCTASE 1	-1.27255	8.79929e-14
Glyma.02G005200.Wm82.a4.v1	(1 of 1) PTHR11732:SF255 - ARYL-ALCOHOL DEHYDROGENASE YPL088W-RELATED	-1.32031	1.00044e-05
Glyma.04G028600.Wm82.a4.v1	(1 of 5) PTHR23421//PTHR23421:SF51 - BETA-GALACTOSIDASE RELATED // BETA-GALACTOSIDASE 5	-1.50966	2.03508e-27
Glyma.02G244000.Wm82.a4.v1	(1 of 2) PTHR20852//PTHR20852:SF62 - GLUTAMINE SYNTHETASE // GLUTAMINE SYNTHETASE CYTOSOLIC ISOZYME 1-3-RELATED	-1.84171	0.00156783
Glyma.11G140700.Wm82.a4.v1	-	-3.84486	0.000104627
Glyma.14G015300.Wm82.a4.v1	(1 of 108) 3.6.3.44 - Xenobiotic-transporting ATPase / Steroid-transporting ATPase	-2.87269	3.94253e-35
Glyma.09G153900.Wm82.a4.v1	(1 of 3) PTHR11902//PTHR11902:SF18 - ENOLASE // SUBFAMILY NOT NAMED	-1.48257	1.46046e-52
Glyma.03G138400.Wm82.a4.v1	(1 of 5) PTHR27002//PTHR27002:SF42 - FAMILY NOT NAMED // G-TYPE LECTIN S-RECEPTOR-LIKE SERINE/THREONINE-PROTEIN KINASE SD3-1	-1.02173	2.18984e-06
Glyma.10G126051.Wm82.a4.v1	-	-10.0699	2.05917e-17
Glyma.14G041600.Wm82.a4.v1	(1 of 2) PTHR27000//PTHR27000:SF8 - FAMILY NOT NAMED // LEUCINE-RICH REPEAT PROTEIN KINASE-LIKE PROTEIN	-1.15022	5.81845e-07
Glyma.16G017100.Wm82.a4.v1	(1 of 4) PTHR31140//PTHR31140:SF4 - FAMILY NOT NAMED // B3 DOMAIN-CONTAINING TRANSCRIPTION FACTOR NGA1-RELATED	-1.21604	1.09047e-11
Glyma.19G099500.Wm82.a4.v1	(1 of 2) PTHR11615//PTHR11615:SF157 - NITRATE, FROMATE, IRON DEHYDROGENASE // SUBFAMILY NOT NAMED	-2.0128	1.23017e-15
Glyma.08G014200.Wm82.a4.v1	(1 of 2) PTHR11588//PTHR11588:SF124 - TUBULIN // SUBFAMILY NOT NAMED	-1.55889	3.76007e-65
Glyma.13G309600.Wm82.a4.v1	-	-1.04533	2.14414e-05
Glyma.02G048600.Wm82.a4.v1	(1 of 4) K00475 - naringenin 3-dioxygenase (E1.14.11.9)	-1.40551	1.9748e-76
Glyma.01G209700.Wm82.a4.v1	-	-1.98097	4.51529e-05
Glyma.08G251700.Wm82.a4.v1	(1 of 273) PF00646 - F-box domain (F-box)	-5.74181	2.62511e-05
Glyma.18G186400.Wm82.a4.v1	(1 of 16) K08081 - Tropinone reductase 1 (TR1)	-1.41202	1.3364e-11
Glyma.16G172600.Wm82.a4.v1	(1 of 5) K05666 - ATP-binding cassette, subfamily C (CFTR/MRP), member 2 (ABCC2)	-1.05616	2.70173e-15
Glyma.11G162500.Wm82.a4.v1	-	-2.3109	4.46352e-12
Glyma.11G196300.Wm82.a4.v1	(1 of 4) PTHR11850//PTHR11850:SF125 - HOMEOBOX PROTEIN TRANSCRIPTION FACTORS // SUBFAMILY NOT NAMED	-2.39127	1.07674e-38
Glyma.20G158500.Wm82.a4.v1	(1 of 4) PTHR33836:SF1 - ARM REPEAT SUPERFAMILY PROTEIN-RELATED	-4.89981	1.6344e-16
Glyma.08G269000.Wm82.a4.v1	(1 of 7) PTHR21596//PTHR21596:SF25 - RIBONUCLEASE P SUBUNIT P38 // TRANSCRIPTION REGULATOR-LIKE-RELATED	-1.14829	9.69548e-07
Glyma.10G017000.Wm82.a4.v1	(1 of 5) PTHR22298:SF55 - ENDOGLUCANASE 1-RELATED	-1.82476	0.000446747
Glyma.11G152333.Wm82.a4.v1	(1 of 5) PTHR31301:SF14 - LOB DOMAIN-CONTAINING PROTEIN 1-RELATED	-2.24454	9.67924e-43
Glyma.11G074700.Wm82.a4.v1	(1 of 2) PTHR31623//PTHR31623:SF3 - FAMILY NOT NAMED // F21J9.9	-1.4105	2.49041e-99
Glyma.02G080000.Wm82.a4.v1	-	-1.83862	0.00296515
Glyma.06G185200.Wm82.a4.v1	(1 of 5) PF04134 - Protein of unknown function, DUF393 (DUF393)	-1.15169	0.000132668
Glyma.20G246300.Wm82.a4.v1	(1 of 5) PTHR24064:SF113 - INOSITOL TRANSPORTER 1	-2.15359	0.00489311
Glyma.01G011900.Wm82.a4.v1	(1 of 2) PF12796//PF13961//PF13962 - Ankyrin repeats (3 copies) (Ank_2) // Domain of unknown function (DUF4219) (DUF4219) // Domain of unknown function (PGG)	-1.06162	2.26186e-49
Glyma.06G159600.Wm82.a4.v1	(1 of 2) PTHR10972//PTHR10972:SF100//PTHR10972:SF67 - OXYSTEROL-BINDING PROTEIN-RELATED // OXYSTEROL-BINDING PROTEIN HOMOLOG 3 // OXYSTEROL-BINDING PROTEIN-RELATED PROTEIN 1D	-2.95145	0.00832519
Glyma.06G154500.Wm82.a4.v1	(1 of 4) PTHR19241//PTHR19241:SF230 - ATP-BINDING CASSETTE TRANSPORTER // ABC TRANSPORTER G FAMILY MEMBER 5	-2.55224	0.0077743
Glyma.06G160300.Wm82.a4.v1	(1 of 5) PTHR33147//PTHR33147:SF3 - FAMILY NOT NAMED // DEFENSIN-LIKE PROTEIN 6	-7.17135	5.05031e-12
Glyma.05G050000.Wm82.a4.v1	-	-1.93819	0.00624414
Glyma.19G011400.Wm82.a4.v1	(1 of 2) PTHR11527//PTHR11527:SF170 - SMALL HEAT-SHOCK PROTEIN HSP20 FAMILY // SUBFAMILY NOT NAMED	-1.20267	3.44109e-07
Glyma.17G063900.Wm82.a4.v1	(1 of 2) PTHR23070//PTHR23070:SF17 - BCS1 AAA-TYPE ATPASE // MITOCHONDRIAL CHAPERONE BCS1	-1.76078	5.85553e-17
Glyma.20G024200.Wm82.a4.v1	(1 of 8) PF02451 - Nodulin (Nodulin)	-12.5667	1.65921e-26
Glyma.15G002200.Wm82.a4.v1	(1 of 2) 1.14.13.78 - Ent-kaurene oxidase	-1.50549	5.6606e-39
Glyma.08G026900.Wm82.a4.v1	(1 of 4) PTHR24286//PTHR24286:SF66 - FAMILY NOT NAMED // CYTOCHROME P450 FAMILY PROTEIN-RELATED	-1.01641	3.63342e-62
